# Supplementary material for: Three-component approach to modular synthesis of tetra-substituted furans and pyrroles
Source: Royal Society of Chemistry journal article supplement (doi:10.1039/d3qo02096g), 2024-01-01

## Supporting Information

### Three-Component Approach to the Modular Synthesis of Tetra-Substituted Furans/Pyrroles

Pei Zhang,<sup>+</sup> Wenqing Ti,<sup>+</sup> Tianfeng Gao, Jie Zhu, Aijun Lin, Shang Gao, Xuanyi Li\* and  
Hequan Yao\*

*State Key Laboratory of Natural Medicines (SKLNM) and Department of Medicinal Chemistry,  
School of Pharmacy, China Pharmaceutical University, Nanjing 210009, P. R. China*

\*E-mail: xuanyili@cpu.edu.cn; hyao@cpu.edu.cn.

#### CONTENT

|     |                                                                                              |    |
|-----|----------------------------------------------------------------------------------------------|----|
| 1.  | <i>General Information</i> .....                                                             | 2  |
| 2.  | <i>General Procedure for the Synthesis of p-QMs 1</i> .....                                  | 3  |
| 3.  | <i>General Procedure for the Synthesis of 2</i> .....                                        | 4  |
| 4.  | <i>Characterization of the p-QMs Derived Adducts 2</i> .....                                 | 6  |
| 5.  | <i>General Procedure for the Synthesis of Tetra-substituted Pyrrole/Furans</i> .....         | 11 |
| 6.  | <i>Characterization of the Products of Tetra-substituted Pyrrole/Furans</i> .....            | 12 |
| 7.  | <i>Gram-scale Reactions</i> .....                                                            | 24 |
| 8.  | <i>Mechanism Studies</i> .....                                                               | 24 |
| 9.  | <i>Derivatization of Products</i> .....                                                      | 25 |
| 10. | <i>Crystal Structure of 4x and 7a</i> .....                                                  | 32 |
| 11. | <i><sup>1</sup>H, <sup>13</sup>C and <sup>19</sup>F NMR Spectra of Title Compounds</i> ..... | 35 |

## 1. General Information

**Reagents and Solvents:** PE refers to petroleum ether b. p. 60-90 °C, EA refers to ethyl acetate, and DCM refers to dichloromethane. All other starting materials and solvents were commercially available and were used without further purification unless otherwise stated.

**Chromatography:** Flash column chromatography was carried out using commercially available 200-300 mesh under pressure unless otherwise indicated. Gradient flash chromatography was conducted eluting with PE/EA, they were listed as volume/volume ratios.

**Data collection:**  $^1\text{H}$ ,  $^{13}\text{C}$  and  $^{19}\text{F}$  NMR spectra were collected on BRUKER AV-300 (300 MHz) spectrometer using  $\text{CDCl}_3$  or  $\text{DMSO-}d_6$  as solvent. Chemical shifts of  $^1\text{H}$  NMR were recorded in parts per million (ppm,  $\delta$ ) relative to tetramethylsilane ( $\delta = 0.00$  ppm) with the solvent resonance as an internal standard ( $\text{CDCl}_3$ :  $\delta = 7.26$  ppm,  $\text{DMSO-}d_6$ :  $\delta = 2.50$  ppm). Data are reported as follows: chemical shift in ppm ( $\delta$ ), multiplicity (s = singlet, d = doublet, t = triplet, q = quartet, brs = broad singlet, m = multiplet), coupling constant (Hz), and integration. Chemical shifts of  $^{13}\text{C}$  NMR were reported in ppm with the solvent as the internal standard ( $\text{CDCl}_3$ :  $\delta = 77.16$  ppm,  $\text{DMSO-}d_6$ :  $\delta = 39.52$  ppm). High Resolution Mass measurement was performed on Agilent Q-TOF 6520 mass spectrometer with electron spray ionization (ESI) as the ion source. Melting point (m. p.) was measured on a microscopic melting point apparatus. X-ray diffraction analyses were carried out on a microcrystalline powder using a Rigaku Oxford Diffraction XtaLAB Synergy-S diffractometer using Mo radiation ( $\lambda = 0.71073$  Å).

## 2. General Procedure for the Synthesis of *p*-QMs 1

The *p*-QMs **1a** – **1q** were prepared according to the reported literature procedures.<sup>[1]</sup>

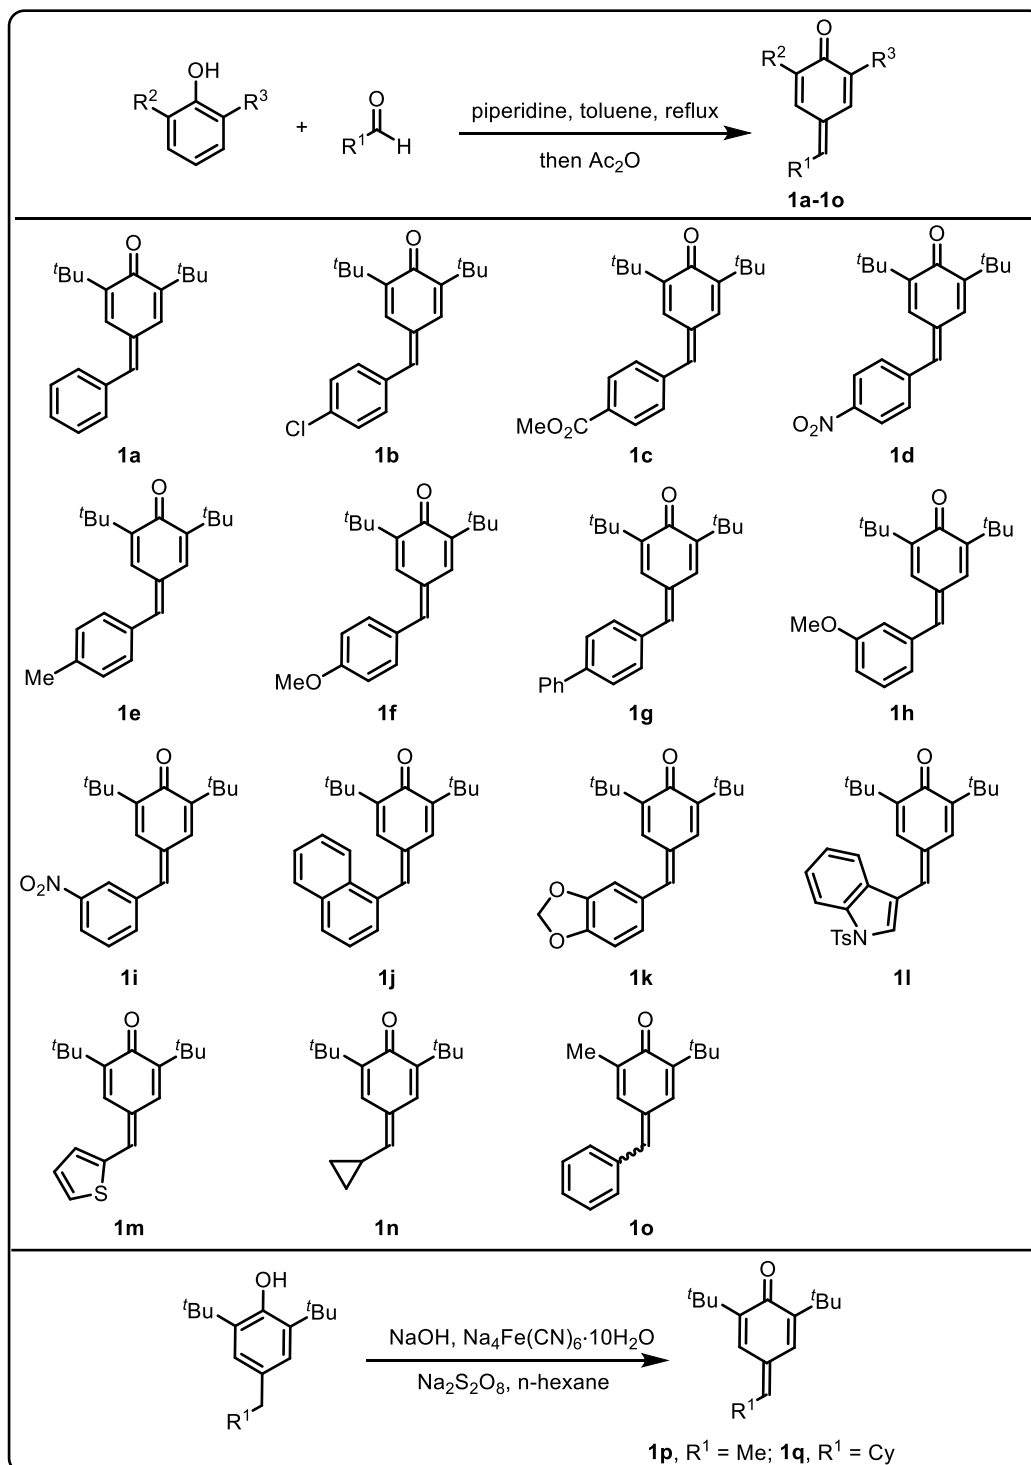

Figure S1. Synthesis of *p*-QMs

### 3. General Procedure for the Synthesis of 2

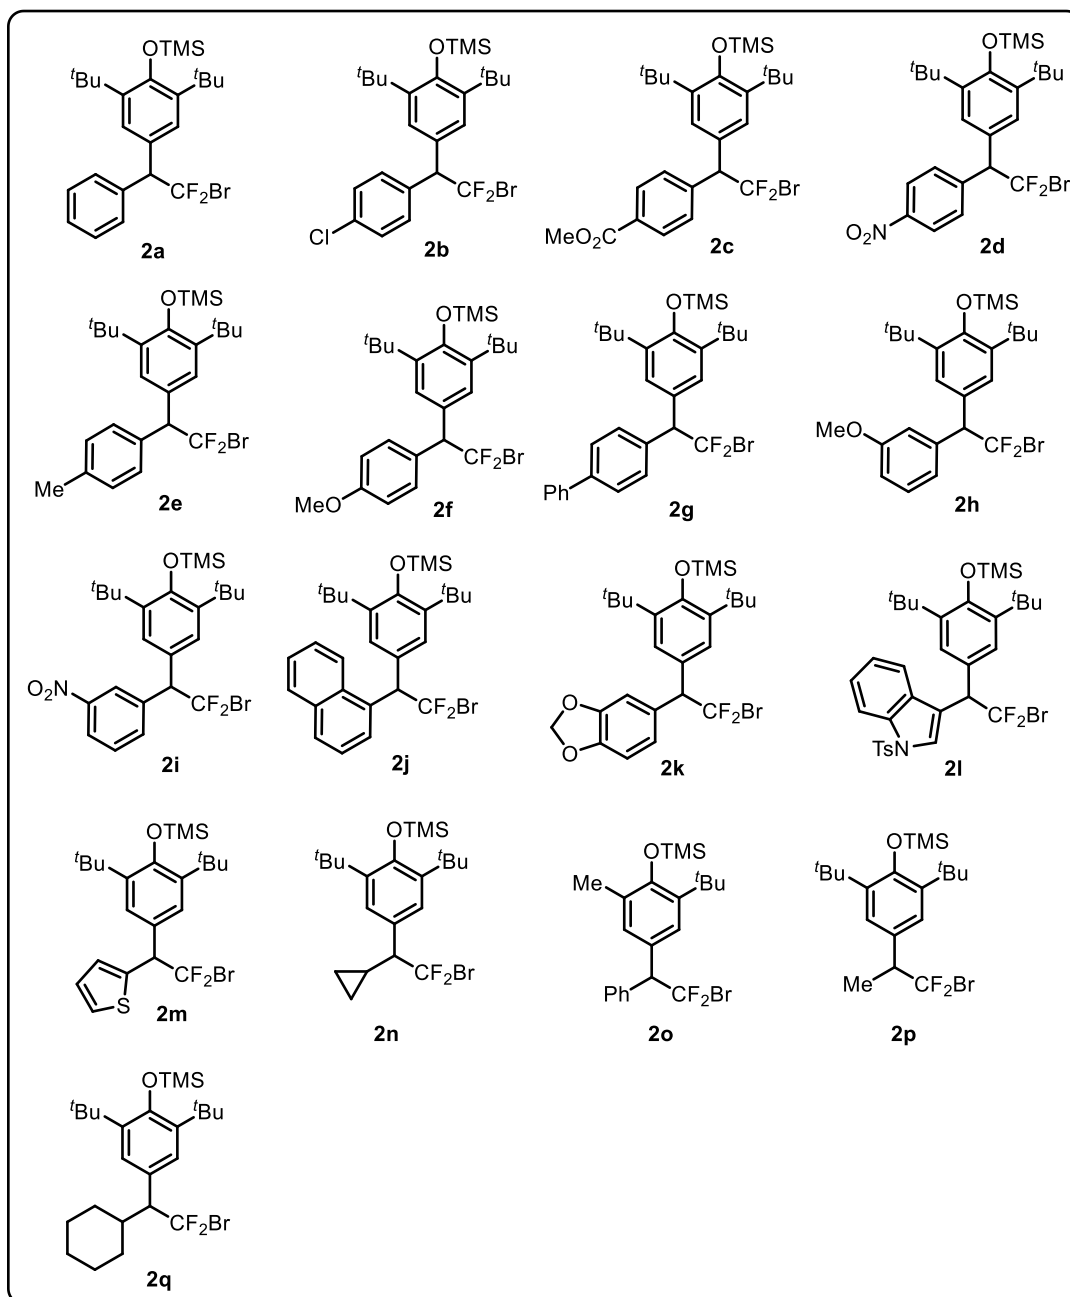

Figure S2. Structures of *p*-QMs Derivatives

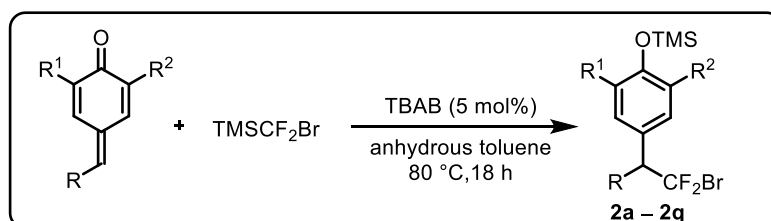

Scheme S1. General procedure for the synthesis of 2



To an oven-dried 10 mL Schlenk tube equipped with a Teflon coated magnetic stir bar was added *p*-QMs (1 mmol, 1.0 eq.) and TBAB (16 mg, 0.05 mmol, 5 mol %). Then the Schlenk tube was evacuated and filled with argon for three times. After that, TMSCF<sub>2</sub>Br (406.2 mg, 2.0 mmol, 2.0 eq.) dissolved in toluene (2.0 mL) was added under argon atmosphere via a syringe. The reaction mixture was stirred at 80 °C in oil bath for 18 h. After completed consumption of starting material, the resulting mixture was then poured into ice water (5 mL), extracted with ethyl acetate (3 × 5 mL). The organic layers were combined and dried over anhydrous MgSO<sub>4</sub>. After removal of the solvent in vacuo, the crude material was purified by flash chromatography on silica gel (PE) to afford the desired product **2a – 2q**.

## 4. Characterization of the *p*-QMs Derived Adducts 2

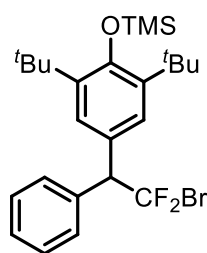

**(4-(2-bromo-2,2-difluoro-1-phenylethyl)-2,6-di-tert-butylphenoxy)trimethylsilane (2a)** Prepared through general procedure to give **2a** in 476.3 mg, 97% yield. White solid, m.p. 70 – 72 °C,  $R_f$  = 0.7 (PE/EA = 50/1).  $^1\text{H}$  NMR (300 Hz,  $\text{CDCl}_3$ )  $\delta$  7.26 – 7.16 (m, 5H), 7.05 (s, 2H), 5.18 (dd,  $J$  = 18.3, 5.4 Hz, 1H), 1.34 (s, 18H), 0.43 (s, 9H) ppm.  $^{13}\text{C}$  NMR (75 MHz,  $\text{CDCl}_3$ ) 154.8, 140.8, 135.5 (*app. d*,  $^3J$  = 4.2 Hz), 129.8, 129.1, 128.3, 124.7 (dd,  $^3J$  = 27.0, 25.4 Hz), 124.0 (dd,  $^4J$  = 5.1, 5.2 Hz), 120.0 (dd,  $^1J$  = 250.9, 248.9 Hz), 56.0 (dd,  $^2J$  = 33.6, 29.9 Hz), 35.3, 31.3 ppm.  $^{19}\text{F}$  NMR (282 MHz,  $\text{CDCl}_3$ )  $\delta$  -93.6 (d,  $J$  = 236.3 Hz), -102.9 (d,  $J$  = 235.9 Hz) ppm. HRMS (ESI)  $m/z$  Calcd for  $[\text{C}_{25}\text{H}_{35}\text{BrF}_2\text{OSi} + \text{Na}]^+$  519.1495, found 519.1496.

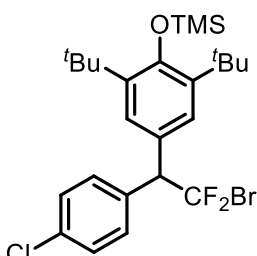

**(4-(2-bromo-1-(4-chlorophenyl)-2,2-difluoroethyl)-2,6-di-tert-butylphenoxy)trimethylsilane (2b)** Prepared through general procedure to give **2b** in 493.0 mg, 93% yield. White solid, m.p. 72 – 74 °C,  $R_f$  = 0.7 (PE/EA = 50/1).  $^1\text{H}$  NMR (300 Hz,  $\text{CDCl}_3$ )  $\delta$  7.19 – 7.16 (m, 2H), 7.13 – 7.09 (m, 2H), 6.98 (s, 2H), 5.07 (dd,  $J$  = 17.8, 5.9 Hz, 1H), 1.28 (s, 18H), 0.37 (s, 9H) ppm.  $^{13}\text{C}$  NMR (75 MHz,  $\text{CDCl}_3$ )  $\delta$  154.9, 140.9, 135.0, 134.0 (*app. d*,  $^3J$  = 4.4 Hz), 131.0, 128.4, 124.4 (dd,  $^3J$  = 26.3, 26.3 Hz), 124.4 (dd,  $^4J$  = 5.8, 5.8 Hz), 119.7 (dd,  $^1J$  = 248.5, 248.5 Hz), 54.8 (dd,  $^2J$  = 30.5, 30.6 Hz), 35.3, 31.2, 3.7 ppm.  $^{19}\text{F}$  NMR (282 MHz,  $\text{CDCl}_3$ )  $\delta$  -93.9 (d,  $J$  = 235.4 Hz), -104.0 (d,  $J$  = 235.7 Hz) ppm. HRMS (ESI)  $m/z$  Calcd for  $[\text{C}_{25}\text{H}_{34}\text{BrClF}_2\text{OSi} + \text{H}]^+$  531.1292, found 531.1294.

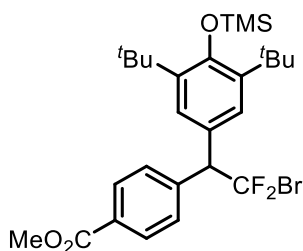

**methyl 4-(2-bromo-1-(3,5-di-tert-butyl-4-((trimethylsilyl)oxy)phenyl)-2,2-difluoroethyl)benzoate (2c)** Prepared through general procedure to give **2c** in 520.9 mg, 94% yield. White solid, m.p. 84 – 86 °C,  $R_f$  = 0.7 (PE/EA = 50/1).  $^1\text{H}$  NMR (300 Hz,  $\text{CDCl}_3$ )  $\delta$  7.88 (d,  $J$  = 8.1 Hz, 2H), 7.27 (d,  $J$  = 8.0 Hz, 2H), 7.01 (s, 2H), 5.17 (dd,  $J$  = 17.4, 6.1 Hz, 1H), 3.89 (s, 3H), 1.27 (s, 18H), 0.36 (s, 9H) ppm.  $^{13}\text{C}$  NMR (75 MHz,  $\text{CDCl}_3$ )  $\delta$  166.3, 154.8, 140.9, 142.2 (*app. d*,  $^3J$  = 4.1 Hz), 130.6, 129.6, 129.4, 124.4 (dd,  $^3J$  = 26.2, 26.2 Hz), 123.8 (dd,  $^4J$  = 5.8, 5.8 Hz), 119.6 (dd,  $^1J$  = 249.6, 249.2 Hz), 54.8 (dd,  $^2J$  = 34.3, 30.4 Hz), 52.3, 35.2, 31.1, 3.7 ppm.  $^{19}\text{F}$  NMR (282 MHz,  $\text{CDCl}_3$ )  $\delta$  -93.6 (d,  $J$  = 236.4 Hz), -103.4 (d,  $J$  = 236.6 Hz) ppm. HRMS (ESI)  $m/z$  Calcd for  $[\text{C}_{27}\text{H}_{37}\text{BrF}_2\text{O}_3\text{Si} + \text{Na}]^+$  577.1556, found 577.1546.

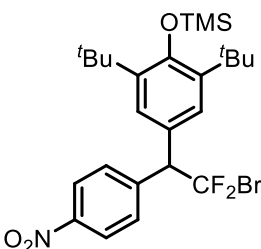

**(4-(2-bromo-2,2-difluoro-1-(4-nitrophenyl)ethyl)-2,6-di-tert-butylphenoxy)trimethylsilane (2d)** Prepared through general procedure to give **2d** in 481.5 mg, 89% yield. White solid, m.p. 100 – 102 °C,  $R_f$  = 0.4 (PE/EA = 50/1).  $^1\text{H}$  NMR (300 Hz,  $\text{CDCl}_3$ )  $\delta$  8.08 (d,  $J$  = 8.8 Hz, 2H), 7.40 (d,  $J$  = 8.4 Hz, 2H), 7.02 (s, 2H), 5.21 (dd,  $J$  = 16.6, 6.6 Hz, 1H), 1.28 (s, 18H), 0.37 (s, 9H) ppm.

$^{13}\text{C}$  NMR (75 MHz,  $\text{CDCl}_3$ )  $\delta$  155.1, 147.9, 142.4 (*app. d*,  $^3J = 4.0$  Hz), 141.2, 130.8, 124.2 (dd,  $^3J = 26.2, 26.2$  Hz), 123.7 (dd,  $^4J = 5.9, 5.9$  Hz), 123.3, 119.4 (dd,  $^1J = 250.3, 250.0$  Hz), 53.8 (dd,  $^2J = 34.8, 31.2$  Hz), 35.2, 31.1, 3.7 ppm.  $^{19}\text{F}$  NMR (282 MHz,  $\text{CDCl}_3$ )  $\delta$  -94.0 (d,  $J = 237.9$  Hz), -103.1 (d,  $J = 237.7$  Hz) ppm. HRMS (ESI)  $m/z$  Calcd for  $[\text{C}_{25}\text{H}_{34}\text{BrF}_2\text{NO}_3\text{Si} + \text{H}]^+$  542.1532, found 542.1535.

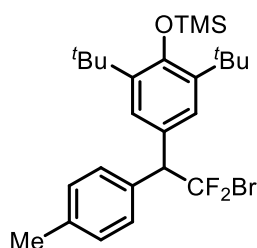

**(4-(2-bromo-2,2-difluoro-1-(p-tolyl)ethyl)-2,6-di-tert-butylphenoxy)trimethylsilane (2e)** Prepared through general procedure to give **2e** in 397.9 mg, 78% yield. White solid, m.p. 100 – 102 °C,  $R_f = 0.7$  (PE/EA = 50/1).  $^1\text{H}$  NMR (300 MHz,  $\text{CDCl}_3$ )  $\delta$  7.06 (d,  $J = 8.1$  Hz, 2H), 7.01 – 6.97 (m, 4H), 5.07 (dd,  $J = 18.3, 5.8$  Hz, 1H), 2.28 (s, 3H), 1.27 (s, 18H), 0.36 (s, 9H) ppm.  $^{13}\text{C}$  NMR (75 MHz,  $\text{CDCl}_3$ )  $\delta$  154.7, 140.7, 139.0, 132.5 (*app. d*,  $^3J = 4.4$  Hz), 129.5, 128.9, 124.8 (dd,  $^3J = 25.8, 26.0$  Hz), 124.0 (dd,  $^4J = 5.5, 5.4$  Hz), 119.9 (dd,  $^1J = 248.8, 249.1$  Hz), 55.9 (dd,  $^2J = 33.4, 30.0$  Hz), 35.2, 31.2, 21.2, 3.7 ppm.  $^{19}\text{F}$  NMR (282 MHz,  $\text{CDCl}_3$ )  $\delta$  -93.8 (d,  $J = 235.0$  Hz), -103.7 (d,  $J = 234.9$  Hz) ppm. HRMS (ESI)  $m/z$  Calcd for  $[\text{C}_{26}\text{H}_{38}\text{BrF}_2\text{OSi} + \text{H}]^+$  511.1838, found 511.1827.

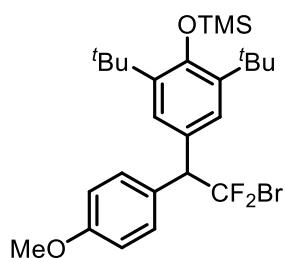

**(4-(2-bromo-2,2-difluoro-1-(4-methoxyphenyl)ethyl)-2,6-di-tert-butylphenoxy)trimethylsilane (2f)** Prepared through general procedure to give **2f** in 420.0 mg, 80% yield. White solid, m.p. 104 – 106 °C,  $R_f = 0.7$  (PE/EA = 50/1).  $^1\text{H}$  NMR (300 MHz,  $\text{CDCl}_3$ )  $\delta$  7.12 (d,  $J = 8.3$  Hz, 2H), 7.01 (s, 2H), 6.74 (d,  $J = 8.7$  Hz, 2H), 5.10 (dd,  $J = 18.1, 5.8$  Hz, 1H), 3.76 (s, 3H), 1.30 (d,  $J = 1.2$  Hz, 18H), 0.38 (d,  $J = 1.5$  Hz, 9H) ppm.  $^{13}\text{C}$  NMR (75 MHz,  $\text{CDCl}_3$ )  $\delta$  160.0, 154.6, 140.6, 130.8, 127.5 (*app. d*,  $^3J = 4.4$  Hz), 124.8 (d,  $^3J = 26.1, 26.2$  Hz), 123.9 (dd,  $^4J = 5.4, 5.5$  Hz), 119.9 (dd,  $^1J = 248.7, 248.3$  Hz), 113.5, 55.7 (dd,  $^2J = 31.4, 28.0$  Hz), 55.3, 35.2, 31.1, 3.7 ppm.  $^{19}\text{F}$  NMR (282 MHz,  $\text{CDCl}_3$ )  $\delta$  -93.5 (d,  $J = 235.0$  Hz), -103.8 (d,  $J = 235.0$  Hz). HRMS (ESI)  $m/z$  Calcd for  $[\text{C}_{26}\text{H}_{37}\text{BrF}_2\text{O}_2\text{Si} + \text{Na}]^+$  549.1606, found 549.1632.

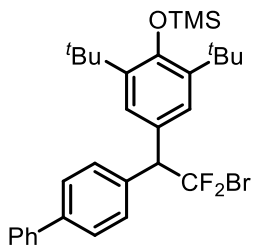

**(4-(1-([1,1'-biphenyl]-4-yl)-2-bromo-2,2-difluoroethyl)-2,6-di-tert-butylphenoxy)trimethylsilane (2g)** Prepared through general procedure to give **2g** in 571.3 mg, 90% yield, white solid, m.p. 73 – 75 °C,  $R_f = 0.7$  (PE/EA = 50/1).  $^1\text{H}$  NMR (300 MHz,  $\text{CDCl}_3$ )  $\delta$  7.51 – 7.47 (m, 2H), 7.44 – 7.38 (m, 4H), 7.36 – 7.30 (m, 1H), 7.28 – 7.24 (m, 2H), 7.03 (s, 2H), 5.16 (dd,  $J = 18.4, 5.5$  Hz, 1H), 1.26 (s, 18H), 0.36 (s, 9H) ppm.  $^{13}\text{C}$  NMR (75 MHz,  $\text{CDCl}_3$ )  $\delta$  154.7, 142.1, 140.8, 140.5, 134.4 (*app. d*,  $^3J = 4.3$  Hz), 130.1, 129.0, 127.7, 127.2, 127.0, 124.7 (dd,  $^3J = 25.7, 25.8$  Hz), 124.0 (dd,  $^4J = 5.3, 5.4$  Hz), 119.9 (dd,  $^1J = 249.1, 249.2$  Hz), 55.7 (dd,  $^2J = 33.7, 30.0$  Hz), 35.3, 31.2, 3.8 ppm.  $^{19}\text{F}$  NMR (282 MHz,  $\text{CDCl}_3$ )  $\delta$  -93.2 (d,  $J = 235.4$  Hz), -103.6 (d,  $J = 235.2$  Hz). HRMS (ESI)  $m/z$  Calcd for  $[\text{C}_{31}\text{H}_{39}\text{BrF}_2\text{OSi} + \text{Na}]^+$  595.1814, found 595.1810.

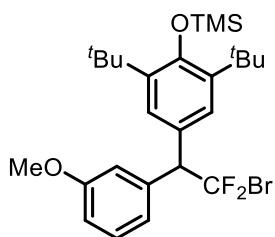

**(4-(2-bromo-2,2-difluoro-1-(3-methoxyphenyl)ethyl)-2,6-di-tert-butylphenoxy)trimethylsilane (2h)** Prepared through general procedure to give **2h** in 489.0 mg, 93% yield. White solid, m.p. 58 – 60 °C,  $R_f = 0.7$  (PE/EA = 50/1).  $^1\text{H NMR}$  (300 Hz,  $\text{CDCl}_3$ )  $\delta$  7.10 (t,  $J = 7.9$  Hz, 1H), 7.01 (s, 2H), 6.82 – 6.72 (m, 2H), 6.68 (s, 1H), 5.08 (dd,  $J = 18.1, 5.6$  Hz, 1H), 3.67 (s, 3H), 1.27 (s, 18H), 0.37 (s, 9H) ppm.  $^{13}\text{C NMR}$  (75 MHz,  $\text{CDCl}_3$ )  $\delta$  159.3, 154.7, 140.7, 136.7 (*app. d*,  $^3J = 4.4$  Hz), 129.2, 124.6 (dd,  $^3J = 25.9, 25.7$  Hz), 123.9 (dd,  $^4J = 5.4, 5.4$  Hz), 122.0, 119.9 (dd,  $^1J = 249.0, 249.2$  Hz), 115.1, 114.7, 55.8 (dd,  $^2J = 33.8, 29.8$  Hz), 55.2, 35.2, 31.2, 3.8 ppm.  $^{19}\text{F NMR}$  (282 MHz,  $\text{CDCl}_3$ )  $\delta$  -93.3 (d,  $J = 235.5$  Hz), -103.4 (d,  $J = 235.4$  Hz) ppm. HRMS (ESI)  $m/z$  Calcd for  $[\text{C}_{26}\text{H}_{37}\text{BrF}_2\text{O}_2\text{Si} + \text{Na}]^+$  549.1606, found 549.1609.

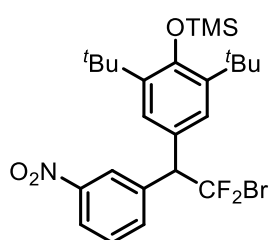

**(4-(2-bromo-2,2-difluoro-1-(3-nitrophenyl)ethyl)-2,6-di-tert-butylphenoxy)trimethylsilane (2i)** Prepared through general procedure to give **2i** in 481.6 mg, 89% yield. White solid, m.p. 78 – 80 °C,  $R_f = 0.7$  (PE/EA = 50/1).  $^1\text{H NMR}$  (300 Hz,  $\text{CDCl}_3$ )  $\delta$  8.15 – 8.11 (m, 1H), 7.99 – 7.98 (m, 1H), 7.65 (d,  $J = 7.8$  Hz, 1H), 7.45 (t,  $J = 8.0$  Hz, 1H), 7.04 (s, 2H), 5.25 (dd,  $J = 16.4, 6.4$  Hz, 1H), 1.28 (s, 18H), 0.36 (s, 9H) ppm.  $^{13}\text{C NMR}$  (75 MHz,  $\text{CDCl}_3$ )  $\delta$  155.1, 147.8, 141.2, 137.6 (*app. d*,  $^3J = 4.1$  Hz), 135.7, 129.3, 124.6, 123.9 (dd,  $^3J = 26.0, 26.0$  Hz), 123.7, 123.6 (*app. t*,  $^4J = 5.5$  Hz), 119.5 (dd,  $^1J = 249.6, 249.9$  Hz), 53.8 (dd,  $^2J = 34.9, 31.3$  Hz), 35.2, 31.1, 3.6 ppm.  $^{19}\text{F NMR}$  (282 MHz,  $\text{CDCl}_3$ )  $\delta$  -94.2 (d,  $J = 238.1$  Hz), -103.0 (d,  $J = 238.1$  Hz) ppm. HRMS (ESI)  $m/z$  Calcd for  $[\text{C}_{25}\text{H}_{34}\text{BrF}_2\text{NO}_3\text{Si} + \text{Na}]^+$  564.1352, found 564.1336.

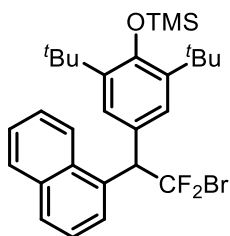

**(4-(2-bromo-2,2-difluoro-1-(naphthalen-1-yl)ethyl)-2,6-di-tert-butylphenoxy)trimethylsilane (2j)** Prepared through general procedure to give **2j** in 398.7 mg, 73% yield. White solid, m.p. 104 – 106 °C,  $R_f = 0.7$  (PE/EA = 50/1).  $^1\text{H NMR}$  (300 Hz,  $\text{CDCl}_3$ )  $\delta$  8.10 – 8.06 (m, 1H), 7.75 – 7.67 (m, 2H), 7.50 – 7.45 (m, 1H), 7.37 – 7.34 (m, 1H), 7.28 – 7.23 (m, 1H), 7.19 – 7.14 (m, 1H), 6.90 (s, 2H), 6.12 (dd,  $J = 20.1, 3.7$  Hz, 1H), 1.09 (s, 18H), 0.22 (s, 9H) ppm.  $^{13}\text{C NMR}$  (75 MHz,  $\text{CDCl}_3$ )  $\delta$  154.5, 140.5, 133.1, 131.5 (*app. d*,  $^3J = 5.1$  Hz), 130.7, 130.1 (*app. d*,  $^4J = 2.0$  Hz), 128.8, 126.6, 125.6, 125.3, 124.4 (dd,  $^3J = 25.8, 25.9$  Hz), 123.8 (dd,  $^4J = 5.4, 5.4$  Hz), 121.7, 119.7 (dd,  $^1J = 251.8, 249.5$  Hz), 50.0 (dd,  $^2J = 33.5, 28.3$  Hz), 35.0, 30.9, 3.9 ppm.  $^{19}\text{F NMR}$  (282 MHz,  $\text{CDCl}_3$ )  $\delta$  -91.9 (d,  $J = 231.3$  Hz), -105.4 (d,  $J = 231.2$  Hz) ppm. HRMS (ESI)  $m/z$  Calcd for  $[\text{C}_{29}\text{H}_{37}\text{BrF}_2\text{OSi} + \text{Na}]^+$  569.1657, found 569.1636.

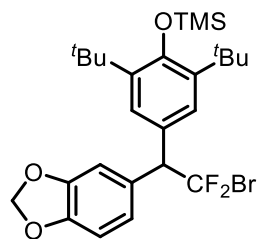

**(4-(1-(benzo[d][1,3]dioxol-5-yl)-2-bromo-2,2-difluoroethyl)-2,6-di-tert-butylphenoxy)trimethylsilane (2k)** Prepared through general procedure to give **2k** in 529.3 mg, 98% yield. White solid, m.p. 88 – 90 °C,  $R_f$  = 0.7 (PE/EA = 50/1).  $^1\text{H NMR}$  (300 Hz,  $\text{CDCl}_3$ )  $\delta$  7.04 (s, 2H), 6.79 – 6.78 (m, 1H), 6.61 – 6.56 (m, 2H), 5.90 (s, 2H), 5.05 (dd,  $J$  = 17.7, 5.9 Hz, 1H), 1.30 (s, 18H), 0.37 (s, 9H) ppm.  $^{13}\text{C NMR}$  (75 MHz,  $\text{CDCl}_3$ )  $\delta$  154.7, 148.2, 147.6, 140.8, 129.1 (*app. d.*,  $^3J$  = 4.3 Hz), 124.7 (dd,  $^3J$  = 25.9, 25.8 Hz), 123.9 (dd,  $^4J$  = 5.5, 5.4 Hz), 123.5, 119.9 (dd,  $^1J$  = 249.6, 248.9 Hz), 110.0, 107.6, 101.4, 55.9 (dd,  $^2J$  = 34.0, 30.0 Hz), 35.3, 31.2, 3.7 ppm.  $^{19}\text{F NMR}$  (282 MHz,  $\text{CDCl}_3$ )  $\delta$  -93.6 (d,  $J$  = 235.9 Hz), -103.1 (d,  $J$  = 236.0 Hz) ppm. HRMS (ESI)  $m/z$  Calcd for  $[\text{C}_{26}\text{H}_{35}\text{BrF}_2\text{O}_3\text{Si} + \text{H}]^+$  541.1580, found 541.1582.

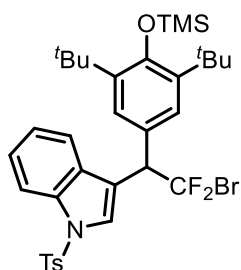

**3-(2-bromo-1-(3,5-di-tert-butyl-4-((trimethylsilyloxy)oxy)phenyl)-2,2-difluoroethyl)-1-tosyl-1H-indole (2l)** Prepared through general procedure to give **2l** in 592.7 mg, 86% yield. White solid, m.p. 64 – 66 °C,  $R_f$  = 0.7 (PE/EA = 50/1).  $^1\text{H NMR}$  (300 Hz,  $\text{CDCl}_3$ )  $\delta$  7.89 (d,  $J$  = 8.3 Hz, 1H), 7.73 (d,  $J$  = 8.1 Hz, 2H), 7.67 (s, 1H), 7.22 – 7.13 (m, 4H), 7.09 – 7.05 (m, 3H), 5.43 (dd,  $J$  = 17.7, 5.8 Hz, 1H), 2.25 (s, 3H), 1.16 (s, 18H), 0.35 (s, 9H) ppm.  $^{13}\text{C NMR}$  (75 MHz,  $\text{CDCl}_3$ )  $\delta$  154.8, 145.3, 140.8, 134.8, 134.5, 130.1, 128.6, 127.2, 126.9, 125.0, 124.4 (dd,  $^3J$  = 25.7, 25.8 Hz), 123.6 (dd,  $^4J$  = 5.1, 5.3 Hz), 123.4, 120.3 (dd,  $^1J$  = 248.4, 248.3 Hz), 117.1 (*app. d.*,  $^3J$  = 4.8 Hz), 113.4, 47.6 (dd,  $^2J$  = 36.4, 33.4 Hz), 35.0, 30.9, 21.6, 3.9 ppm.  $^{19}\text{F NMR}$  (282 MHz,  $\text{CDCl}_3$ )  $\delta$  -93.2 (d,  $J$  = 235.1 Hz), -101.1 (d,  $J$  = 235.0 Hz) ppm. HRMS (ESI)  $m/z$  Calcd for  $[\text{C}_{34}\text{H}_{42}\text{BrF}_2\text{NO}_3\text{SSi} + \text{Na}]^+$  712.1698, found 712.1686.

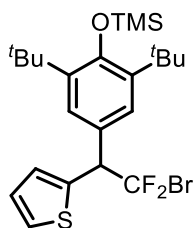

**(4-(2-bromo-2,2-difluoro-1-(thiophen-2-yl)ethyl)-2,6-di-tert-butylphenoxy)trimethylsilane (2m)** Prepared through general procedure to give **2m** in 215.9 mg, 43% yield. White solid, m.p. 72 – 74 °C,  $R_f$  = 0.7 (PE/EA = 50/1).  $^1\text{H NMR}$  (300 Hz,  $\text{CDCl}_3$ )  $\delta$  7.26 – 7.24 (m, 1H), 7.13 (s, 2H), 6.90 – 6.89 (m, 1H), 6.84 – 6.81 (m, 1H), 5.43 (dd,  $J$  = 17.6, 5.8 Hz, 1H), 1.31 (s, 18H), 0.36 (s, 9H) ppm.  $^{13}\text{C NMR}$  (75 MHz,  $\text{CDCl}_3$ )  $\delta$  154.9, 140.9, 138.0 (*app. d.*,  $^3J$  = 4.6 Hz), 129.2, 127.4, 126.5, 124.5 (dd,  $^3J$  = 25.9, 25.9 Hz), 123.8 (dd,  $^4J$  = 5.4, 5.4 Hz), 119.4 (dd,  $^1J$  = 249.0, 248.9 Hz), 50.3 (dd,  $^2J$  = 36.7, 32.3 Hz), 35.3, 31.3, 3.8 ppm.  $^{19}\text{F NMR}$  (282 MHz,  $\text{CDCl}_3$ )  $\delta$  -93.9 (d,  $J$  = 235.8 Hz), -103.5 (d,  $J$  = 235.6 Hz) ppm. HRMS (ESI)  $m/z$  Calcd for  $[\text{C}_{23}\text{H}_{33}\text{BrF}_2\text{OSSi} + \text{H}]^+$  503.1246, found 503.1267.

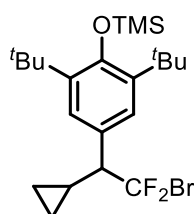

**(4-(2-bromo-1-cyclopropyl-2,2-difluoroethyl)-2,6-di-tert-butylphenoxy)trimethylsilane (2n)** Prepared through general procedure to give **2n** in 432.6 mg, 94% yield. White solid, m.p. 64 – 66 °C,  $R_f$  = 0.7 (PE/EA = 50/1).  $^1\text{H NMR}$  (300 Hz,  $\text{CDCl}_3$ )  $\delta$  7.37 (s, 2H), 3.63 – 3.53 (m, 1H), 1.41 (s, 18H), 1.24 – 1.15 (m, 1H), 0.75 – 0.55 (m, 2H),

0.41 (s, 9H), 0.36 – 0.28 (m, 1H), 0.13 – 0.04 (m, 1H) ppm.  $^{13}\text{C}$  NMR (75 MHz,  $\text{CDCl}_3$ )  $\delta$  154.8, 141.0, 125.7 (dd,  $^3J = 25.7, 25.6$  Hz), 123.8 (dd,  $^4J = 5.5, 5.7$  Hz), 120.4 (dd,  $^1J = 246.7, 246.9$  Hz), 61.9 (dd,  $^2J = 30.8, 30.8$  Hz), 35.4, 31.3, 15.0 (dd,  $^3J = 3.0, 2.9$  Hz), 10.4, 6.2, 3.8 ppm.  $^{19}\text{F}$  NMR (282 MHz,  $\text{CDCl}_3$ )  $\delta$  -90.9 (d,  $J = 239.5$  Hz), -103.3 (d,  $J = 239.5$  Hz) ppm. HRMS (ESI)  $m/z$  Calcd for  $[\text{C}_{22}\text{H}_{35}\text{BrF}_2\text{OSi} + \text{H}]^+$  461.1682, found 461.1688.

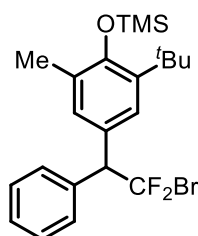

**(4-(2-bromo-2,2-difluoro-1-phenylethyl)-2-(tert-butyl)-6-methylphenoxy)trimethylsilane (2o)**

Prepared through general procedure to give **2o** in 445.0 mg, 98% yield. White solid, m.p. 72 – 74 °C,  $R_f = 0.7$  (PE/EA = 50/1).  $^1\text{H}$  NMR (300 MHz,  $\text{CDCl}_3$ )  $\delta$  7.31 – 7.17 (m, 5H), 6.95 (d,  $J = 1.5$  Hz, 1H), 6.76 (d,  $J = 1.6$  Hz, 1H), 5.12 (dd,  $J = 17.5, 6.5$  Hz, 1H), 2.19 (s, 3H), 1.19 (s, 9H), 0.32 (s, 9H) ppm.

$^{13}\text{C}$  NMR (75 MHz,  $\text{CDCl}_3$ )  $\delta$  154.6, 139.8, 135.3 (*app.* d,  $^3J = 4.0$  Hz), 129.8, 129.0, 128.3, 128.2, 126.9 (dd,  $^4J = 5.4, 5.4$  Hz), 125.4 (dd,  $^3J = 26.1, 26.1$  Hz), 123.8 (dd,  $^4J = 5.4, 5.2$  Hz), 119.8 (dd,  $^1J = 248.6, 248.7$  Hz), 55.8 (dd,  $^2J = 33.3, 30.5$  Hz), 34.8, 30.1, 20.1, 2.2 ppm.  $^{19}\text{F}$  NMR (282 MHz,  $\text{CDCl}_3$ )  $\delta$  -93.6 (d,  $J = 236.3$  Hz), -102.9 (d,  $J = 236.5$  Hz) ppm. HRMS (ESI)  $m/z$  Calcd for  $[\text{C}_{22}\text{H}_{29}\text{F}_2\text{OSi} + \text{H}]^+$  455.1212, found 455.1187.

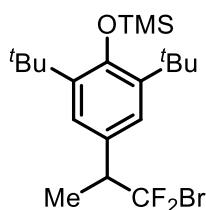

**(4-(1-bromo-1,1-difluoropropan-2-yl)-2,6-di-tert-butylphenoxy)trimethylsilane (2p)**

Prepared through general procedure to give **2p** in 412 mg, 95% yield. White solid, m.p. 62 – 64 °C,  $R_f = 0.6$  (PE).  $^1\text{H}$  NMR (300 MHz,  $\text{CDCl}_3$ )  $\delta$  7.35 (s, 2H), 4.42 – 4.27 (m, 1H), 1.67 (d,  $J = 7.0$  Hz, 3H), 1.41 (s, 18H), 0.41 (s, 9H) ppm.  $^{13}\text{C}$  NMR (75 MHz,  $\text{CDCl}_3$ )  $\delta$  154.8 (dd,  $^6J = 26.0, 26.0$  Hz), 140.9, 125.1 (dd,  $^3J = 26.3, 26.3$  Hz), 123.6 (dd,  $^4J = 5.8, 5.9$  Hz), 120.6 (dd,  $^1J = 246.5, 246.5$  Hz), 49.2 (dd,  $^2J = 33.1, 33.1$  Hz), 20.0 (dd,  $^3J = 2.5, 2.6$  Hz), 4.2, 4.0, 3.8, 3.4 ppm.  $^{19}\text{F}$  NMR (282 MHz,  $\text{CDCl}_3$ )  $\delta$  -96.1 (d,  $J = 240.1$  Hz), -103.5 (d,  $J = 240.1$  Hz) ppm. HRMS (ESI)  $m/z$  Calcd for  $[\text{C}_{20}\text{H}_{33}\text{BrF}_2\text{OSi} + \text{H}]^+$  435.1525, found 435.1528.

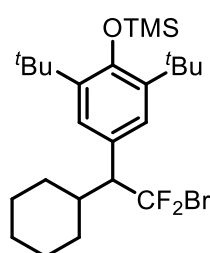

**(4-(2-bromo-1-cyclohexyl-2,2-difluoroethyl)-2,6-di-tert-butylphenoxy)trimethylsilane (2q)**

Prepared through general procedure to give **2q** in 402.0 mg, 80% yield. White solid, m.p. 96 – 98 °C,  $R_f = 0.5$  (PE).  $^1\text{H}$  NMR (300 MHz,  $\text{CDCl}_3$ )  $\delta$  7.33 (s, 2H), 4.14 (dd,  $J = 16.8, 11.0$  Hz, 1H), 1.79 – 1.54 (m, 4H), 1.46 – 1.41 (m, 21H), 1.29 – 1.07 (m, 4H), 0.40 (s, 9H).  $^{13}\text{C}$  NMR (75 MHz,  $\text{CDCl}_3$ ) 154.7, 141.1, 126.3 (dd,  $^3J = 26.0, 26.0$  Hz), 123.2 (dd,  $^4J = 5.8, 5.9$  Hz), 120.9 (dd,  $^1J = 247.0, 247.0$  Hz), 63.6 (dd,  $^2J = 29.0, 29.0$  Hz), 38.8 (*app.* d,  $^4J = 1.7$  Hz), 35.3, 32.2, 31.2, 28.1 (*app.* d,  $^4J = 1.6$  Hz), 26.2, 25.8 (*app.* d,  $^4J = 1.3$  Hz), 3.7 ppm.  $^{19}\text{F}$  NMR (282 MHz,  $\text{CDCl}_3$ )  $\delta$  -89.1 (d,  $J = 241.2$  Hz), -98.5 (d,  $J = 241.2$  Hz) ppm. HRMS (ESI)  $m/z$  Calcd for  $[\text{C}_{25}\text{H}_{41}\text{BrF}_2\text{OSi} + \text{Na}]^+$  525.1970, found 525.1967.

## 5. General Procedure for the Synthesis of Tetra-substituted Pyrrole/Furans

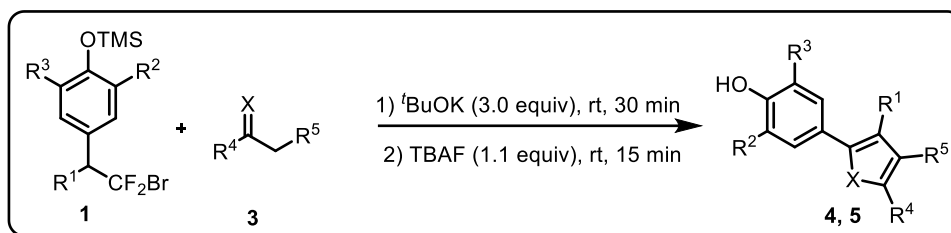

To an oven-dried 8-mL disposable culture tube equipped with a Teflon coated magnetic stir bar was added  $t\text{BuOK}$  (67.3 mg, 0.6 mmol, 3.0 equiv in 0.5 mL DCM), and **3** (0.4 mmol, 2.0 equiv in 0.5 mL DCM) under air, stirred for 30 min at ambient temperature, at which time TBAF (47.6 mg, 0.22 mmol, 1.1 equiv in 0.5 mL DCM) was added, and then put **1** (0.2 mmol in 0.5 mL DCM) into the reaction mixture stirred for 5-15 min at ambient temperature (monitored by TLC). After the starting material was completely consumed, saturated solution of  $\text{NH}_4\text{Cl}$  (5 mL) was slowly added to quench the reaction. The reaction mixture was extracted with DCM ( $3 \times 10$  mL). The organic layers were combined and dried over anhydrous  $\text{MgSO}_4$ . After removal of the solvent in vacuo, the residue was purified by flash chromatography on silica gel (PE/EA) to afford the corresponding product **4** or **5**.

## 6. Characterization of the Products of Tetra-substituted Pyrrole/Furans

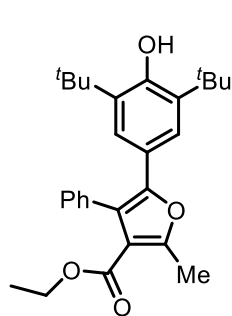

*ethyl* **5-(3,5-di-tert-butyl-4-hydroxyphenyl)-2-methyl-4-phenylfuran-3-carboxylate (4a)** Prepared through general procedure to give **4a** in 78.2 mg, 90% yield. White solid, m.p. 128 – 130 °C,  $R_f = 0.4$  (PE/EA = 50/1).  $^1\text{H NMR}$  (300 Hz,  $\text{CDCl}_3$ )  $\delta$  7.39 – 7.26 (m, 5H), 7.19 (s, 2H), 5.19 (s, 1H), 4.07 (q,  $J = 7.1$  Hz, 2H), 2.68 (s, 3H), 1.27 (s, 18H), 1.02 (t,  $J = 7.1$  Hz, 3H) ppm.  $^{13}\text{C NMR}$  (75 MHz,  $\text{CDCl}_3$ )  $\delta$  164.4, 157.5, 153.4, 148.5, 135.8, 134.7, 130.5, 128.2, 127.2, 122.7, 121.8, 120.3, 115.5, 59.8, 34.4, 30.2, 14.4, 13.9 ppm. HRMS (ESI)  $m/z$  Calcd for  $[\text{C}_{28}\text{H}_{34}\text{O}_4 + \text{H}]^+$  435.2530, found 435.2533.

### *ethyl* **5-(3,5-di-tert-butyl-4-hydroxyphenyl)-2-ethyl-4-phenylfuran-3-carboxylate (4b)**

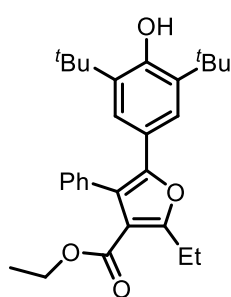

Prepared through general procedure to give **4b** in 81.6 mg, 91% yield. White solid, m.p. 114 – 116 °C,  $R_f = 0.4$  (PE/EA = 50/1).  $^1\text{H NMR}$  (300 Hz,  $\text{CDCl}_3$ )  $\delta$  7.39 – 7.27 (m, 5H), 7.20 (s, 2H), 5.20 (s, 1H), 4.07 (q,  $J = 7.1$  Hz, 2H), 3.10 (q,  $J = 7.5$  Hz, 2H), 1.36 (t,  $J = 7.5$  Hz, 3H), 1.28 (s, 18H), 1.01 (t,  $J = 7.1$  Hz, 3H) ppm.  $^{13}\text{C NMR}$  (75 MHz,  $\text{CDCl}_3$ )  $\delta$  164.3, 162.2, 153.4, 148.4, 135.7, 134.7, 10.5, 128.2, 127.1, 122.7, 121.9, 120.2, 114.6, 59.8, 34.3, 30.1, 21.7, 13.8, 12.6 ppm. HRMS (ESI)  $m/z$  Calcd for  $[\text{C}_{29}\text{H}_{36}\text{O}_4 + \text{H}]^+$  449.2686, found

449.2681.

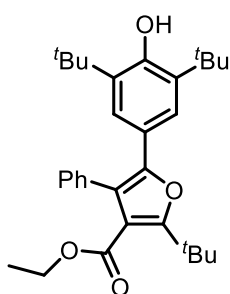

*ethyl* **2-(tert-butyl)-5-(3,5-di-tert-butyl-4-hydroxyphenyl)-4-phenylfuran-3-carboxylate (4c)** Prepared through general procedure to give **4c** in 52.4 mg, 55% yield. White solid, m.p. 110 – 112 °C,  $R_f = 0.4$  (PE/EA = 50/1).  $^1\text{H NMR}$  (300 Hz,  $\text{CDCl}_3$ )  $\delta$  7.38 – 7.26 (m, 5H), 7.22 (s, 2H), 5.20 (s, 1H), 4.03 (q,  $J = 7.1$  Hz, 2H), 1.48 (s, 9H), 1.28 (s, 18H), 0.93 (t,  $J = 7.1$  Hz, 3H) ppm.  $^{13}\text{C NMR}$  (75 MHz,  $\text{CDCl}_3$ )  $\delta$  165.4, 162.7, 153.4, 146.7, 135.8, 134.5, 130.2, 128.4, 127.2, 122.7, 122.0, 120.7, 115.4, 60.4, 34.6, 34.3, 30.1, 28.8, 13.7 ppm. HRMS (ESI)  $m/z$  Calcd for  $[\text{C}_{31}\text{H}_{40}\text{O}_4 + \text{H}]^+$  477.2999, found 477.2998.



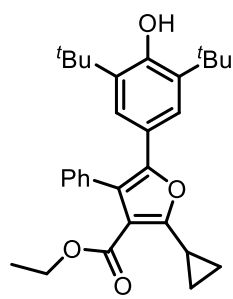

**ethyl 2-cyclopropyl-5-(3,5-di-tert-butyl-4-hydroxyphenyl)-4-phenylfuran-3-carboxylate (4d)** Prepared through general procedure to give **4d** in 82.9 mg, 90% yield. White solid, m.p. 118 – 120 °C,  $R_f = 0.4$  (PE/EA = 50/1).  $^1\text{H NMR}$  (300 Hz,  $\text{CDCl}_3$ )  $\delta$  7.39 – 7.27 (m, 5H), 7.11 (s, 2H), 5.19 (s, 1H), 4.08 (q,  $J = 7.1$  Hz, 2H), 2.90 – 2.81 (m, 1H), 1.26 (s, 18H), 1.21 – 1.17 (m, 2H), 1.13 – 1.07 (m, 2H), 1.00 (t,  $J = 7.1$  Hz, 3H) ppm.  $^{13}\text{C NMR}$  (75 MHz,  $\text{CDCl}_3$ )  $\delta$  164.7, 161.3, 153.3, 147.1, 135.7, 134.6, 130.4, 128.2, 127.1, 122.5, 121.8, 120.5, 115.1, 59.8, 34.3, 30.1, 13.9, 9.5, 8.8 ppm. HRMS (ESI)  $m/z$  Calcd for  $[\text{C}_{30}\text{H}_{36}\text{O}_4 + \text{H}]^+$  461.2686, found 461.2673.

**ethyl 2-cyclohexyl-5-(3,5-di-tert-butyl-4-hydroxyphenyl)-4-phenylfuran-3-carboxylate (4e)** Prepared through general procedure to give **4e** in 95.5 mg, 95% yield.

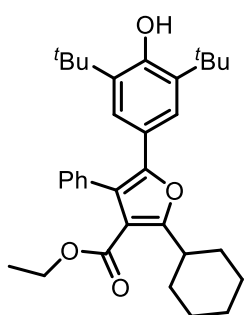

White solid, m.p. 138 – 140 °C,  $R_f = 0.4$  (PE/EA = 50/1).  $^1\text{H NMR}$  (300 Hz,  $\text{CDCl}_3$ )  $\delta$  7.39 – 7.26 (m, 5H), 7.20 (s, 2H), 5.19 (s, 1H), 4.05 (q,  $J = 7.1$  Hz, 2H), 3.51 – 3.41 (m, 1H), 2.03 – 1.97 (m, 2H), 2.03 – 1.97 (m, 2H), 1.78 – 1.63 (m, 3H), 1.50 – 1.34 (m, 3H), 1.28 (s, 1.28), 0.99 (t,  $J = 7.1$  Hz, 3H) ppm.  $^{13}\text{C NMR}$  (75 MHz,  $\text{CDCl}_3$ )  $\delta$  164.8, 164.4, 153.3, 148.1, 135.8, 134.8, 130.5, 128.2, 127.1, 122.7, 122.0, 120.0, 113.8, 59.7, 37.4, 34.3, 31.2, 30.1, 26.4, 26.1, 13.8 ppm. HRMS (ESI)  $m/z$  Calcd for  $[\text{C}_{33}\text{H}_{42}\text{O}_4 + \text{H}]^+$  503.3156, found 503.3156.

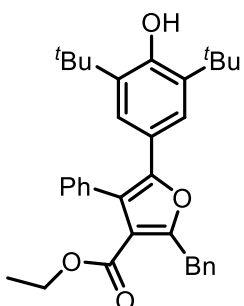

**ethyl 2-benzyl-5-(3,5-di-tert-butyl-4-hydroxyphenyl)-4-phenylfuran-3-carboxylate (4f)** Prepared through general procedure to give **4f** in 92.9 mg, 91% yield. White solid, m.p. 124 – 126 °C,  $R_f = 0.4$  (PE/EA = 50/1).  $^1\text{H NMR}$  (300 Hz,  $\text{CDCl}_3$ )  $\delta$  7.43 – 7.36 (m, 3H), 7.34 – 7.27 (m, 6H), 7.25 – 7.20 (m, 1H), 7.17 (s, 2H), 5.19 (s, 1H), 4.44 (s, 2H), 4.08 (q,  $J = 7.1$  Hz, 2H), 1.26 (s, 18H), 1.00 (t,  $J = 7.1$  Hz, 3H) ppm.  $^{13}\text{C NMR}$  (75 MHz,  $\text{CDCl}_3$ )  $\delta$  164.1, 158.4, 153.5, 149.1, 137.8, 135.8, 134.5, 130.5, 129.1, 128.6, 128.3, 127.2, 126.7, 122.8, 121.7, 120.2, 115.6, 60.00, 34.3, 34.1, 30.1, 13.9 ppm. HRMS (ESI)  $m/z$  Calcd for  $[\text{C}_{34}\text{H}_{38}\text{O}_4 + \text{H}]^+$  511.2843, found 511.2844.

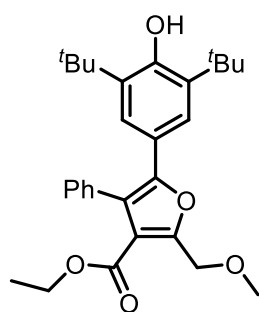

**ethyl 5-(3,5-di-tert-butyl-4-hydroxyphenyl)-2-(methoxymethyl)-4-phenylfuran-3-carboxylate (4g)** Prepared through general procedure to give **4g** in 86.5 mg, 93% yield. White solid, m.p. 112–114 °C,  $R_f = 0.4$  (PE/EA = 50/1).  $^1\text{H NMR}$  (300 Hz,  $\text{CDCl}_3$ )  $\delta$  7.41 – 7.28 (m, 5H), 7.23 (s, 2H), 5.24 (s, 1H), 4.82 (s, 2H), 4.44 (s, 2H), 4.10 (q,  $J = 7.1$  Hz, 2H), 3.50 (s, 3H), 1.27 (s, 18H), 1.03 (t,  $J = 7.1$  Hz, 3H) ppm.  $^{13}\text{C NMR}$  (75 MHz,  $\text{CDCl}_3$ )  $\delta$  163.6, 154.7, 153.8, 150.6, 135.8, 134.2, 130.5,

128.3, 127.3, 123.2, 121.4, 120.3, 118.6, 65.3, 60.2, 58.6, 34.3, 30.1, 13.8 ppm. HRMS (ESI)  $m/z$  Calcd for  $[C_{29}H_{36}O_5 + H]^+$  465.2636, found 465.2637.

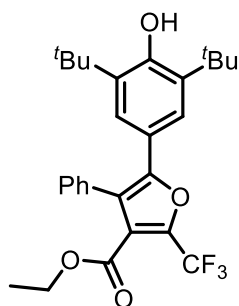

**ethyl 5-(3,5-di-tert-butyl-4-hydroxyphenyl)-4-phenyl-2-(trifluoromethyl)furan-3-carboxylate (4h)** Prepared through general procedure to give **4h** in 63.5 mg, 65% yield. White solid, m.p. 108 – 110 °C,  $R_f$  = 0.4 (PE/EA = 50/1).  $^1H$  NMR (300 Hz,  $CDCl_3$ )  $\delta$  7.43 – 7.30 (m, 5H), 7.25 (s, 2H), 5.35 (s, 1H), 4.18 (q,  $J$  = 7.1 Hz, 2H), 1.28 (s, 18H), 1.12 (t,  $J$  = 7.1 Hz, 3H) ppm.  $^{13}C$  NMR (75 MHz,  $CDCl_3$ )  $\delta$  161.5, 154.7, 152.0, 140.0 (q,  $^2J$  = 42.4 Hz), 136.0, 132.0, 130.3, 128.6, 128.0, 127.9, 123.6, 121.6 (q,  $^3J$  = 2.3 Hz), 120.8, 120.1, 119.1 (q,  $^1J$  = 268.9 Hz), 61.3, 34.3, 30.0, 13.6 ppm.  $^{19}F$  NMR (282 MHz,  $CDCl_3$ )  $\delta$  -61.5 ppm. HRMS (ESI)  $m/z$  Calcd for  $[C_{28}H_{31}F_3O_4 + H]^+$  489.2247, found 489.2244.

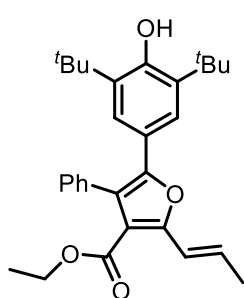

**ethyl (E)-5-(3,5-di-tert-butyl-4-hydroxyphenyl)-4-phenyl-2-(prop-1-en-1-yl)furan-3-carboxylate (4i)** Prepared through general procedure to give **4i** in 70.9 mg, 77% yield. White solid, m.p. 128 – 130 °C,  $R_f$  = 0.4 (PE/EA = 50/1).  $^1H$  NMR (300 Hz,  $CDCl_3$ )  $\delta$  7.40 – 7.28 (m, 5H), 7.23 (s, 2H), 7.03 (dd,  $J$  = 15.9, 1.8 Hz, 1H), 6.62 (dq,  $J$  = 15.8, 6.9 Hz, 1H), 5.22 (s, 1H), 4.07 (q,  $J$  = 7.1 Hz, 2H), 1.99 (dd,  $J$  = 6.9, 1.7 Hz, 3H), 1.28 (s, 18H), 1.00 (t,  $J$  = 7.1 Hz, 3H) ppm.  $^{13}C$  NMR (75 MHz,  $CDCl_3$ )  $\delta$  164.1, 154.9, 153.7, 148.9, 135.8, 134.5, 130.5, 130.4, 128.3, 127.2, 123.0, 121.7, 121.0, 119.5, 114.5, 60.0, 34.4, 30.1, 19.0, 13.8 ppm. HRMS (ESI)  $m/z$  Calcd for  $[C_{30}H_{36}O_4 + H]^+$  461.2686, found 461.2684.

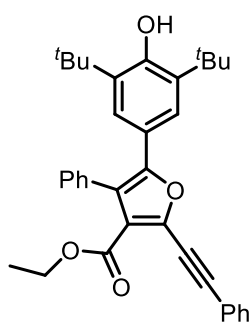

**ethyl 5-(3,5-di-tert-butyl-4-hydroxyphenyl)-4-phenyl-2-(phenylethynyl)furan-3-carboxylate (4j)** Prepared through general procedure to give **4j** in 98.9 mg, 95% yield. White solid, m.p. 96 – 98 °C,  $R_f$  = 0.4 (PE/EA = 50/1).  $^1H$  NMR (300 Hz,  $CDCl_3$ )  $\delta$  7.65 – 7.62 (m, 2H), 7.43 – 7.33 (m, 8H), 7.27 (s, 2H), 5.29 (s, 1H), 4.18 (q,  $J$  = 7.1 Hz, 2H), 1.28 (s, 18H), 1.14 (t,  $J$  = 7.1 Hz, 3H) ppm.  $^{13}C$  NMR (75 MHz,  $CDCl_3$ )  $\delta$  162.8, 154.2, 151.7, 138.3, 135.9, 133.4, 131.8, 130.5, 129.2, 128.6, 128.5, 127.7, 123.4, 123.2, 122.2, 121.2, 121.0, 97.9, 79.8, 60.5, 34.4, 30.1, 14.1 ppm. HRMS (ESI)  $m/z$  Calcd for  $[C_{35}H_{36}O_4 + H]^+$  521.2686, found 521.2667.

**ethyl 5-(3,5-di-tert-butyl-4-hydroxyphenyl)-2,4-diphenylfuran-3-carboxylate (4k)**

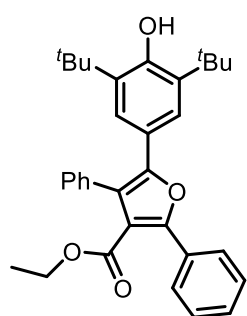

$[C_{33}H_{36}O_4 + H]^+$  497.2686, found 497.2687.

Prepared through general procedure to give **4k** in 71.5 mg, 72% yield. White solid, m.p. 121 – 123 °C,  $R_f = 0.4$  (PE/EA = 50/1).  $^1H$  NMR (300 Hz,  $CDCl_3$ )  $\delta$  7.94 – 7.91 (m, 2H), 7.48 – 7.42 (m, 2H), 7.41 – 7.32 (m, 6H), 7.30 (s, 2H), 5.26 (s, 1H), 4.06 (q,  $J = 7.1$  Hz, 2H), 1.29 (s, 18H), 0.92 (t,  $J = 7.1$  Hz, 3H) ppm.  $^{13}C$  NMR (75 MHz,  $CDCl_3$ )  $\delta$  164.6, 153.8, 153.7, 149.5, 135.9, 134.2, 130.4, 130.2, 128.9, 128.5, 128.4, 127.8, 127.4, 123.1, 121.8, 121.6, 116.8, 60.5, 34.4, 30.1, 13.6 ppm. HRMS (ESI)  $m/z$  Calcd for  $[C_{33}H_{36}O_4$

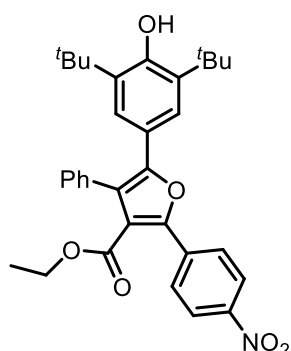

61.1, 34.4, 30.1, 13.6 ppm. HRMS (ESI)  $m/z$  Calcd for  $[C_{33}H_{35}NO_6 + H]^+$  542.2537, found 542.2537.

**ethyl 5-(3,5-di-tert-butyl-4-hydroxyphenyl)-2-(4-nitrophenyl)-4-phenylfuran-3-carboxylate (4l)**

Prepared through general procedure to give **4l** in 88.8 mg, 82% yield. White solid, m.p. 168 – 170 °C,  $R_f = 0.4$  (PE/EA = 50/1).  $^1H$  NMR (300 Hz,  $CDCl_3$ )  $\delta$  8.31 (d,  $J = 9.0$  Hz, 2H), 8.14 (d,  $J = 9.0$  Hz, 2H), 7.45 – 7.34 (m, 5H), 7.31 (s, 2H), 5.34 (s, 1H), 4.09 (q,  $J = 7.1$  Hz, 2H), 1.30 (s, 18H), 0.93 (t,  $J = 7.1$  Hz, 3H) ppm.  $^{13}C$  NMR (75 MHz,  $CDCl_3$ )  $\delta$  164.3, 154.4, 151.4, 150.2, 147.2, 136.1, 135.9, 133.5, 130.2, 128.6, 127.8 (two overlapping carbon signals), 123.9, 123.4, 122.5, 120.9, 119.9,

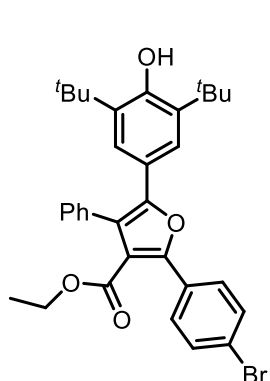

121.4, 117.3, 60.6, 34.4, 30.1, 13.6 ppm. HRMS (ESI)  $m/z$  Calcd for  $[C_{33}H_{35}BrO_4 + H]^+$  575.1791, found 575.1780.

**ethyl 2-(4-bromophenyl)-5-(3,5-di-tert-butyl-4-hydroxyphenyl)-4-phenylfuran-3-carboxylate (4m)** Prepared through general procedure to give **4m** in 102.4 mg, 89% yield. White solid, m.p. 118 – 120 °C,  $R_f = 0.4$  (PE/EA = 50/1).  $^1H$  NMR (300 Hz,  $CDCl_3$ )  $\delta$  7.83 (d,  $J = 8.7$  Hz, 2H), 7.58 (d,  $J = 8.7$  Hz, 2H), 7.43 – 7.33 (m, 5H), 7.28 (s, 2H), 5.26 (s, 1H), 4.05 (q,  $J = 7.1$  Hz, 2H), 1.29 (s, 18H), 0.91 (t,  $J = 7.1$  Hz, 3H) ppm.  $^{13}C$  NMR (75 MHz,  $CDCl_3$ )  $\delta$  164.4, 154.0, 152.5, 149.9, 136.0, 134.1, 131.6, 130.4, 129.3, 129.2, 128.5, 127.5, 123.1 (two overlapping carbon signals), 122.0,

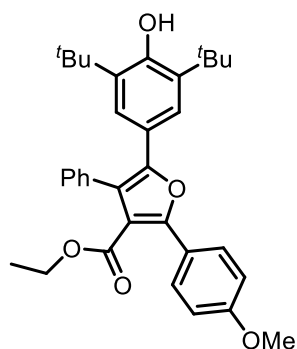

**ethyl 5-(3,5-di-tert-butyl-4-hydroxyphenyl)-2-(4-methoxyphenyl)-4-phenylfuran-3-carboxylate (4n)** Prepared through general procedure to give **4n** in 73.7 mg, 70% yield. White solid, m.p. 128 –130 °C,  $R_f = 0.4$  (PE/EA = 50/1).  $^1\text{H}$  NMR (300 Hz,  $\text{CDCl}_3$ )  $\delta$  7.91 (d,  $J = 8.6$  Hz, 2H), 7.44 – 7.32 (m, 5H), 7.28 (s, 2H), 6.99 (d,  $J = 8.7$  Hz, 2H), 5.23 (s, 1H), 4.04 (q,  $J = 7.1$  Hz, 2H), 3.87 (s, 3H), 1.30 (s, 18H), 0.92 (t,  $J = 7.1$  Hz, 3H) ppm.  $^{13}\text{C}$  NMR (75 MHz,  $\text{CDCl}_3$ )  $\delta$  164.7, 160.3, 154.3, 153.7, 149.0, 135.9, 134.5, 130.4, 129.5, 128.4, 127.3 (two overlapping carbon signals), 123.0 (two overlapping carbon signals), 121.7, 115.6, 113.8, 60.4, 55.5, 34.4, 30.2, 13.7 ppm. HRMS (ESI)  $m/z$  Calcd for  $[\text{C}_{34}\text{H}_{38}\text{O}_5 + \text{H}]^+$  527.2792, found 527.2795.

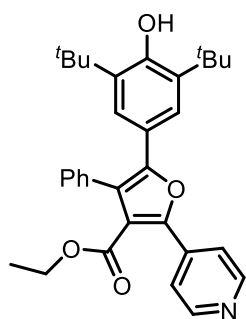

**ethyl 5-(3,5-di-tert-butyl-4-hydroxyphenyl)-4-phenyl-2-(pyridin-4-yl)furan-3-carboxylate (4o)** Prepared through general procedure to give **4o** in 87.6 mg, 88% yield. White solid, m.p. 155 – 157 °C,  $R_f = 0.4$  (PE/EA = 20/1).  $^1\text{H}$  NMR (300 Hz,  $\text{CDCl}_3$ )  $\delta$  8.71 – 8.69 (m, 2H), 7.87 – 7.85 (m, 2H), 7.45 – 7.35 (m, 2H), 7.32 (s, 2H), 5.48 (s, 1H), 4.10 (q,  $J = 7.1$  Hz, 2H), 1.31 (s, 18H), 0.94 (t,  $J = 7.1$  Hz, 3H) ppm.  $^{13}\text{C}$  NMR (75 MHz,  $\text{CDCl}_3$ )  $\delta$  164.2, 154.3, 151.1, 150.0, 149.5, 137.0, 136.1, 133.5, 130.2, 128.6, 127.7, 123.3, 122.3, 120.9, 120.8, 120.0, 61.0, 34.4, 30.1, 13.5 ppm. HRMS (ESI)  $m/z$  Calcd for  $[\text{C}_{32}\text{H}_{35}\text{NO}_4 + \text{H}]^+$  498.2639, found 498.2637.

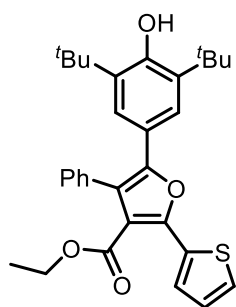

**ethyl 5-(3,5-di-tert-butyl-4-hydroxyphenyl)-4-phenyl-2-(thiophen-2-yl)furan-3-carboxylate (4p)** Prepared through general procedure to give **4p** in 78.4 mg, 78% yield. White solid, m.p. 150 – 152 °C,  $R_f = 0.4$  (PE/EA = 50/1).  $^1\text{H}$  NMR (300 Hz,  $\text{CDCl}_3$ )  $\delta$  8.00 – 7.99 (m, 1H), 7.43 – 7.40 (m, 2H), 7.38 – 7.33 (m, 4H), 7.29 (s, 2H), 7.15 – 7.12 (m, 1H), 5.26 (s, 1H), 4.08 (q,  $J = 7.1$  Hz, 2H), 1.29 (s, 18H), 0.92 (t,  $J = 7.1$  Hz, 3H) ppm.  $^{13}\text{C}$  NMR (75 MHz,  $\text{CDCl}_3$ )  $\delta$  164.1, 153.8, 150.3, 148.9, 135.9, 134.4, 132.1, 130.4, 128.4, 128.0, 127.5, 127.5, 127.4, 123.0, 121.6, 121.3, 115.0, 60.4, 34.4, 30.1, 13.6 ppm. HRMS (ESI)  $m/z$  Calcd for  $[\text{C}_{31}\text{H}_{34}\text{O}_4\text{S} + \text{H}]^+$  503.2251, found 503.2258.

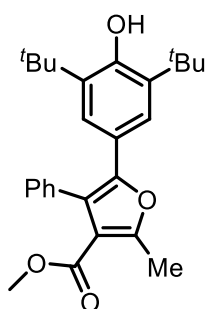

**methyl 5-(3,5-di-tert-butyl-4-hydroxyphenyl)-2-methyl-4-phenylfuran-3-carboxylate (4q)** Prepared through general procedure to give **4q** in 68.1 mg, 81% yield. White solid, m.p. 152 – 154 °C,  $R_f = 0.4$  (PE/EA = 50/1).  $^1\text{H}$  NMR (300 Hz,  $\text{CDCl}_3$ )  $\delta$  7.40 – 7.29 (m, 5H), 7.17 (s, 2H), 5.20 (s, 1H), 3.63 (s, 3H), 2.68 (s, 3H), 1.27 (s, 18H) ppm.  $^{13}\text{C}$  NMR (75 MHz,  $\text{CDCl}_3$ )  $\delta$  164.8, 157.6, 153.4, 148.7, 135.7, 134.4, 130.4, 128.3, 127.2, 122.8, 121.7, 120.3, 115.2, 51.1, 34.3, 30.1, 14.5 ppm. HRMS (ESI)  $m/z$  Calcd for  $[\text{C}_{27}\text{H}_{32}\text{O}_4 + \text{H}]^+$

421.2373, found 421.2372.

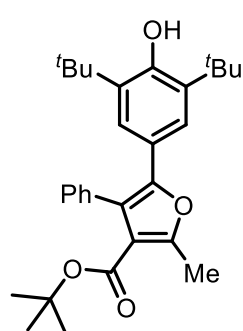

463.2841.

**tert-butyl 5-(3,5-di-tert-butyl-4-hydroxyphenyl)-2-methyl-4-phenylfuran-3-carboxylate (4r)** Prepared through general procedure to give **4r** in 87.0 mg, 94% yield. White solid, m.p. 178 – 180 °C,  $R_f = 0.4$  (PE/EA = 50/1).  $^1\text{H NMR}$  (300 Hz,  $\text{CDCl}_3$ )  $\delta$  7.39 – 7.33 (m, 2H), 7.31 – 7.25 (m, 3H), 7.18 (s, 2H), 5.17 (s, 1H), 2.65 (s, 3H), 1.27 (s, 18H), 1.22 (s, 9H) ppm.  $^{13}\text{C NMR}$  (75 MHz,  $\text{CDCl}_3$ )  $\delta$  163.8, 157.1, 153.3, 148.2, 135.7, 135.2, 130.4, 128.3, 127.0, 122.6, 122.0, 120.2, 116.9, 80.2, 34.4, 30.2, 28.0, 14.1 ppm. HRMS (ESI)  $m/z$  Calcd for  $[\text{C}_{30}\text{H}_{38}\text{O}_4 + \text{H}]^+$  463.2843, found

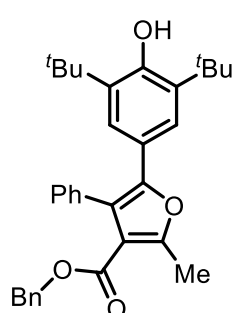

463.2841.

**benzyl 5-(3,5-di-tert-butyl-4-hydroxyphenyl)-2-methyl-4-phenylfuran-3-carboxylate (4s)** Prepared through general procedure to give **4s** in 86.4 mg, 87% yield. White solid, m.p. 136 – 138 °C,  $R_f = 0.4$  (PE/EA = 50/1).  $^1\text{H NMR}$  (300 Hz,  $\text{CDCl}_3$ )  $\delta$  7.37 – 7.29 (m, 5H), 7.24 – 7.21 (m, 3H), 7.17 (s, 2H), 6.99 – 6.96 (m, 2H), 5.19 (s, 1H), 5.09 (s, 2H), 2.68 (s, 3H), 1.27 (s, 18H) ppm.  $^{13}\text{C NMR}$  (75 MHz,  $\text{CDCl}_3$ )  $\delta$  164.2, 158.1, 153.4, 148.7, 135.9, 135.8, 134.6, 130.5, 128.5, 128.4, 127.8 (two overlapping carbon signals), 127.3, 122.7, 121.7, 120.0, 115.2, 65.8, 34.3, 30.1, 14.5 ppm. HRMS (ESI)  $m/z$  Calcd for  $[\text{C}_{33}\text{H}_{36}\text{O}_4 + \text{H}]^+$  497.2686, found 497.2690.

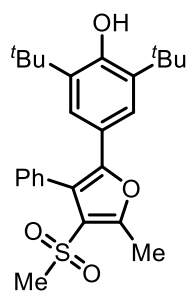

**2,6-di-tert-butyl-4-(5-methyl-4-(methylsulfonyl)-3-phenylfuran-2-yl)phenol (4t)** Prepared through general procedure to give **4t** in 64.3 mg, 73% yield. White solid, m.p. 190 – 192 °C,  $R_f = 0.4$  (PE/EA = 50/1).  $^1\text{H NMR}$  (300 Hz,  $\text{CDCl}_3$ )  $\delta$  7.44 – 7.38 (m, 5H), 7.14 (s, 2H), 5.26 (s, 1H), 2.73 (s, 3H), 2.70 (s, 3H), 1.27 (s, 18H) ppm.  $^{13}\text{C NMR}$  (75 MHz,  $\text{CDCl}_3$ )  $\delta$  155.2, 154.0, 149.8, 136.0, 131.7, 131.3, 129.0, 128.5, 123.1, 123.0, 120.8, 117.6, 44.7, 34.4, 30.1, 13.8 ppm. HRMS (ESI)  $m/z$  Calcd for  $[\text{C}_{26}\text{H}_{32}\text{O}_4\text{S} + \text{Na}]^+$  463.1914, found 463.1900.

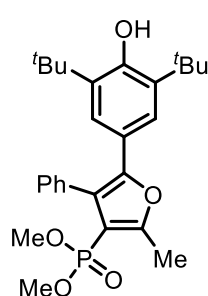

**Dimethyl 5-(3,5-di-tert-butyl-4-hydroxyphenyl)-2-methyl-4-phenylfuran-3-ylphosphonate (4u)** Prepared through general procedure to give **4u** in 43.2 mg, 46% yield. White solid, m.p. 168 – 170 °C,  $R_f = 0.4$  (PE/EA = 20/1).  $^1\text{H NMR}$  (300 Hz,  $\text{CDCl}_3$ )  $\delta$  7.38 – 7.31 (m, 5H), 7.16 (s, 2H), 5.23 (s, 1H), 3.54 (s, 3H), 3.50 (s, 3H), 2.68 (d,  $J = 2.2$  Hz, 3H), 1.27 (s, 18H) ppm.  $^{13}\text{C NMR}$  (75 MHz,  $\text{CDCl}_3$ )  $\delta$  160.0 (d,  $^2J = 26.9$  Hz), 153.5, 149.4 (d,  $^2J = 14.7$  Hz), 135.8, 133.9, 130.5, 128.4, 127.6, 122.9, 121.5, 121.1 (d,  $^2J = 12.0$  Hz), 108.6 (d,  $^1J = 212.0$  Hz), 52.1, 52.1, 34.4, 30.1, 14.1 ppm. HRMS (ESI)  $m/z$  Calcd for  $[\text{C}_{27}\text{H}_{35}\text{O}_5\text{P} + \text{H}]^+$  471.2295, found 471.2309.

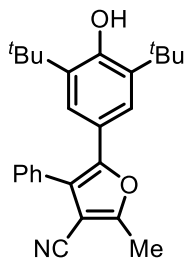

**5-(3,5-di-tert-butyl-4-hydroxyphenyl)-2-methyl-4-phenylfuran-3-carbonitrile (4v)** Prepared through general procedure to give **4v** in 67.4 mg, 87% yield. White solid, m.p. 148 – 150 °C,  $R_f = 0.4$  (PE/EA = 50/1).  $^1\text{H NMR}$  (300 Hz,  $\text{CDCl}_3$ )  $\delta$  7.44 – 7.33 (m, 5H), 7.26 (s, 2H), 5.31 (s, 1H), 2.58 (s, 3H), 1.31 (s, 18H) ppm.  $^{13}\text{C NMR}$  (75 MHz,  $\text{CDCl}_3$ )  $\delta$  159.8, 154.3, 149.7, 136.1, 131.4, 129.4, 129.0, 128.2, 123.4, 120.7, 120.0, 114.3, 97.9, 34.4, 30.2, 13.6 ppm. HRMS (ESI)  $m/z$  Calcd for  $[\text{C}_{26}\text{H}_{29}\text{NO}_2 + \text{Na}]^+$  410.2091, found 410.2083.

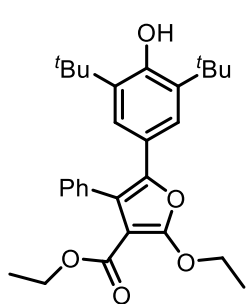

**ethyl 5-(3,5-di-tert-butyl-4-hydroxyphenyl)-2-ethoxy-4-phenylfuran-3-carboxylate (4w)** Prepared through general procedure to give **4w** in 53.0 mg, 57% yield. White solid, m.p. 112 – 114 °C,  $R_f = 0.4$  (PE/EA = 50/1).  $^1\text{H NMR}$  (300 Hz,  $\text{CDCl}_3$ )  $\delta$  7.40 – 7.29 (m, 5H), 7.11 (s, 2H), 5.17 (s, 1H), 4.56 (q,  $J = 7.1$  Hz, 2H), 4.06 (q,  $J = 7.1$  Hz, 2H), 1.55 (t,  $J = 7.1$  Hz, 3H), 1.27 (s, 18H), 1.01 (t,  $J = 7.1$  Hz, 3H) ppm.  $^{13}\text{C NMR}$  (75 MHz,  $\text{CDCl}_3$ )  $\delta$  163.4, 161.3, 153.1, 140.4, 135.9, 134.2, 130.4, 128.2, 127.3, 122.2, 121.6, 120.5, 94.8, 68.0, 59.6, 34.3, 30.1, 15.2, 14.0 ppm. HRMS (ESI)  $m/z$  Calcd for  $[\text{C}_{29}\text{H}_{36}\text{O}_5 + \text{H}]^+$  465.2636, found 465.2640.

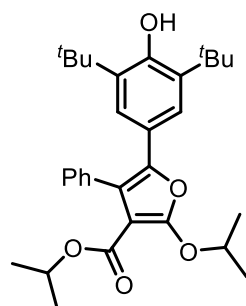

**isopropyl 5-(3,5-di-tert-butyl-4-hydroxyphenyl)-2-isopropoxy-4-phenylfuran-3-carboxylate (4x)** Prepared through general procedure to give **4x** in 62.1 mg, 63% yield, white solid, m.p. 110 – 112 °C,  $R_f = 0.4$  (PE/EA = 50/1).  $^1\text{H NMR}$  (300 Hz,  $\text{CDCl}_3$ )  $\delta$  7.44 – 7.25 (m, 5H), 7.13 (s, 2H), 5.16 (s, 1H), 5.05 – 4.91 (m, 2H), 1.52 (d,  $J = 6.2$  Hz, 6H), 1.27 (s, 18H), 1.01 (d,  $J = 6.3$  Hz, 6H) ppm.  $^{13}\text{C NMR}$  (75 MHz,  $\text{CDCl}_3$ )  $\delta$  162.9, 160.9, 153.0, 140.4, 135.8, 134.6, 130.5, 128.2, 122.2, 121.8, 120.4, 96.8, 77.1, 66.8, 34.4, 30.1, 22.6, 21.8 ppm. HRMS (ESI)  $m/z$  Calcd for  $[\text{C}_{31}\text{H}_{40}\text{O}_5 + \text{H}]^+$  493.2949, found 493.2945.

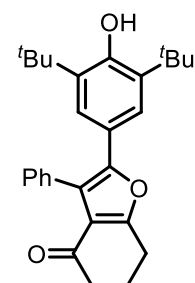

**2-(3,5-di-tert-butyl-4-hydroxyphenyl)-3-phenyl-6,7-dihydrobenzofuran-4(5H)-one (4y)** Prepared through general procedure to give **4y** in 45.2 mg, 54% yield. White solid, m.p. 190 – 192 °C,  $R_f = 0.4$  (PE/EA = 20/1).  $^1\text{H NMR}$  (300 Hz,  $\text{CDCl}_3$ )  $\delta$  7.37 – 7.29 (m, 5H), 7.21 (s, 2H), 5.24 (s, 1H), 2.99 (t,  $J = 6.2$  Hz, 2H), 2.49 (t,  $J = 6.3$  Hz, 2H), 2.25 – 2.17 (m, 2H), 1.29 (s, 18H) ppm.  $^{13}\text{C NMR}$  (75 MHz,  $\text{CDCl}_3$ )  $\delta$  194.3, 165.6, 153.8, 150.4, 135.9, 132.9, 130.3, 128.3, 127.4, 123.4, 121.4 (two overlapping carbon signals), 117.8, 38.7, 34.4, 30.2, 23.9, 22.6 ppm. HRMS (ESI)  $m/z$  Calcd for  $[\text{C}_{28}\text{H}_{32}\text{O}_3 + \text{H}]^+$  417.2424, found 417.2426.

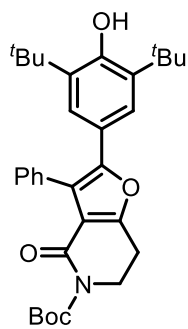

540.2710.

**tert-butyl 2-(3,5-di-tert-butyl-4-hydroxyphenyl)-4-oxo-3-phenyl-6,7-dihydrofuro[3,2-c]pyridine-5(4H)-carboxylate (4z)** Prepared through general procedure to give **4z** in 83.7 mg, 81% yield. White solid, m.p. 98 – 100 °C,  $R_f = 0.4$  (PE/EA = 20/1).  $^1\text{H NMR}$  (300 Hz,  $\text{CDCl}_3$ )  $\delta$  7.43 – 7.28 (m, 5H), 7.19 (s, 2H), 5.26 (s, 1H), 4.15 (t,  $J = 6.4$  Hz, 2H), 3.05 (t,  $J = 6.4$  Hz, 2H), 1.51 (s, 9H), 1.28 (s, 18H) ppm.  $^{13}\text{C NMR}$  (75 MHz,  $\text{CDCl}_3$ )  $\delta$  161.4, 159.6, 153.8, 153.3, 151.1, 135.8, 132.4, 130.5, 128.4, 127.5, 123.2, 121.3, 119.3, 116.8, 82.9, 44.4, 34.3, 30.1, 28.2, 23.8 ppm. HRMS (ESI)  $m/z$  Calcd for  $[\text{C}_{32}\text{H}_{39}\text{NO}_5 + \text{Na}]^+$  540.2720, found

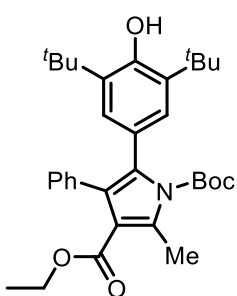

127.0, 126.9, 126.0, 125.2, 124.0, 114.8, 84.3, 59.7, 34.2, 30.3, 27.4, 13.9, 13.2 ppm. HRMS (ESI)  $m/z$  Calcd for  $[\text{C}_{33}\text{H}_{43}\text{NO}_5 + \text{Na}]^+$  556.3033, found 556.3018.

**1-(tert-butyl) 3-ethyl 5-(3,5-di-tert-butyl-4-hydroxyphenyl)-2-methyl-4-phenyl-1H-pyrrole-1,3-dicarboxylate (4aa)** Prepared through general procedure to give **4aa** in 66.1 mg, 62% yield. White solid, m.p. 172 – 174 °C,  $R_f = 0.5$  (PE/EA = 20/1).  $^1\text{H NMR}$  (300 Hz,  $\text{CDCl}_3$ )  $\delta$  7.18 – 7.11 (m, 3H), 7.08 – 7.05 (m, 2H), 6.86 (s, 2H), 5.10 (s, 1H), 4.05 (q,  $J = 7.1$  Hz, 2H), 2.75 (s, 3H), 1.30 (s, 18H), 1.22 (s, 9H), 0.96 (t,  $J = 7.1$  Hz, 3H) ppm.  $^{13}\text{C NMR}$  (75 MHz,  $\text{CDCl}_3$ )  $\delta$  165.6, 153.0, 150.0, 136.7, 135.4, 135.0, 132.3, 130.8,

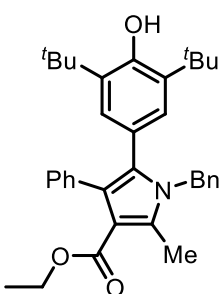

129.0, 127.9, 127.3, 127.1, 125.6, 125.5, 123.3, 122.1, 111.6, 59.4, 48.1, 34.2, 30.1, 14.0, 11.9 ppm. HRMS (ESI)  $m/z$  Calcd for  $[\text{C}_{35}\text{H}_{41}\text{NO}_3 + \text{H}]^+$  524.3159, found 524.3167.

**ethyl 1-benzyl-5-(3,5-di-tert-butyl-4-hydroxyphenyl)-2-methyl-4-phenyl-1H-pyrrole-3-carboxylate (4ab)** Prepared through general procedure to give **4ab** in 48.1 mg, 46% yield. White solid, m.p. 130 – 132 °C,  $R_f = 0.4$  (PE/EA = 50/1).  $^1\text{H NMR}$  (300 Hz,  $\text{CDCl}_3$ )  $\delta$  7.37 – 7.28 (m, 3H), 7.19 – 7.11 (m, 5H), 7.03 – 7.01 (m, 2H), 6.72 (s, 2H), 5.10 (s, 2H), 5.08 (s, 1H), 4.10 (q,  $J = 7.1$  Hz, 2H), 2.51 (s, 3H), 1.11 (s, 18H), 1.03 (t,  $J = 7.1$  Hz, 3H) ppm.  $^{13}\text{C NMR}$  (75 MHz,  $\text{CDCl}_3$ )  $\delta$  166.2, 153.2, 138.3, 136.7, 135.7, 135.3, 133.4, 131.0,

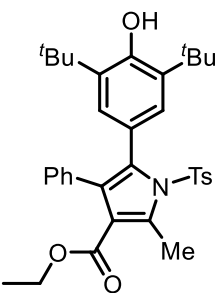

130.1, 129.9, 129.4, 127.3, 127.1, 126.8, 126.1, 120.8, 117.2, 60.3, 34.1, 30.3, 21.8, 14.4, 13.8 ppm. HRMS (ESI)  $m/z$  Calcd for  $[\text{C}_{35}\text{H}_{41}\text{NO}_5\text{S} + \text{H}]^+$  588.2778, found 588.2779.

**ethyl 5-(3,5-di-tert-butyl-4-hydroxyphenyl)-2-methyl-4-phenyl-1-tosyl-1H-pyrrole-3-carboxylate (4ac)** Prepared through general procedure to give **4ac** in 49.3 mg, 42% yield. White solid, m.p. 183 – 185 °C,  $R_f = 0.4$  (PE/EA = 50/1).  $^1\text{H NMR}$  (300 Hz,  $\text{CDCl}_3$ )  $\delta$  7.20 – 7.17 (m, 2H), 7.07 – 7.04 (m, 5H), 6.88 – 6.84 (m, 2H), 6.63 (s, 2H), 5.13 (s, 1H), 4.04 (q,  $J = 7.1$  Hz, 2H), 2.93 (s, 3H), 2.33 (s, 3H), 1.23 (s, 18H), 0.92 (t,  $J = 7.1$  Hz, 3H) ppm.  $^{13}\text{C NMR}$  (75 MHz,  $\text{CDCl}_3$ )  $\delta$  165.5, 153.6, 144.5, 138.2, 136.7, 134.7, 134.2, 134.1,

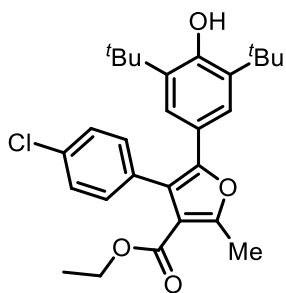

**ethyl 4-(4-chlorophenyl)-5-(3,5-di-tert-butyl-4-hydroxyphenyl)-2-methylfuran-3-carboxylate (5a)** Prepared through general procedure to give **5a** in 76.8 mg, 82% yield. White solid, m.p. 130 – 132 °C,  $R_f = 0.4$  (PE/EA = 50/1).  $^1\text{H}$  NMR (300 Hz,  $\text{CDCl}_3$ )  $\delta$  7.37 – 7.34 (m, 2H), 7.27 – 7.24 (m, 2H), 7.15 (s, 2H), 5.23 (s, 1H), 4.10 (q,  $J = 7.1$  Hz, 2H), 2.68 (s, 3H), 1.29 (s, 18H), 1.08 (t,  $J = 7.2$  Hz, 3H) ppm.  $^{13}\text{C}$  NMR (75 MHz,  $\text{CDCl}_3$ )  $\delta$  164.2, 157.8, 153.6, 148.8, 135.9, 133.2, 133.2, 132.0, 128.4, 122.8, 121.5, 119.0, 115.2, 60.0, 34.4, 30.1, 14.4, 14.0 ppm. HRMS (ESI)  $m/z$  Calcd for  $[\text{C}_{28}\text{H}_{33}\text{ClO}_4 + \text{H}]^+$  469.2140, found 469.2149.

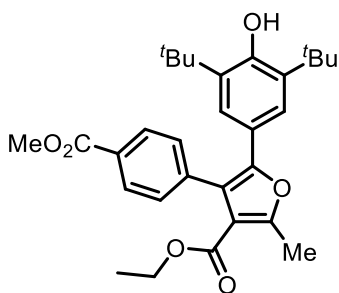

**ethyl 5-(3,5-di-tert-butyl-4-hydroxyphenyl)-4-(4-methoxycarbonylphenyl)-2-methylfuran-3-carboxylate (5b)** Prepared through general procedure to give **5b** in 94.5 mg, 96% yield. White solid, m.p. 110 – 112 °C,  $R_f = 0.4$  (PE/EA = 50/1).  $^1\text{H}$  NMR (300 Hz,  $\text{CDCl}_3$ )  $\delta$  8.06 (d,  $J = 8.4$  Hz, 2H), 7.40 (d,  $J = 8.4$  Hz, 2H), 7.15 (s, 2H), 5.24 (s, 1H), 4.07 (q,  $J = 7.1$  Hz, 2H), 3.94 (s, 3H), 2.69 (s, 3H), 1.27 (s, 18H), 1.03 (t,  $J = 7.1$  Hz, 3H) ppm.  $^{13}\text{C}$  NMR (75 MHz,  $\text{CDCl}_3$ )  $\delta$  167.2, 164.1, 157.9, 153.7, 148.8, 140.0, 135.9, 130.7, 129.5, 128.8, 122.8, 121.3, 119.2, 115.2, 60.0, 52.2, 34.4, 30.1, 14.4, 14.0 ppm. HRMS (ESI)  $m/z$  Calcd for  $[\text{C}_{30}\text{H}_{36}\text{O}_6 + \text{H}]^+$  493.2585, found 493.2583.

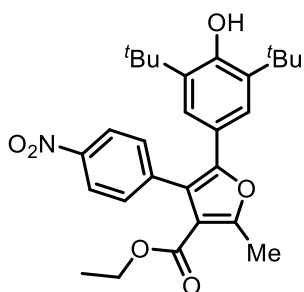

**ethyl 5-(3,5-di-tert-butyl-4-hydroxyphenyl)-2-methyl-4-(4-nitrophenyl)furan-3-carboxylate (5c)** Prepared through general procedure to give **5c** in 70.9 mg, 74% yield. White solid, m.p. 118 – 120 °C,  $R_f = 0.4$  (PE/EA = 50/1).  $^1\text{H}$  NMR (300 Hz,  $\text{CDCl}_3$ )  $\delta$  8.25 (d,  $J = 8.6$  Hz, 2H), 7.51 (d,  $J = 8.6$  Hz, 2H), 7.09 (s, 2H), 5.28 (s, 1H), 4.12 (q,  $J = 7.1$  Hz, 2H), 2.70 (s, 3H), 1.27 (s, 18H), 1.09 (t,  $J = 7.2$  Hz, 3H) ppm.  $^{13}\text{C}$  NMR (75 MHz,  $\text{CDCl}_3$ )  $\delta$  163.8, 158.3, 154.0, 149.4, 147.0, 142.3, 136.1, 131.8, 123.4, 123.1, 120.8, 118.1, 114.9, 60.2, 34.4, 30.1, 14.5, 14.1 ppm. HRMS (ESI)  $m/z$  Calcd for  $[\text{C}_{28}\text{H}_{33}\text{NO}_6 + \text{Na}]^+$  502.2200, found 502.2215.

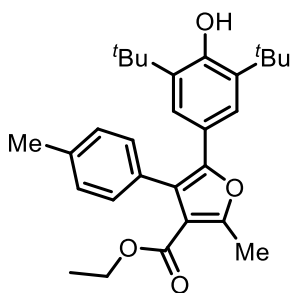

**ethyl 5-(3,5-di-tert-butyl-4-hydroxyphenyl)-2-methyl-4-(p-tolyl)furan-3-carboxylate (5d)** Prepared through general procedure to give **5d** in 75.3 mg, 84% yield, white solid, m.p. 116 – 118 °C,  $R_f = 0.4$  (PE/EA = 50/1).  $^1\text{H}$  NMR (300 Hz,  $\text{CDCl}_3$ )  $\delta$  7.23 – 7.18 (m, 6H), 5.18 (s, 1H), 4.10 (q,  $J = 7.1$  Hz, 2H), 2.67 (s, 3H), 2.36 (s, 3H), 1.28 (s, 18H), 1.07 (t,  $J = 7.1$  Hz, 3H) ppm.  $^{13}\text{C}$  NMR (75 MHz,  $\text{CDCl}_3$ )  $\delta$  164.4, 157.3, 153.3, 148.5, 136.7, 135.7, 131.5, 130.3, 128.9, 122.6, 121.9, 120.3, 115.5, 59.8, 34.4, 30.1, 21.3, 14.4, 14.0 ppm. HRMS (ESI)  $m/z$  Calcd for  $[\text{C}_{29}\text{H}_{36}\text{O}_4 + \text{H}]^+$  449.2686, found 449.2688.



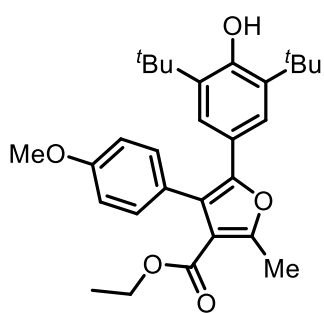

**ethyl 5-(3,5-di-tert-butyl-4-hydroxyphenyl)-4-(4-methoxyphenyl)-2-methylfuran-3-carboxylate (5e)** Prepared through general procedure to give **5e** in 86.5 mg, 93% yield. White solid, m.p. 103 – 105 °C,  $R_f = 0.4$  (PE/EA = 50/1).  $^1\text{H}$  NMR (300 MHz,  $\text{CDCl}_3$ )  $\delta$  7.25 – 7.20 (m, 4H), 6.93 – 6.90 (m, 2H), 5.18 (s, 1H), 4.10 (q,  $J = 7.1$  Hz, 2H), 3.83 (s, 3H), 2.67 (s, 3H), 1.29 (s, 18H), 1.09 (t,  $J = 7.1$  Hz, 3H) ppm.  $^{13}\text{C}$  NMR (75 MHz,  $\text{CDCl}_3$ )  $\delta$  164.4, 158.9, 157.3, 153.3, 148.6, 135.7, 131.6, 126.8, 122.7, 121.9, 119.9, 115.5, 113.8, 59.8, 55.5, 34.4, 30.1, 14.4, 14.0 ppm. HRMS (ESI)  $m/z$  Calcd for  $[\text{C}_{29}\text{H}_{36}\text{O}_5 + \text{H}]^+$  465.2636, found 465.2621

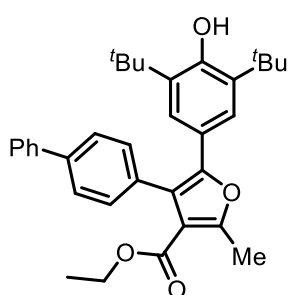

**ethyl 4-([1,1'-biphenyl]-4-yl)-5-(3,5-di-tert-butyl-4-hydroxyphenyl)-2-methylfuran-3-carboxylate (5f)** Prepared through general procedure to give **5f** in 76.5 mg, 75% yield. White solid, m.p. 108 – 110 °C,  $R_f = 0.4$  (PE/EA = 50/1).  $^1\text{H}$  NMR (300 Hz,  $\text{CDCl}_3$ )  $\delta$  7.62 – 7.58 (m, 4H), 7.49 – 7.42 (m, 2H), 7.41 – 7.34 (m, 3H), 7.22 (s, 2H), 5.20 (s, 1H), 4.11 (q,  $J = 7.1$  Hz, 2H), 2.70 (s, 3H), 1.28 (s, 18H), 1.07 (t,  $J = 7.1$  Hz, 3H) ppm.  $^{13}\text{C}$  NMR (75 MHz,  $\text{CDCl}_3$ )  $\delta$  164.4, 157.6, 153.5, 148.7, 141.5, 140.2, 135.8, 133.8, 130.9, 128.9, 127.2 (two overlapping carbon signals), 127.1, 122.7, 121.8, 119.9, 115.4, 59.9, 34.4, 30.1, 14.4, 14.0 ppm. HRMS (ESI)  $m/z$  Calcd for  $[\text{C}_{34}\text{H}_{38}\text{O}_4 + \text{H}]^+$  511.2843, found 511.2838.

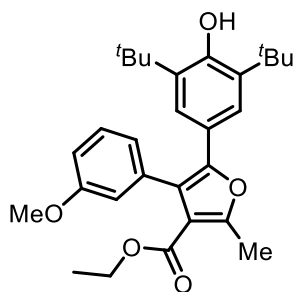

**ethyl 5-(3,5-di-tert-butyl-4-hydroxyphenyl)-4-(3-methoxyphenyl)-2-methylfuran-3-carboxylate (5g)** Prepared through general procedure to give **5g** in 77.1 mg, 83% yield. White solid, m.p. 90 – 92 °C,  $R_f = 0.4$  (PE/EA = 50/1).  $^1\text{H}$  NMR (300 Hz,  $\text{CDCl}_3$ )  $\delta$  7.31 – 7.23 (m, 3H), 6.92 – 6.86 (m, 3H), 5.21 (s, 1H), 4.09 (q,  $J = 7.1$  Hz, 2H), 3.77 (s, 3H), 2.68 (s, 3H), 1.29 (s, 18H), 1.04 (t,  $J = 7.1$  Hz, 3H) ppm.  $^{13}\text{C}$  NMR (75 MHz,  $\text{CDCl}_3$ )  $\delta$  164.4, 159.6, 157.4, 153.4, 148.4, 136.0, 135.8, 129.3, 123.0, 122.6, 121.7, 120.0, 115.8, 115.5, 113.0, 59.8, 55.4, 34.4, 30.1, 14.4, 13.9 ppm. HRMS (ESI)  $m/z$  Calcd for  $[\text{C}_{29}\text{H}_{36}\text{O}_5 + \text{H}]^+$  465.2636, found 465.2610.

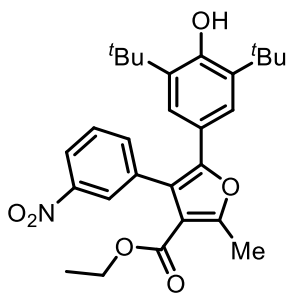

**ethyl 5-(3,5-di-tert-butyl-4-hydroxyphenyl)-2-methyl-4-(3-nitrophenyl)furan-3-carboxylate (5h)** Prepared through general procedure to give **5h** in 79.5 mg, 83% yield. White solid, m.p. 108 – 110 °C,  $R_f = 0.4$  (PE/EA = 50/1).  $^1\text{H}$  NMR (300 Hz,  $\text{CDCl}_3$ )  $\delta$  8.24 – 8.18 (m, 2H), 7.69 – 7.65 (m, 1H), 7.55 (t,  $J = 7.8$  Hz, 1H), 7.12 (s, 2H), 5.26 (s, 1H), 4.10 (q,  $J = 7.1$  Hz, 2H), 2.70 (s, 3H), 1.27 (s, 18H), 1.06 (t,  $J = 7.1$  Hz, 3H) ppm.  $^{13}\text{C}$  NMR (75 MHz,  $\text{CDCl}_3$ )  $\delta$  163.9, 158.3, 154.0, 149.5, 148.2, 137.2, 136.7, 136.1, 129.0, 125.9, 123.0, 122.1, 120.9, 117.7, 115.0, 60.1, 34.4, 30.1,

14.5, 14.0 ppm. HRMS (ESI)  $m/z$  Calcd for  $[C_{28}H_{33}NO_6 + H]^+$  480.2381, found 480.2380.

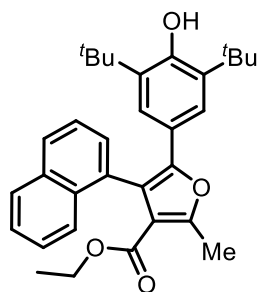

**ethyl 5-(3,5-di-tert-butyl-4-hydroxyphenyl)-2-ethyl-4-(naphthalen-1-yl)furan-3-carboxylate (5i)** Prepared through general procedure to give **5i** in 72.6 mg, 75% yield. White solid, m.p. 148 – 150 °C,  $R_f$  = 0.4 (PE/EA = 50/1).  $^1H$  NMR (300 Hz,  $CDCl_3$ )  $\delta$  7.88 – 7.82 (m, 2H), 7.74 – 7.71 (m, 1H), 7.49 – 7.41 (m, 2H), 7.39 – 7.33 (m, 2H), 7.08 (s, 2H), 5.12 (s, 1H), 3.86 – 3.75 (m, 2H), 2.76 (s, 3H), 1.11 (s, 18H), 0.52 (t,  $J$  = 7.1 Hz, 3H) ppm.  $^{13}C$  NMR (75 MHz,  $CDCl_3$ )  $\delta$  164.3, 157.9, 153.4, 149.1, 135.8, 133.8, 133.3, 132.8, 128.1, 127.7 (two overlapping carbon signals), 126.2, 126.1, 125.7, 125.6, 122.3, 121.7, 117.7, 116.5, 59.5, 34.2, 30.0, 14.3, 13.2 ppm. HRMS (ESI)  $m/z$  Calcd for  $[C_{32}H_{36}O_4 + H]^+$  485.2686, found 485.2681.

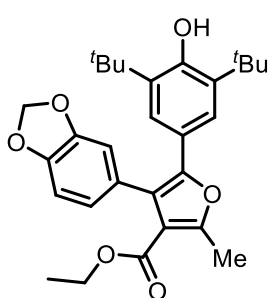

**ethyl 4-(benzo[d][1,3]dioxol-5-yl)-5-(3,5-di-tert-butyl-4-hydroxyphenyl)-2-methylfuran-3-carboxylate (5j)** Prepared through general procedure to give **5j** in 84.2 mg, 88% yield. White solid, m.p. 98 – 100 °C,  $R_f$  = 0.4 (PE/EA = 50/1).  $^1H$  NMR (300 Hz,  $CDCl_3$ )  $\delta$  7.23 (s, 2H), 6.90 – 6.73 (m, 3H), 5.95 (s, 2H), 5.21 (s, 1H), 4.13 (q,  $J$  = 7.2 Hz, 2H), 2.66 (s, 18H), 1.32 (s, 3H), 1.13 (t,  $J$  = 7.1 Hz, 1H) ppm.  $^{13}C$  NMR (75 MHz,  $CDCl_3$ )  $\delta$  164.3, 157.4, 153.4, 148.7, 147.5, 146.7, 135.8, 128.1, 123.9, 122.7, 121.8, 119.8, 115.5, 111.2, 108.4, 101.0, 59.9, 34.4, 30.2, 14.5, 14.1 ppm. HRMS (ESI)  $m/z$  Calcd for  $[C_{29}H_{34}O_6 + H]^+$  479.2428, found 479.2424.

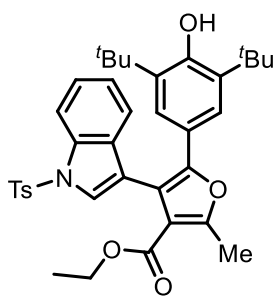

**ethyl 5-(3,5-di-tert-butyl-4-hydroxyphenyl)-2-methyl-4-(1-tosyl-1H-indol-3-yl)furan-3-carboxylate (5k)** Prepared through general procedure to give **5k** in 80.3 mg, 64% yield, white solid, m.p. 100 – 102 °C,  $R_f$  = 0.4 (PE/EA = 50/1).  $^1H$  NMR (300 Hz,  $CDCl_3$ )  $\delta$  8.03 (d,  $J$  = 8.3 Hz, 1H), 7.84 (d,  $J$  = 8.1 Hz, 2H), 7.57 (s, 1H), 7.32 – 7.26 (m, 1H), 7.23 – 7.08 (m, 6H), 5.18 (s, 1H), 3.90 (q,  $J$  = 7.1 Hz, 2H), 2.70 (s, 3H), 2.33 (s, 3H), 1.10 (s, 18H), 0.65 (t,  $J$  = 7.1 Hz, 3H) ppm.  $^{13}C$  NMR (75 MHz,  $CDCl_3$ )  $\delta$  164.1, 158.1, 153.6, 150.1, 144.9, 135.8, 135.5, 134.8, 131.0, 130.0, 127.1, 125.2, 124.6, 123.2, 122.5, 121.4, 121.2, 115.9, 115.7, 113.5, 109.3, 59.8, 34.2, 29.9, 21.6, 14.3, 13.4 ppm. HRMS (ESI)  $m/z$  Calcd for  $[C_{37}H_{41}NO_6S + H]^+$  628.2727, found 628.2732.

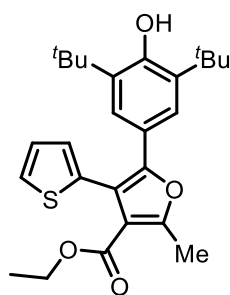

**ethyl 5-(3,5-di-tert-butyl-4-hydroxyphenyl)-2-methyl-4-(thiophen-2-yl)furan-3-carboxylate (5l)** Prepared through general procedure to give **5l** in 75.7 mg, 86% yield. White solid, m.p. 94 – 96 °C,  $R_f$  = 0.4 (PE/EA = 50/1).  $^1\text{H}$  NMR (300 Hz,  $\text{CDCl}_3$ )  $\delta$  7.37 – 7.35 (m, 1H), 7.32 (s, 2H), 7.07 – 7.04 (m, 1H), 6.98 – 6.96 (m, 1H), 5.26 (s, 1H), 4.12 (q,  $J$  = 7.1 Hz, 2H), 2.67 (s, 3H), 1.32 (s, 18H), 1.10 (t,  $J$  = 7.1 Hz, 3H) ppm.  $^{13}\text{C}$  NMR (75 MHz,  $\text{CDCl}_3$ )  $\delta$  164.1, 157.6, 153.8, 150.3, 135.8, 135.0, 128.1, 127.0, 126.2, 122.9, 121.4, 116.1, 112.2, 59.9, 34.4, 30.2, 14.3, 14.0 ppm. HRMS (ESI)  $m/z$  Calcd for  $[\text{C}_{26}\text{H}_{32}\text{O}_4\text{S} + \text{H}]^+$  440.2021, found 440.2005.

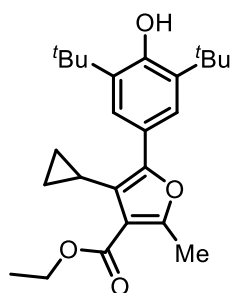

**ethyl 4-cyclopropyl-5-(3,5-di-tert-butyl-4-hydroxyphenyl)-2-methylfuran-3-carboxylate (5m)** Prepared through general procedure to give **5m** in 47.8 mg, 60% yield. White solid, m.p. 78 – 80 °C,  $R_f$  = 0.4 (PE/EA = 50/1).  $^1\text{H}$  NMR (300 Hz,  $\text{CDCl}_3$ )  $\delta$  7.51 (s, 2H), 5.29 (s, 1H), 4.33 (q,  $J$  = 7.1 Hz, 2H), 2.57 (s, 3H), 1.93 – 1.84 (m, 1H), 1.48 (s, 18H), 1.38 (t,  $J$  = 7.1 Hz, 3H), 0.91 – 0.85 (m, 1H), 0.34 – 0.29 (m, 1H) ppm.  $^{13}\text{C}$  NMR (75 MHz,  $\text{CDCl}_3$ )  $\delta$  165.0, 157.3, 153.5, 150.6, 135.5, 124.2, 122.1, 120.1, 116.3, 60.0, 34.6, 30.5, 14.5, 14.3, 8.9, 6.9, 1.2 ppm. HRMS (ESI)  $m/z$  Calcd for  $[\text{C}_{25}\text{H}_{34}\text{O}_4 + \text{H}]^+$  399.2530, found 399.2520.

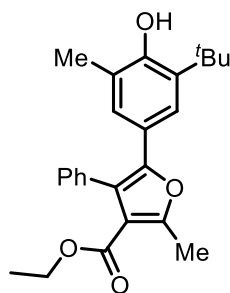

**ethyl 5-(3-(tert-butyl)-4-hydroxy-5-methylphenyl)-2-methyl-4-phenylfuran-3-carboxylate (5n)** Prepared through general procedure to give **5n** in 66.7 mg, 85% yield. White solid, m.p. 122 – 124 °C,  $R_f$  = 0.4 (PE/EA = 50/1).  $^1\text{H}$  NMR (300 Hz,  $\text{CDCl}_3$ )  $\delta$  7.39 – 7.27 (m, 5H), 7.15 (d,  $J$  = 1.9 Hz, 1H), 6.98 (d,  $J$  = 1.8 Hz, 1H), 4.85 (s, 1H), 4.08 (q,  $J$  = 7.1 Hz, 2H), 2.67 (s, 3H), 2.16 (s, 3H), 1.16 (s, 9H), 1.03 (t,  $J$  = 7.1 Hz, 3H) ppm.  $^{13}\text{C}$  NMR (75 MHz,  $\text{CDCl}_3$ )  $\delta$  164.4, 157.6, 152.3, 148.2, 135.4, 134.4, 130.4, 128.2, 127.2, 125.8, 123.3, 123.1, 122.3, 120.4, 115.5, 59.9, 34.5, 29.5, 16.2, 14.4, 13.9 ppm. HRMS (ESI)  $m/z$  Calcd for  $[\text{C}_{25}\text{H}_{28}\text{O}_4 + \text{H}]^+$  393.2060, found 393.2068.

## 7. Gram-scale Reactions

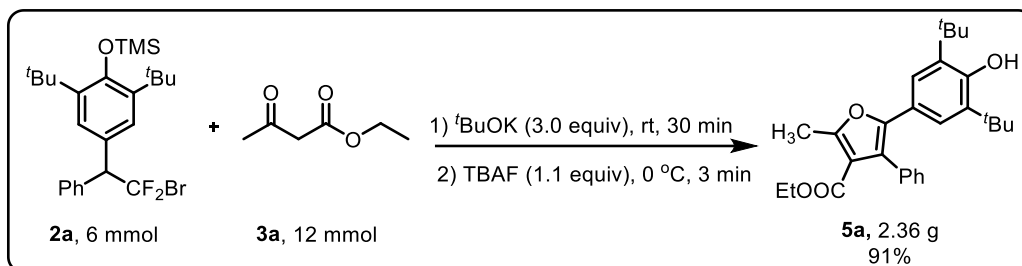

To an oven-dried 250 mL round-bottomed flask equipped with a Teflon coated magnetic stir bar was added <sup>t</sup>BuOK (2.0 g, 18 mmol, 3.0 equiv in 15 mL DCM) and **3a** (1.56 g, 12 mmol, 2.0 equiv in 15 mL DCM) under air. The reaction mixture was stirred for 30 min at ambient temperature, at which time TBAF (1.42 g, 6.6 mmol, 1.1 equiv in 15 mL DCM) was added, and then **2a** (2.98g, 6 mmol in 15 mL DCM) was added dropwise to the reaction mixture at 0 °C. Then the reaction mixture was stirred at this temperature for 3 min. After the material was completely consumed (monitored by TLC), saturated solution of NH<sub>4</sub>Cl (5 mL) was slowly added to quench the reaction. The reaction mixture was extracted with DCM (3 × 30 mL). The combined organic layers were dried over anhydrous MgSO<sub>4</sub>, filtered, and concentrated in vacuo. The residue was purified by flash chromatography on silica gel (PE/EA) to afford product **5a** as a white solid (2.36 g, 91% yield).

## 8. Mechanism Studies

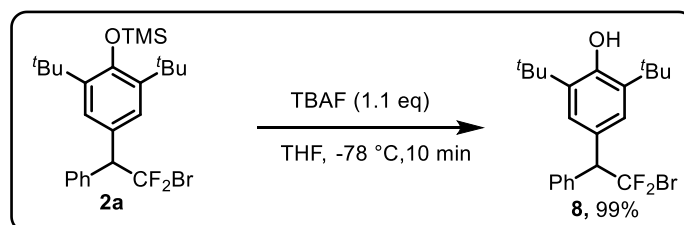

**4-(2-bromo-2,2-difluoro-1-phenylethyl)-2,6-di-tert-butylphenol (8)** To an oven-dried 8 mL disposable culture tube equipped with a Teflon coated magnetic stir bar was added **2a** (99.2 mg, 0.2 mmol in 0.5 mL THF). After the reaction mixture was cooled to -78 °C, TBAF (47.6 mg, 0.22 mmol, 1.1 equiv in 0.5 mL THF) was added. Then the reaction mixture was stirred for about 10 min at this temperature. After the starting material was consumed completely (monitored by TLC), saturated solution of NH<sub>4</sub>Cl (5 mL) was slowly added to quench the reaction at -78 °C, and then the reaction mixture was extracted with EA (3 × 10 mL). The organic layers were combined and dried over anhydrous MgSO<sub>4</sub>. After removal of the solvent in vacuo, the crude material was purified by flash chromatography on silica gel (PE/EA) to afford product as white solid (83.9 mg, 99% yield). M.p. 76 – 78 °C, R<sub>f</sub> = 0.4 (PE/EA = 50/1). <sup>1</sup>H NMR (300 MHz, CDCl<sub>3</sub>) δ 7.17 – 7.12 (m, 5H), 6.82 (s, 2H), 5.26 (s, 1H), 5.04 (dd, *J* = 17.4, 6.0 Hz, 1H), 1.22 (s, 18H). <sup>13</sup>C NMR (75 MHz, CDCl<sub>3</sub>), δ 155.3, 135.4, 135.3 (*app. d*, <sup>3</sup>*J* = 4.0 Hz), 129.9, 129.0, 128.2, 123.9 (dd, <sup>3</sup>*J* = 25.7, 25.7 Hz), 123.4 (dd, <sup>4</sup>*J* = 5.4, 5.6 Hz), 120.0 (dd, <sup>1</sup>*J* =

248.6, 248.6 Hz), 55.9 (dd,  $^2J = 33.4, 31.0$  Hz), 34.4, 30.1 ppm.  $^{19}\text{F}$  NMR (282 MHz,  $\text{CDCl}_3$ )  $\delta$  -93.4 (d,  $J = 235.4$  Hz), -101.8 (d,  $J = 235.4$  Hz) ppm. HRMS (ESI)  $m/z$  Calcd for  $[\text{C}_{22}\text{H}_{27}\text{BrF}_2\text{O} + \text{K}]^+$  463.0845, found 463.0844.

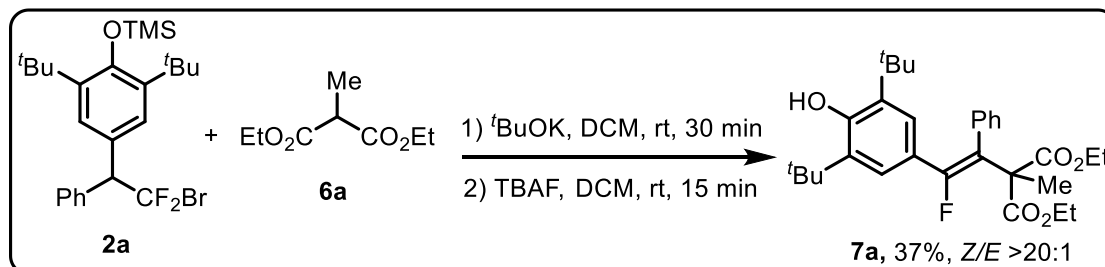

**Diethyl (Z)-2-(2-(3,5-di-tert-butyl-4-hydroxyphenyl)-2-fluoro-1-phenylvinyl)-2-methylmalonate (7a)** Prepared through general procedure to give **7a** in 36.9 mg, 37% yield,  $Z/E > 20:1$ . The configuration of the olefin motif was confirmed by X-ray analysis. White solid, m. p. 120 – 122 °C,  $R_f = 0.45$  (PE/EA = 10/1).  $^1\text{H}$  NMR (300 MHz,  $\text{CDCl}_3$ )  $\delta$  7.32 – 7.19 (m, 5H), 6.94 (s, 2H), 5.27 (s, 1H), 4.12 (q,  $J = 7.2$  Hz, 4H), 1.65 (s, 3H), 1.22 – 1.17 (m, 24H) ppm.  $^{13}\text{C}$  NMR (75 MHz,  $\text{CDCl}_3$ )  $\delta$  171.2, 156.4 (d,  $^1J = 252.4$  Hz), 154.2, 136.6 (d,  $^3J = 8.4$  Hz), 135.0, 130.8 (d,  $^4J = 3.1$  Hz), 128.6, 127.6, 125.3 (d,  $^3J = 7.6$  Hz), 123.0 (d,  $^2J = 28.2$  Hz), 117.8 (d,  $^2J = 19.5$  Hz), 61.6, 58.8, 34.3, 30.1, 22.0 (d,  $^4J = 3.1$  Hz), 14.0 ppm.  $^{19}\text{F}$  NMR (282 MHz,  $\text{CDCl}_3$ )  $\delta$  -96.2 ppm. HRMS (ESI)  $m/z$  Calcd for  $[\text{C}_{30}\text{H}_{39}\text{FO}_5 + \text{H}]^+$  497.2709, found 497.2704.

## 9. Derivatization of Products

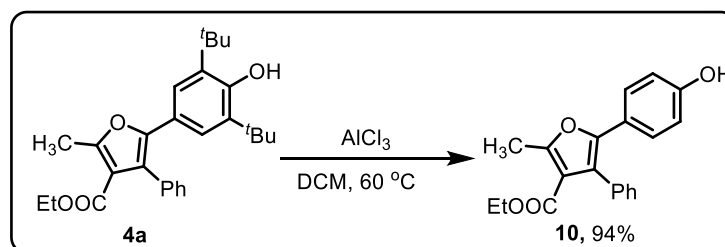

**ethyl 5-(4-hydroxyphenyl)-2-methyl-4-phenylfuran-3-carboxylate (10)** <sup>[2]</sup> To an oven-dried 25-mL two-necked flask equipped with a Teflon coated magnetic stir bar was added  $\text{AlCl}_3$  (26.7 mg, 0.12 mmol, 6.0 eq.). Then the Schlenk tube was evacuated and filled with argon for three times. After that, **4a** (92.0 mg, 0.2 mmol) dissolved in DCM (4.0 mL) was added. The reaction was stirred for 15 min under at 60 °C. After complete consumption of **4a**, 1 M HCl was added to quench the reaction. The reaction mixture was extracted with DCM ( $3 \times 10$  mL). The organic layers were combined and dried over anhydrous  $\text{MgSO}_4$ , filtered, and concentrated in vacuo. The residue was purified by flash chromatography on silica gel (PE/EA) to afford product **10** as a white solid (60.5 mg, 94% yield). M.p. 96 – 98 °C,  $R_f = 0.3$  (PE/EA = 5/1).  $^1\text{H}$  NMR (300 Hz,  $\text{DMSO}-d_6$ )  $\delta$  9.65 (s, 1H), 7.41 – 7.34 (m, 3H), 7.25 – 7.22 (m, 2H), 7.07 (d,  $J = 8.7$  Hz, 2H), 6.64 (d,  $J = 8.4$  Hz, 2H), 3.99 (q,  $J = 7.1$  Hz, 2H), 2.61 (s, 3H), 0.96 (t,  $J = 7.1$  Hz, 3H) ppm.  $^{13}\text{C}$

NMR (75 MHz, DMSO-*d*<sub>6</sub>)  $\delta$  163.0, 157.2, 156.9, 147.4, 133.3, 130.1, 128.0, 127.2, 126.9, 120.7, 119.6, 115.3, 115.0, 59.4, 13.8, 13.6 ppm. HRMS (ESI) *m/z* Calcd for [C<sub>20</sub>H<sub>19</sub>O<sub>4</sub> + H]<sup>+</sup> 323.1278, found 323.1283.

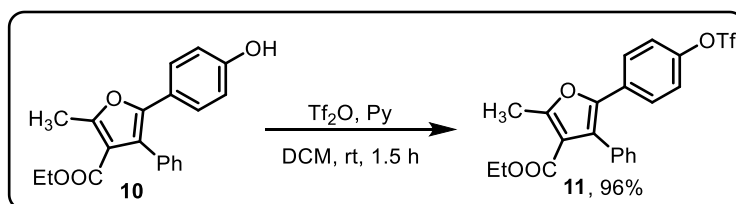

**Ethyl 2-methyl-4-phenyl-5-(4-(((trifluoromethyl)sulfonyl)oxy)phenyl)furan-3-carboxylate (11)** [4] To a solution of **10** (0.2 g, 0.56 mmol, 1.0 equiv) and pyridine (88.0 mg, 1.12 mmol, 2.0 equiv) in DCM (1 mL) was slowly added trifluoromethanesulfonic anhydride in DCM (0.19 g, 0.67 mmol, 1.2 equiv, 0.5M) at 0 °C. Then the reaction mixture was warmed to room temperature and stirred about 1.5 h at this temperature. After **10** was completely consumed, the mixture was poured into 10% aqueous hydrochloric acid solution and extracted with DCM (3 × 5 mL). The combined organic layers were washed with brined and dried over Na<sub>2</sub>SO<sub>4</sub>. After filtration, the organic phase was concentrated under reduced pressure and the residues were purified by flash column chromatography on silica gel (PE/EA) to give the product (0.24 g, 96% yield) as white solid. M.p. 98 – 100 °C, *R*<sub>f</sub> = 0.4 (PE/EA = 50/1). <sup>1</sup>H NMR (300 Hz, DMSO-*d*<sub>6</sub>)  $\delta$  7.44 – 7.36 (m, 7H), 7.30 – 7.26 (m, 2H), 4.00 (q, *J* = 7.1 Hz, 2H), 2.64 (s, 3H), 0.95 (t, *J* = 7.1 Hz, 3H) ppm. <sup>13</sup>C NMR (75 MHz, DMSO-*d*<sub>6</sub>)  $\delta$  162.6, 158.7, 148.0, 145.0, 132.6, 130.2, 129.7, 128.3, 127.8, 126.8, 123.5, 121.8, 118.2 (q, *J* = 319.0 Hz), 115.5, 59.6, 13.8, 13.5 ppm. <sup>19</sup>F NMR (282 MHz, DMSO-*d*<sub>6</sub>)  $\delta$  -73.0 ppm. HRMS (ESI) *m/z* Calcd for [C<sub>21</sub>H<sub>17</sub>F<sub>3</sub>O<sub>6</sub>S + H]<sup>+</sup> 455.0771, found 455.0775.

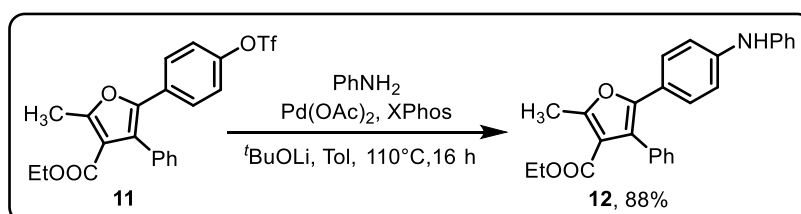

**ethyl 2-methyl-4-phenyl-5-(4-(phenylamino)phenyl)furan-3-carboxylate(12)**[7] To an oven-dried 10-mL Schlenk tube equipped with a Teflon coated magnetic stir bar was added **11** (90.8 mg, 0.2 mmol, 1.0 eq.), Pd(OAc)<sub>2</sub> (4.5 mg, 10 mol%), Xphos (19 mg, 20 mol%) and <sup>t</sup>BuOLi (35.2 mg, 0.44 mmol, 2.2 eq.). Then the schlenk tube was evacuated and filled with argon for three times. After that, benzenamine (20.5 mg, 0.22 mmol, 1.1 eq.) in toluene (1 mL) was added under argon atmosphere via a syringe. After stirred at 110 °C of 16 h, the reaction mixture was filtered through a pad of celite, and concentrated under reduced pressure. Purification by flash chromatography on silica gel (PE/EA) to afford the desired product as a white solid (69.9 mg, 88% yield). M.p. 178 – 180 °C, *R*<sub>f</sub> = 0.4 (PE/EA = 50/1). <sup>1</sup>H NMR (300 Hz, CDCl<sub>3</sub>)  $\delta$  7.33 – 7.31 (m, 5H), 7.24 – 7.18 (m, 4H), 7.02 – 6.99 (m, 2H), 6.93 – 6.83 (m, 3H) 5.71 (s, 1H), 4.07 (q, *J* = 7.1 Hz, 2H), 2.66 (s, 3H), 1.02 (t, *J* = 7.1 Hz, 3H) ppm. <sup>13</sup>C NMR (75 MHz, CDCl<sub>3</sub>)  $\delta$  159.5, 152.9,

143.0, 137.9, 137.6, 129.3, 125.6, 124.6, 123.4, 122.5, 122.0, 118.1, 116.8, 115.7, 113.8, 111.9, 110.8, 55.1, 9.5, 9.1 ppm. HRMS (ESI)  $m/z$  Calcd for  $[C_{26}H_{23}NO_3 + H]^+$  for 398.1751, found 398.1741.

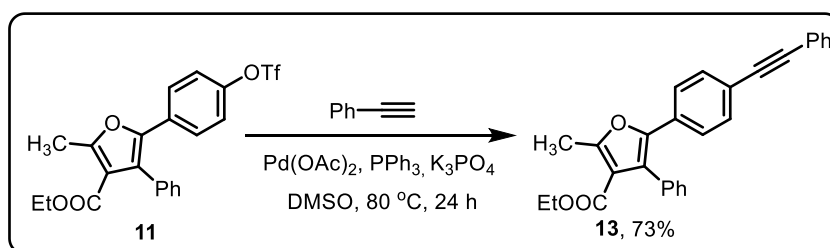

**ethyl 2-methyl-4-phenyl-5-(4-(phenylethynyl)phenyl)furan-3-carboxylate (13)** To an oven-dried 10-mL Schlenk tube equipped with a Teflon coated magnetic stir bar was added **11** (90.8 mg, 0.2 mmol, 1.0 eq.), Pd(OAc)<sub>2</sub> (1.4 mg, 3 mol%), PPh<sub>3</sub> (6.3 mg, 4.0 eq. to Pd), and K<sub>3</sub>PO<sub>4</sub> (51.7 mg, 0.24 mmol, 1.2 eq.). Then the Schlenk tube was evacuated and filled with argon for three times. After that, phenylacetylene (30.6 mg, 0.3 mmol, 1.5 eq.) in DMSO (2 mL) was added via a syringe<sup>[6]</sup>. After stirring at 80 °C of 24 h, the reaction mixture was filtered through a pad of celite and concentrated under reduced pressure. Purification by flash chromatography on silica gel (PE/EA) to afford the desired product as a white solid (59.3 mg, 73% yield). M.p. 106 – 108 °C,  $R_f$  = 0.4 (PE/EA = 50/1). <sup>1</sup>H NMR (300 Hz, CDCl<sub>3</sub>) δ 7.52 – 7.49 (m, 2H), 7.41 – 7.29 (m, 12H), 4.10 (q,  $J$  = 7.1 Hz, 2H), 2.71 (s, 3H), 1.05 (t,  $J$  = 7.1 Hz, 3H) ppm. <sup>13</sup>C NMR (75 MHz, CDCl<sub>3</sub>) δ 164.0, 158.7, 146.9, 133.6, 131.7, 131.6, 130.2, 130.1, 128.4, 128.4, 127.7, 125.2, 123.4, 123.3, 122.0, 116.0, 90.4, 89.4, 60.0, 14.4, 13.9 ppm. HRMS (ESI)  $m/z$  Calcd for  $[C_{28}H_{22}O_3 + H]^+$  407.1642, found 407.1629.

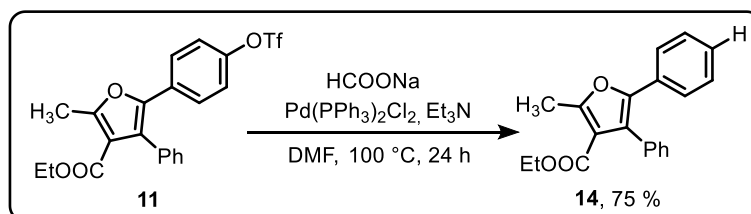

**ethyl 2-methyl-4,5-diphenylfuran-3-carboxylate (14)**<sup>[5]</sup> To an oven-dried 10-mL Schlenk tube equipped with a Teflon coated magnetic stir bar was added **11** (90.8 mg, 0.2 mmol, 1.0 eq.), PdCl<sub>2</sub>(PPh<sub>3</sub>)<sub>2</sub> (14 mg, 0.02 mmol, 10 mol %), and HCO<sub>2</sub>Na (27.6 mg, 0.4 mmol, 2.0 eq.). Then the Schlenk tube was evacuated and filled with argon for three times. After that, Et<sub>3</sub>N (60.7 mg, 0.6 mmol, 3.0 eq.) and anhydrous DMF (2.0 mL) were added under argon atmosphere via a syringe. The reaction mixture was stirred at 100 °C (oil bath) for 24 h. After complete consumption of **11**, the reaction mixture was filtered through a pad of celite and concentrated under reduced pressure. The residue was purified by flash chromatography on silica gel (PE/EA) to afford the desired product **14** as a white solid (45.9 mg, 75% yield). M.p. 68 – 70 °C,  $R_f$  = 0.4 (PE/EA = 50/1). <sup>1</sup>H NMR (300 Hz, DMSO-*d*<sub>6</sub>) δ 7.38 – 7.36 (m, 3H), 7.26 – 7.21 (m, 7H), 3.98 (q,  $J$  = 7.1 Hz, 2H), 2.62 (s, 3H), 0.94 (t,  $J$  = 7.1 Hz, 3H) ppm. <sup>13</sup>C NMR (75 MHz, DMSO-*d*<sub>6</sub>) δ 168.1, 163.1, 151.9, 138.3, 135.1, 134.8, 133.7, 133.4, 132.9, 132.7, 130.3, 127.2, 120.5,

64.7, 19.0, 18.8 ppm. HRMS (ESI)  $m/z$  Calcd for  $[C_{20}H_{18}O_3 + H]^+$  307.1329, found 307.1325.

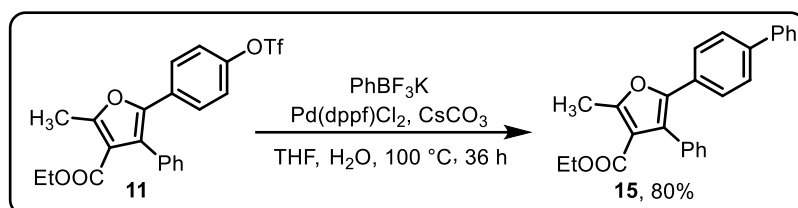

**ethyl 5-([1,1'-biphenyl]-4-yl)-2-methyl-4-phenylfuran-3-carboxylate (15)**<sup>[8]</sup> To an oven-dried 10-mL Schlenk tube equipped with a Teflon coated magnetic stir bar was added **11** (90.8 mg, 0.2 mmol, 1.0 equiv),  $Cs_2CO_3$  (195.5 mg, 0.6 mmol, 3.0 equiv),  $PhBF_3K$  (38.6 mg, 0.21 mmol, 1.0 equiv),  $Pd(dppf)Cl_2$  (14.6 mg, 0.02 mmol, 10 mol %). Then the Schlenk tube was evacuated and filled with argon for three times. After that, THF (2.0 mL) and  $H_2O$  (0.6 mL) were added under argon atmosphere via a syringe. After stirred at 100 °C for 36 h, the reaction was quenched with brine and extracted with EA ( $3 \times 4$  mL). The combined organic phase was washed with brine, dried over  $Mg_2SO_4$ , evaporated to give the crude products. The residue was purified by flash chromatography (PE/EA) to give the desired product as a white solid (61.1 mg, 80% yield). M.p. 88 – 90 °C,  $R_f = 0.4$  (PE/EA = 50/1).  $^1H$  NMR (300 Hz,  $CDCl_3$ )  $\delta$  7.53 – 7.51 (m, 2H), 7.45 – 7.29 (m, 12H), 4.08 (q,  $J = 7.1$  Hz, 2H), 2.70 (s, 3H), 1.03 (t,  $J = 7.1$  Hz, 3H) ppm.  $^{13}C$  NMR (75 MHz,  $CDCl_3$ ) 164.8, 159.1, 147.9, 141.2, 140.6, 134.5, 130.9, 130.0, 129.5, 129.0, 128.2, 128.1, 127.7, 127.6, 126.5, 123.3, 116.5, 60.6, 15.0, 14.5 ppm. HRMS (ESI)  $m/z$  Calcd for  $[C_{26}H_{22}O_3 + H]^+$  for 383.1642, found 383.1634.

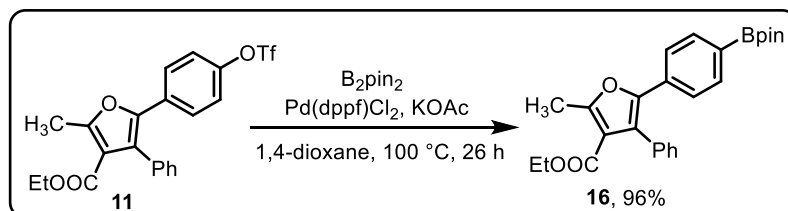

**ethyl 5-((4-(4,4,5,5-tetramethyl-1,3,2-dioxaborolan-2-yl)phenyl)-2-methyl-4-phenylfuran-3-carboxylate (16)**<sup>[8]</sup> To an oven-dried 10-mL Schlenk tube equipped with a Teflon coated magnetic stir bar was added **11** (90.8 mg, 0.2 mmol, 1.0 eq.), bis(pinacolato)diboron (76.2 mg, 0.3 mmol, 1.5 eq.), potassium acetate (58.8 mg, 0.6 mmol, 3.0 eq.) and  $Pd(dppf)Cl_2$  (14.6 mg, 10 mol%) sequentially. Then the Schlenk tube was evacuated and filled with argon for three times. After that, anhydrous 1,4-dioxane (1.0 mL) was added under argon atmosphere via a syringe. After stirred at 100 °C of 26 h, the reaction mixture was filtered through a pad of celite, and concentrated under reduced pressure. The residue was purified by flash chromatography on silica gel (PE/EA) to afford the desired product as a white solid (58.8 mg, 96% yield). M.p. 93 – 95 °C,  $R_f = 0.4$  (PE/EA = 50/1).  $^1H$  NMR (300 Hz,  $CDCl_3$ )  $\delta$  7.64 – 7.62 (m, 2H), 7.33 – 7.28 (m, 7H), 4.08 (q,  $J = 7.1$  Hz, 2H), 2.68 (s, 3H), 1.30 (s, 12H), 1.03 (t,  $J = 7.1$  Hz, 3H) ppm.  $^{13}C$  NMR (75 MHz,  $CDCl_3$ )  $\delta$  164.0, 158.7, 147.4, 134.8, 133.7, 132.8, 130.2,



128.2, 127.5 (two carbon signals overlapped), 124.6, 123.4, 115.9, 83.8, 59.9, 24.9, 14.4, 13.9 ppm. HRMS (ESI)  $m/z$  Calcd for  $[C_{20}H_{18}O_3 + H]^+$  306.1250, found 306.1262.

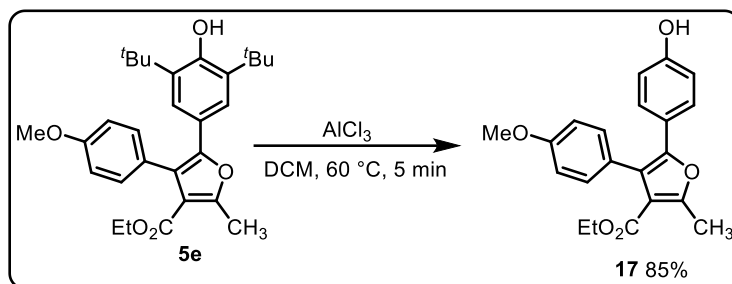

**ethyl 5-((1,1'-biphenyl)-4-yl)-2-methyl-4-phenylfuran-3-carboxylate (17)**<sup>[2]</sup> To an oven-dried 25-mL two-necked flask equipped with a Teflon coated magnetic stir bar was added  $AlCl_3$  (26.7 mg, 0.12 mmol, 6.0 eq.). Then the Schlenk tube was evacuated and filled with argon for three times. After that, **5e** (92.8 mg, 0.2 mmol) dissolved in DCM (4.0 mL) was added. The reaction was stirred for 15 min under at 60 °C. After complete conversion of **5e**, 1 M HCl was added to quench the reaction. The reaction mixture was extracted with DCM ( $3 \times 10$  mL). The organic layers were combined and dried over anhydrous  $MgSO_4$ . After removal of the solvent in vacuo, the crude material was purified by flash chromatography on silica gel (PE/EA) to afford product **17** as a white solid (59.8 mg, 85% yield). M.p. 108 – 110 °C,  $R_f = 0.4$  (PE/EA = 50/1).  $^1H$  NMR (300 MHz,  $DMSO-d_6$ )  $\delta$  9.63 (s, 1H), 7.15 – 7.08 (m, 4H), 6.92 (d,  $J = 8.6$  Hz, 2H), 6.66 (d,  $J = 8.7$  Hz, 2H), 4.01 (q,  $J = 7.1$  Hz, 2H), 3.78 (s, 3H), 2.58 (s, 3H), 1.01 (t,  $J = 7.1$  Hz, 3H) ppm.  $^{13}C$  NMR (75 MHz,  $DMSO-d_6$ )  $\delta$  163.6, 159.0, 157.6, 157.2, 147.9, 131.7, 127.3, 125.7, 121.4, 119.8, 115.8, 115.6, 114.0, 59.9, 55.5, 14.4, 14.2 ppm. HRMS (ESI)  $m/z$  Calcd for  $[C_{21}H_{20}O_5 + H]^+$  for 353.1384, found 353.1380.

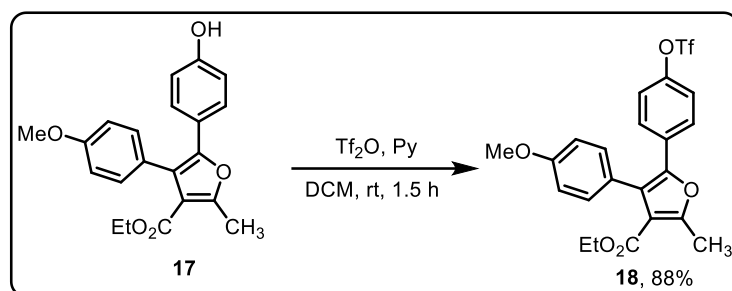

**ethyl 5-((1,1'-biphenyl)-4-yl)-2-methyl-4-phenylfuran-3-carboxylate (18)** To a solution of **17** (70.4 mg, 0.2 mmol, 1.0 equiv) and pyridine (31.6 mg, 0.4 mmol, 2.0 equiv) in DCM (1 mL) was slowly added trifluoromethanesulfonic anhydride in DCM (67.7 mg, 0.24 mmol, 1.2 equiv, 0.5M) at 0 °C. Then the reaction mixture was warmed to room temperature and stirred for 1.5 h at this temperature. After **17** was completely consumed, the mixture was poured into 10% HCl (aq.) and extracted with DCM. The organic layers were washed with brined and dried over  $Na_2SO_4$ , filtered, and concentrated under reduced pressure. The residue was purified by flash column chromatography on silica gel (PE/EA) to give the product as white solid (85.1 mg, 88% yield). M.p. 120 – 122 °C,  $R_f = 0.4$  (PE/EA = 50/1).  $^1H$  NMR (300 MHz,  $DMSO-d_6$ )  $\delta$  7.45 – 7.38 (m, 4H), 7.19 (d,

$J = 8.6$  Hz, 2H), 6.98 (d,  $J = 8.6$  Hz, 2H), 4.02 (q,  $J = 7.1$  Hz, 2H), 3.80 (s, 3H), 2.63 (s, 3H), 1.01 (t,  $J = 7.1$  Hz, 3H) ppm.  $^{13}\text{C}$  NMR (75 MHz,  $\text{DMSO-}d_6$ )  $\delta$  163.2, 159.4, 159.0, 148.5, 145.5, 131.5, 130.9, 127.3, 124.8, 123.8, 122.4, 118.7 (q,  $J = 320.8$  Hz), 116.2, 114.3, 60.1, 55.6, 14.4, 14.2 ppm.  $^{19}\text{F}$  NMR (282 MHz,  $\text{DMSO-}d_6$ )  $\delta$  -72.9 ppm. HRMS (ESI)  $m/z$  Calcd for  $[\text{C}_{22}\text{H}_{19}\text{F}_3\text{O}_7 \text{S} + \text{H}]^+$  for 485.0876, found 485.0862.

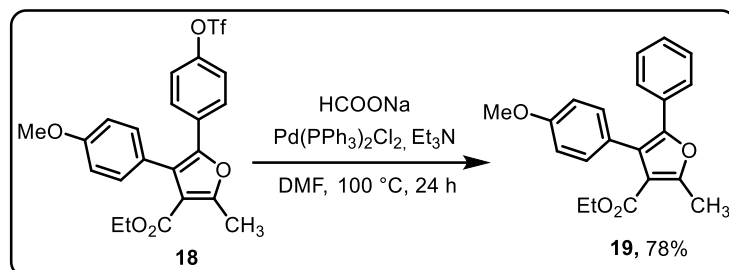

**ethyl 5-((1,1'-biphenyl)-4-yl)-2-methyl-4-phenylfuran-3-carboxylate (19)** To an oven-dried 10-mL Schlenk tube equipped with a Teflon coated magnetic stir bar was added **18** (96.8 mg, 0.2 mmol, 1.0 eq.),  $\text{PdCl}_2(\text{PPh}_3)_2$  (14 mg, 0.02 mmol, 10 mol %), and  $\text{HCO}_2\text{Na}$  (27.6 mg, 0.4 mmol, 2.0 eq.). The Schlenk tube was evacuated and filled with argon for three times. After that,  $\text{Et}_3\text{N}$  (60.7 mg, 0.6 mmol, 3.0 eq.) and anhydrous DMF (2.0 mL) were added under argon atmosphere via a syringe. The reaction mixture was stirred at 100 °C in oil bath for 24 h.<sup>[5]</sup> After **18** was completely consumed, the reaction mixture was filtered through a pad of celite and concentrated under reduced pressure. The residue was purified by flash chromatography on silica gel (PE/EA) to afford the desired product **19** as a white solid (52.4 mg, 78% yield). M.p. 108 – 110 °C,  $R_f = 0.4$  (PE/EA = 50/1).  $^1\text{H}$  NMR (300 MHz,  $\text{DMSO-}d_6$ )  $\delta$  7.27 – 7.15 (m, 7H), 6.95 (d,  $J = 8.5$  Hz, 2H), 4.02 (q,  $J = 7.0$  Hz, 2H), 3.79 (s, 3H), 2.62 (s, 3H), 1.01 (t,  $J = 7.1$  Hz, 3H) ppm.  $^{13}\text{C}$  NMR (75 MHz,  $\text{DMSO-}d_6$ )  $\delta$  163.4, 159.2, 158.2, 147.2, 131.6, 130.3, 129.0, 128.1, 125.5, 125.4, 122.2, 115.9, 114.1, 60.0, 55.5, 14.4, 14.2 ppm. HRMS (ESI)  $m/z$  Calcd for HRMS (ESI)  $m/z$  Calcd for  $[\text{C}_{21}\text{H}_{20}\text{O}_4 + \text{H}]^+$  for 337.1434, found 337.1434.

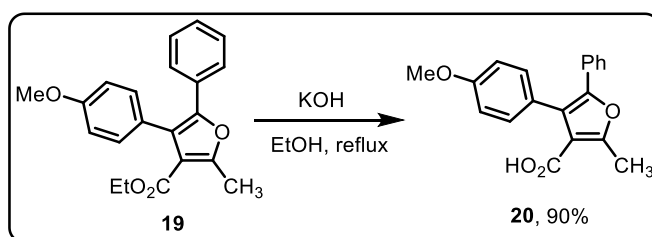

**ethyl 5-((1,1'-biphenyl)-4-yl)-2-methyl-4-phenylfuran-3-carboxylate (20)** To an oven-dried 10-mL Schlenk tube equipped with a Teflon coated magnetic stir bar was added **19** (67.2 mg, 0.2 mmol, 1.0 eq.), KOH (33.6 mg, 0.6 mmol, 3.0 eq) and EtOH (2 mL) were added sequentially. The resulting mixture was stirred at 80 °C for 12 h. After **19** was completely consumed, cooled to room temperature, the reaction was quenched by water. Then the mixture was extracted with EA (3 × 30 mL). The combined organic layers were dried over anhydrous  $\text{MgSO}_4$ , filtered, and concentrated in vacuo. The crude material was purified by flash chromatography on silica gel (PE/EA) to generate the title compound as white solid (55.5 mg, 90% yield). M.p. 128 – 130 °C,  $R_f = 0.4$  (PE/EA =

50/1).  $^1\text{H}$  NMR (300 MHz,  $\text{DMSO-}d_6$ )  $\delta$  12.33 (s, 1H), 7.24 – 7.15 (m, 7H), 6.94 (d,  $J$  = 8.5 Hz, 2H), 3.78 (s, 3H), 2.62 (s, 3H) ppm.  $^{13}\text{C}$  NMR (75 MHz,  $\text{DMSO-}d_6$ )  $\delta$  164.9, 158.9, 158.0, 147.0, 131.5, 130.3, 128.9, 127.9, 125.5 (two carbon signals overlapped), 122.4, 116.4, 114.0, 55.4, 14.4 ppm. HRMS (ESI)  $m/z$  Calcd  $[\text{C}_{19}\text{H}_{16}\text{O}_4 + \text{H}]^+$  for 309.1121, found 309.1124.

## 10. Crystal Structure of 4x and 7a

**Vapor diffusion crystallization method was used for crystal growth of 4x:** The compound 4x was dissolved in diethyl ether to make saturated solution in small vial and placed in closed bottle with another solvent as *n*-hexane.

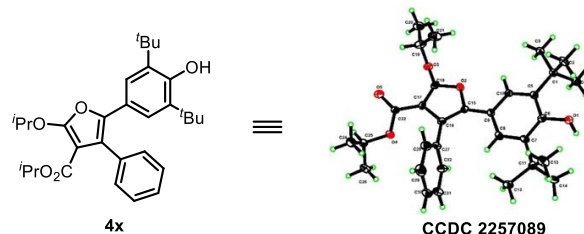

**Figure S1.** ORTEP plot of the crystal structure of compound 4x and thermal ellipsoid is set at 50% probability

**Table S1** X-ray Crystallographic Data of **4x**

|                                        |                                                                                                  |
|----------------------------------------|--------------------------------------------------------------------------------------------------|
| CCDC number                            | 2257089                                                                                          |
| Bond precision                         | C-C = 0.0078 Å Wavelength = 0.71073                                                              |
| Cell                                   | a=9.5453 (7) b=11.8954 (8) c=13.9574 (10)<br>alpha=109.552 (2) beta=107.835 (2) gamma=90.633 (2) |
| Temperature                            | 100 K                                                                                            |
| Volume                                 | 1410.21 (17)                                                                                     |
| Space group                            | P 1                                                                                              |
| Hall group                             | P 1                                                                                              |
| Sum formula                            | C <sub>31</sub> H <sub>40</sub> O <sub>5</sub>                                                   |
| Mr                                     | 492.63                                                                                           |
| Dx, g cm <sup>-3</sup>                 | 1.160                                                                                            |
| Z                                      | 2                                                                                                |
| Mu (mm <sup>-1</sup> )                 | 0.077                                                                                            |
| F000                                   | 532.0                                                                                            |
| F000'                                  | 532.25                                                                                           |
| h, k, lmax                             | 0, 0, 0                                                                                          |
| Nref                                   | 9940                                                                                             |
| Tmin, Tmax                             | 0.456, 0.586                                                                                     |
| Tmin'                                  | 0.993                                                                                            |
| Correction method                      | # Reported T Limits: Tmin=0.456 Tmax=0.586                                                       |
| AbsCorr                                | MULTI-SCAN                                                                                       |
| Data completeness                      | 1.73/0.87                                                                                        |
| Theta(max)                             | 26.379                                                                                           |
| R(reflections)                         | 0.0745( 5665)                                                                                    |
| wR2(reflections)                       | 0.2211( 9940)                                                                                    |
| S                                      | 1.043                                                                                            |
| Npar                                   | 671                                                                                              |
| Ellipsoid contour % probability levels | 50                                                                                               |

**Vapor diffusion crystallization method was used for crystal growth of 7a:** The compound **7a** was dissolved in dichloromethane to make saturated solution in small vial and placed in closed bottle with another solvent as *n*-hexane.

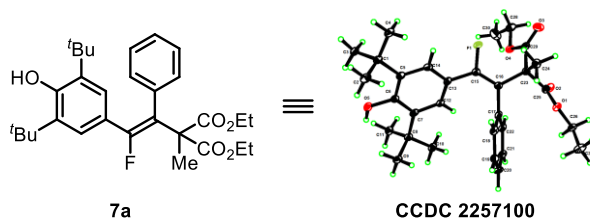

**Figure S2.** ORTEP plot of the crystal structure of compound **7a** and thermal ellipsoid is set at 50% probability

**Table S2.** X-ray Crystallographic Data of **7a**

|                                        |                                                                                    |
|----------------------------------------|------------------------------------------------------------------------------------|
| CCDC number                            | 2257100                                                                            |
| Bond precision                         | C-C = 0.0050 Å Wavelength=0.71073                                                  |
| Cell                                   | a=18.8386 (14) b=15.4558 (11) c=19.3981 (14)<br>alpha=90 beta=105.066 (2) gamma=90 |
| Temperature                            | 100 K                                                                              |
| Volume                                 | 5453.9(7)                                                                          |
| Space group                            | P 1 21/c 1                                                                         |
| Hall group                             | -p 2ybc                                                                            |
| Sum formula                            | C <sub>30</sub> H <sub>39</sub> FO <sub>5</sub>                                    |
| Mr                                     | 498.61                                                                             |
| Dx, g cm <sup>-3</sup>                 | 1.214                                                                              |
| Z                                      | 8                                                                                  |
| Mu (mm <sup>-1</sup> )                 | 0.086                                                                              |
| F000                                   | 2144.0                                                                             |
| F000'                                  | 2145.12                                                                            |
| h, k, lmax                             | 23, 19, 24                                                                         |
| Nref                                   | 10860                                                                              |
| Tmin, Tmax                             | 0.671,0.745                                                                        |
| Tmin'                                  | 0.990                                                                              |
| Correction method                      | # Reported T Limits: Tmin=0.671 Tmax=0.745                                         |
| AbsCorr                                | MULTI-SCAN                                                                         |
| Data completeness                      | 0.972                                                                              |
| Theta(max)                             | 26.384                                                                             |
| R(reflections)                         | 0.0768(6945)                                                                       |
| wR2(reflections)                       | 0.2538(10860)                                                                      |
| S                                      | 1.078                                                                              |
| Npar                                   | 688                                                                                |
| Ellipsoid contour % probability levels | 50                                                                                 |

## Reference

- [1] (a) Koutek, B.; Pavličková, L.; Souček, M. *Synth. Commun.* **1976**, *6*, 305. (b) Chu, W.; Zhang, L.; Bao, X.; Zhao, X.; Zeng, C.; Du, J.; Zhang, G.; Wang, F.; Ma, X.; Fan, C. *Angew. Chem., Int. Ed.* **2013**, *52*, 9229. (c) Caruana, L.; Kniep, F.; Johansen, T. K.; Poulsen, P. H.; Jørgensen, K. A. *J. Am. Chem. Soc.* **2014**, *136*, 15929. (d) Richter, D.; Hampel, N.; Singer, T.; Ofial, A. R.; Mayr, H. *Eur. J. Org. Chem.* **2009**, *19*, 3203. (e) López, A.; Parra, A.; Jarava-Barrera, C.; Tortosa, M. *Chem. Comm.* **2015**, *51*, 17684; (f) Gai, K.; Fang, X.; Li, X.; Xu, J.; Wu, X.; Lin, A.; Yao, H. *Chem. Commun.* **2015**, *51*, 15831.
- [2] Frost, J. R.; Cheong, C. B.; Donohoe, T. J. *Synthesis* **2017**, *49*, 910.
- [3] Lou, Y.; Cao, P.; Jia, T.; Zhang, Y.; Wang, M.; Liao, J. *Angew. Chem., Int. Ed.* **2015**, *54*, 12134.
- [4] (a) Zhu, J.; Xu, M.; Gong, B.; Lin, A.; Gao S. *Org. Lett.* **2023**, *25*, 3271. (b) Chen, Q.-Y.; He, Y.-B.; Yang, Z.-Y. *J. Chem. Soc., Chem. Commun.*, **1986**, 1452.
- [5] Shirakawa, E.; Kitabata, T.; Otsuka, H.; Tsuchimoto, T. *Tetrahedron* **2005**, *61*, 9878.
- [6] Taeufer, T.; Pospech, J. *J. Org. Chem.* **2020**, *85*, 7097.
- [7] Dai, Y.; Liang, S.; Zeng, G.; Huang, H.; Zhao, X.; Cao, S.; Jiang, Z. *Chem. Sci.* **2022**, *13*, 3787.
- [8] Liu, W.; Yang, X.; Gao, Y.; Li, C. *J. Am. Chem. Soc.* **2017**, *139*, 25, 8621.

# 11. $^1\text{H}$ , $^{13}\text{C}$ and $^{19}\text{F}$ NMR Spectra of Title Compounds

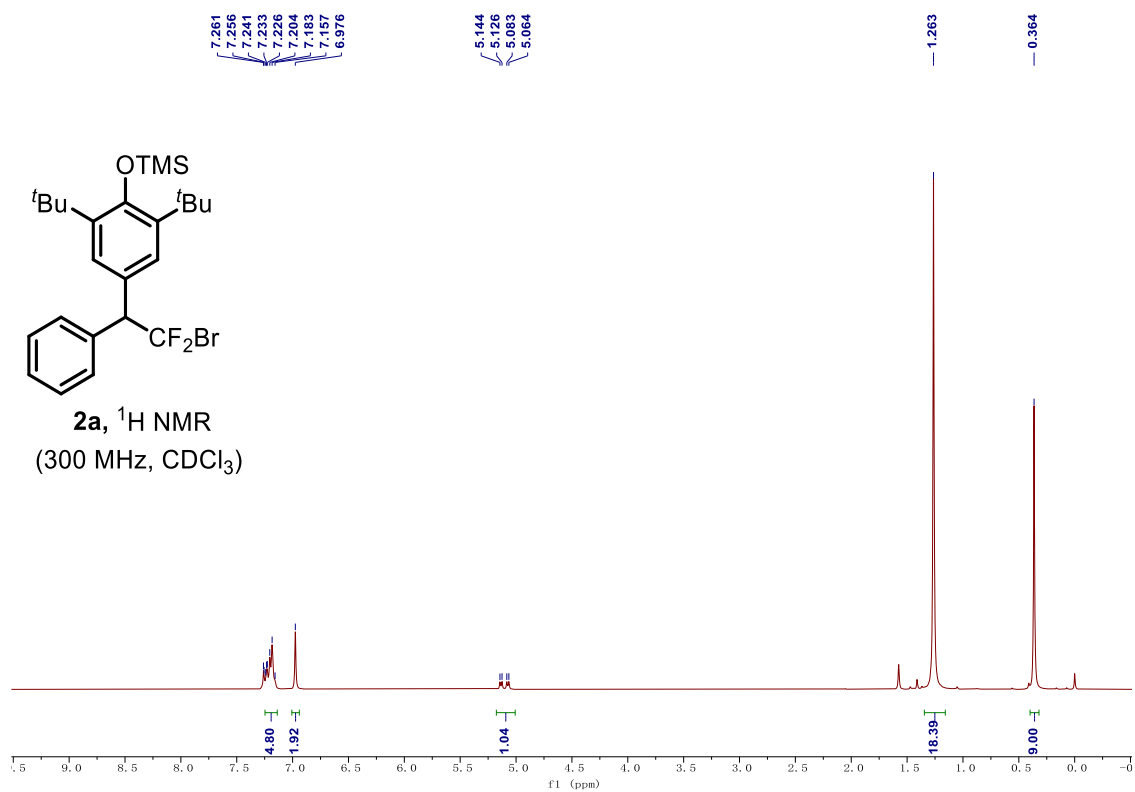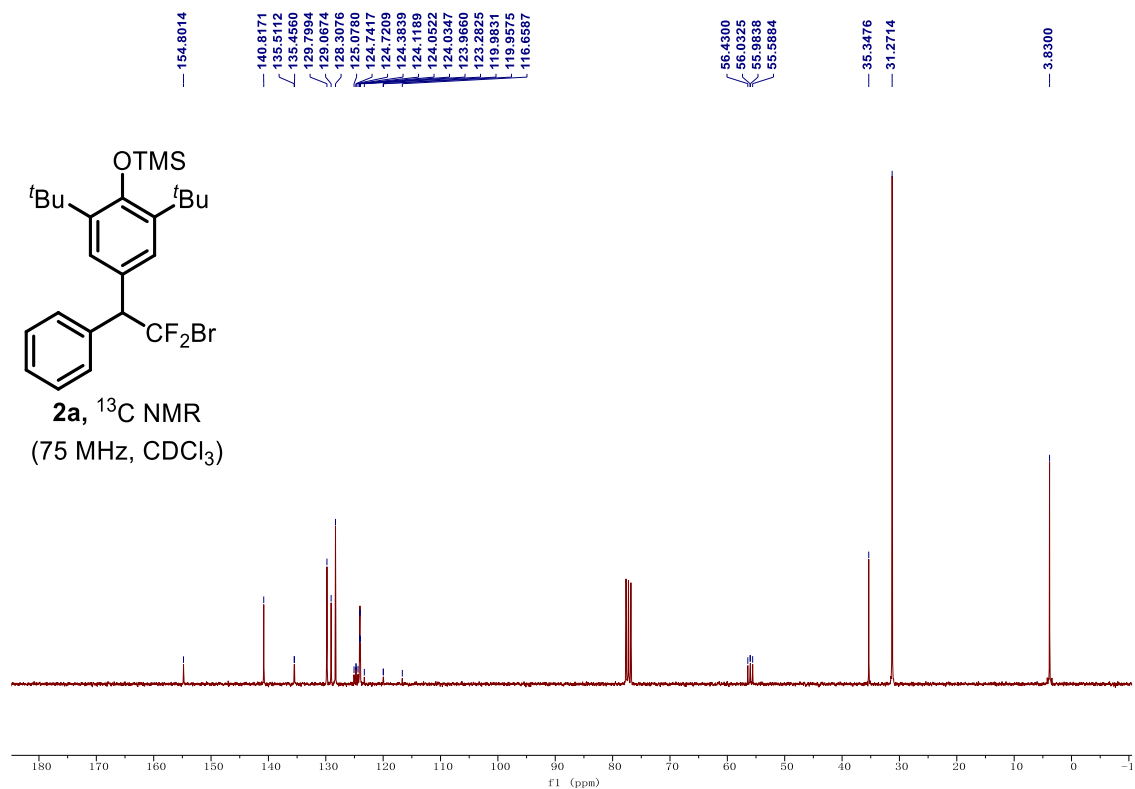

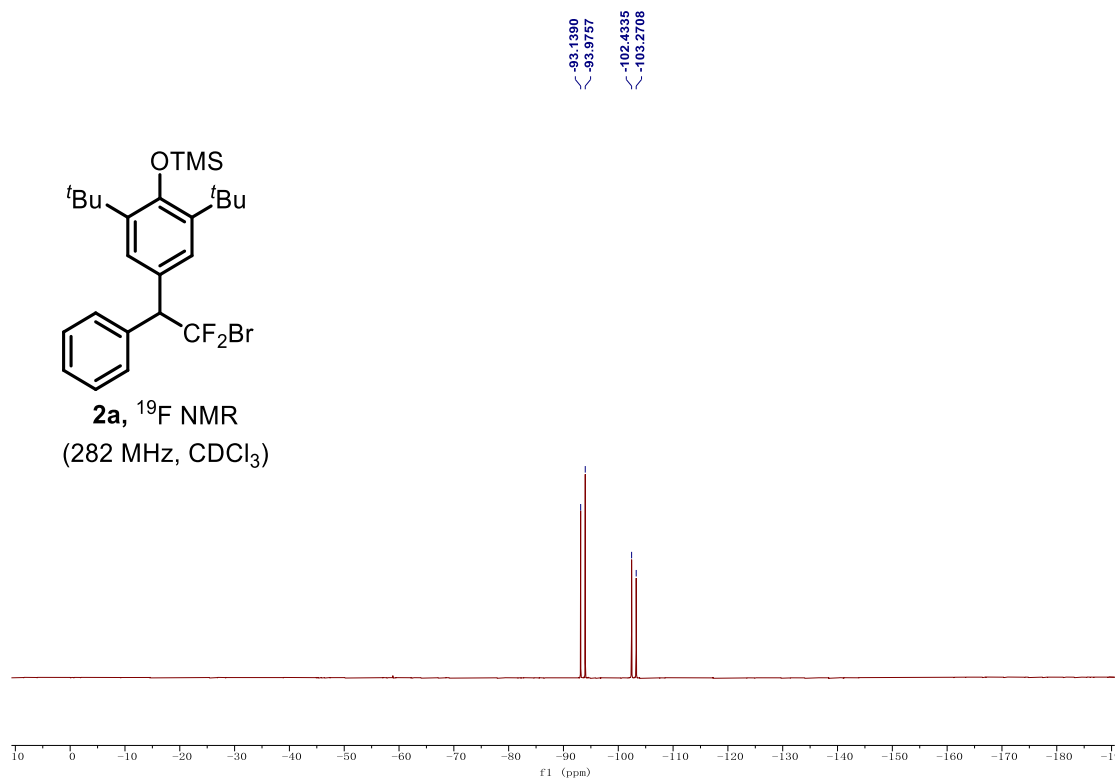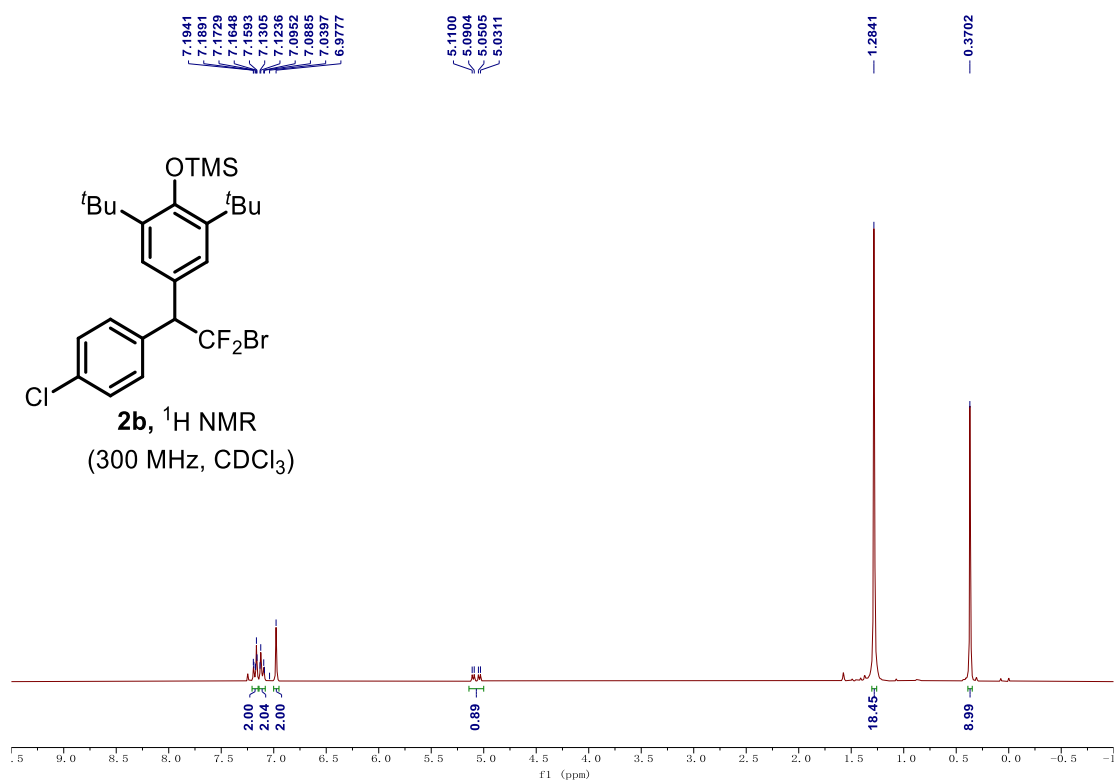



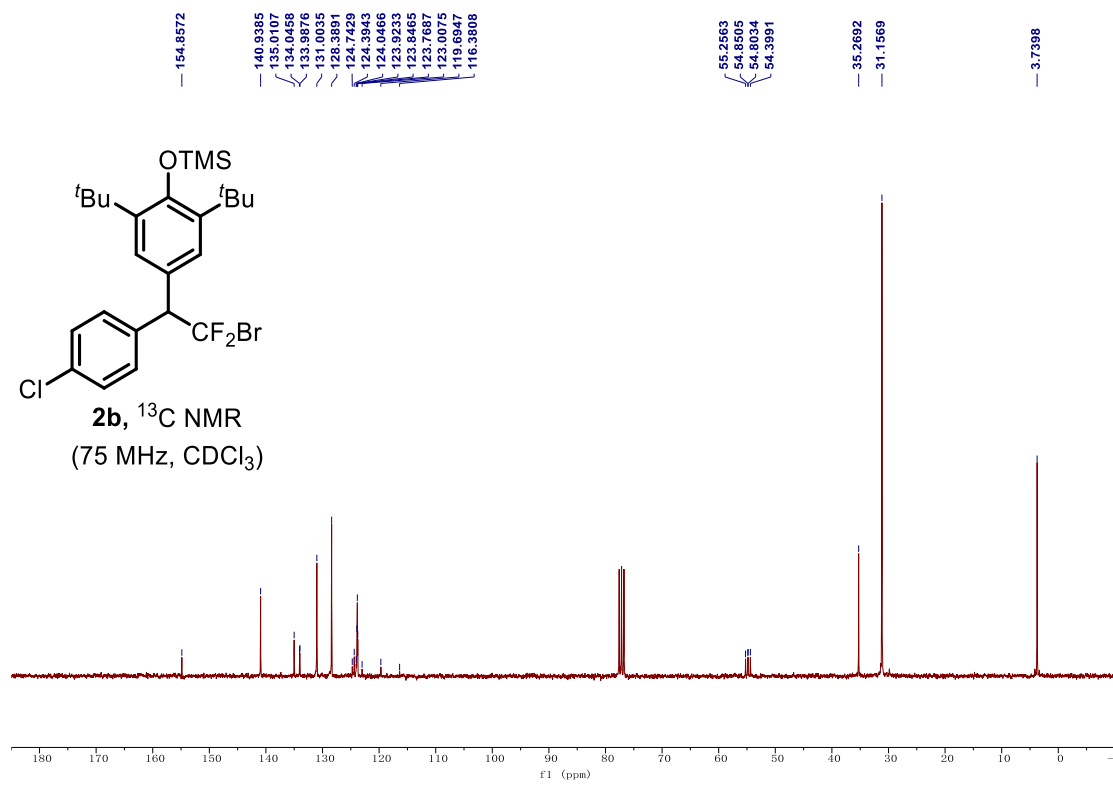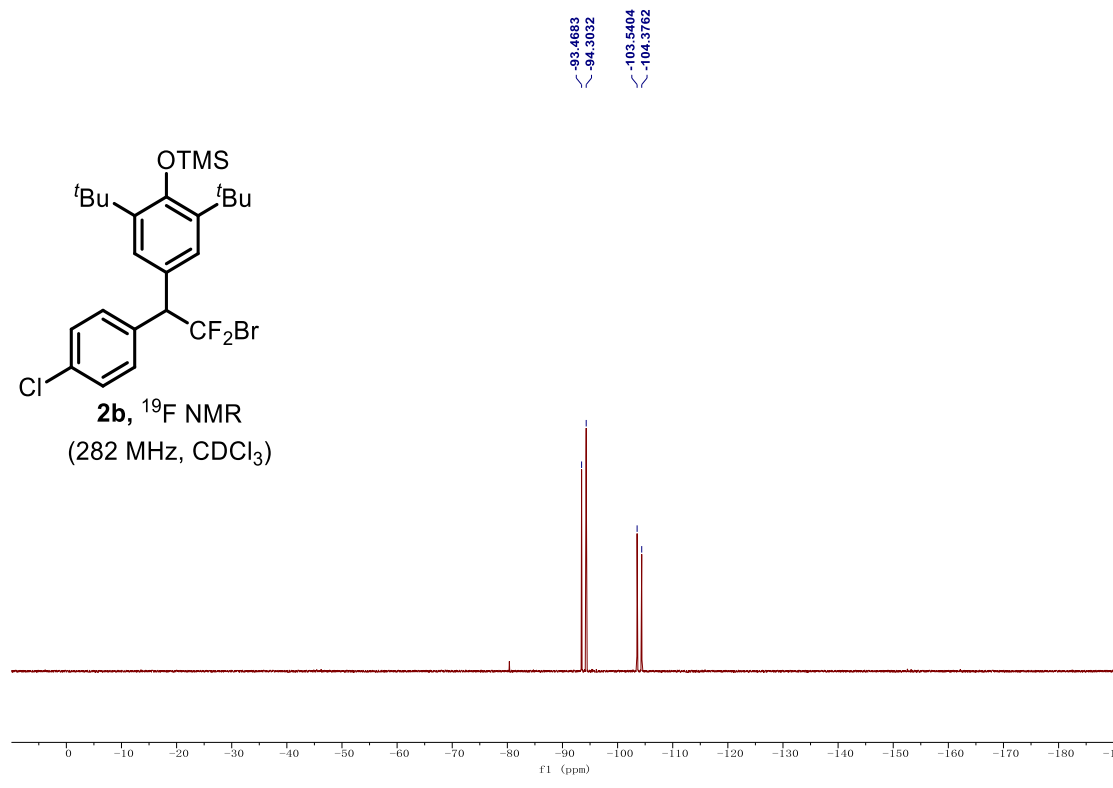

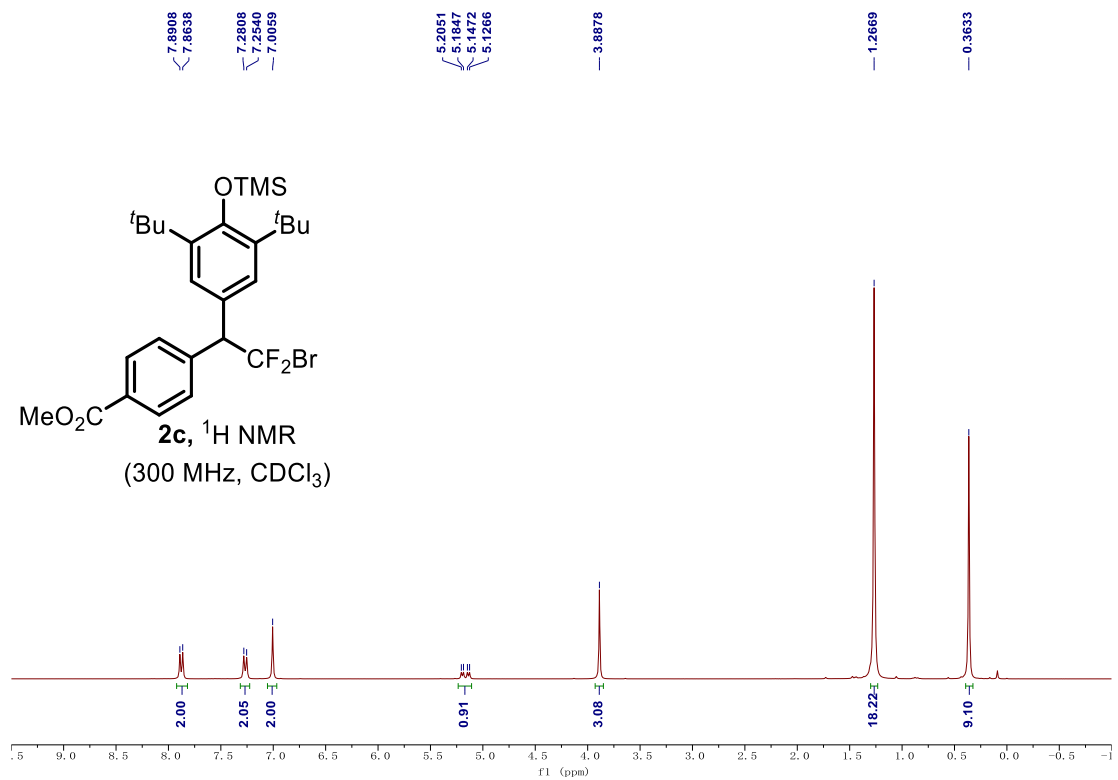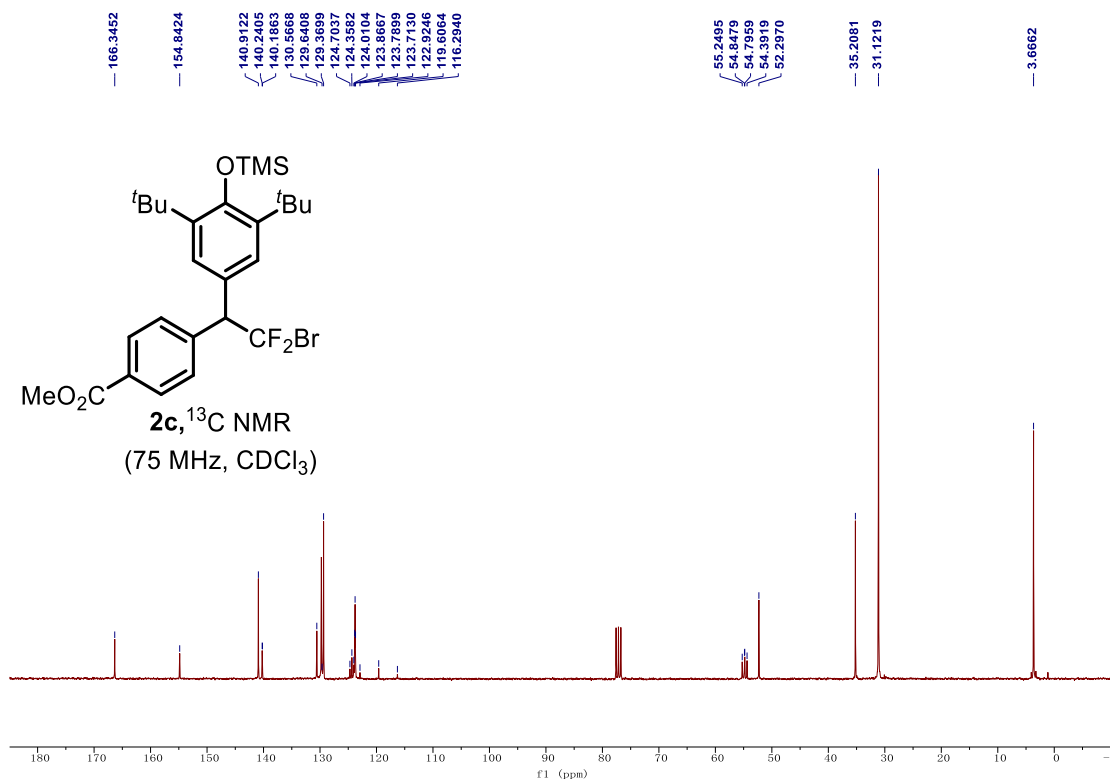

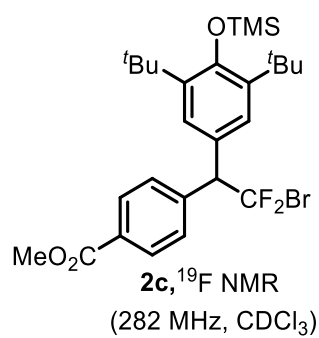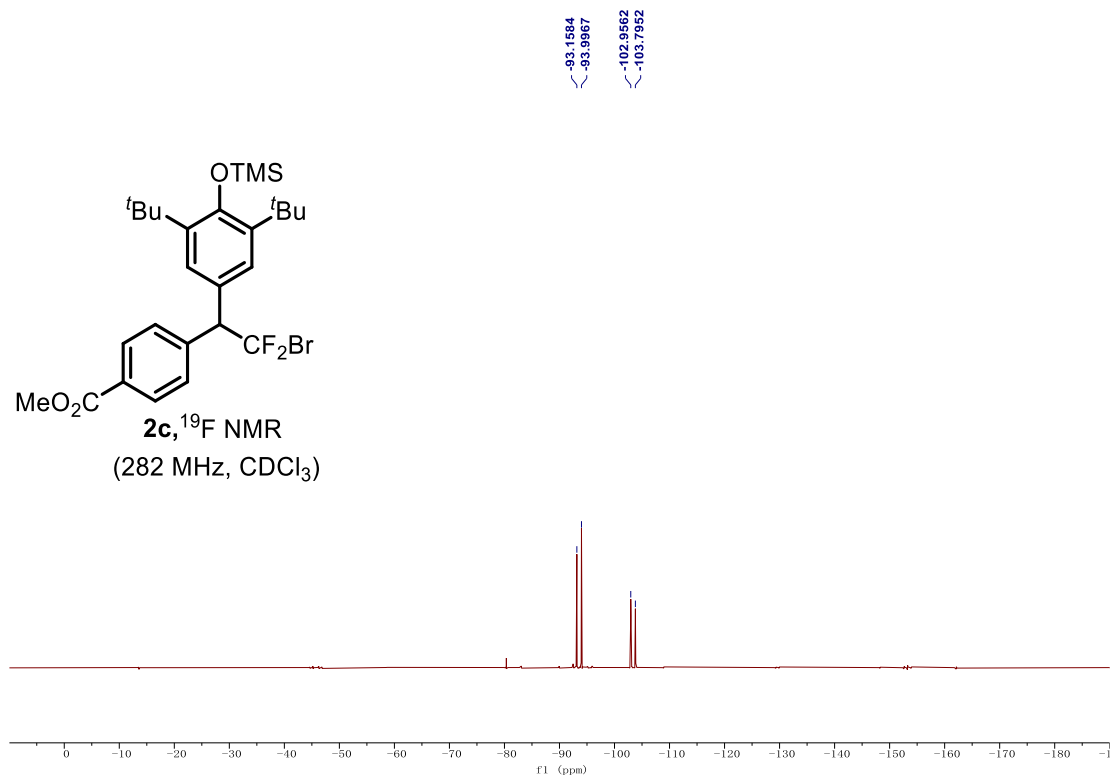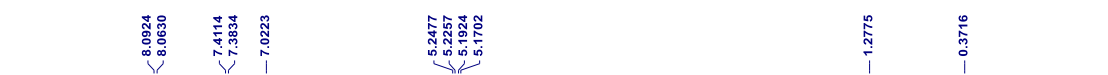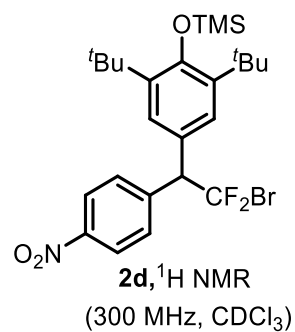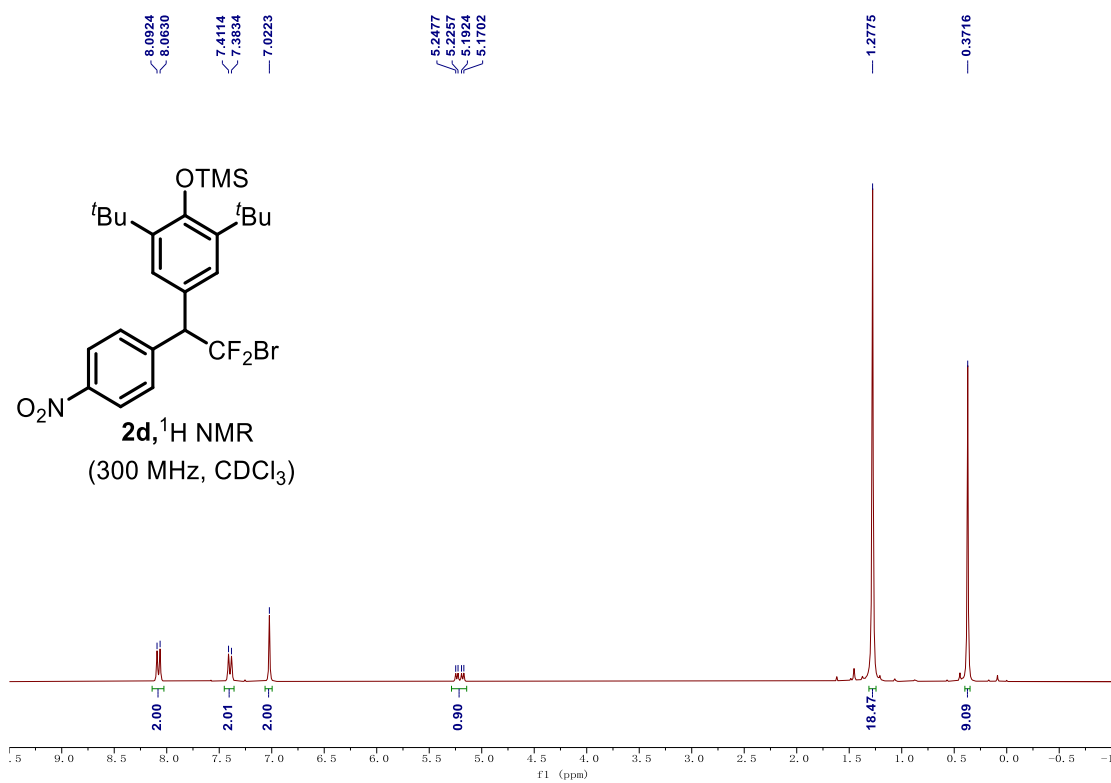

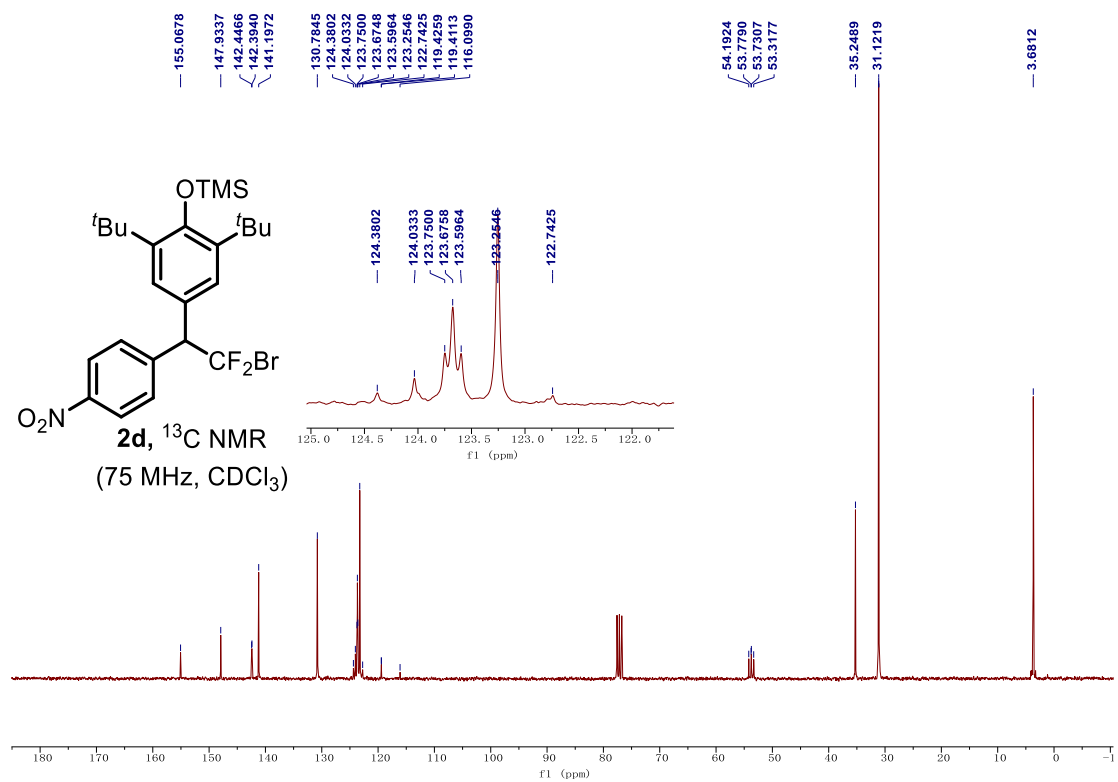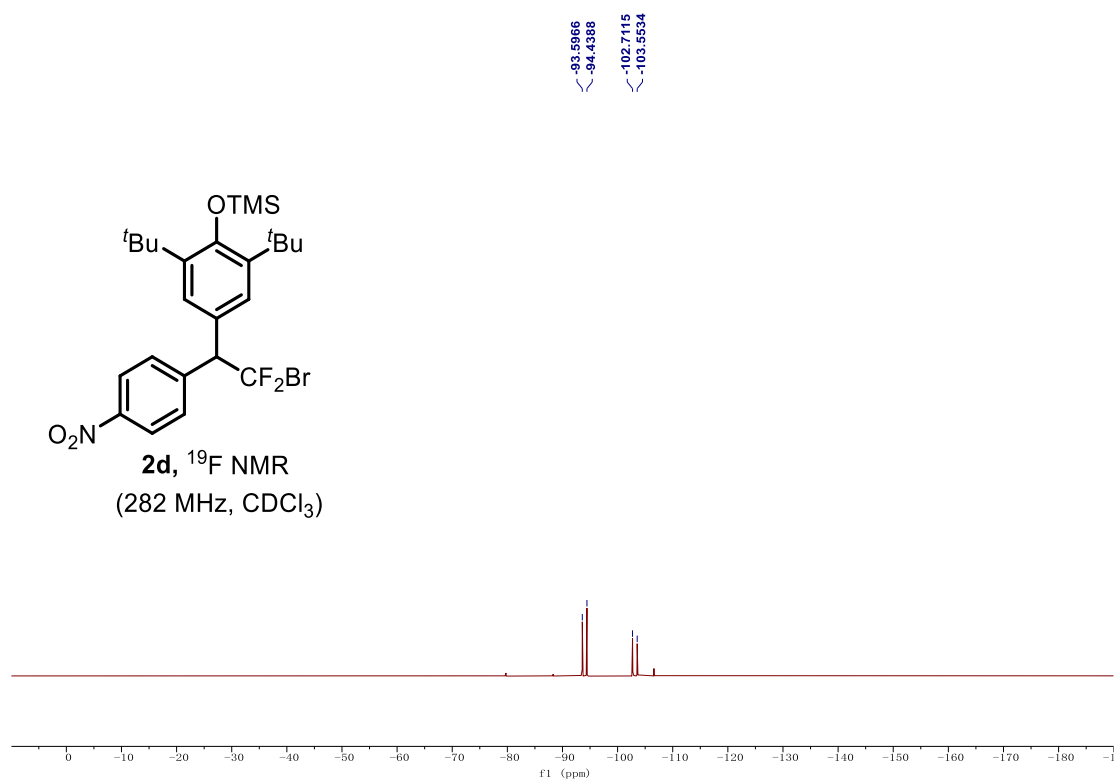

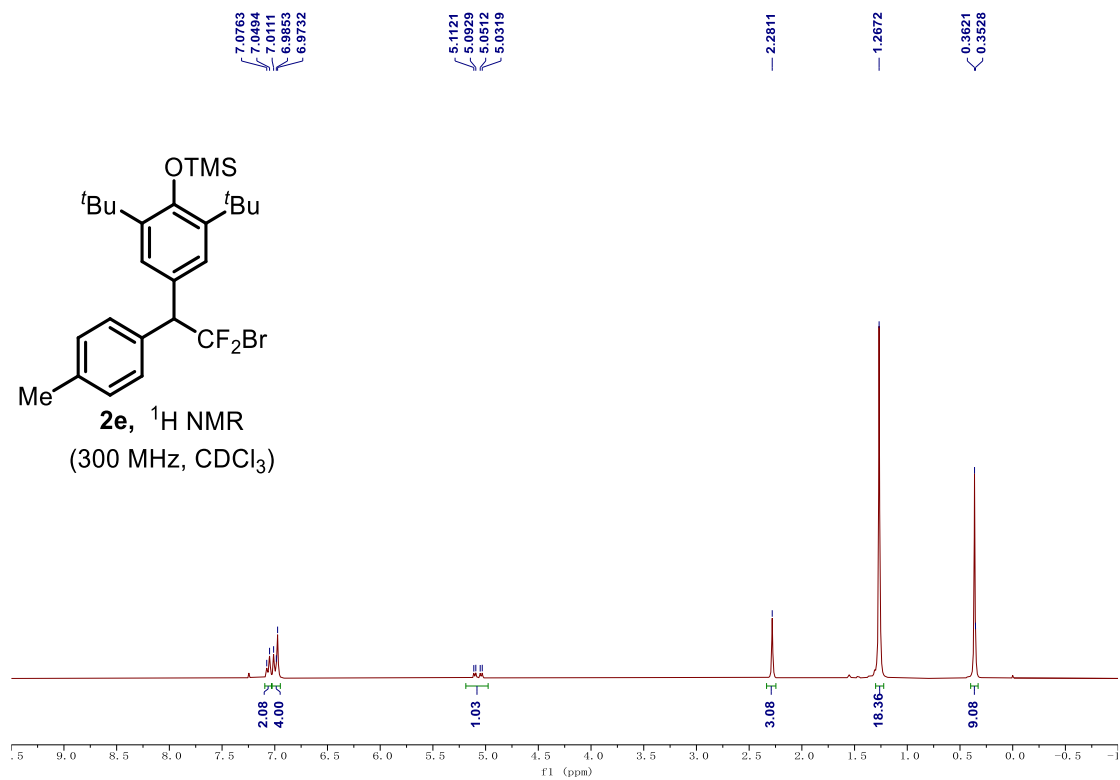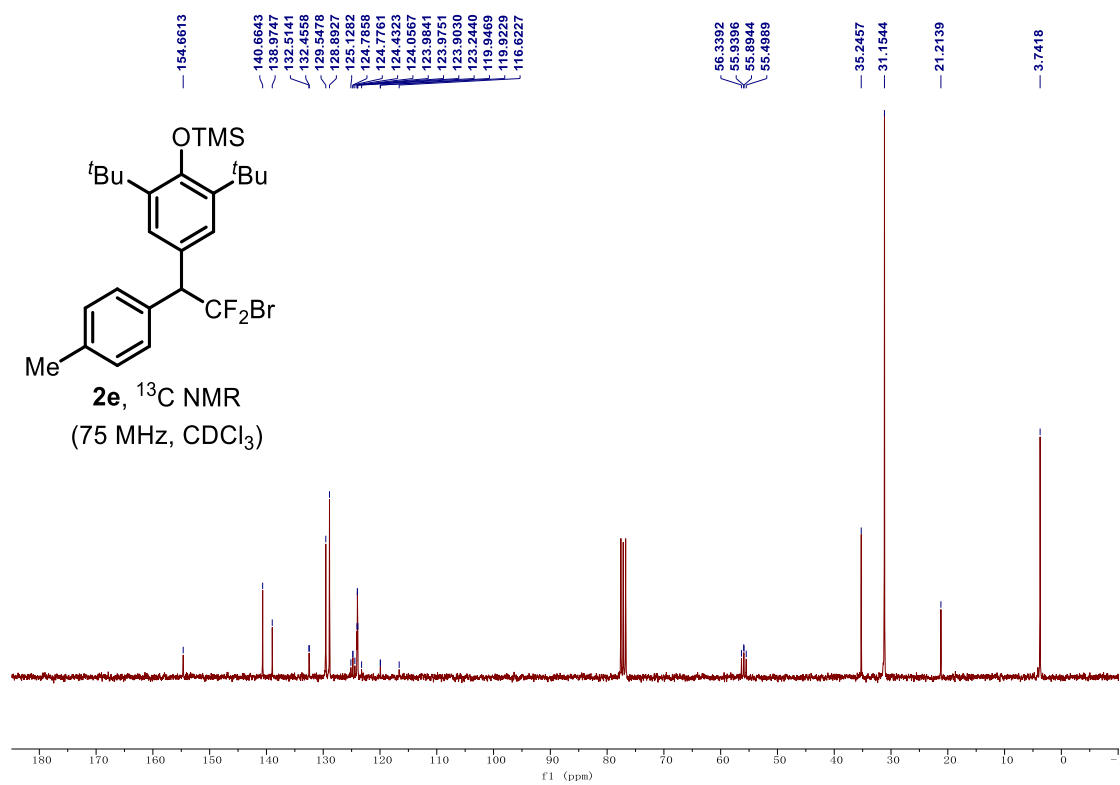

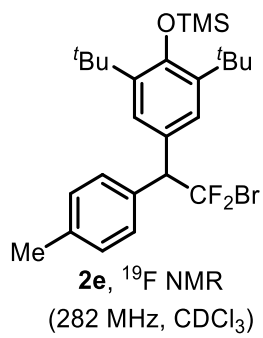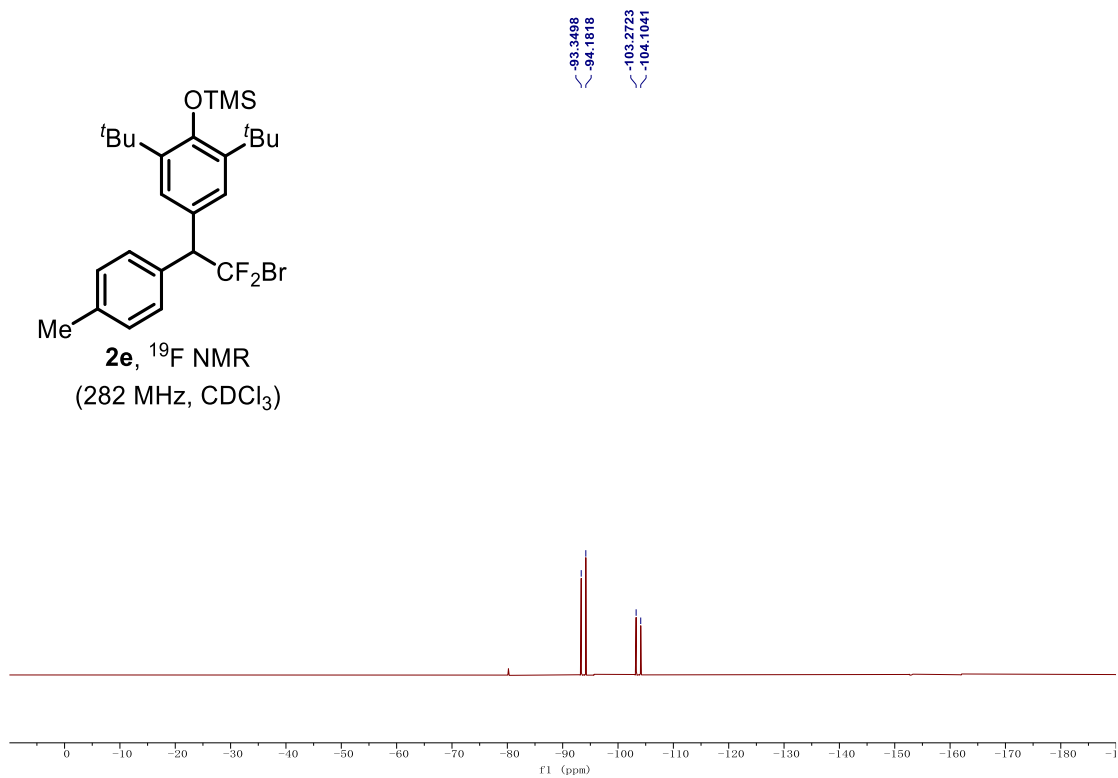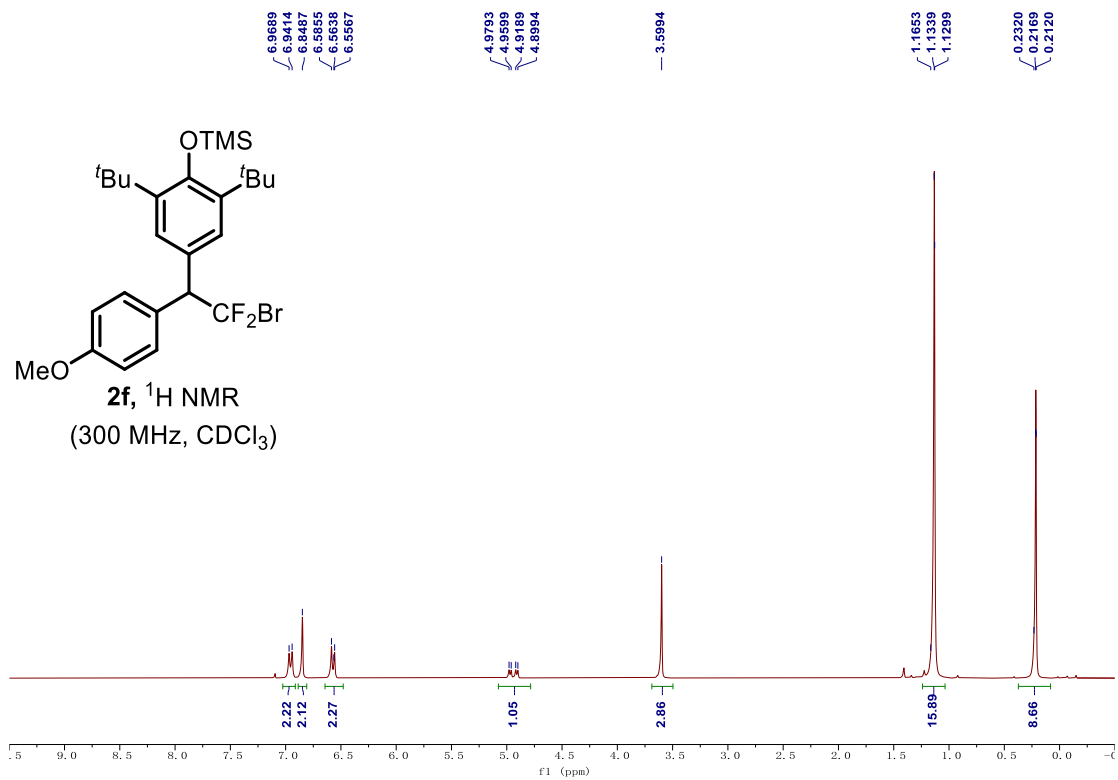

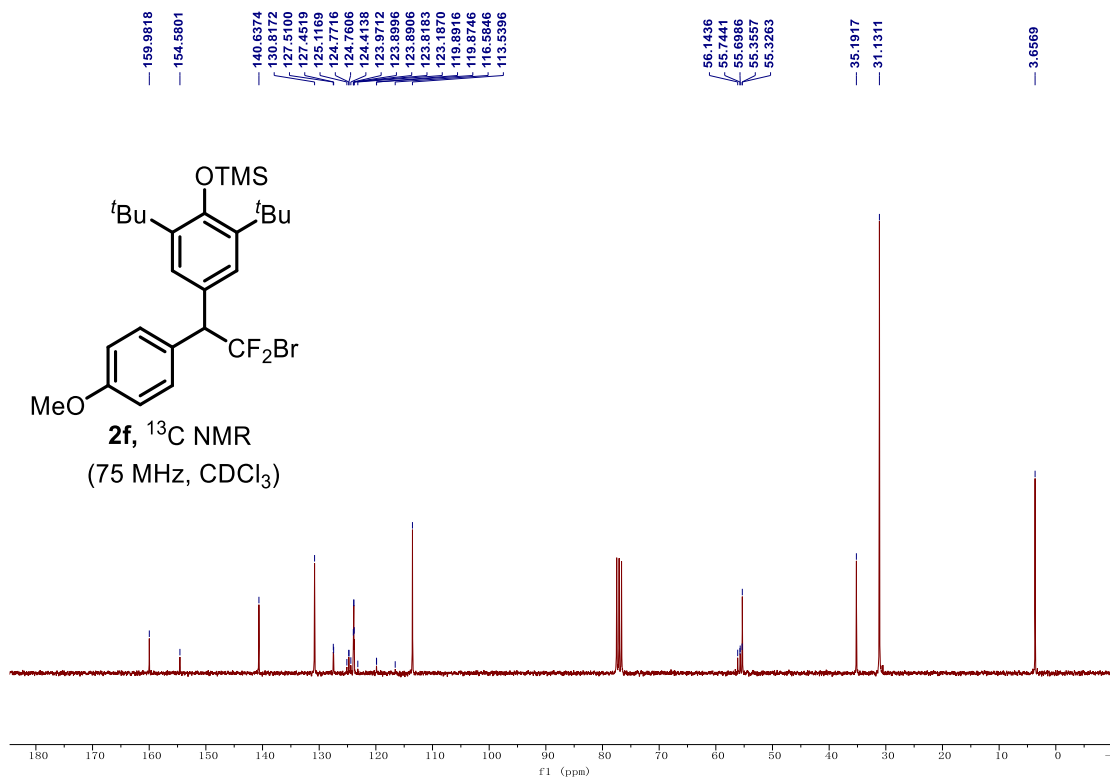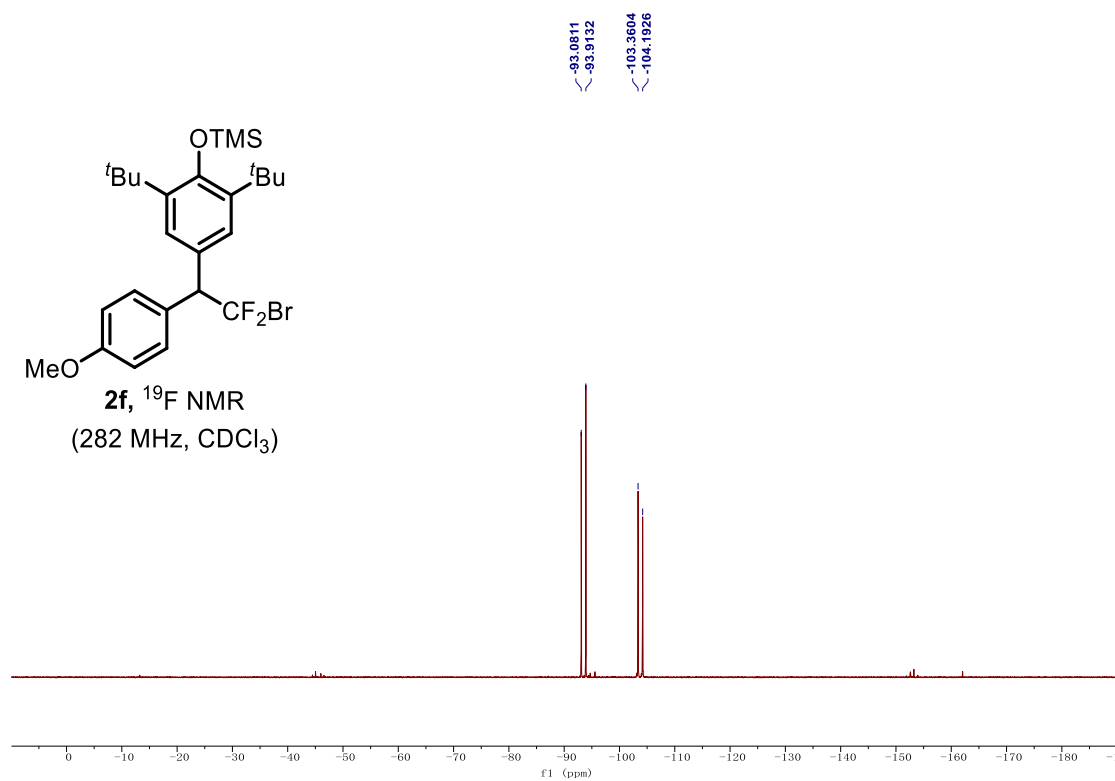

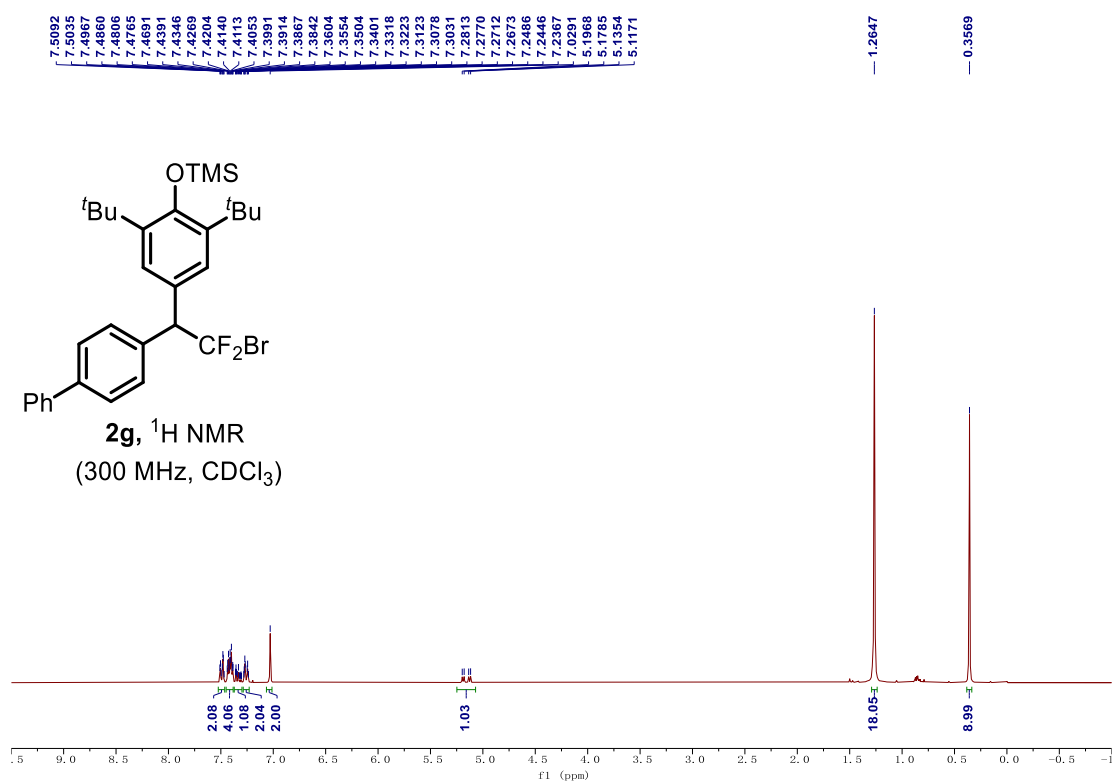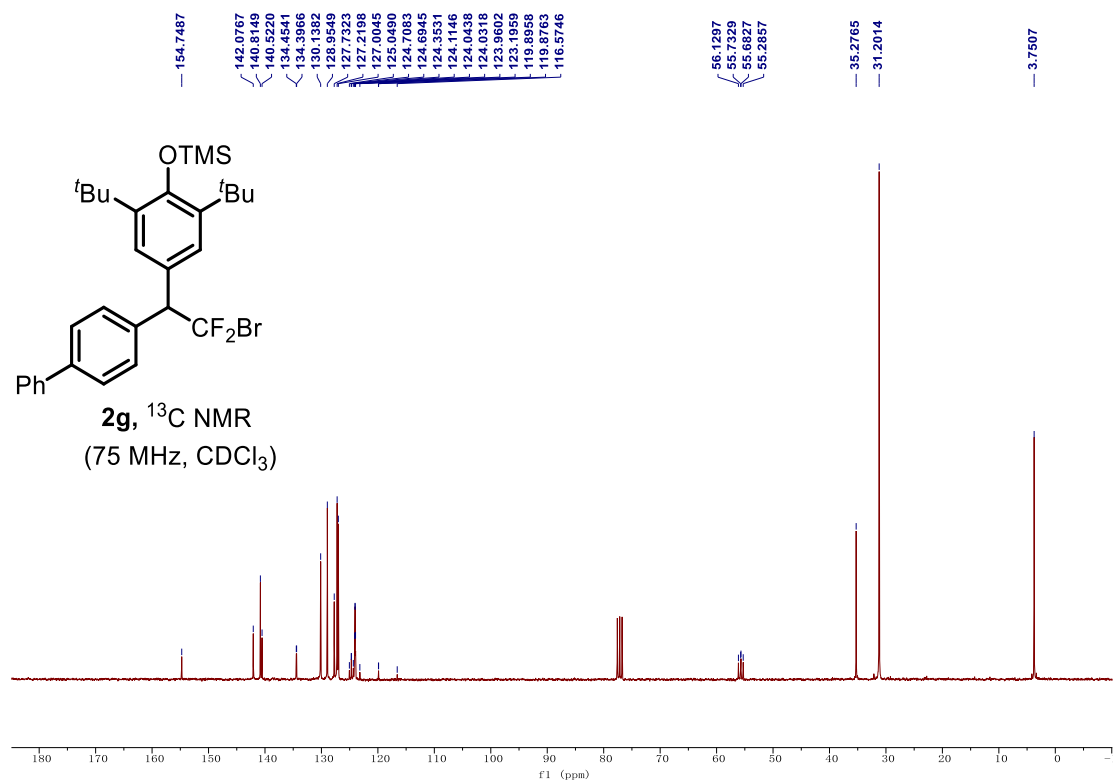



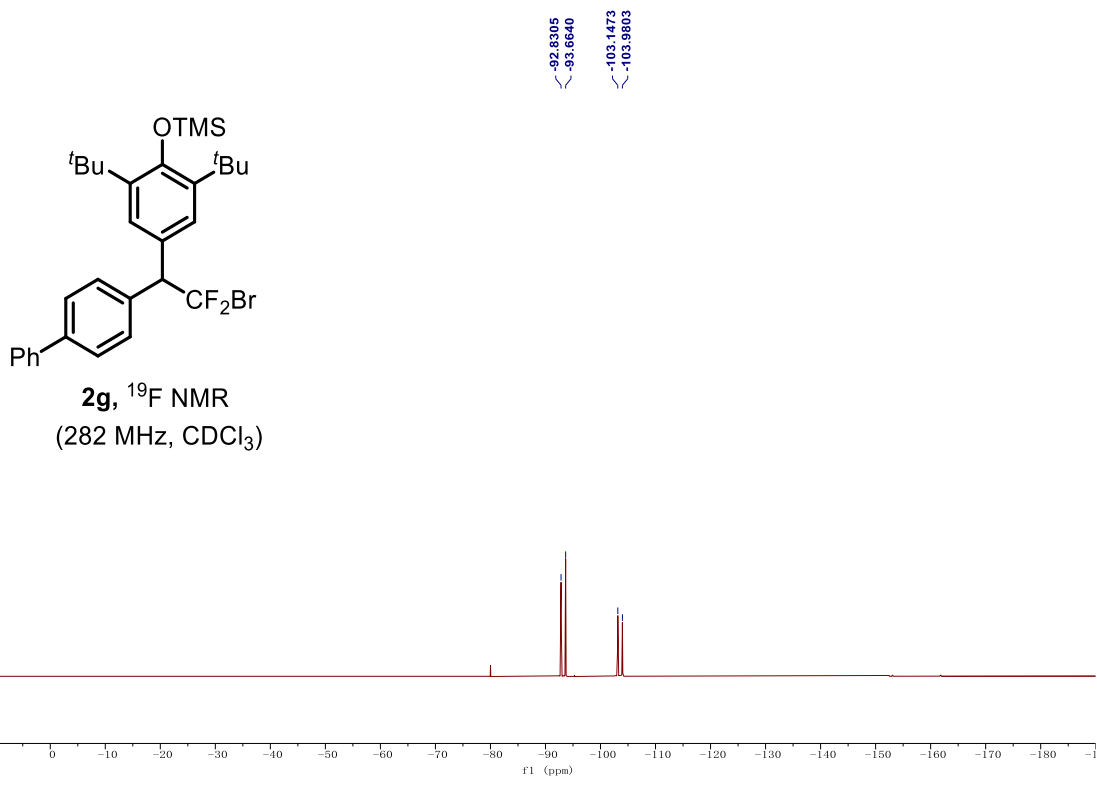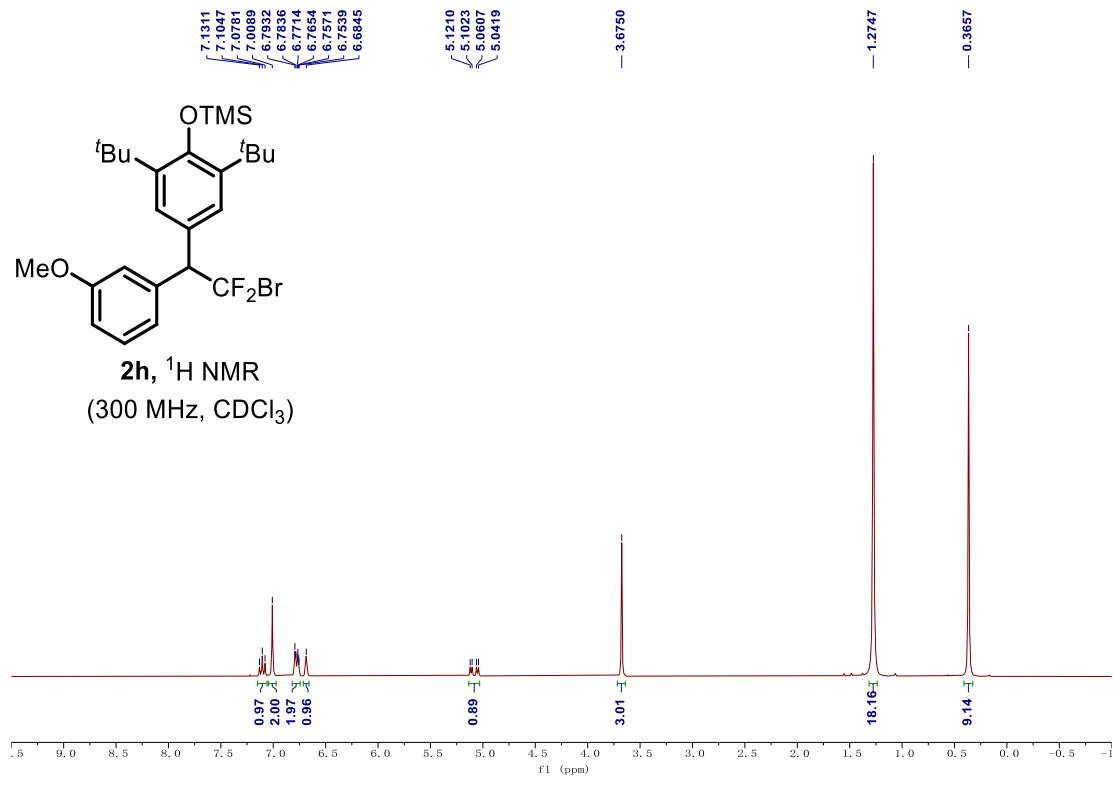

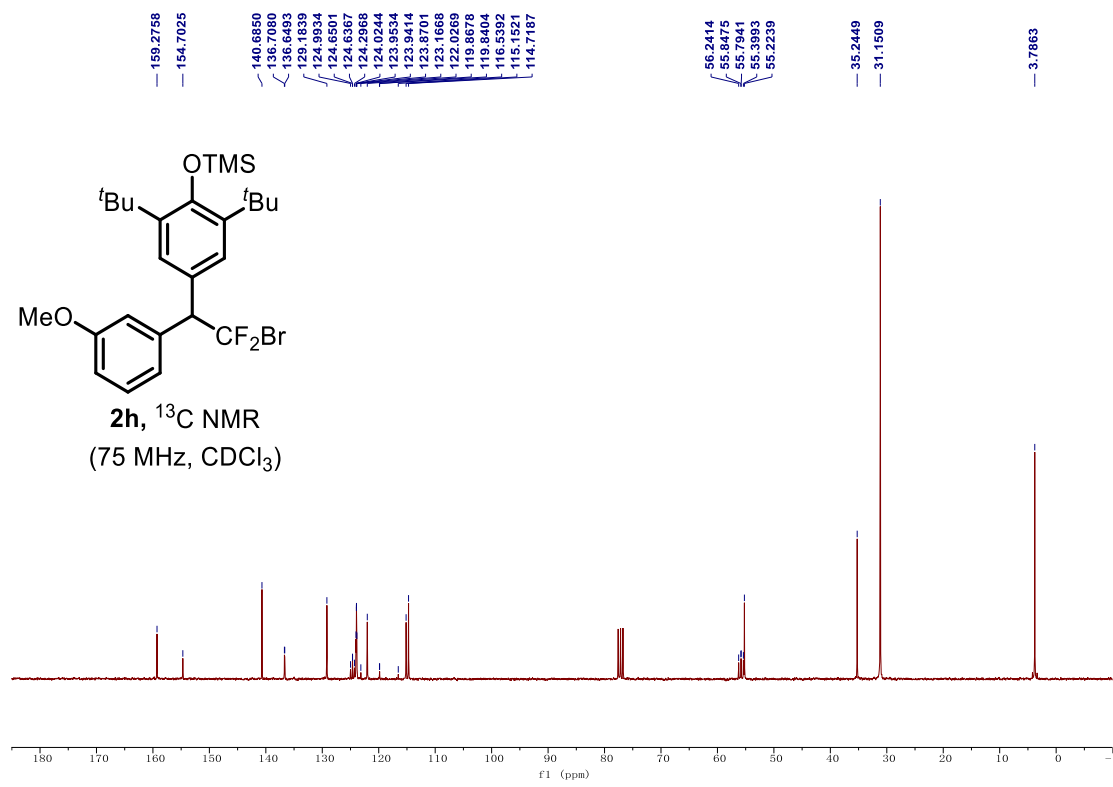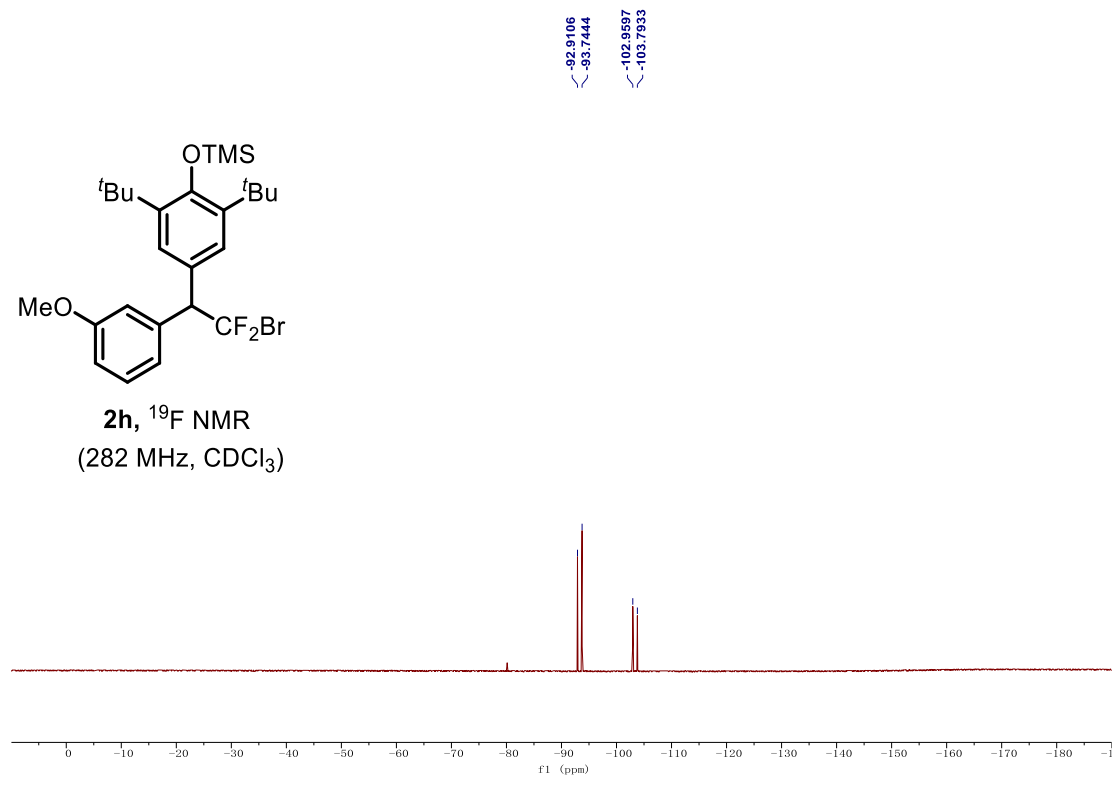

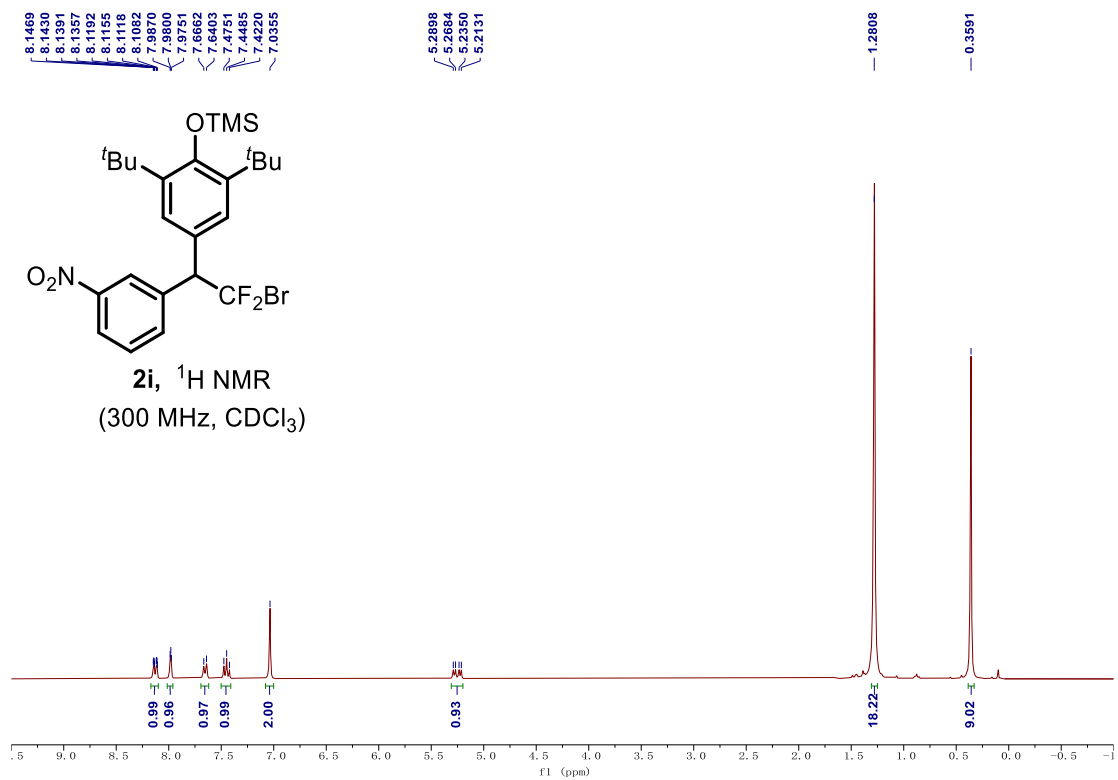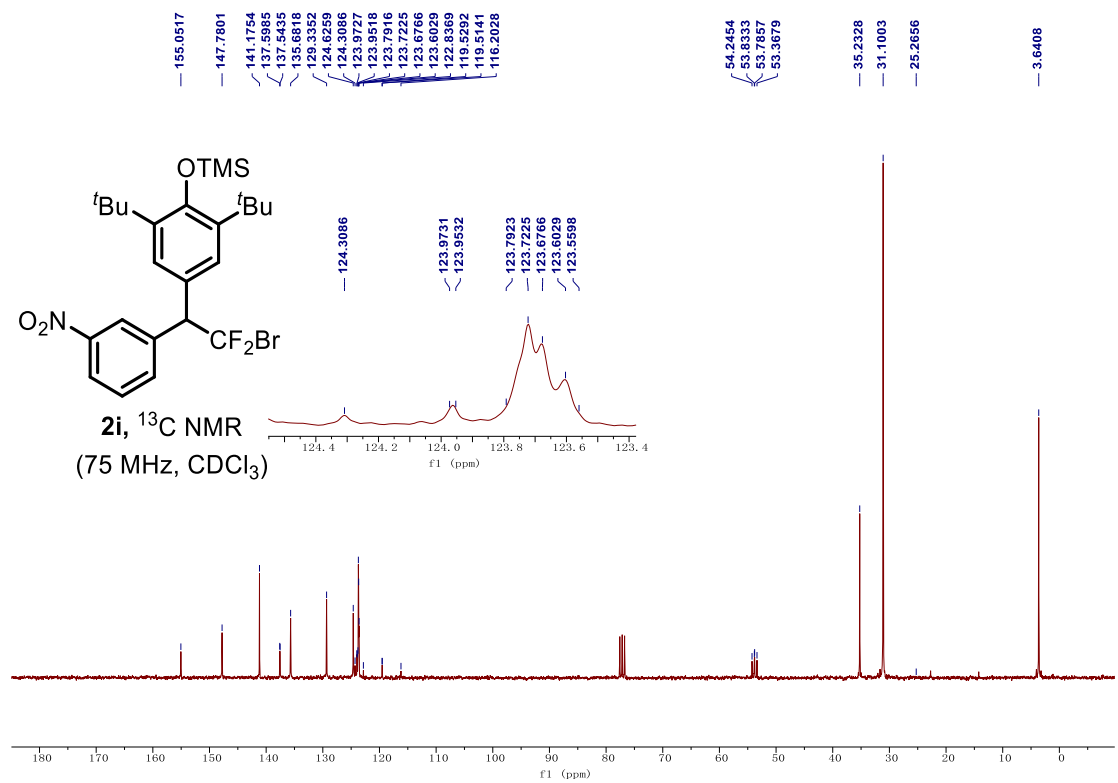

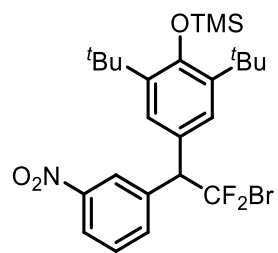

**2i**,  $^{19}\text{F}$  NMR  
(282 MHz,  $\text{CDCl}_3$ )

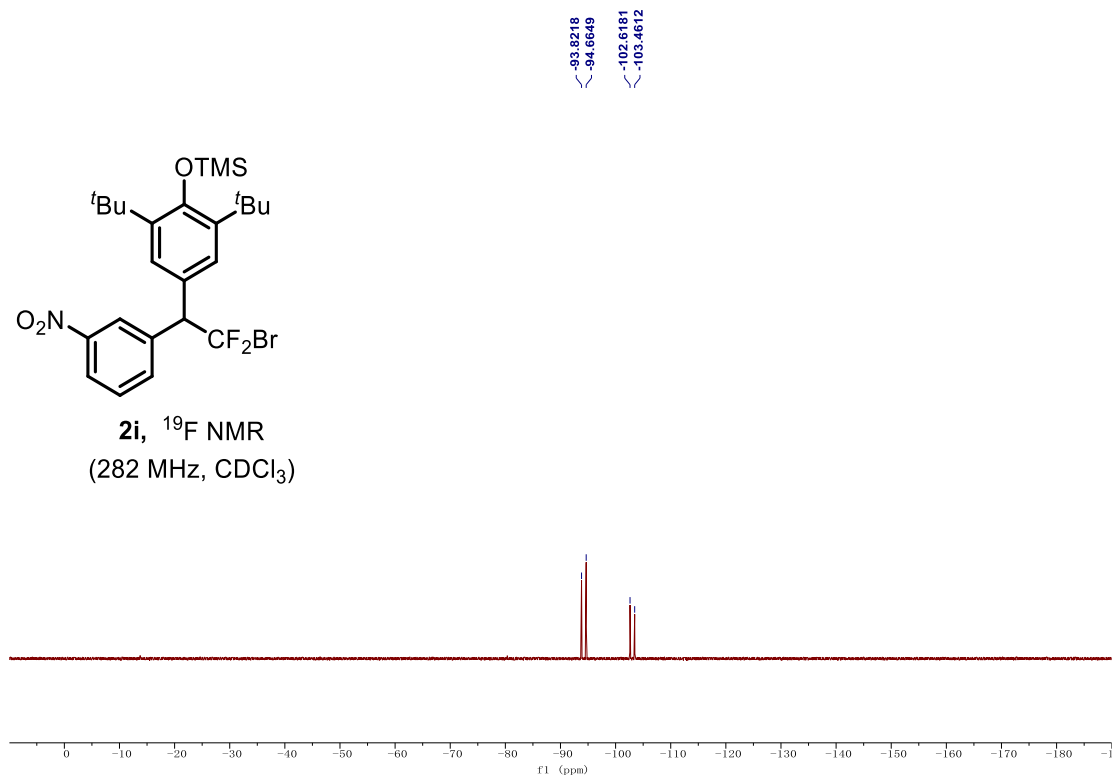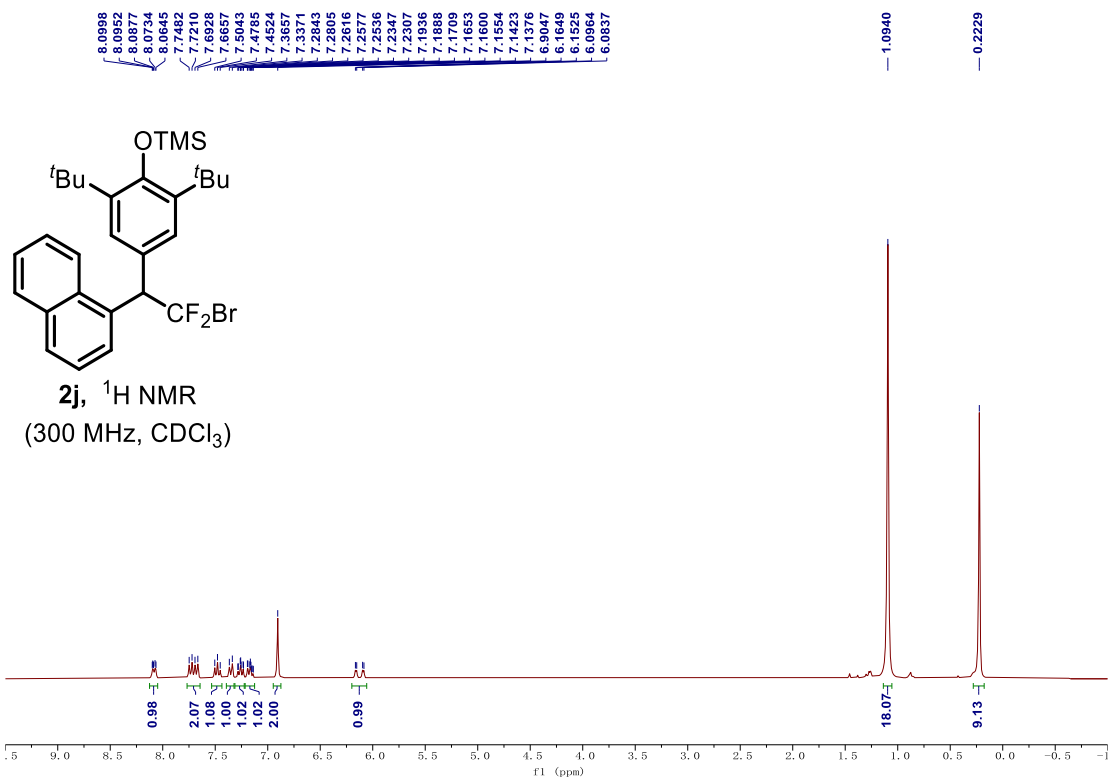

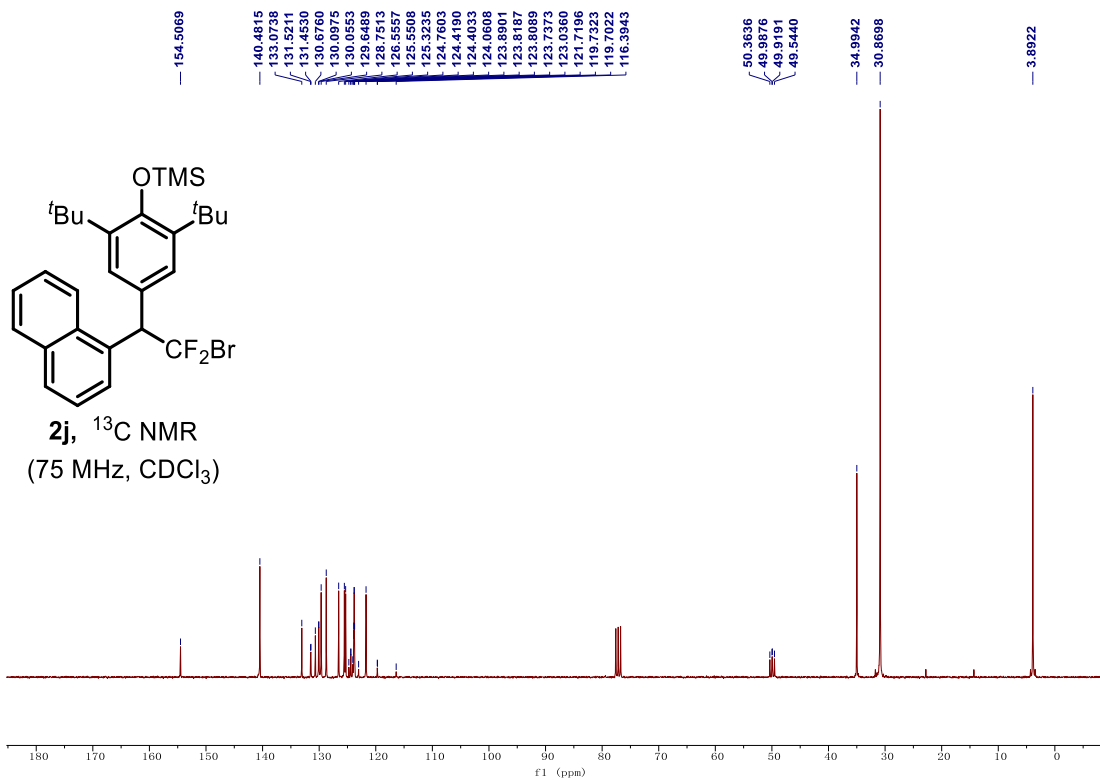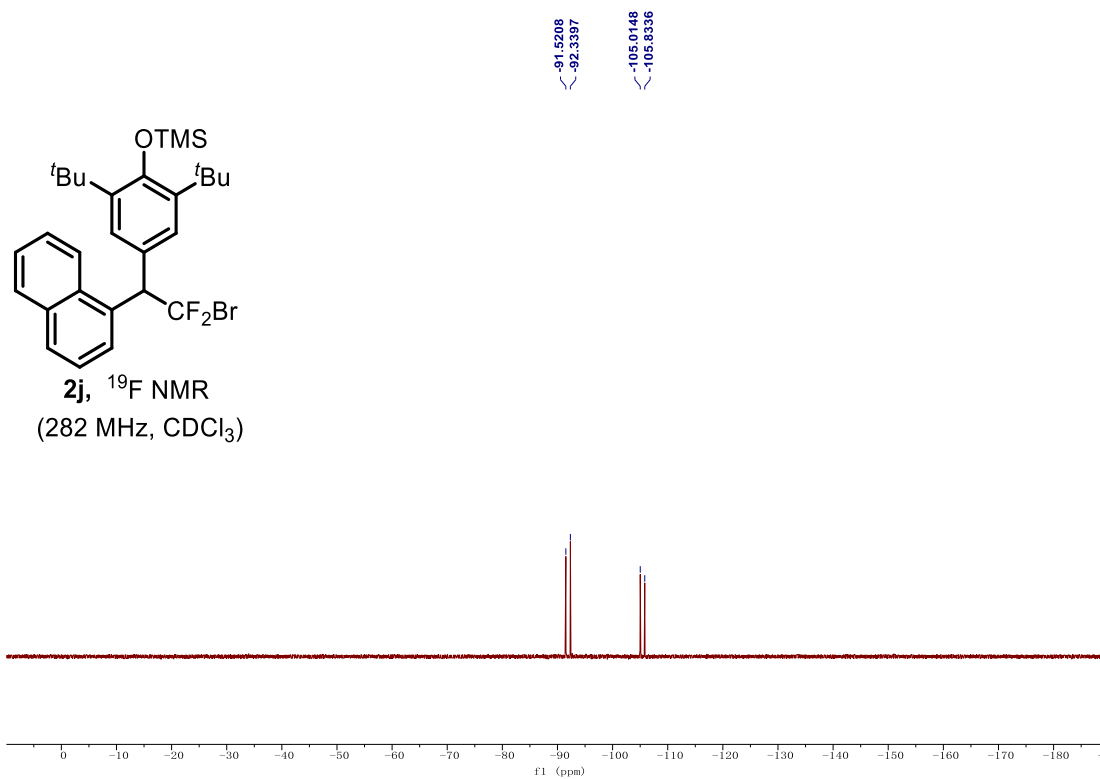

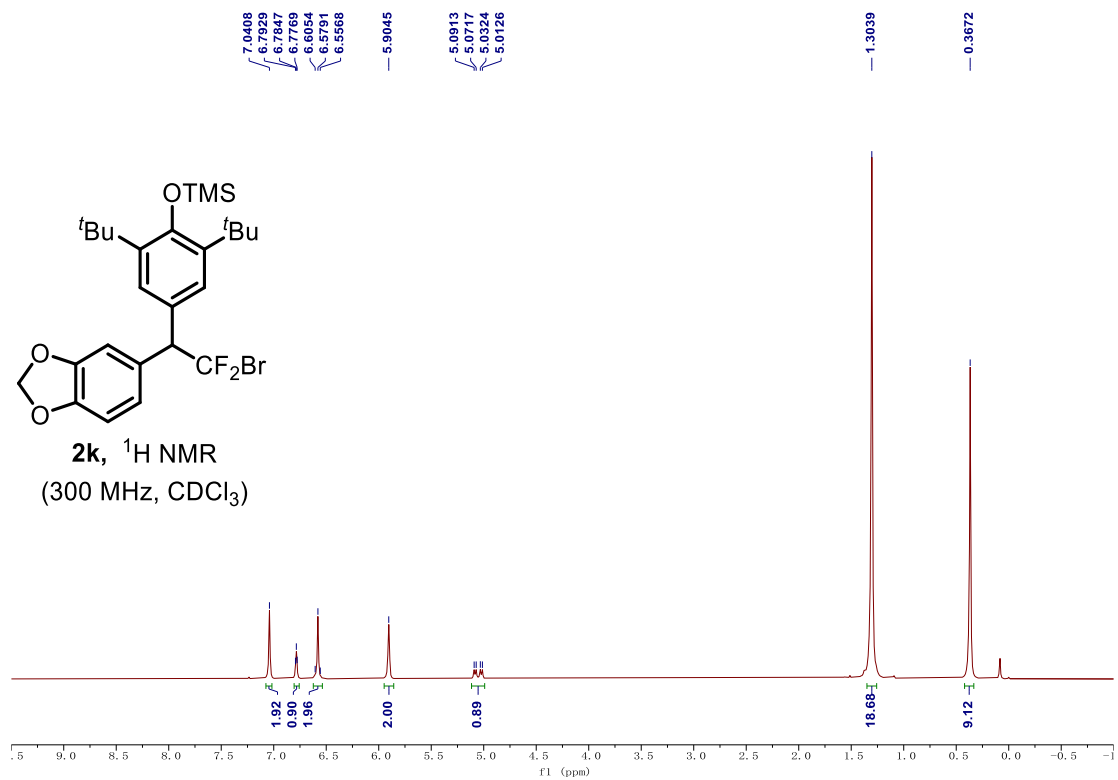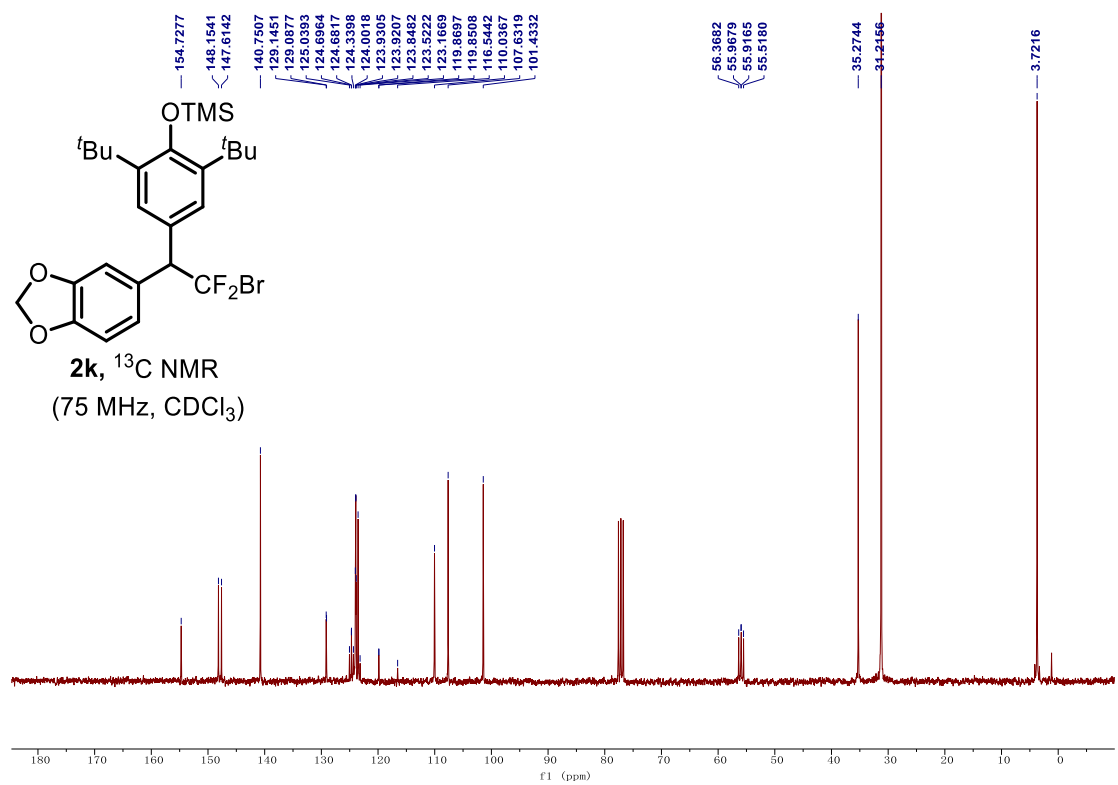

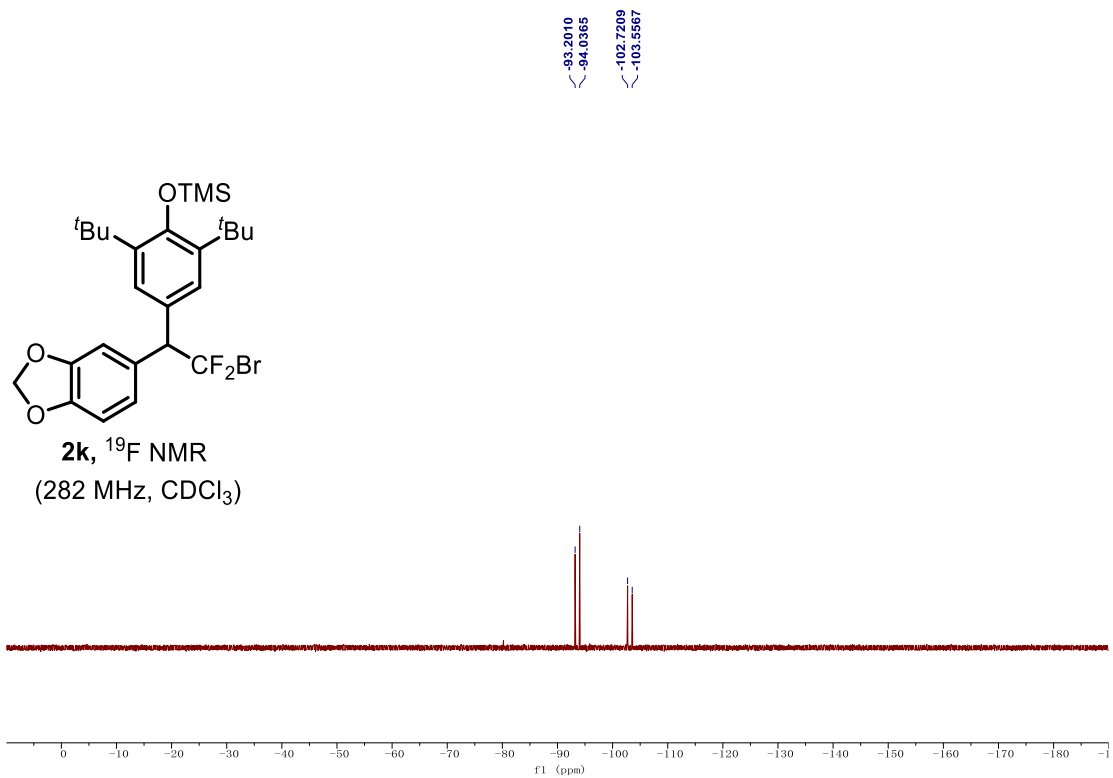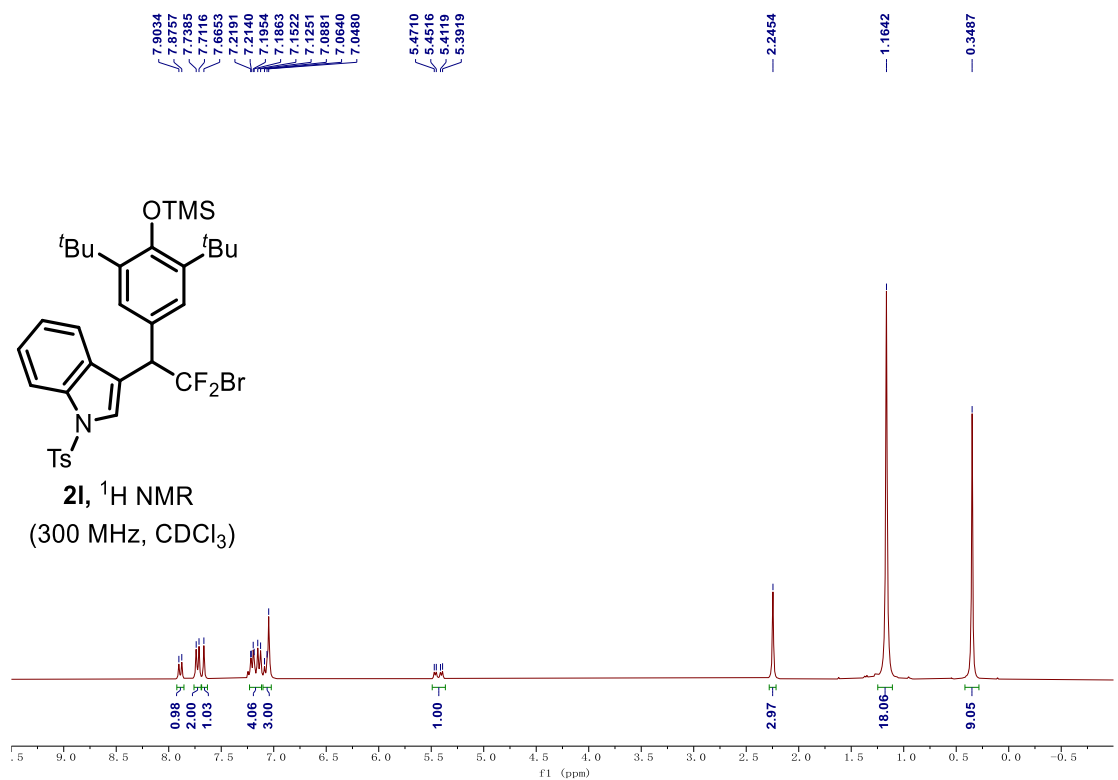

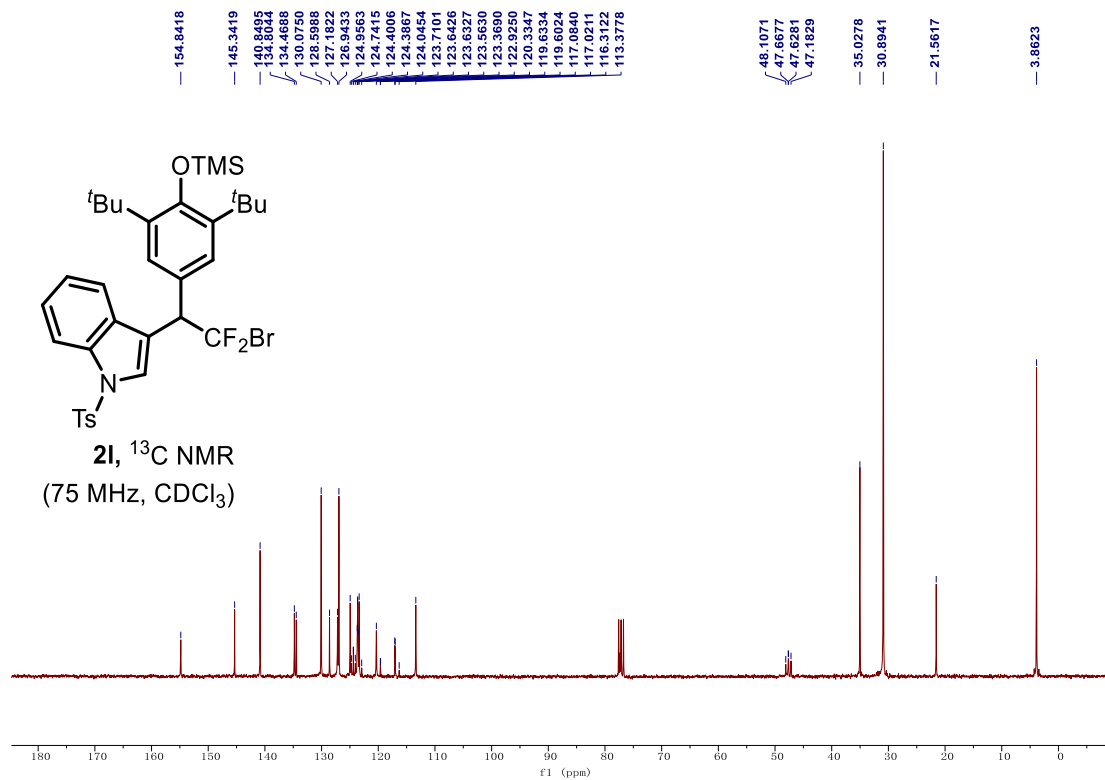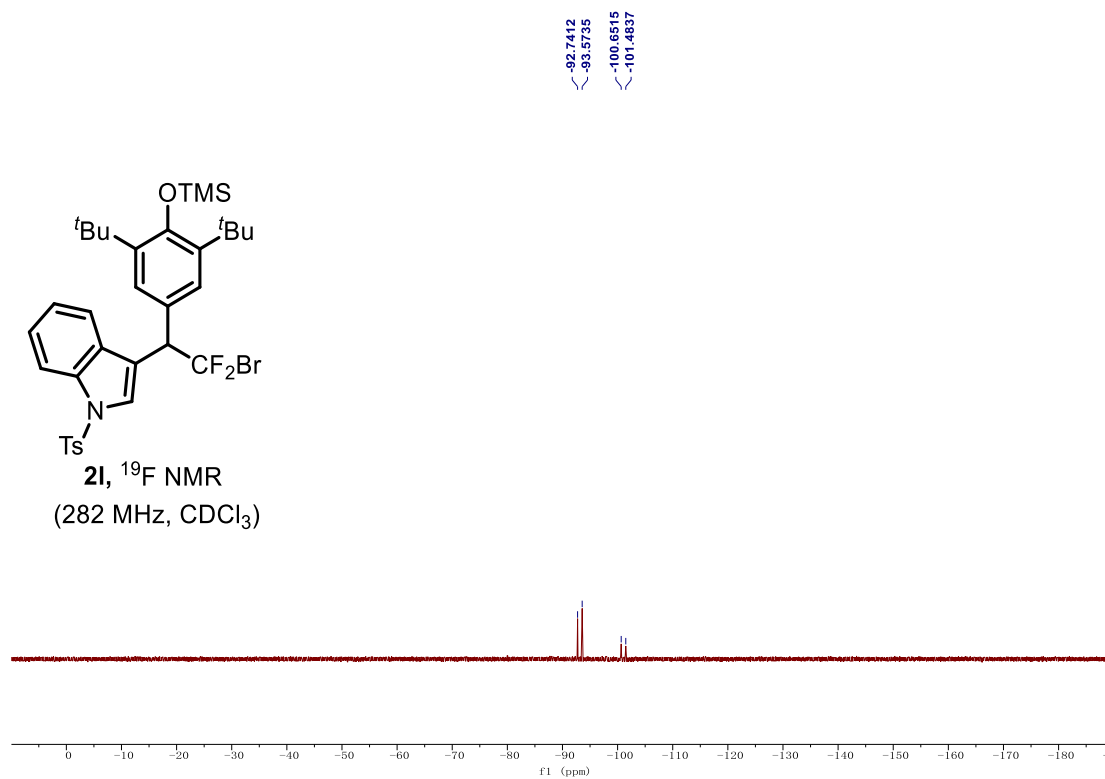



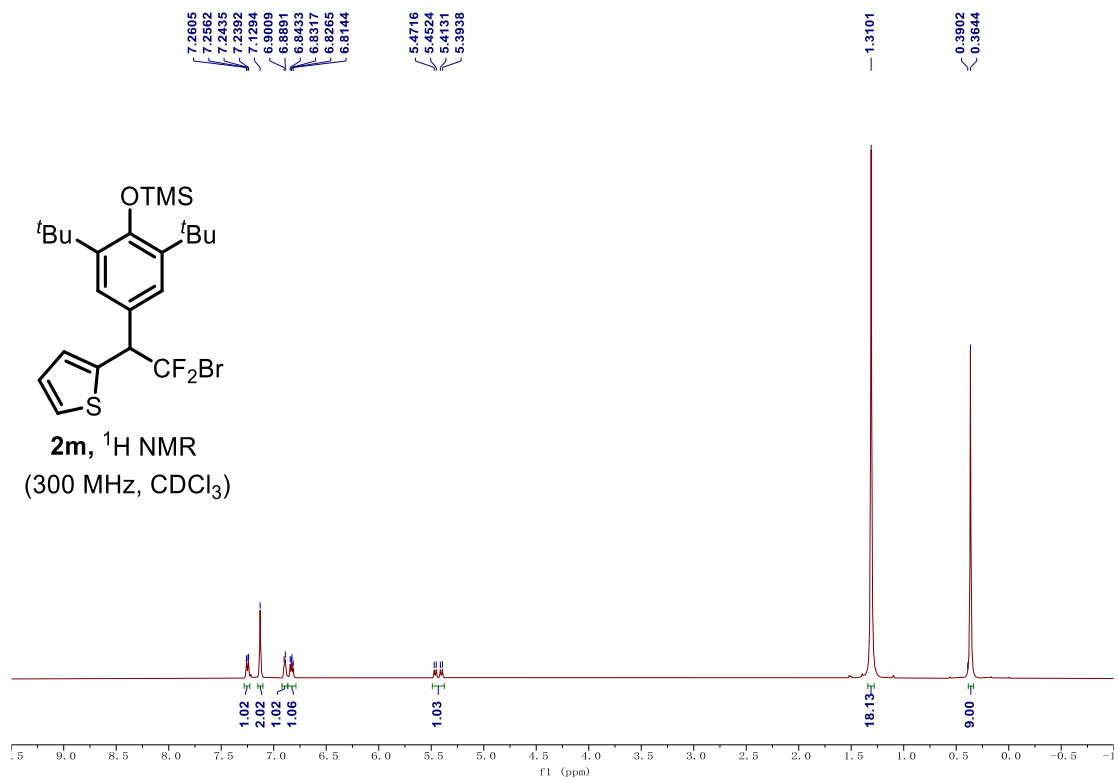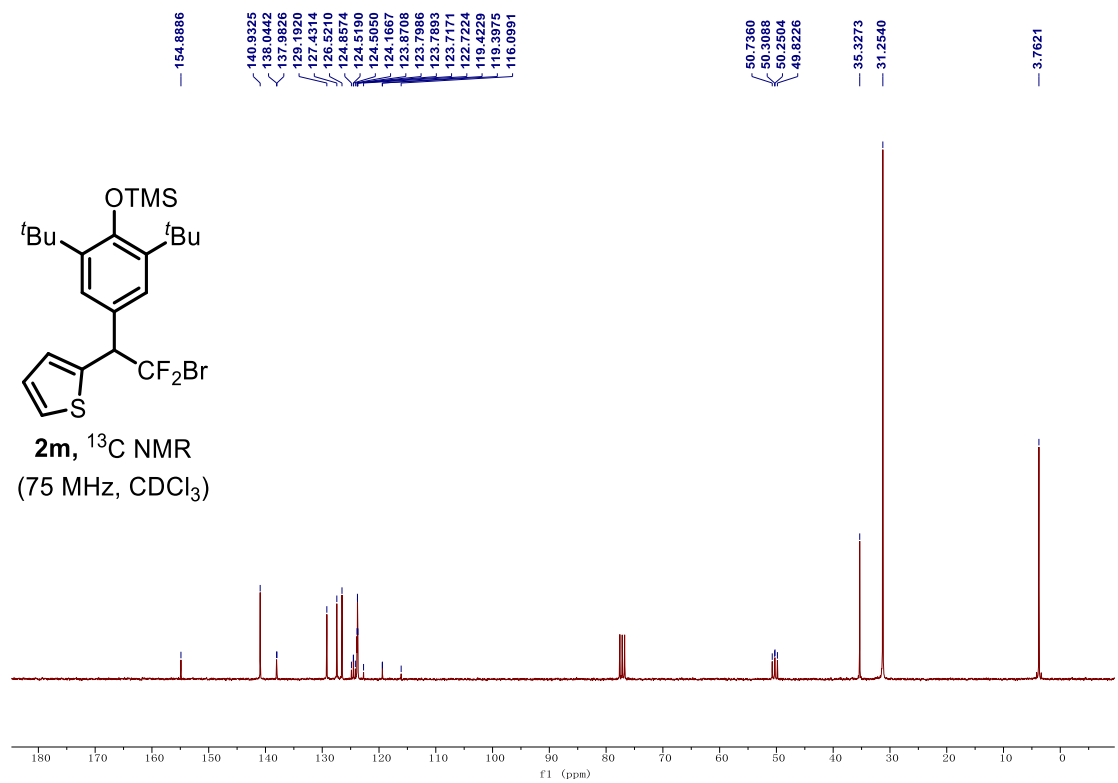

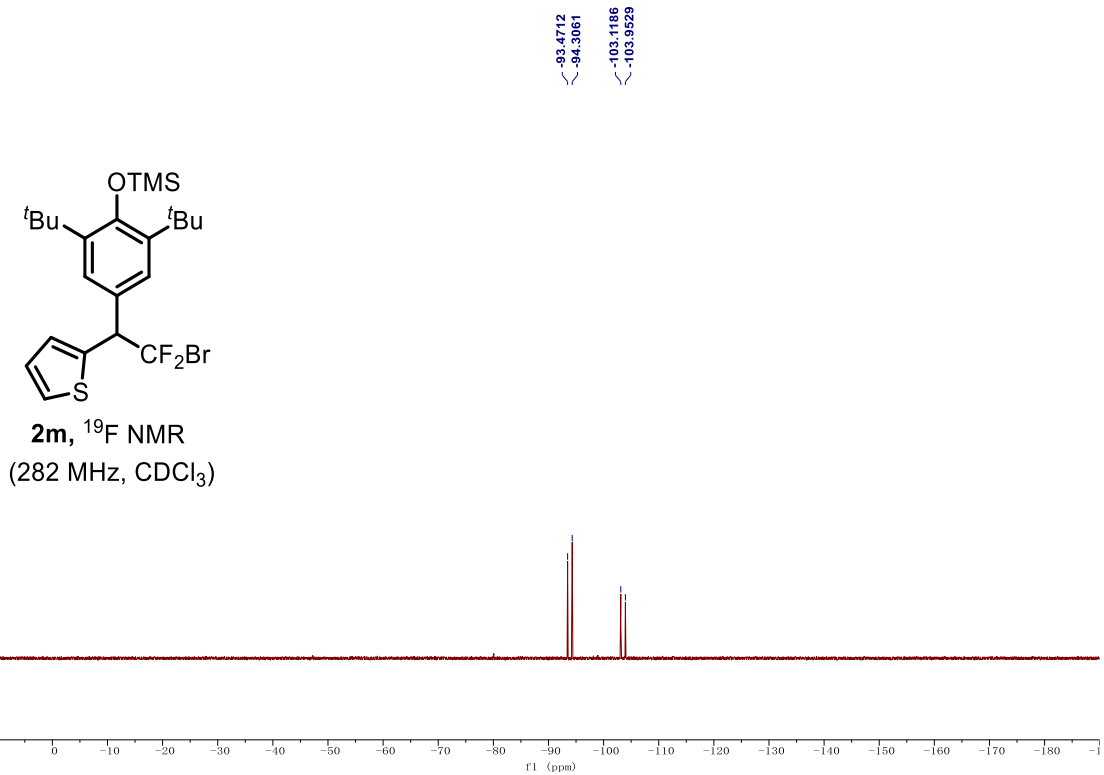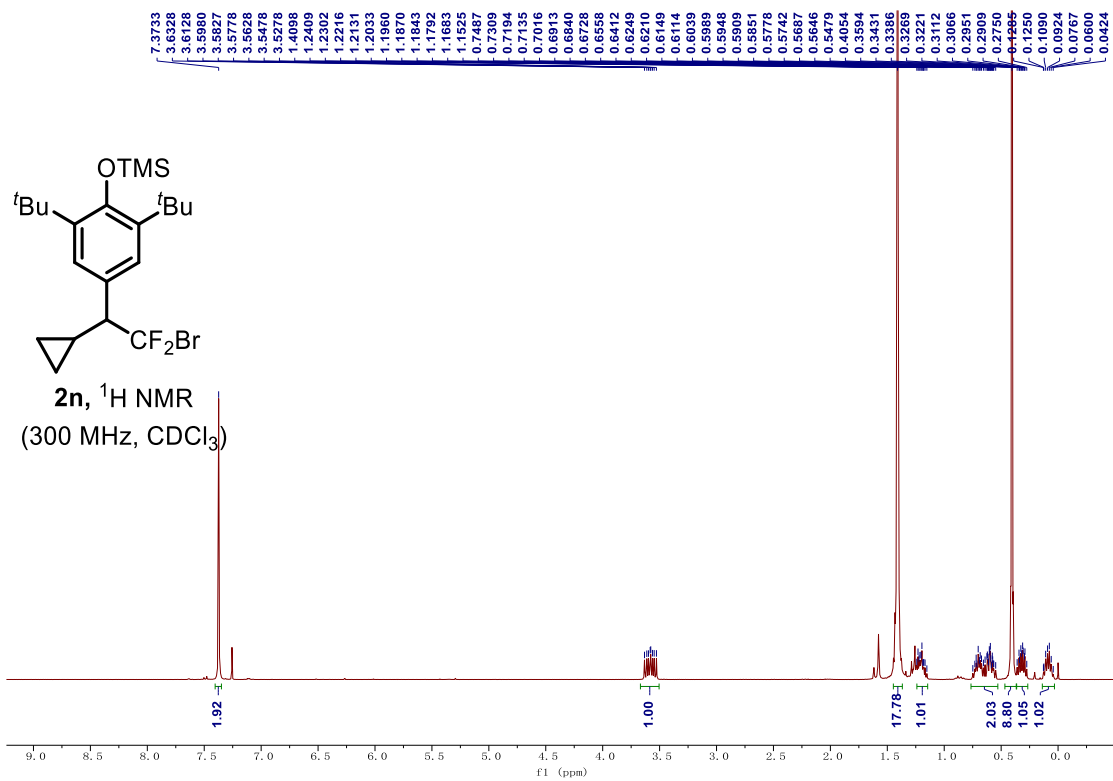

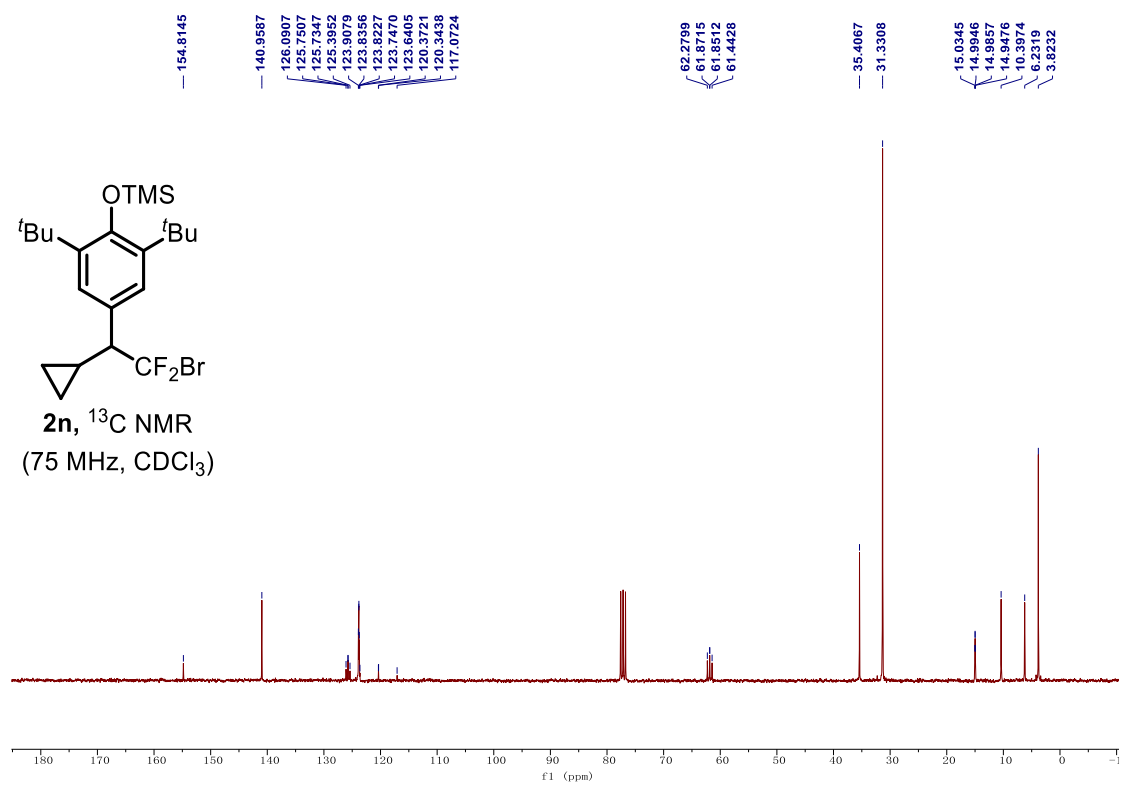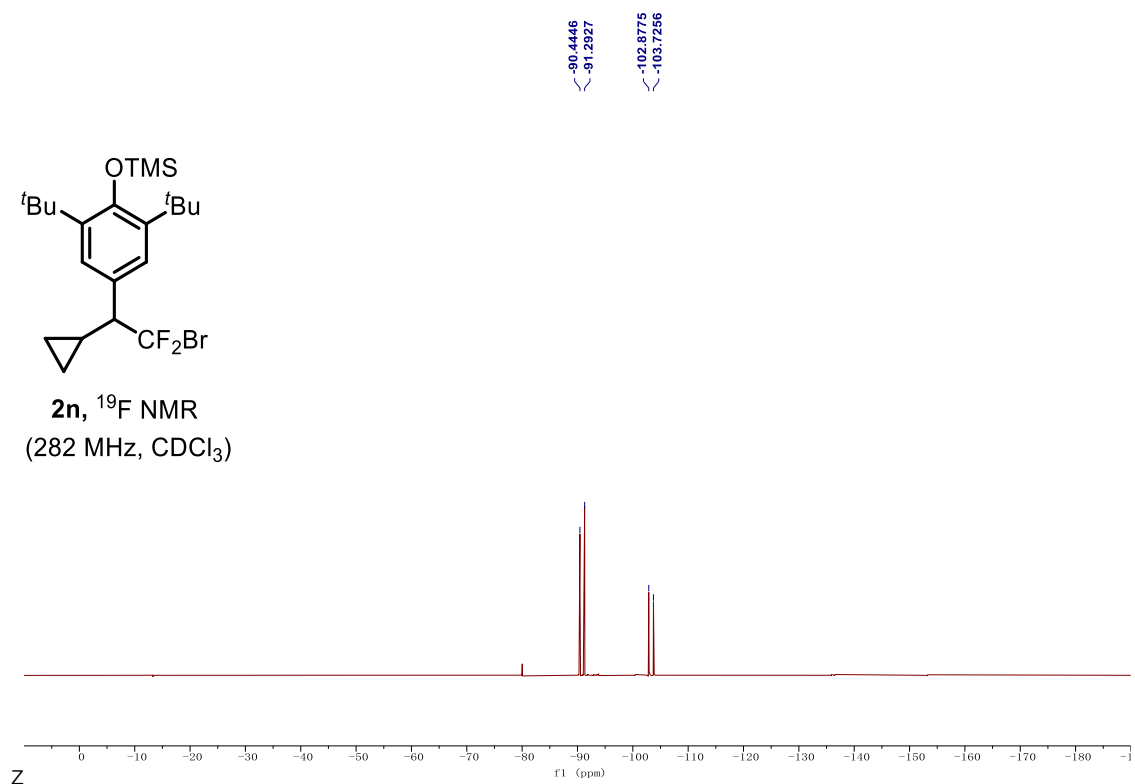

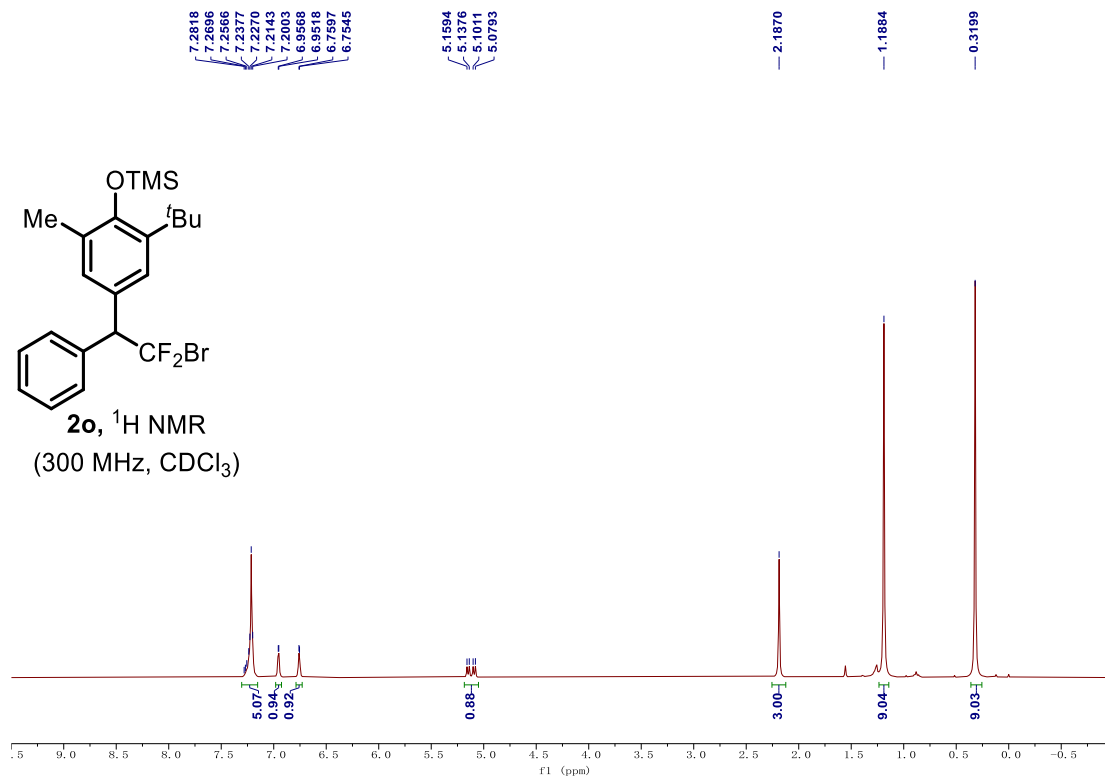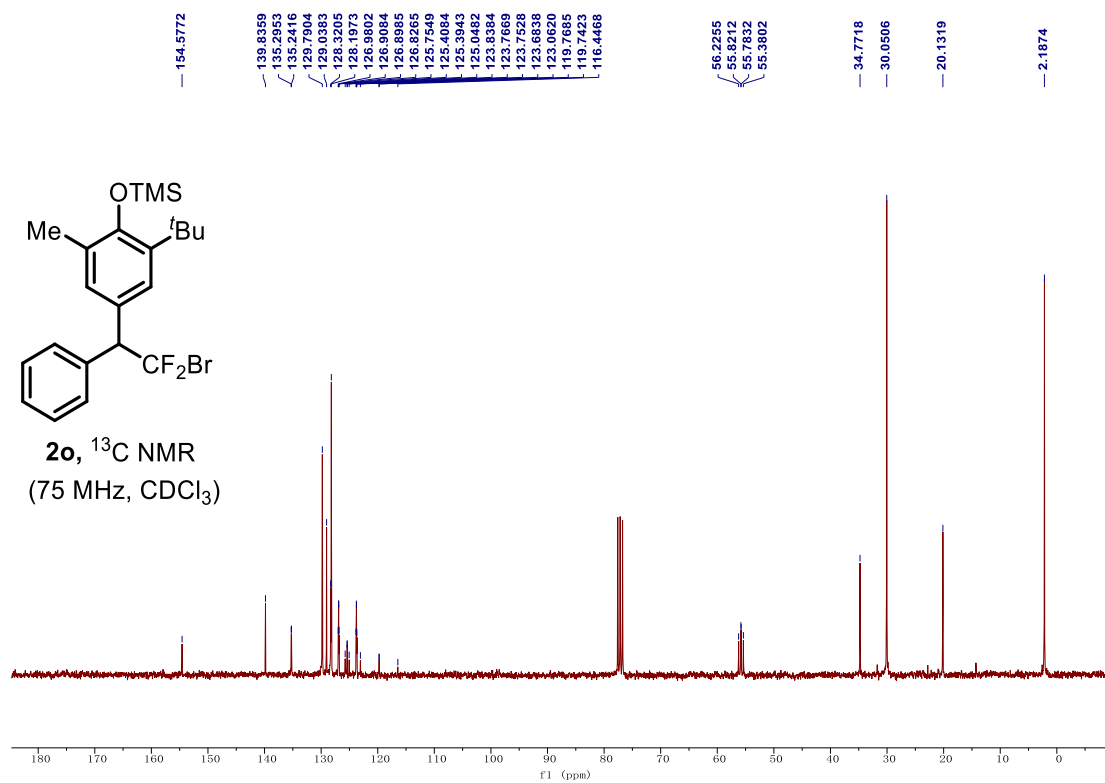

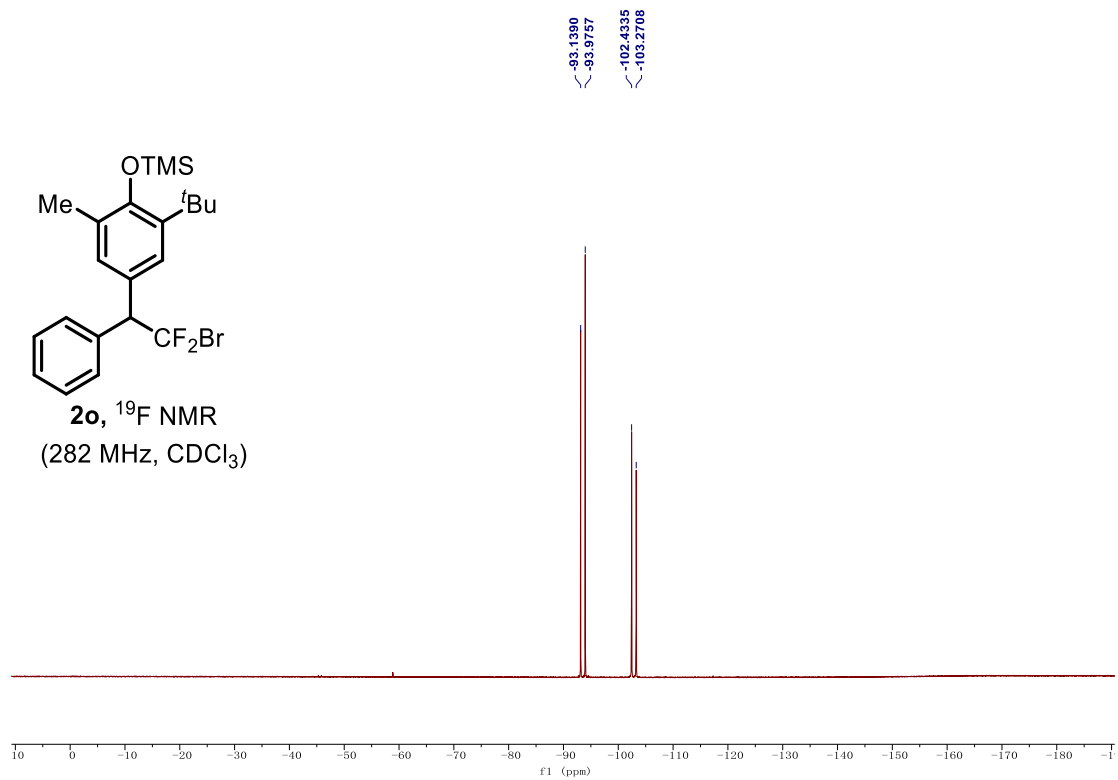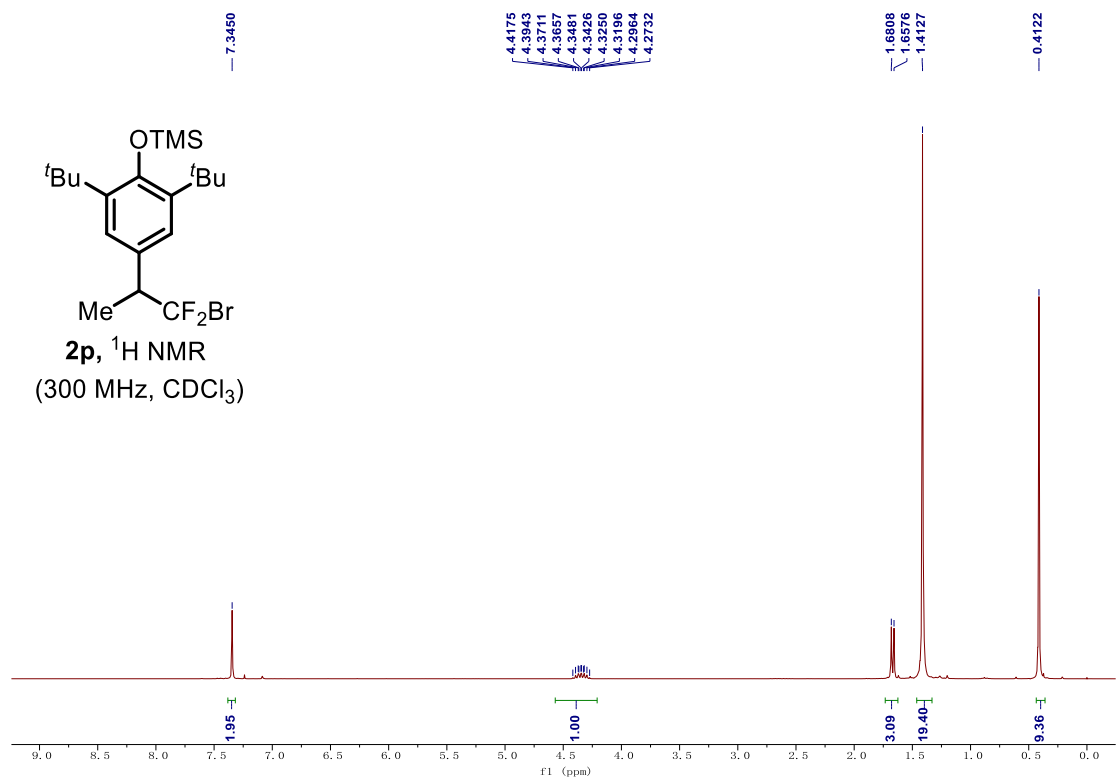

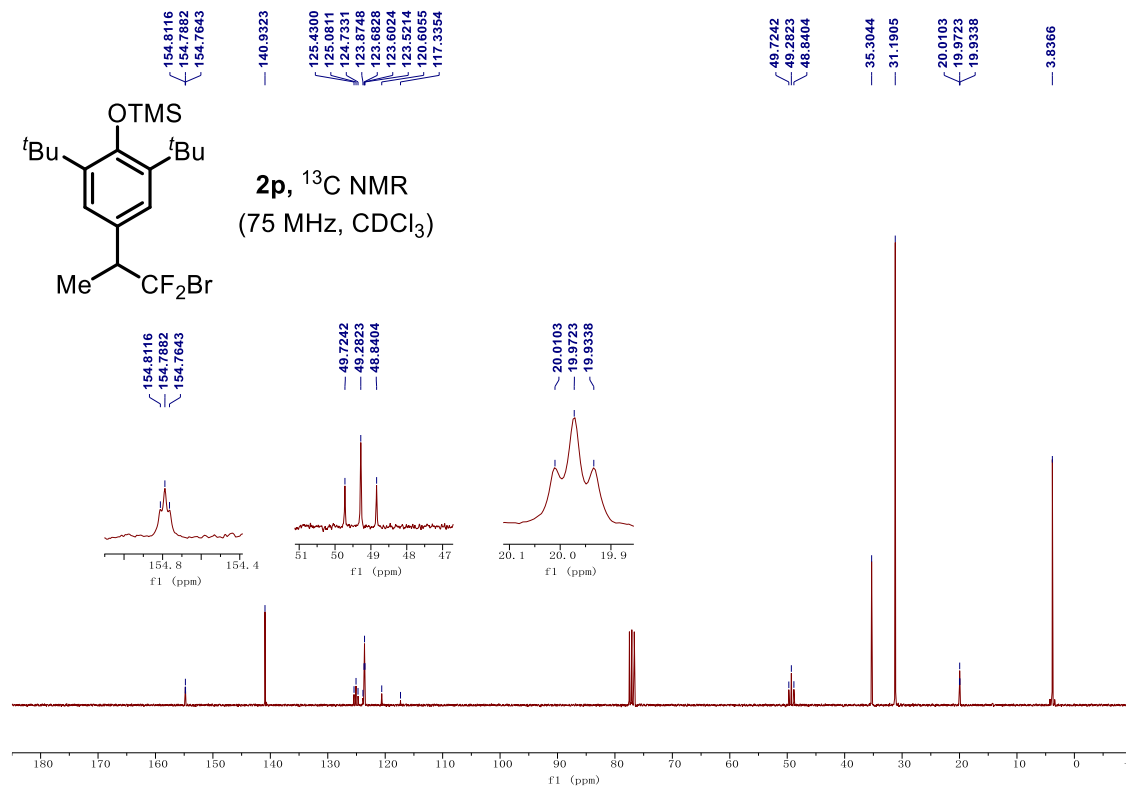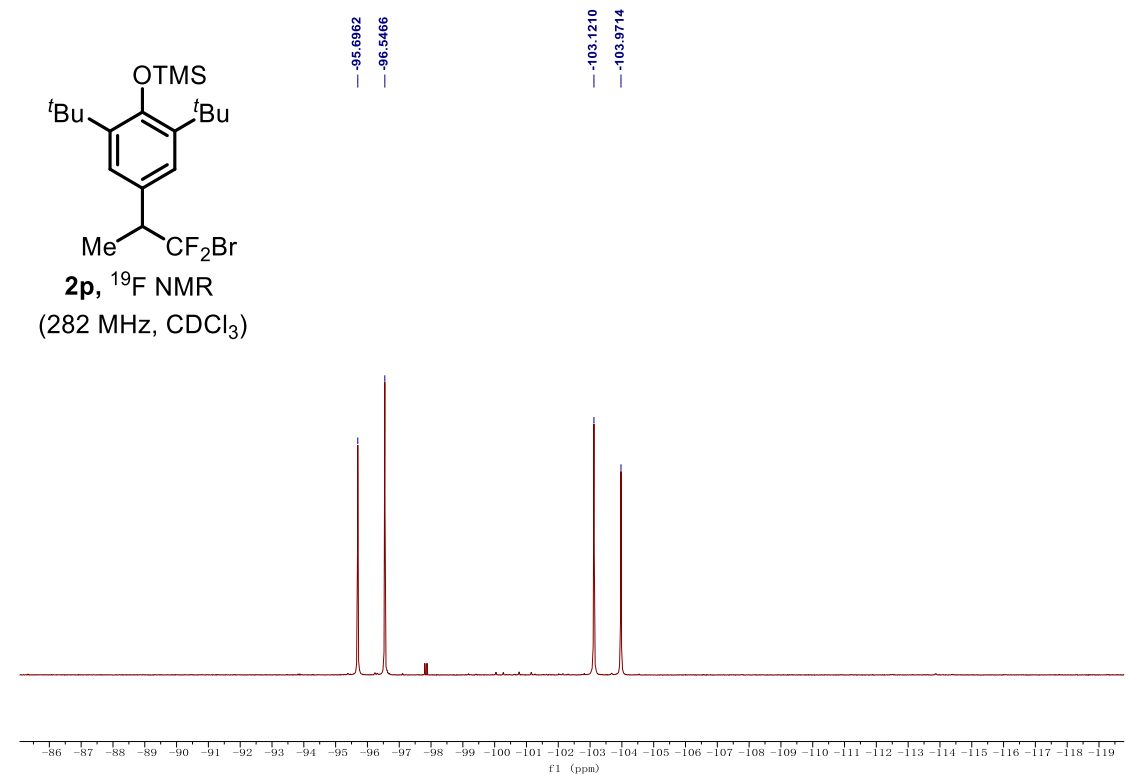

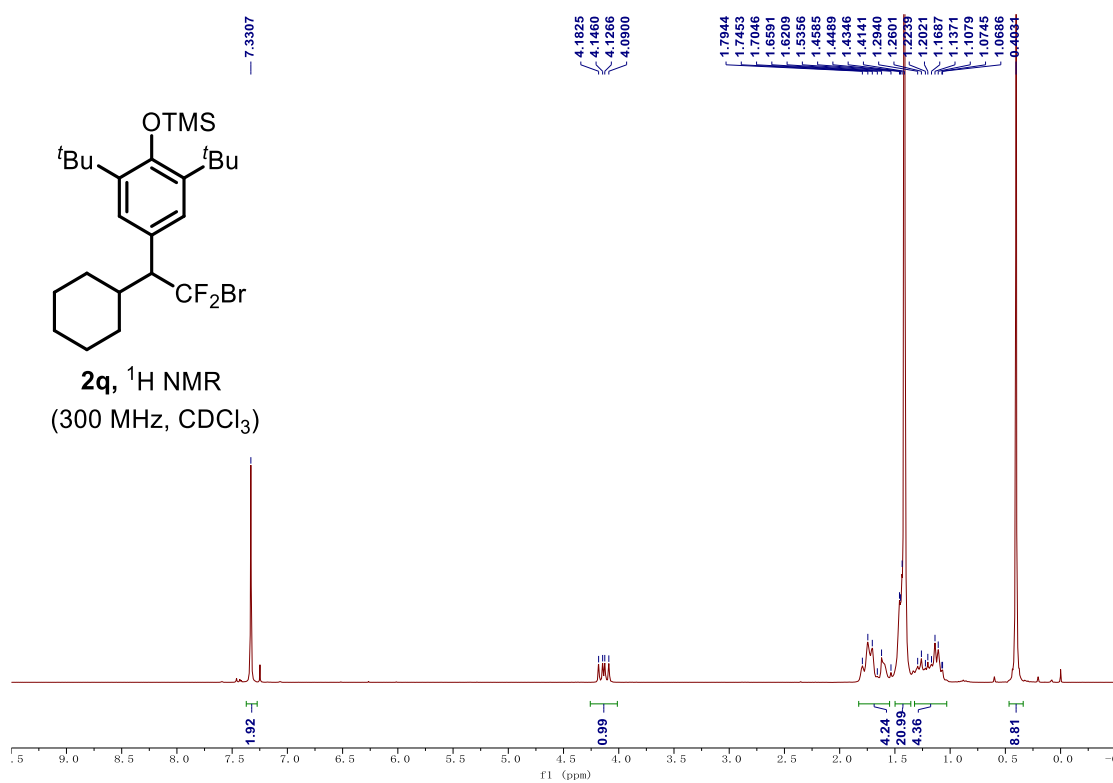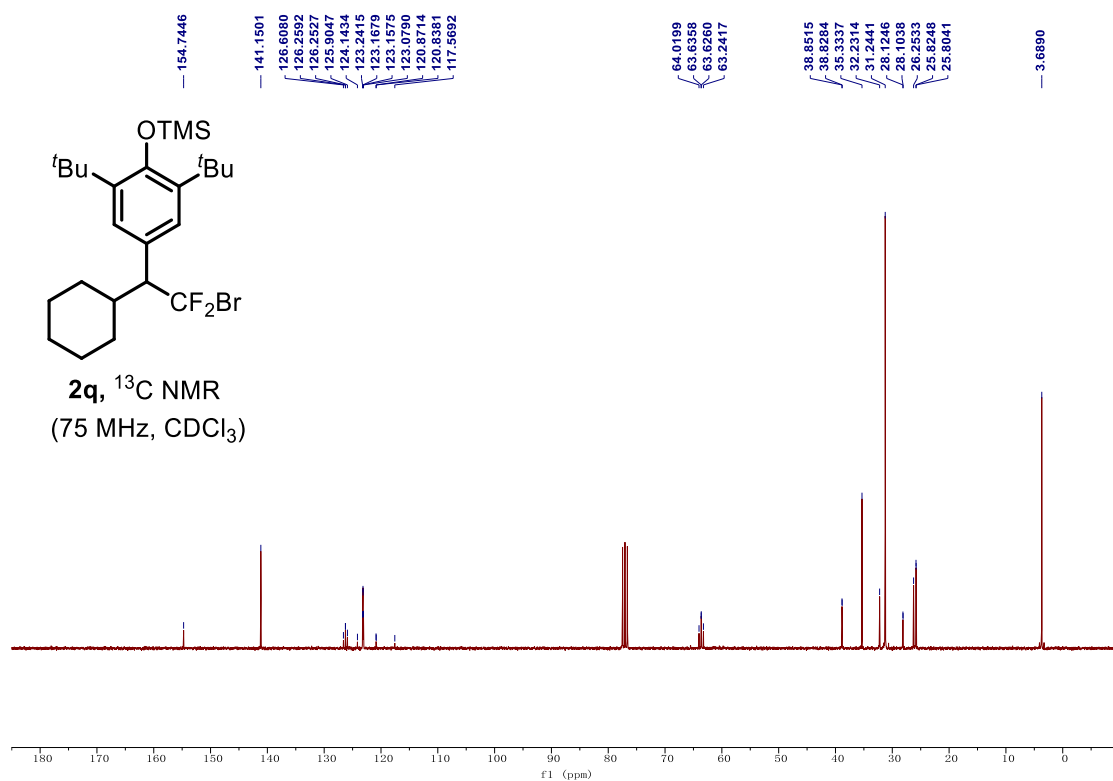

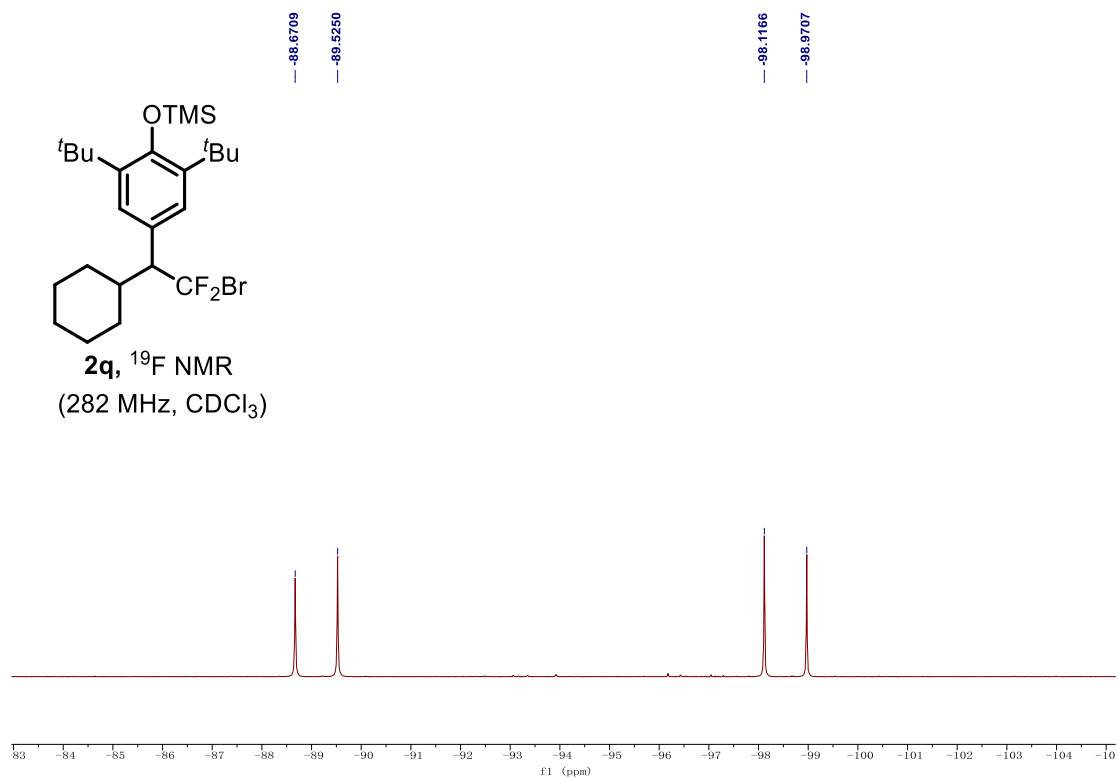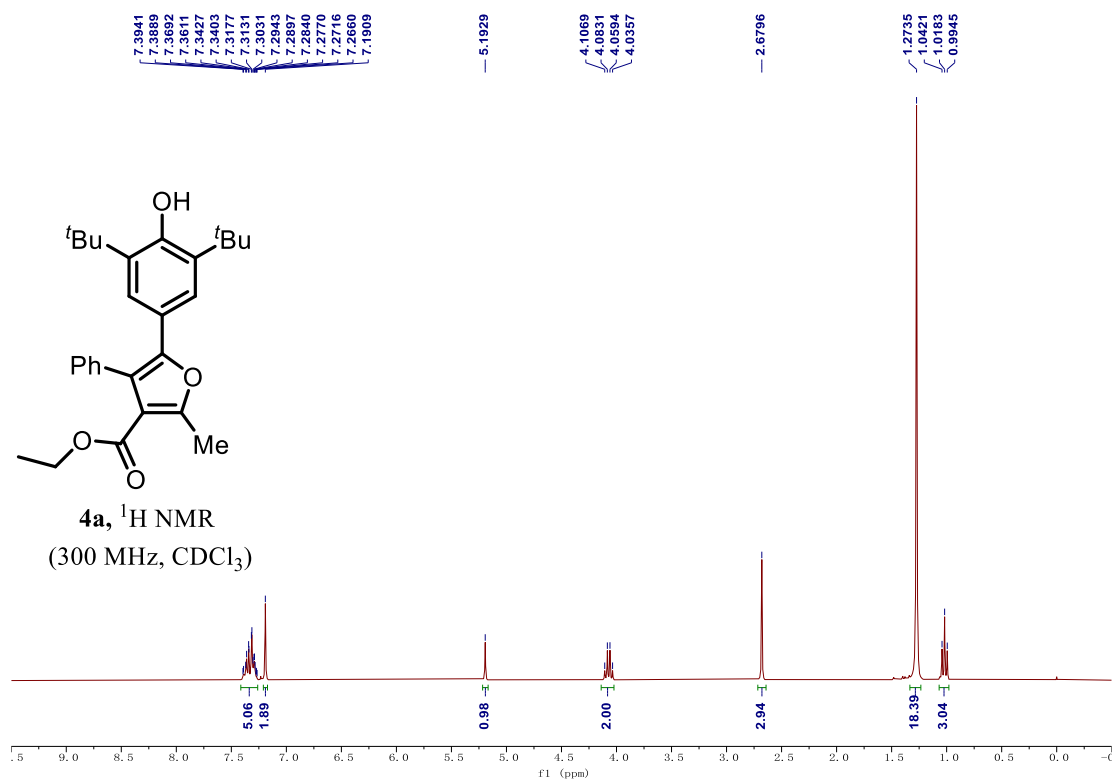



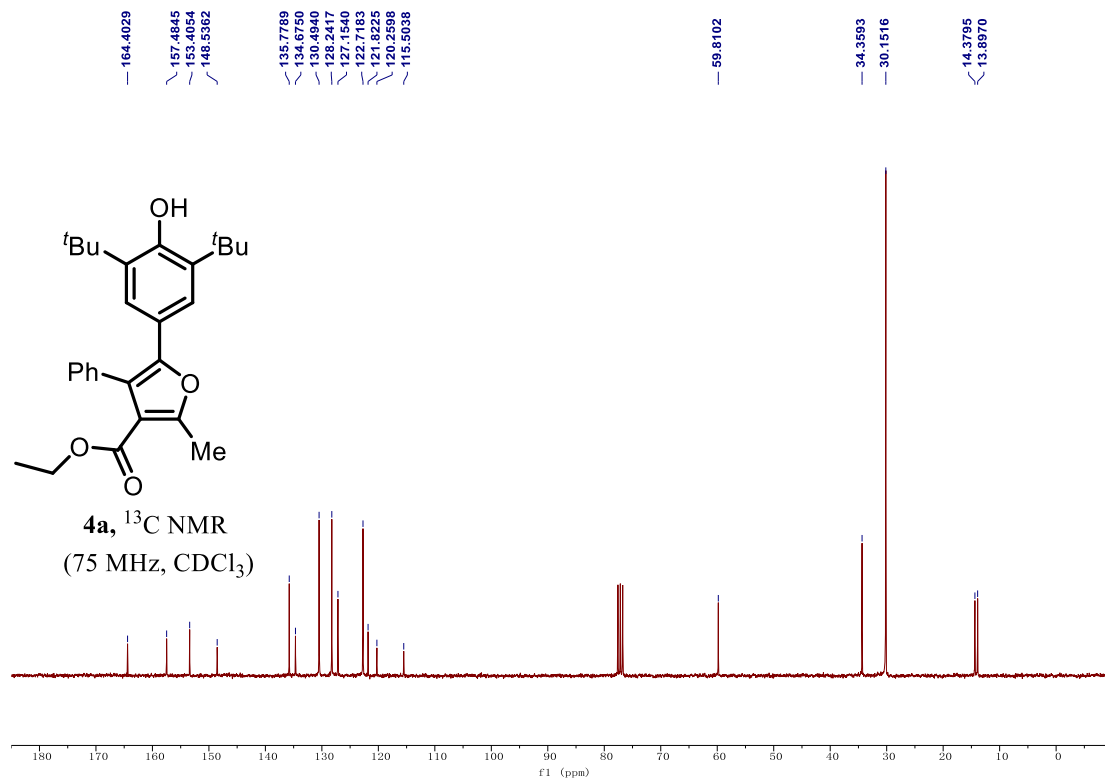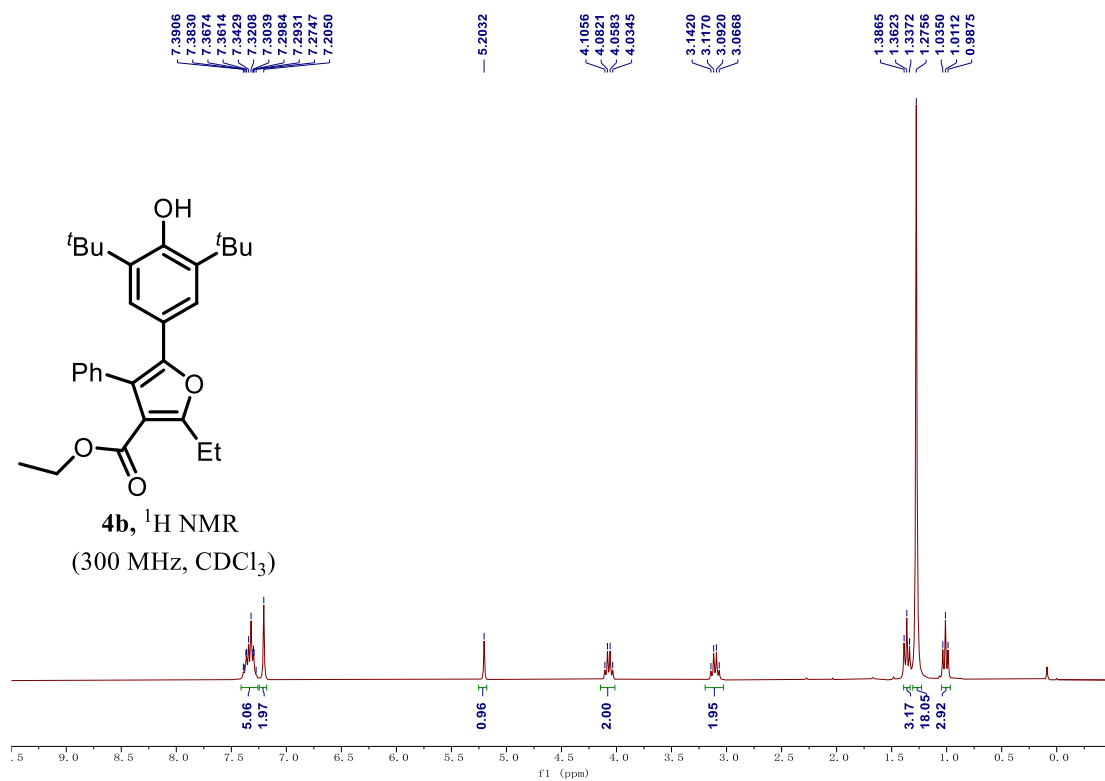

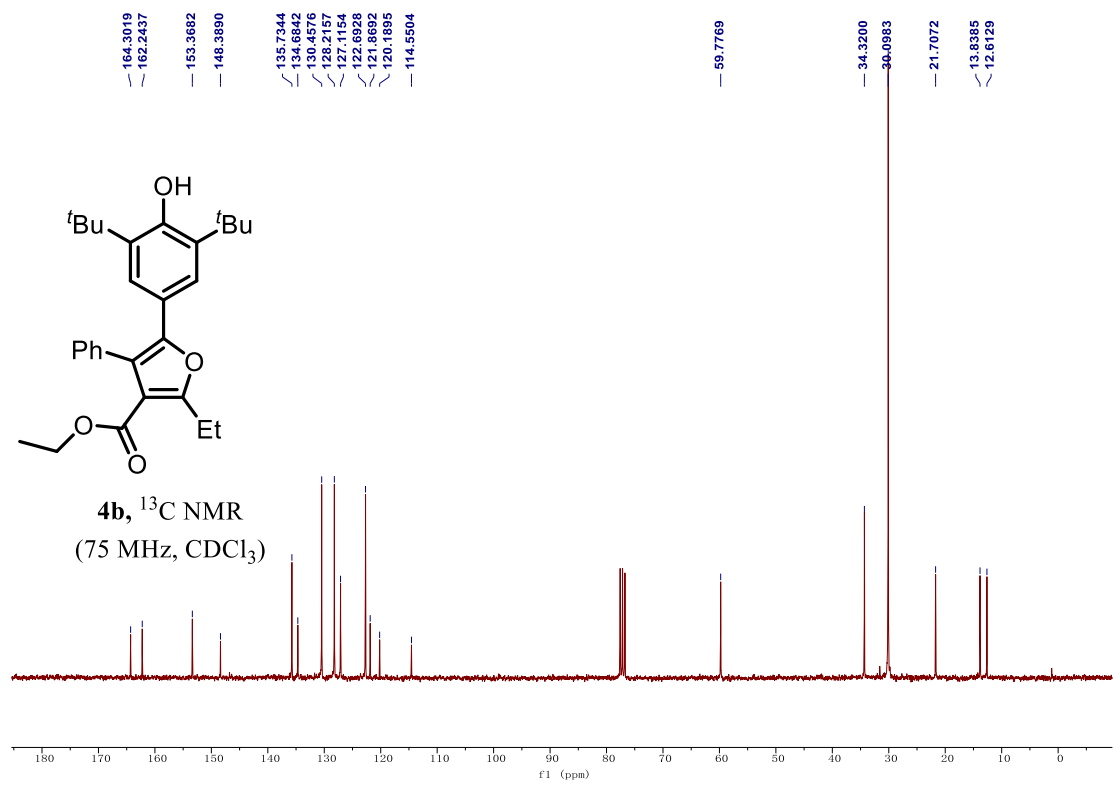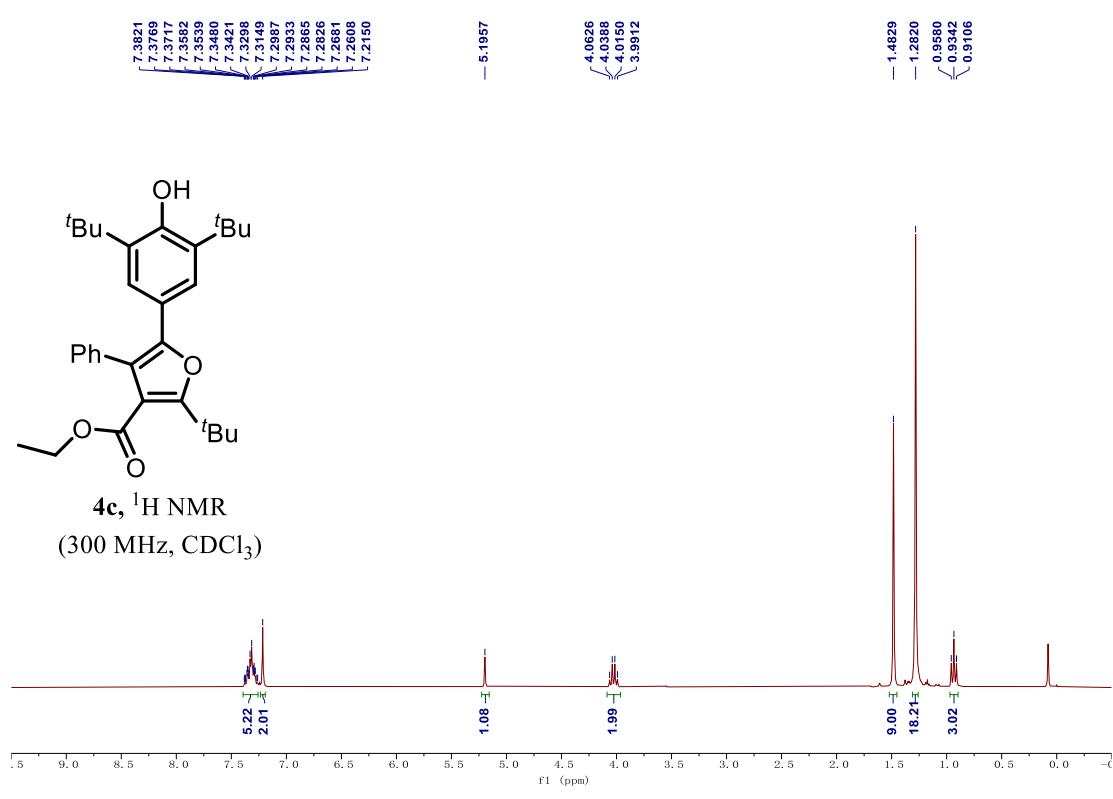

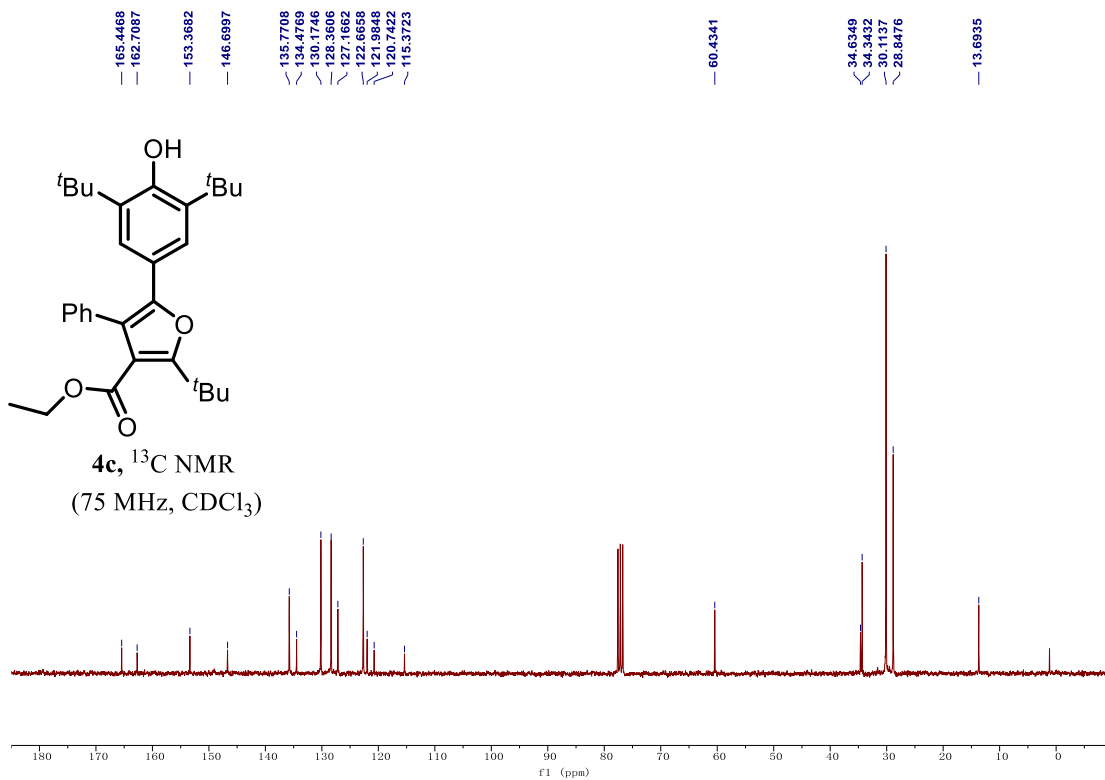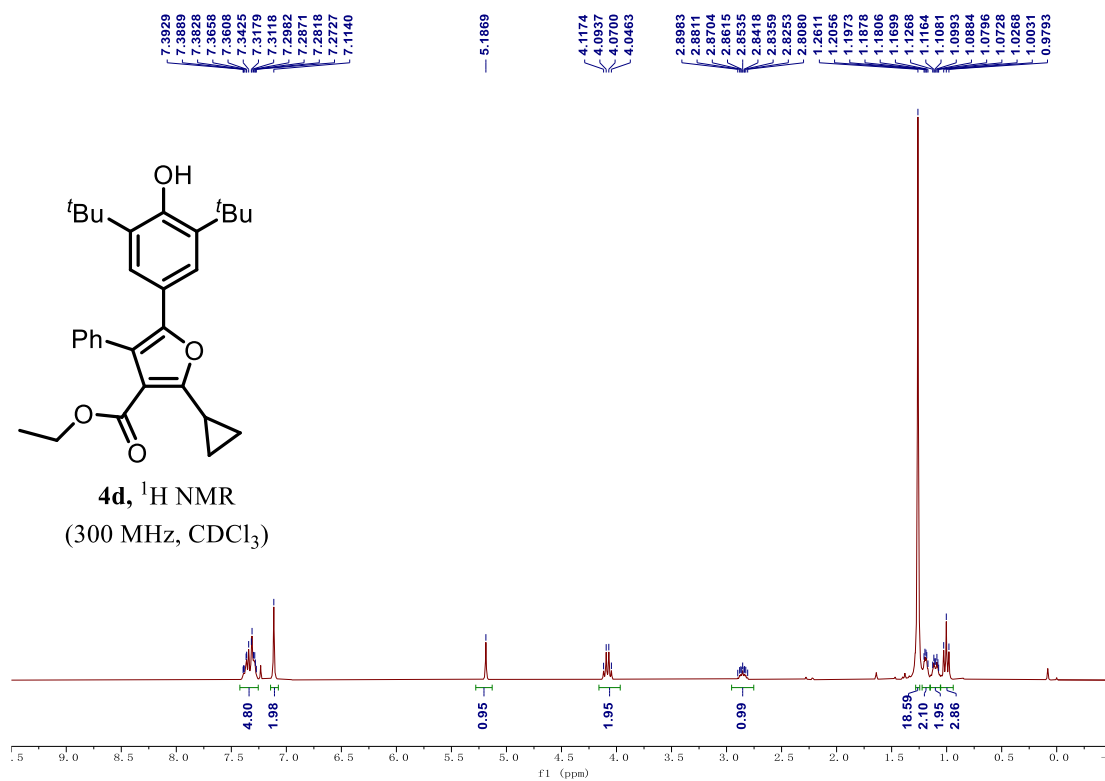

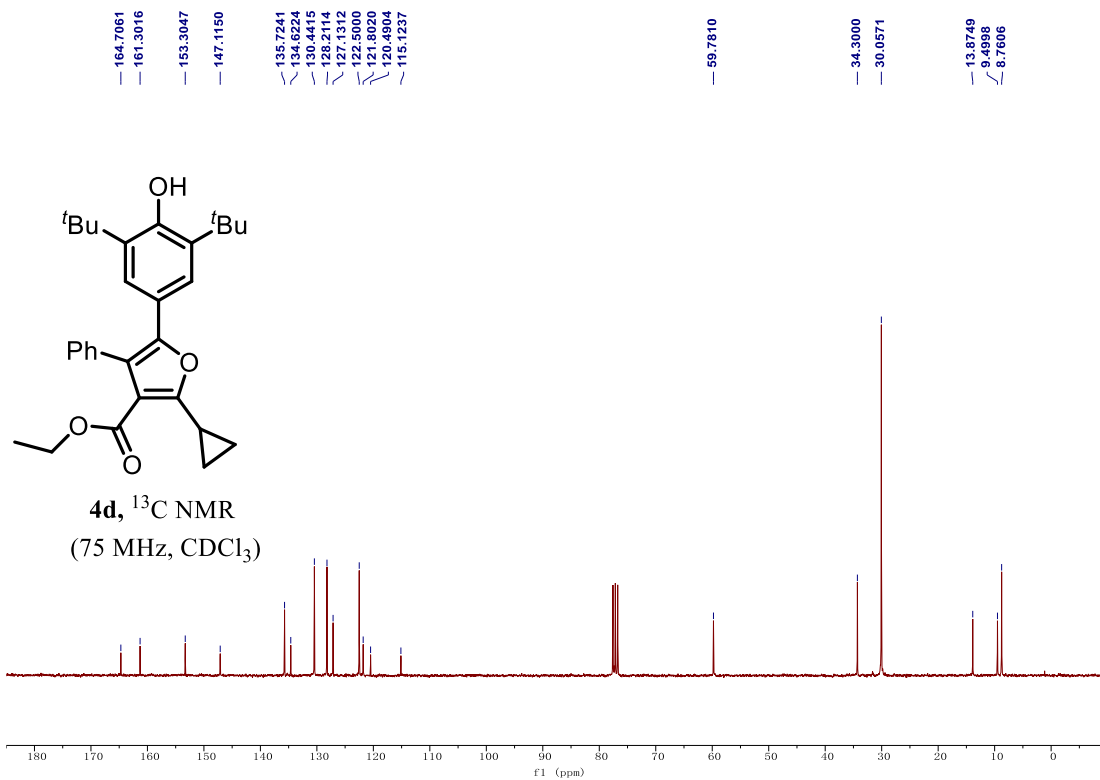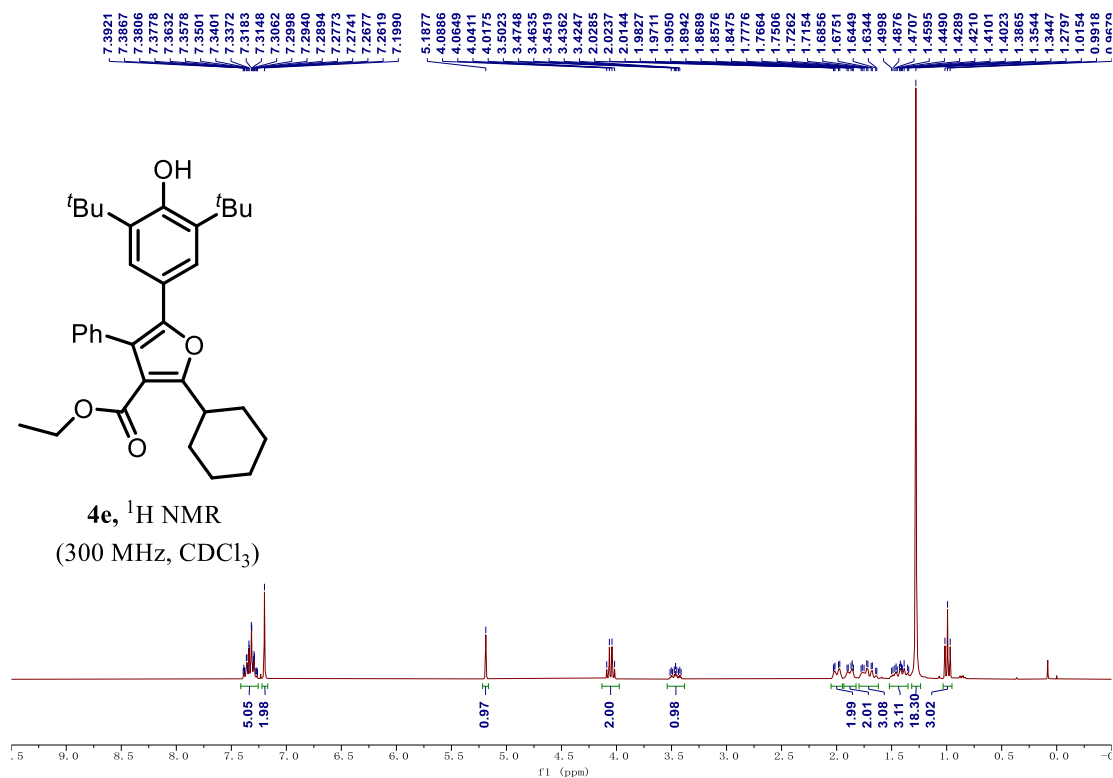

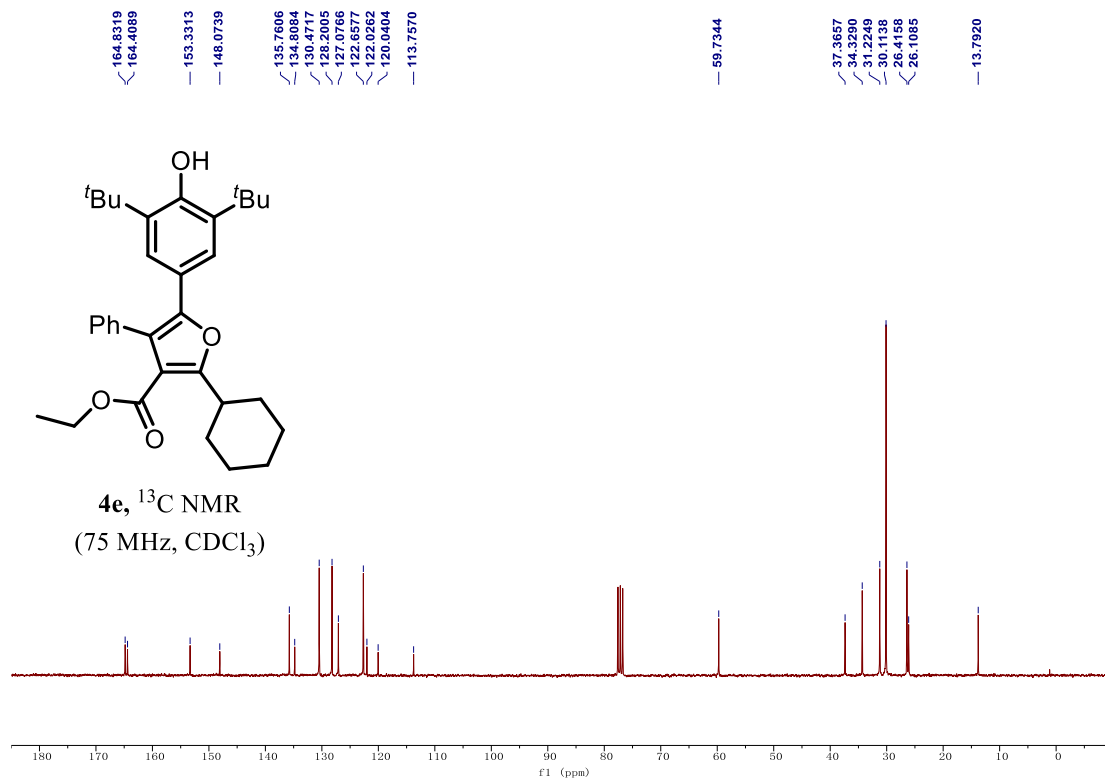

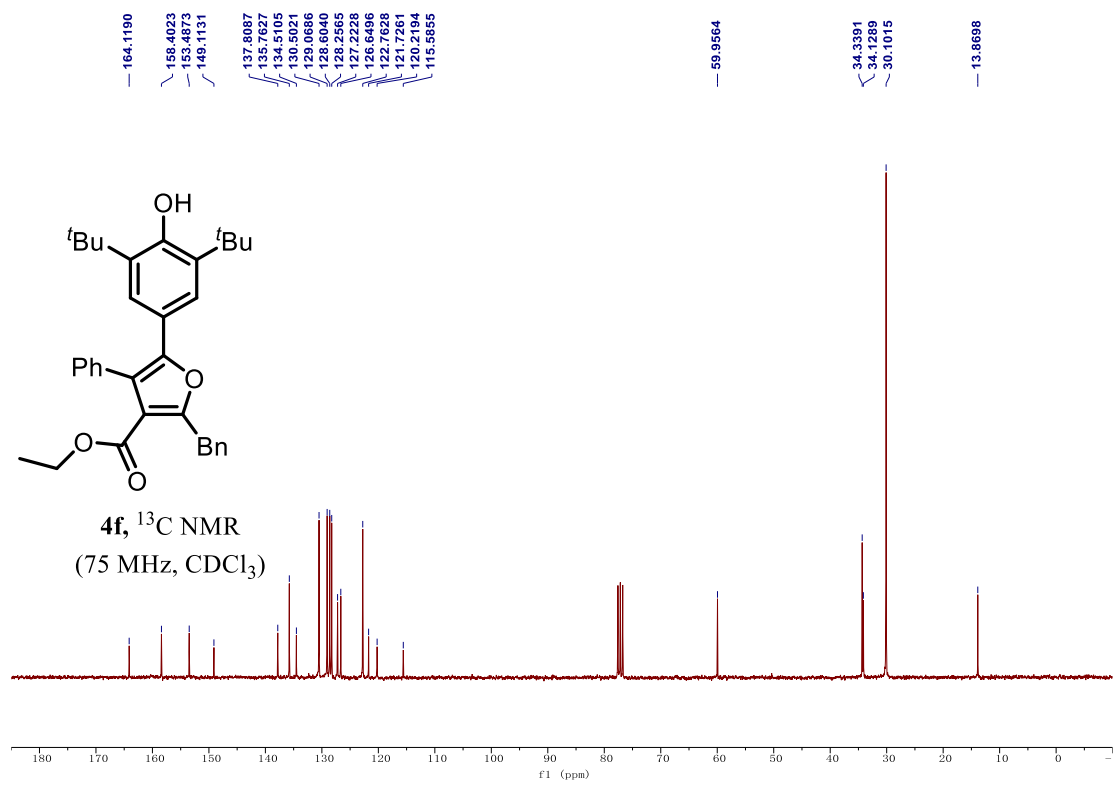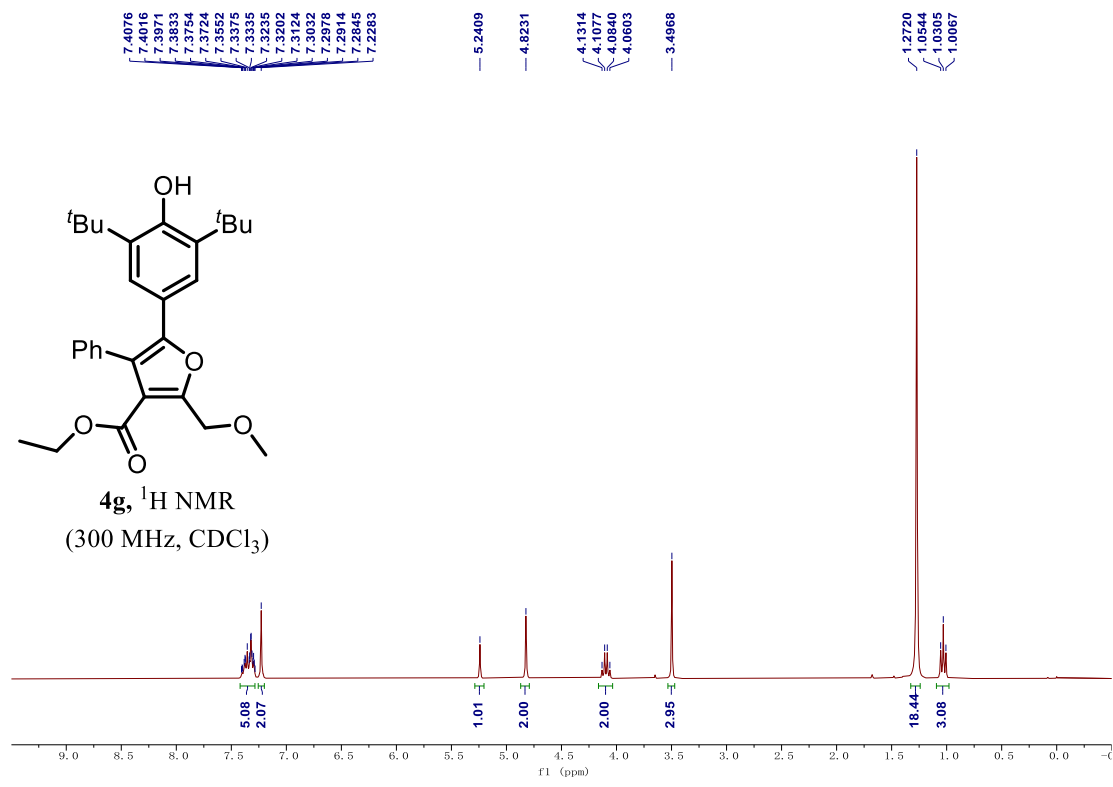

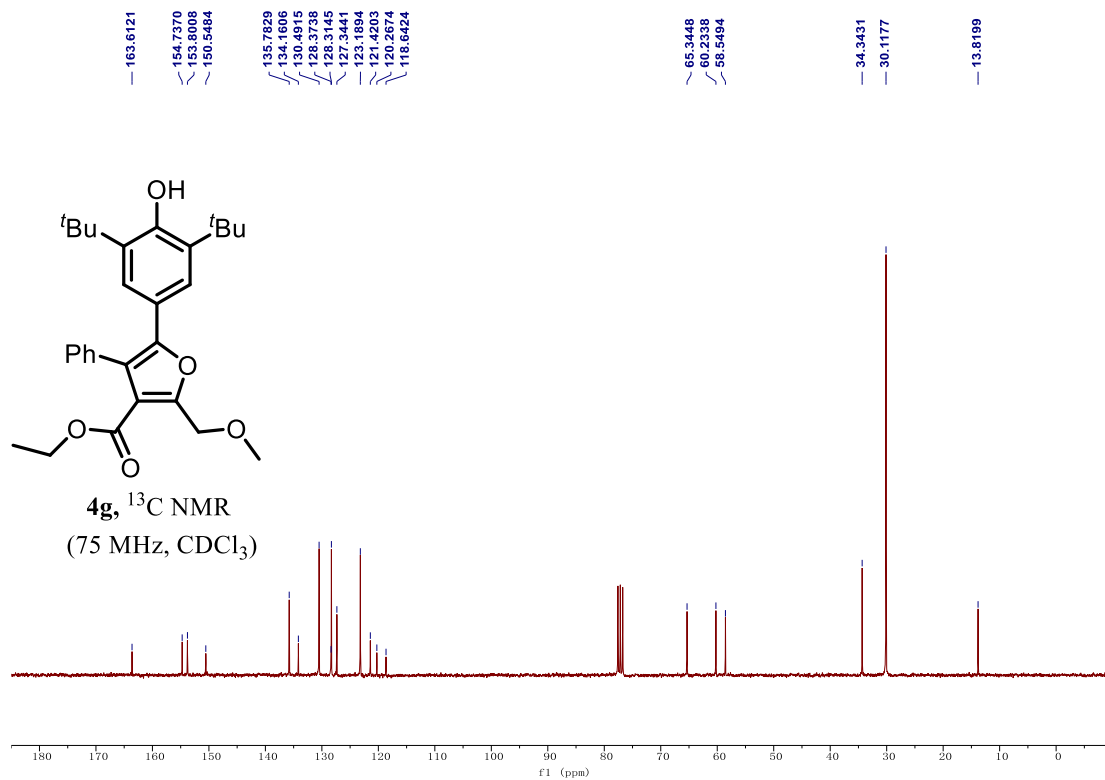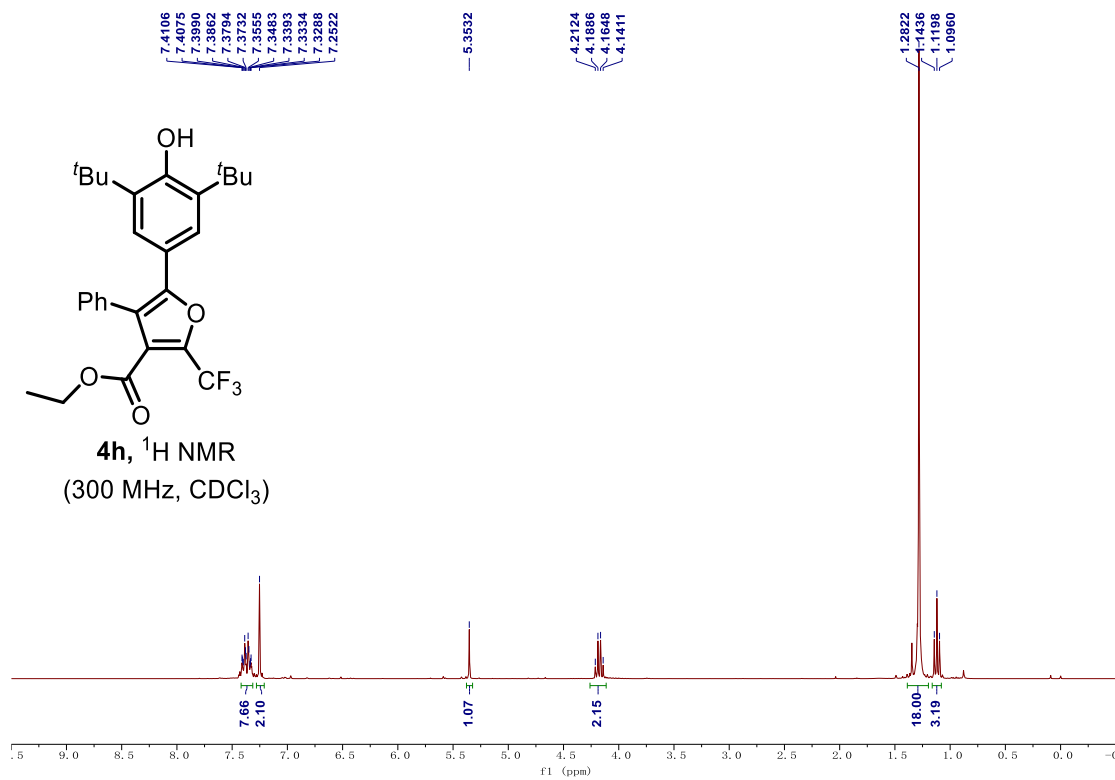

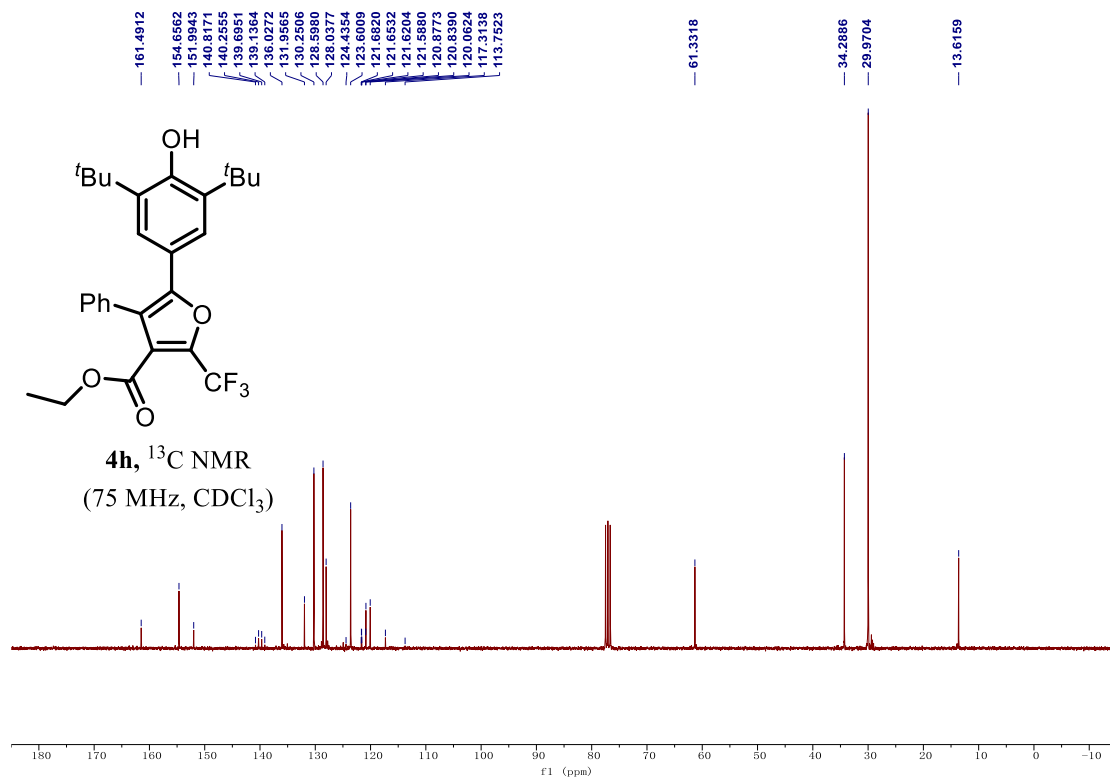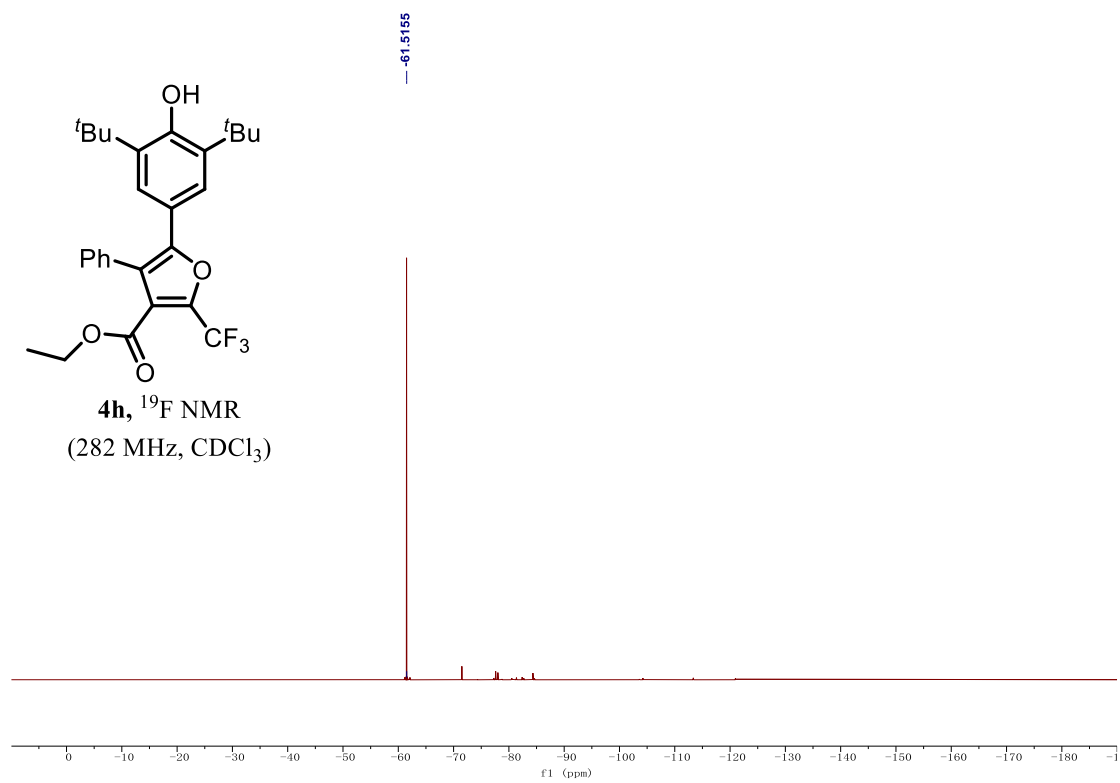



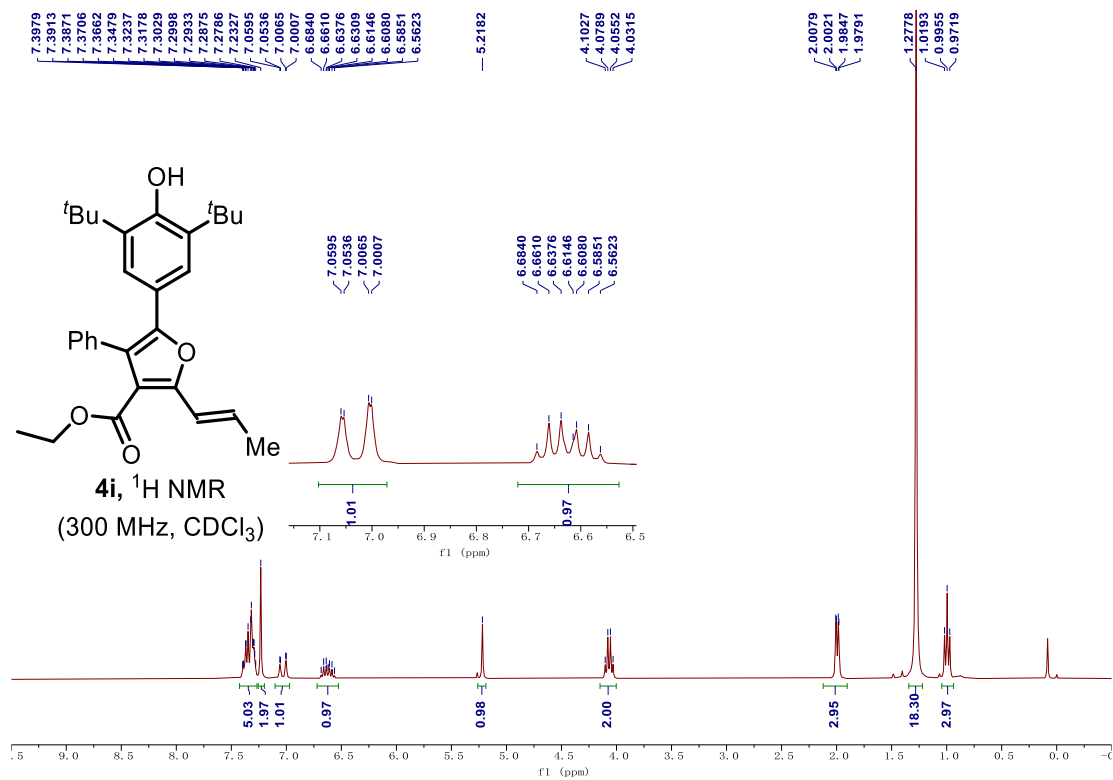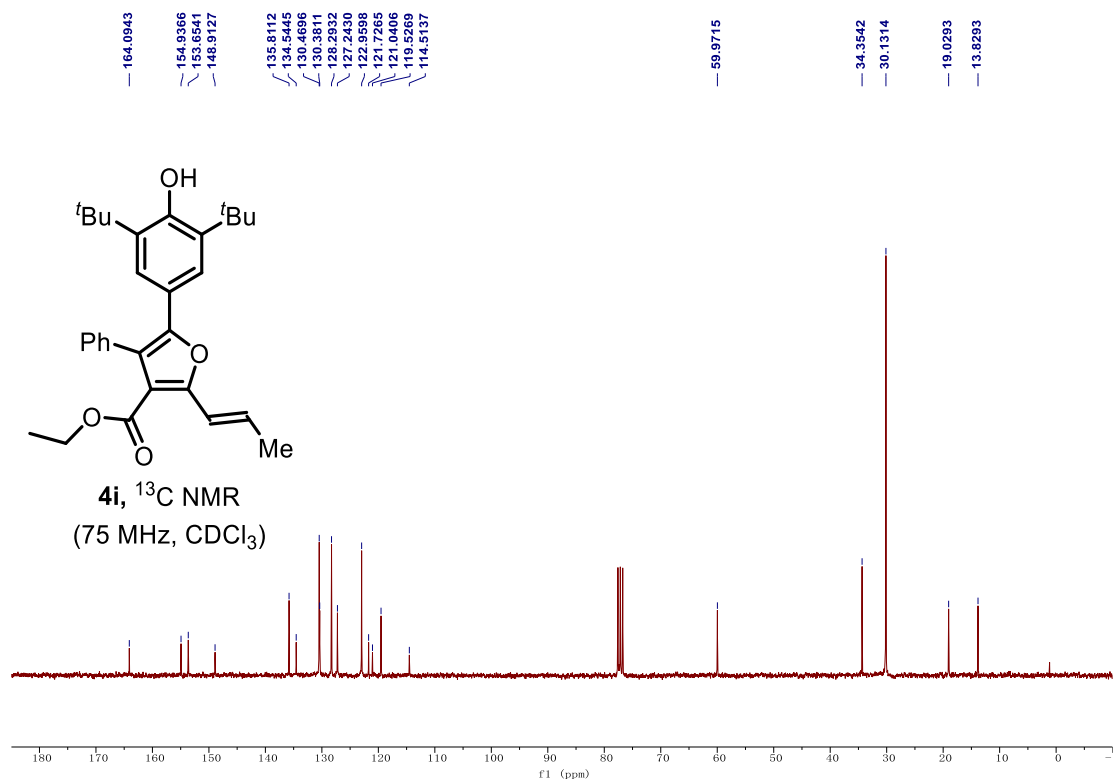

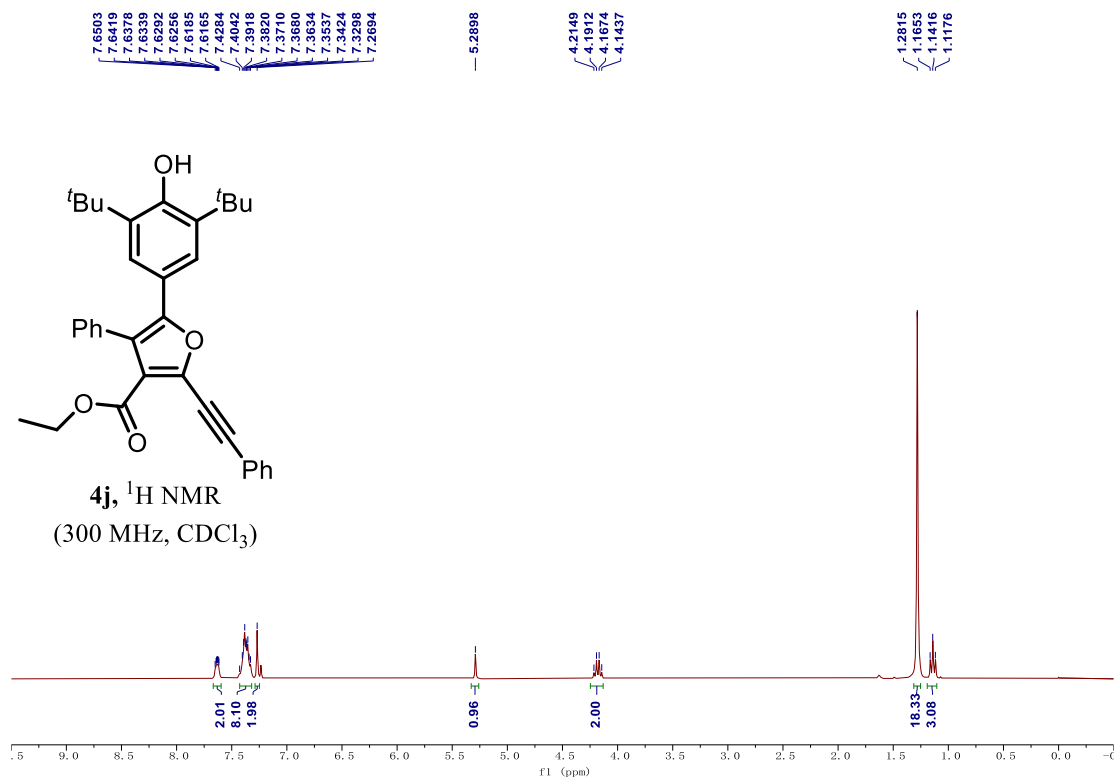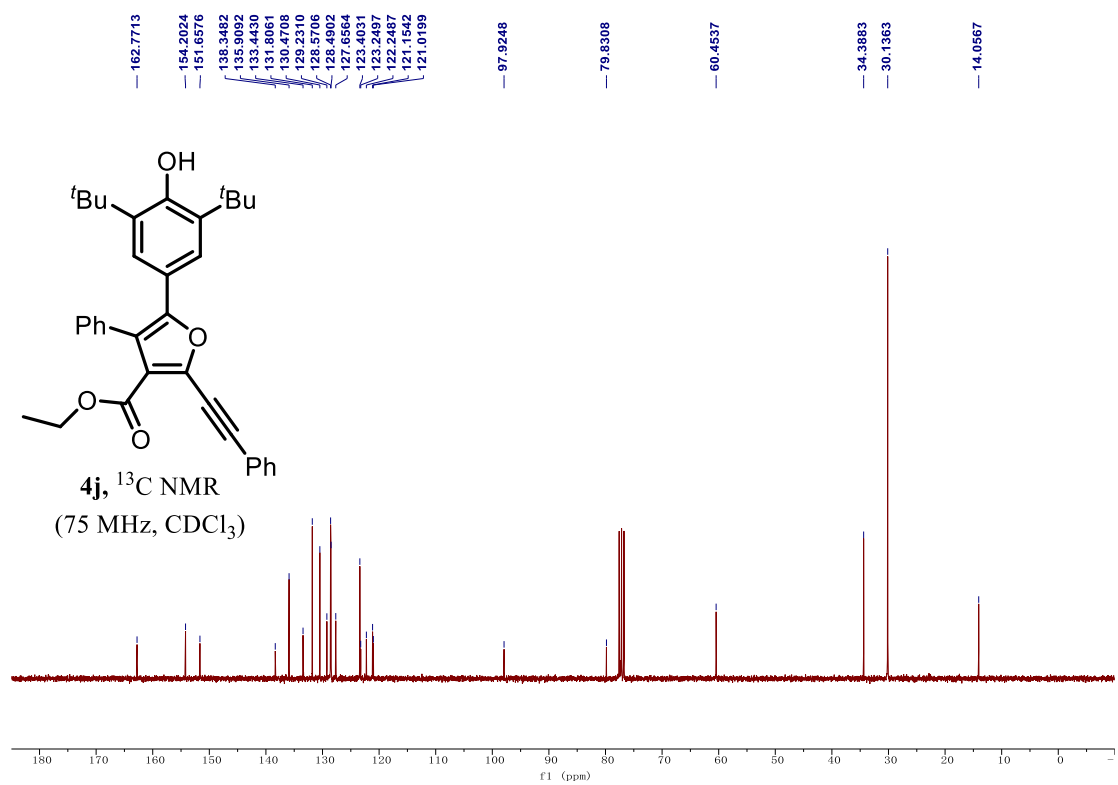

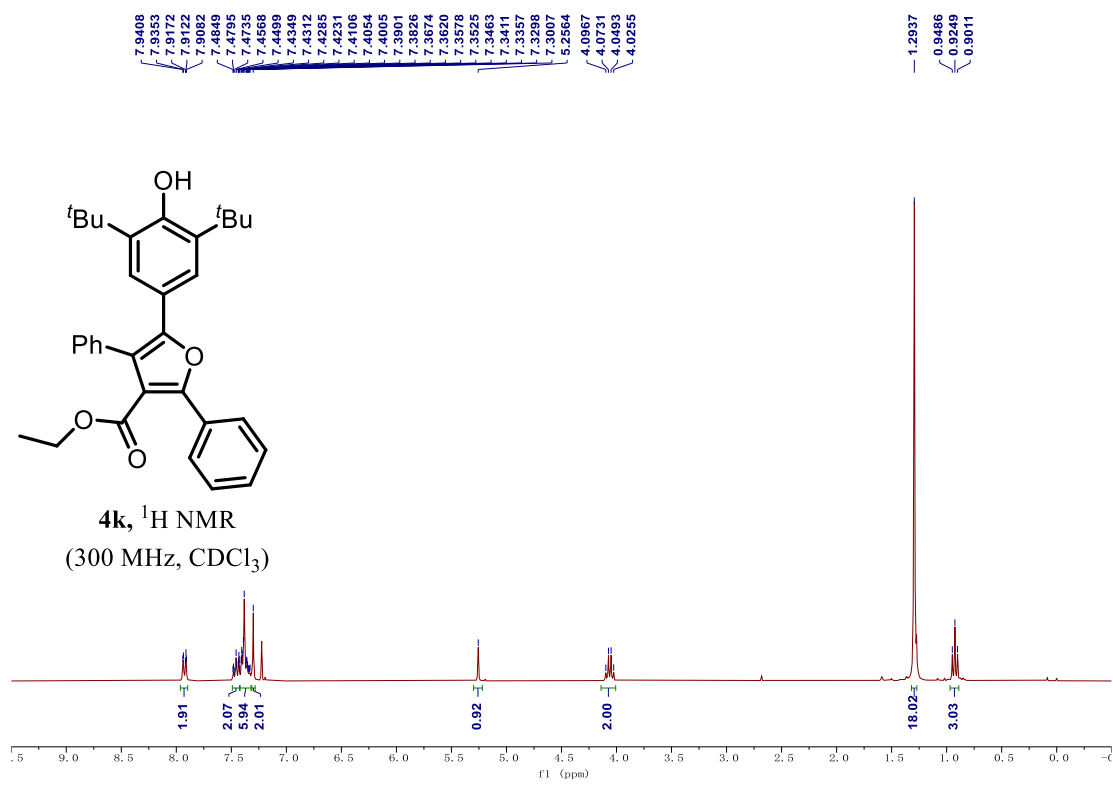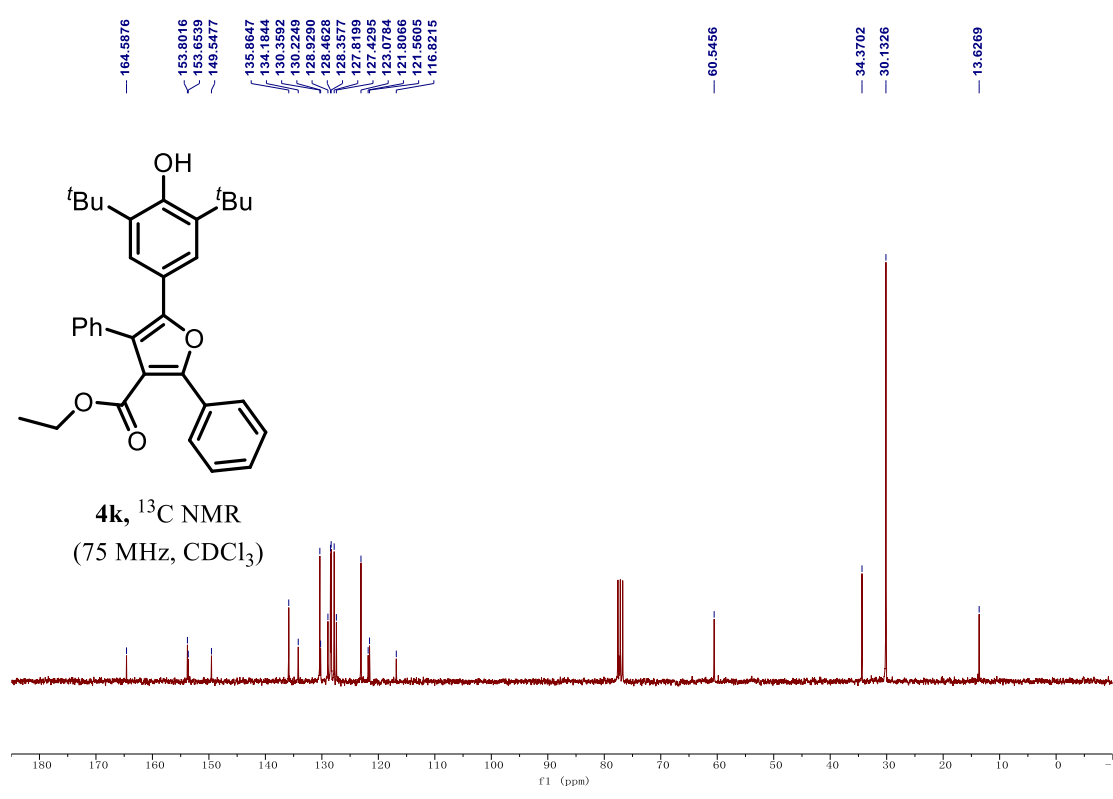

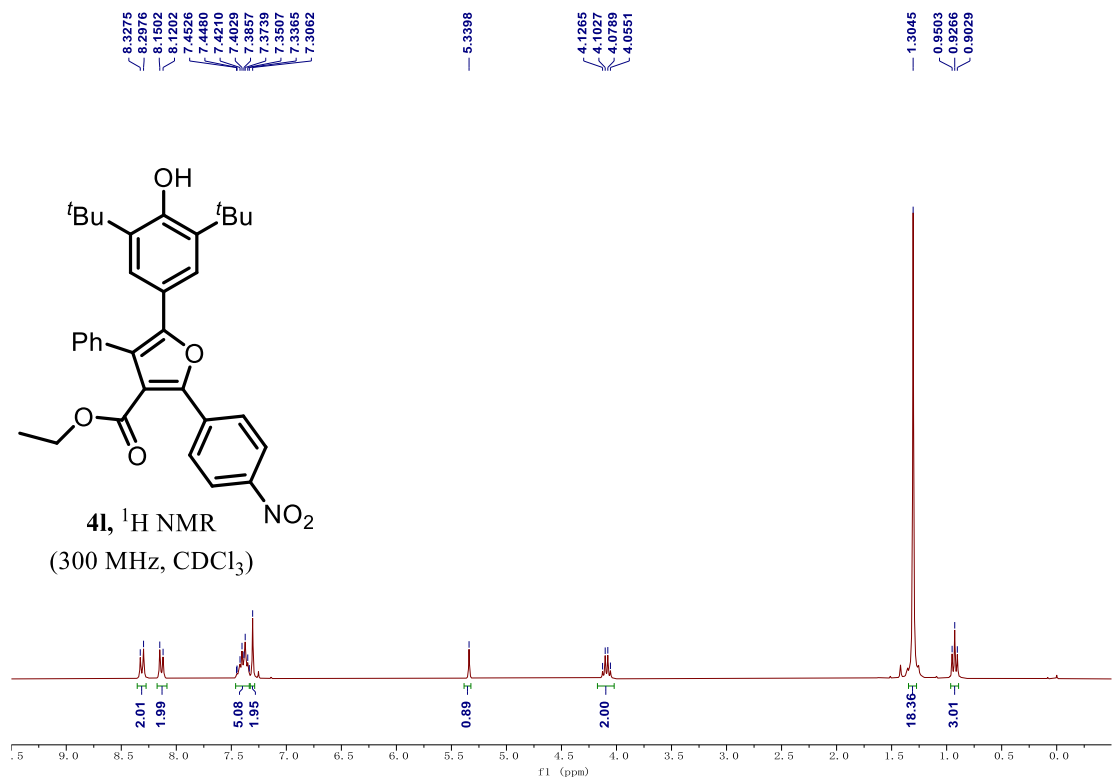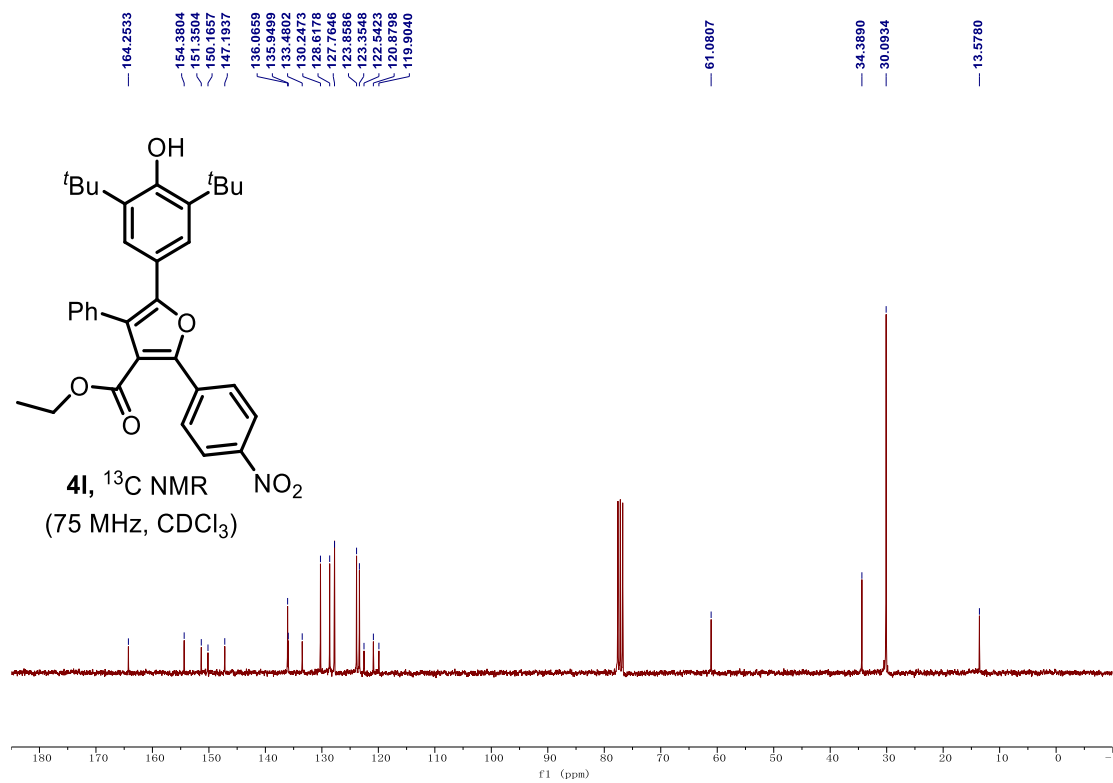

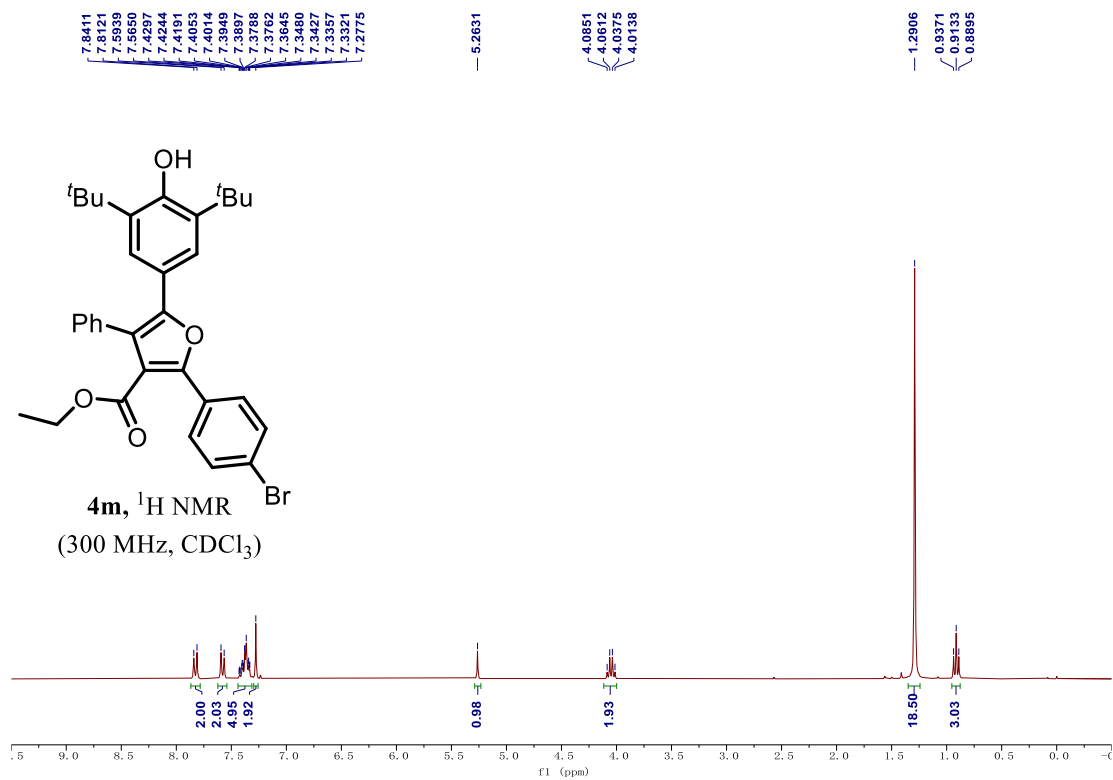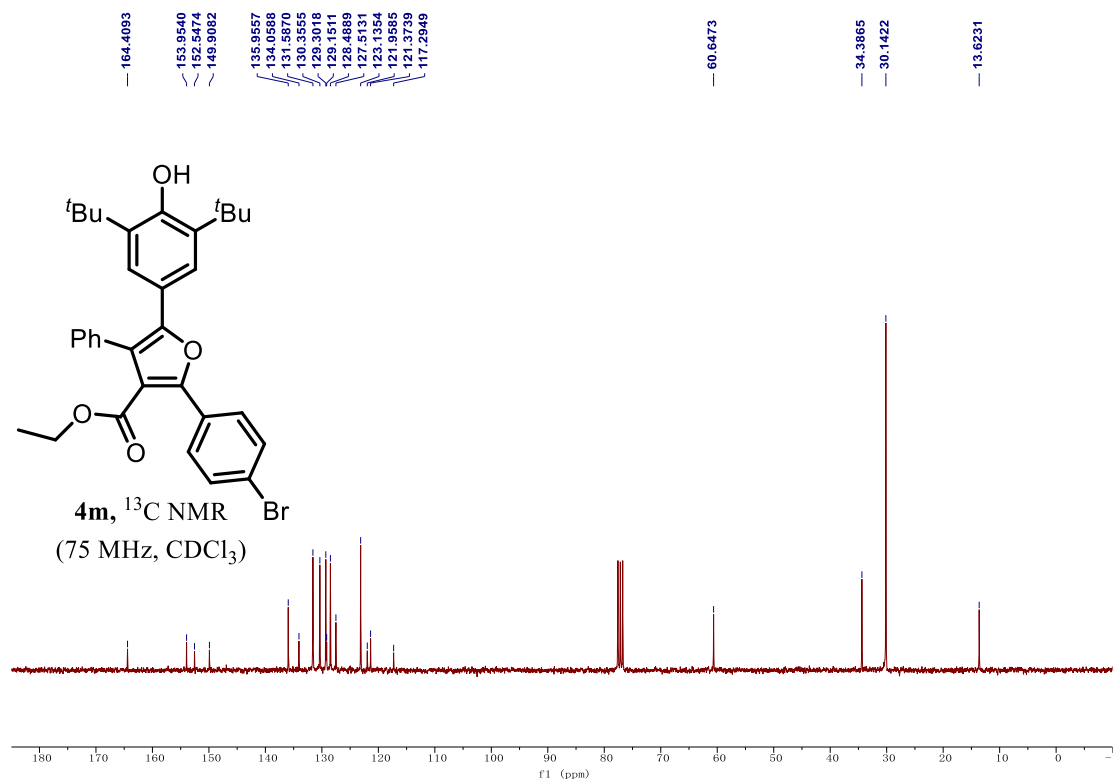

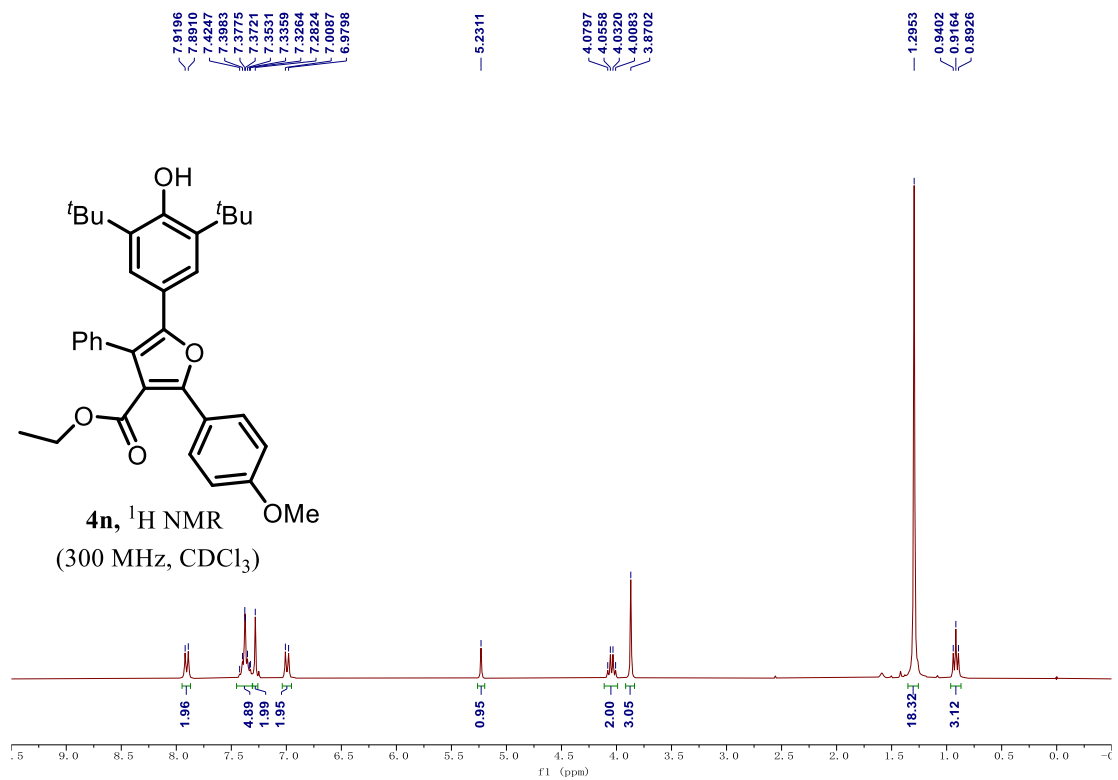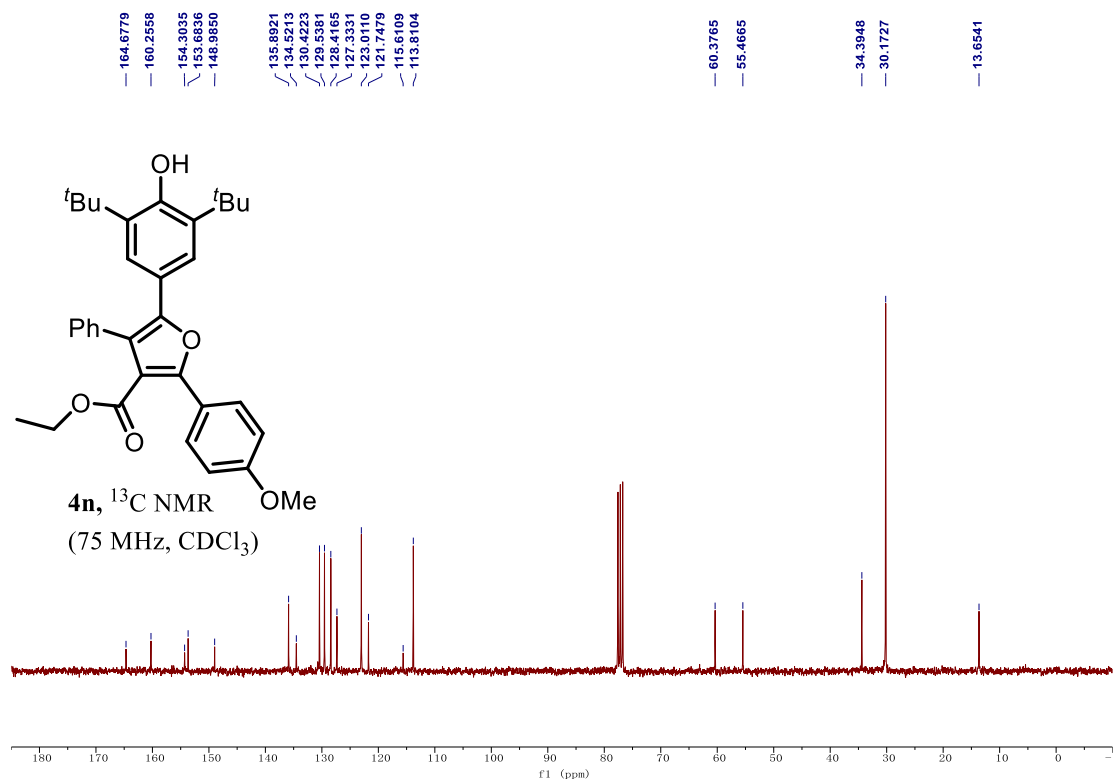

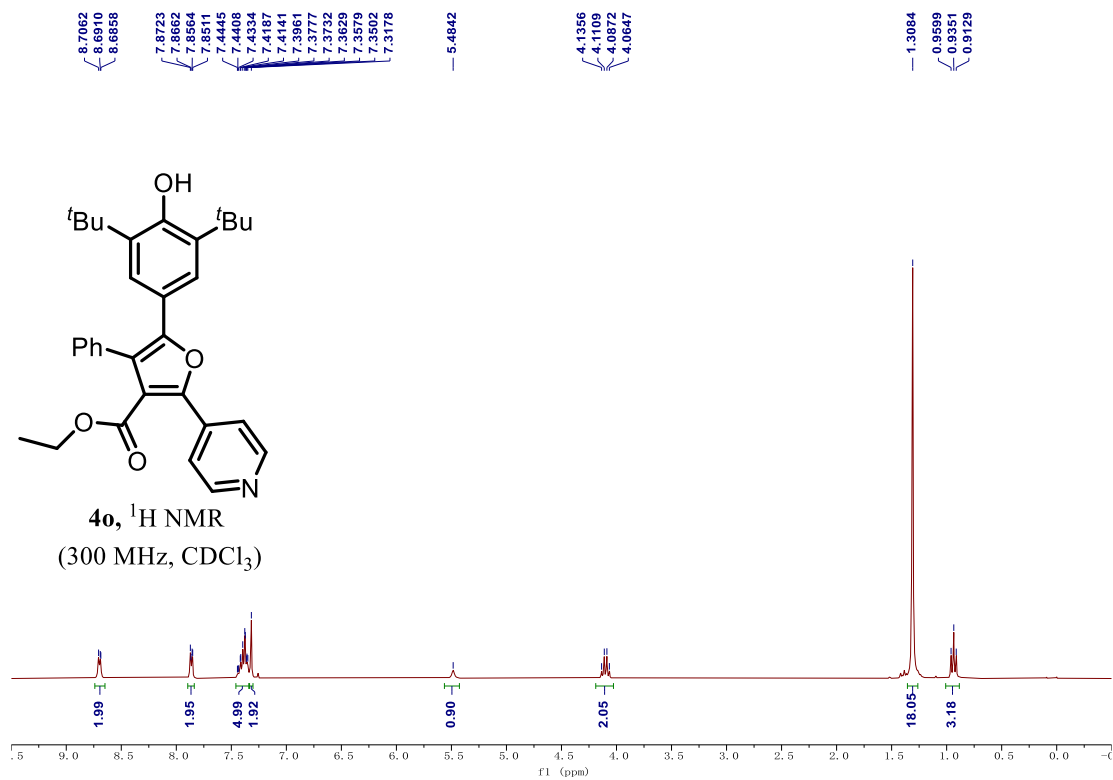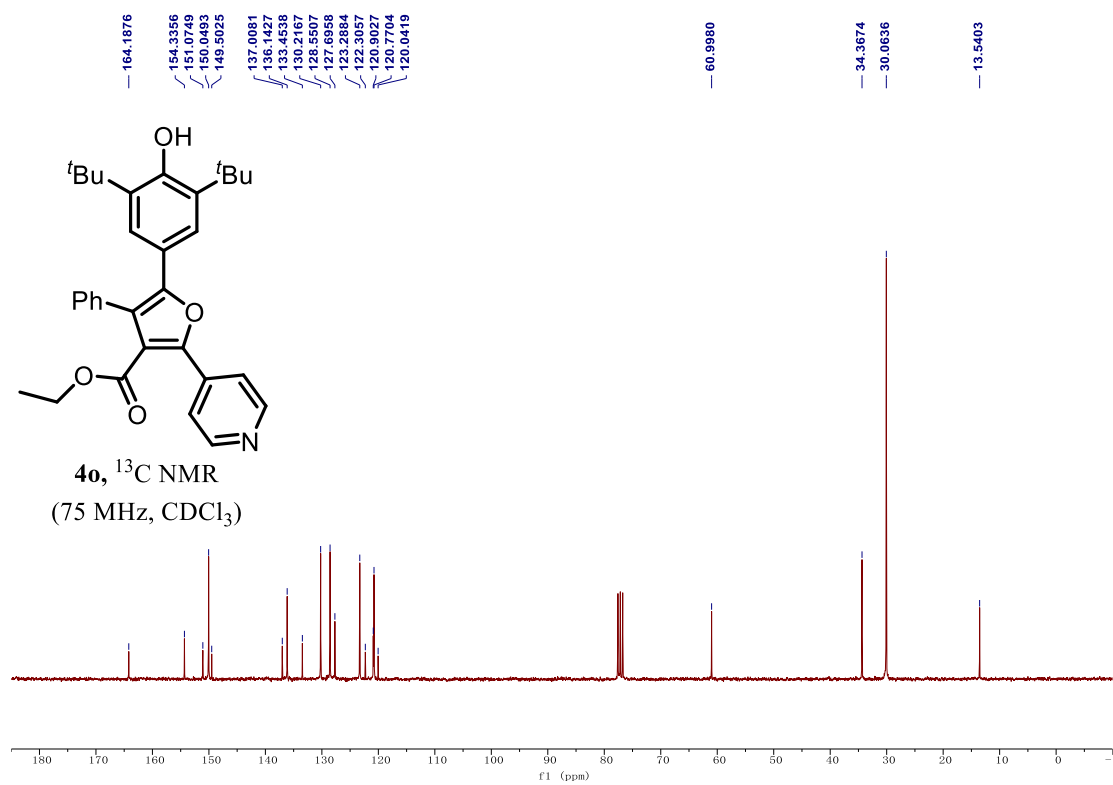

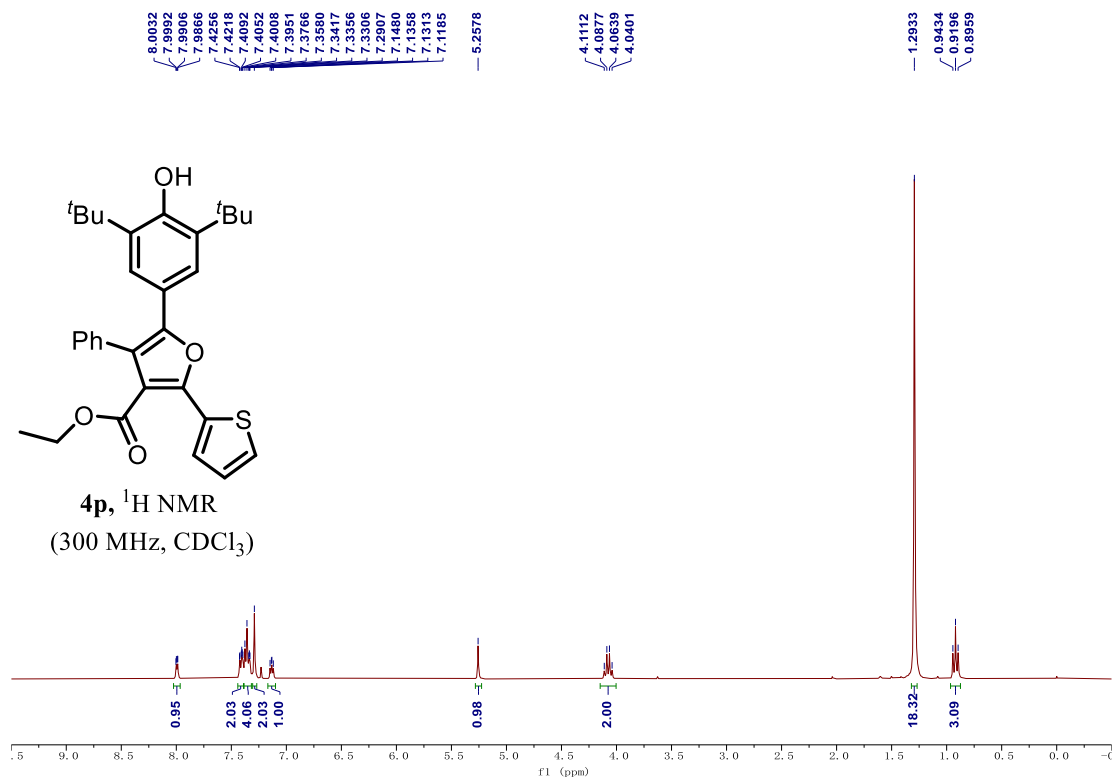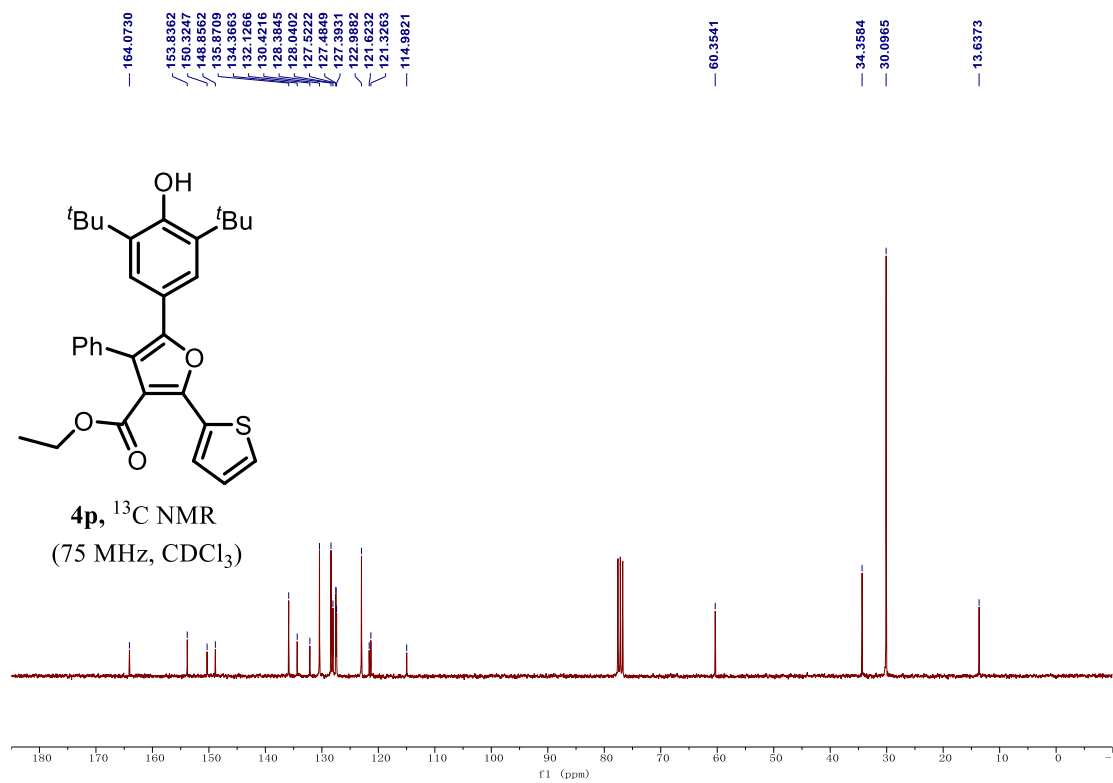



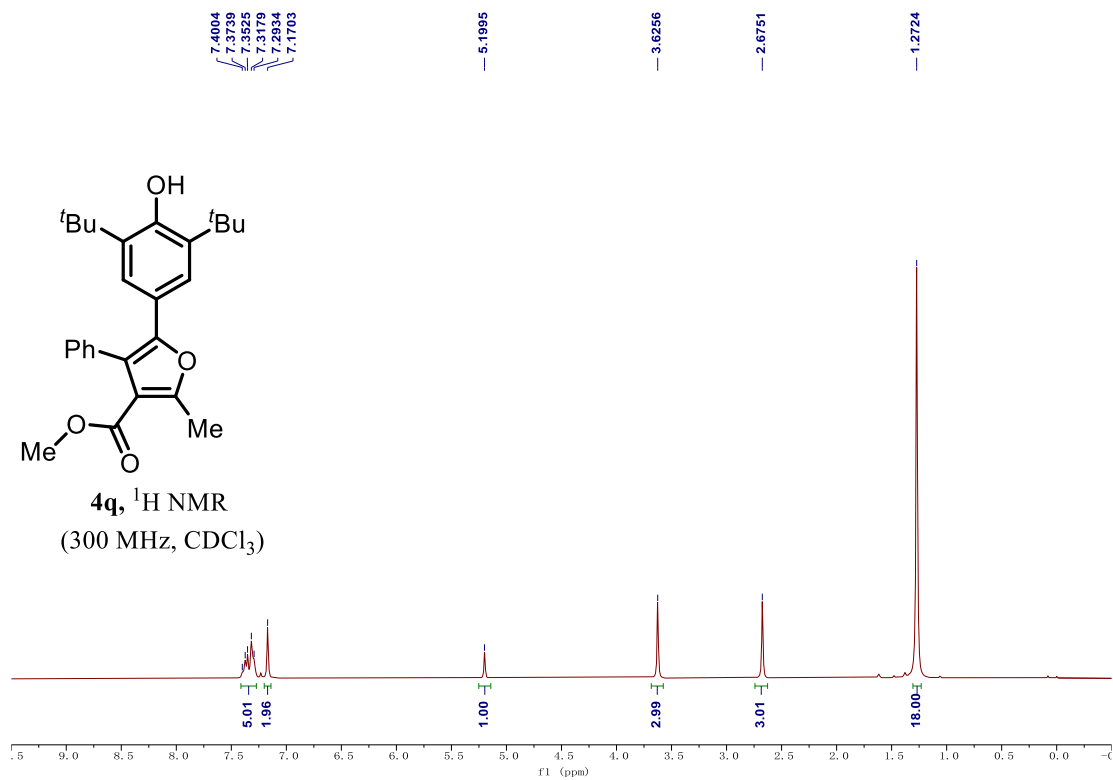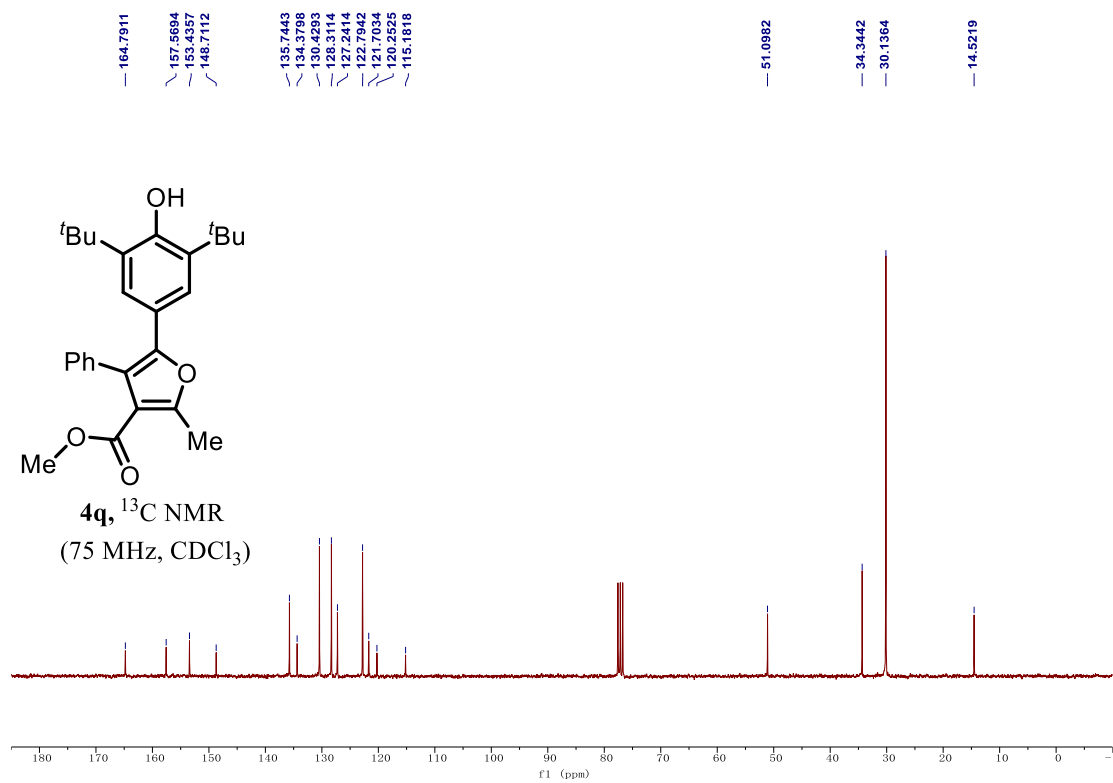

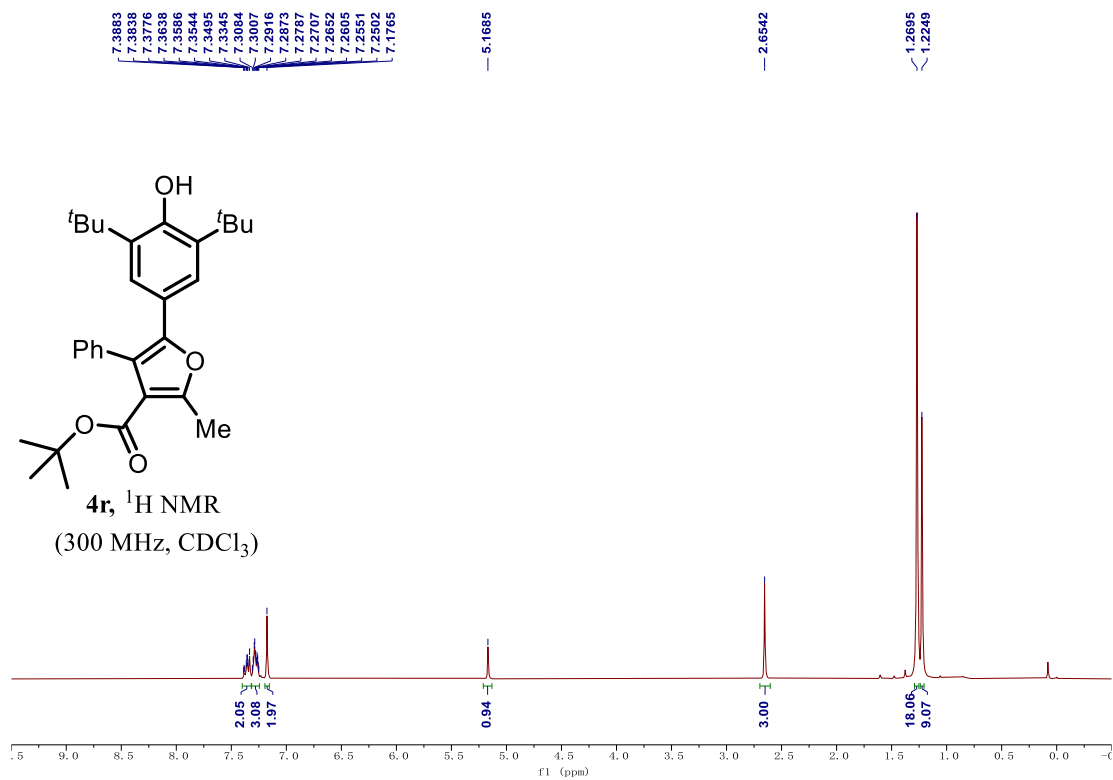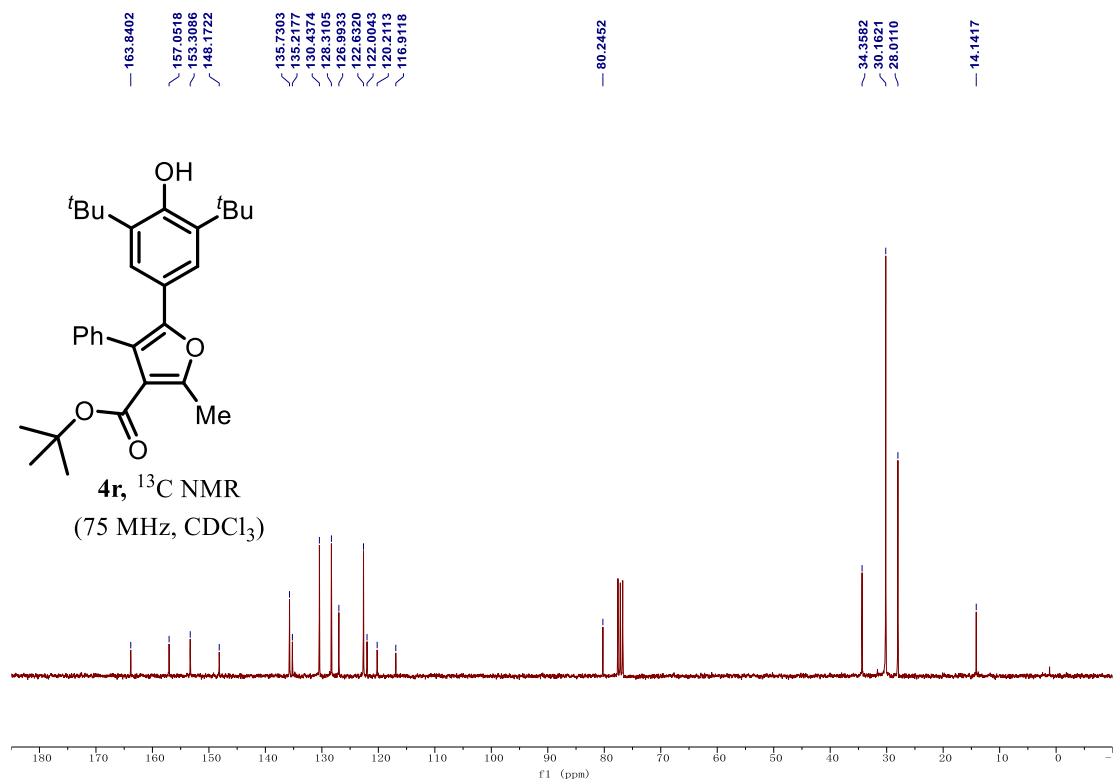

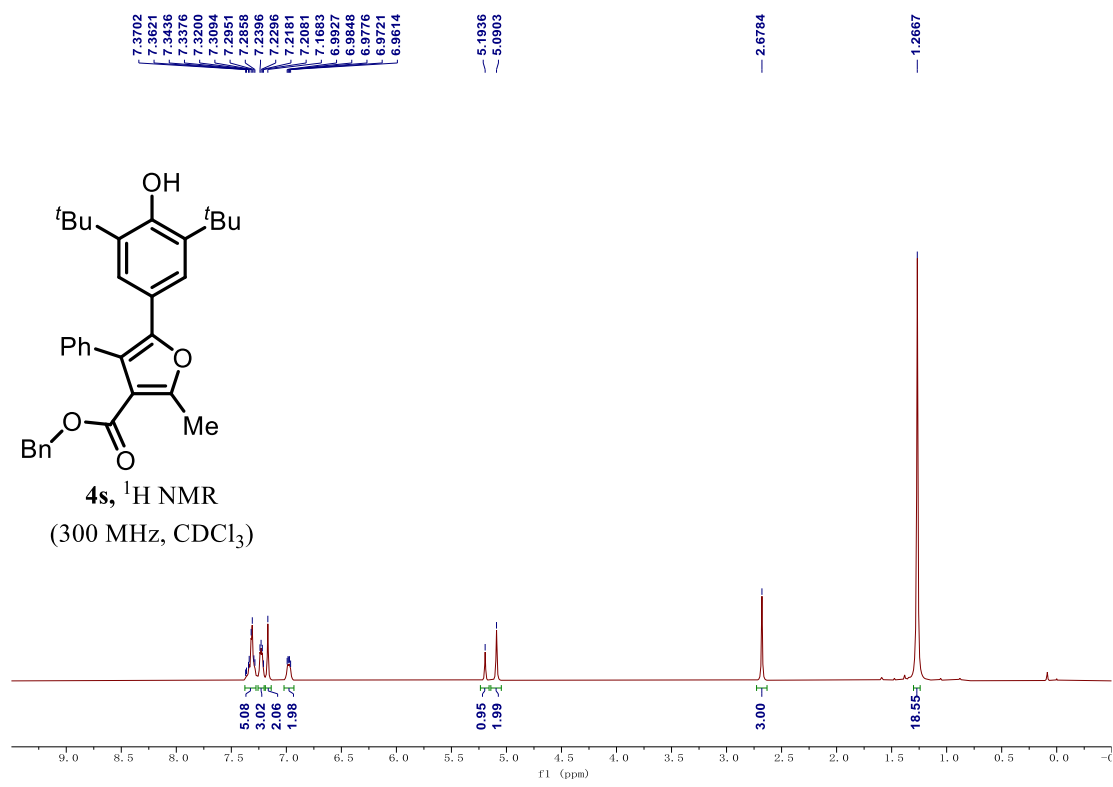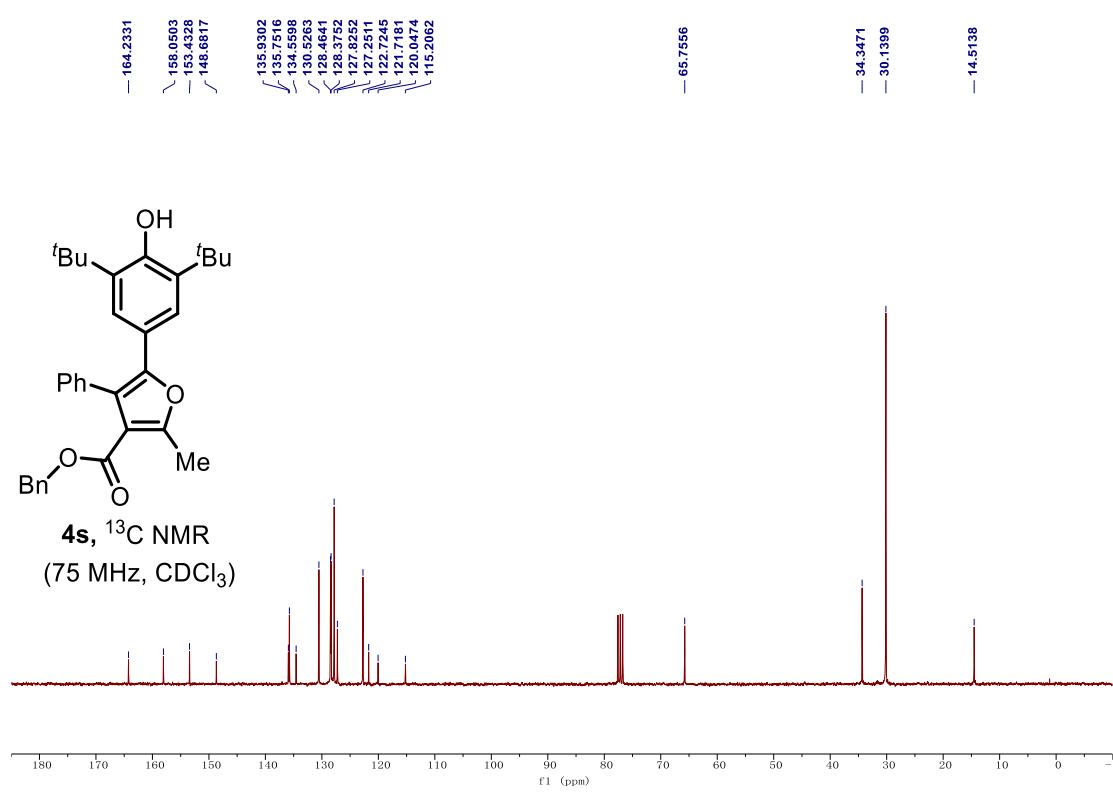

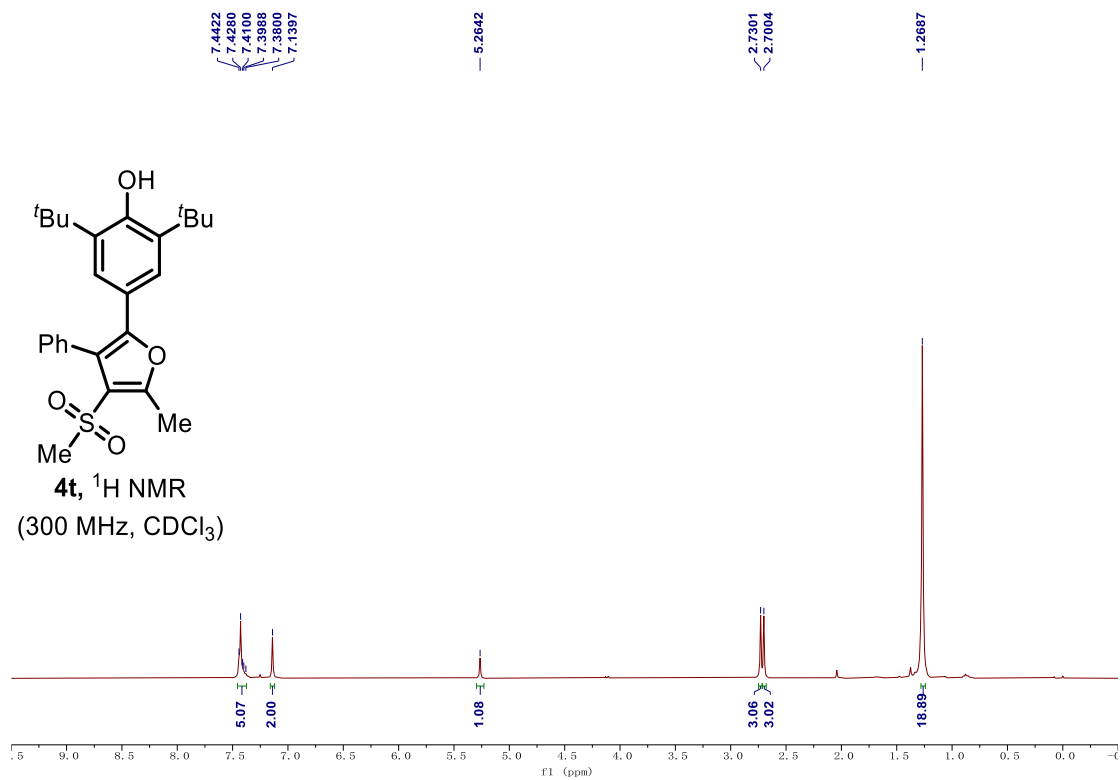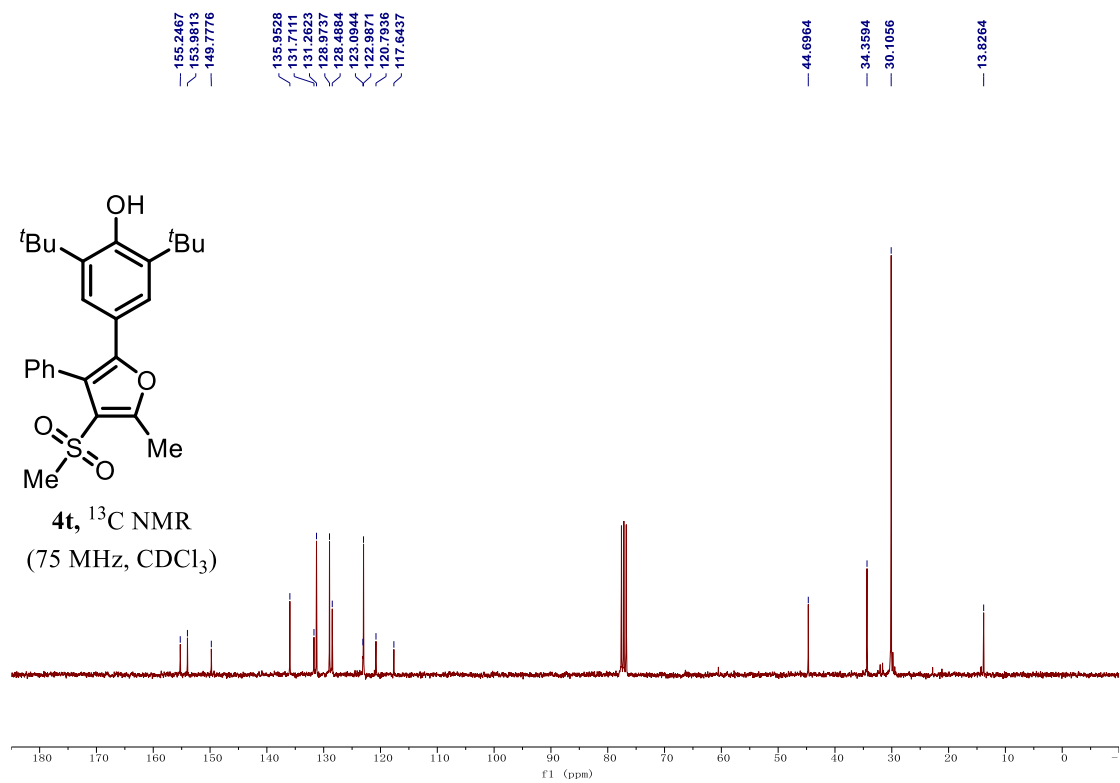

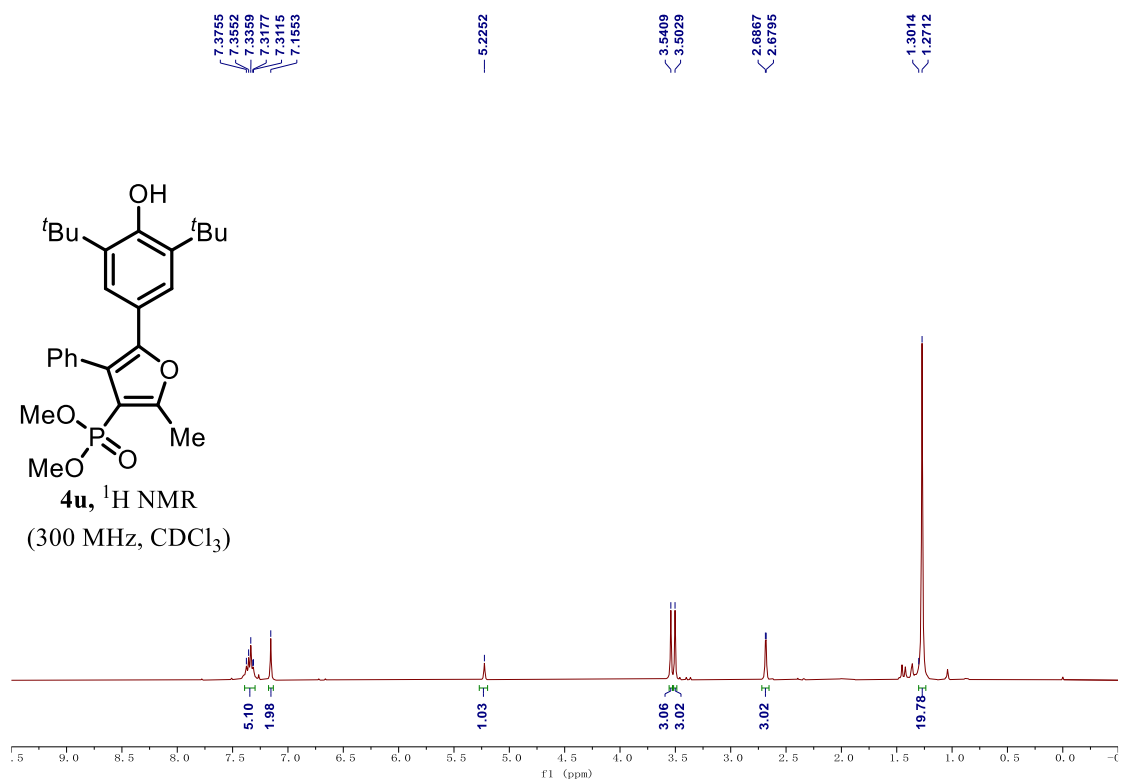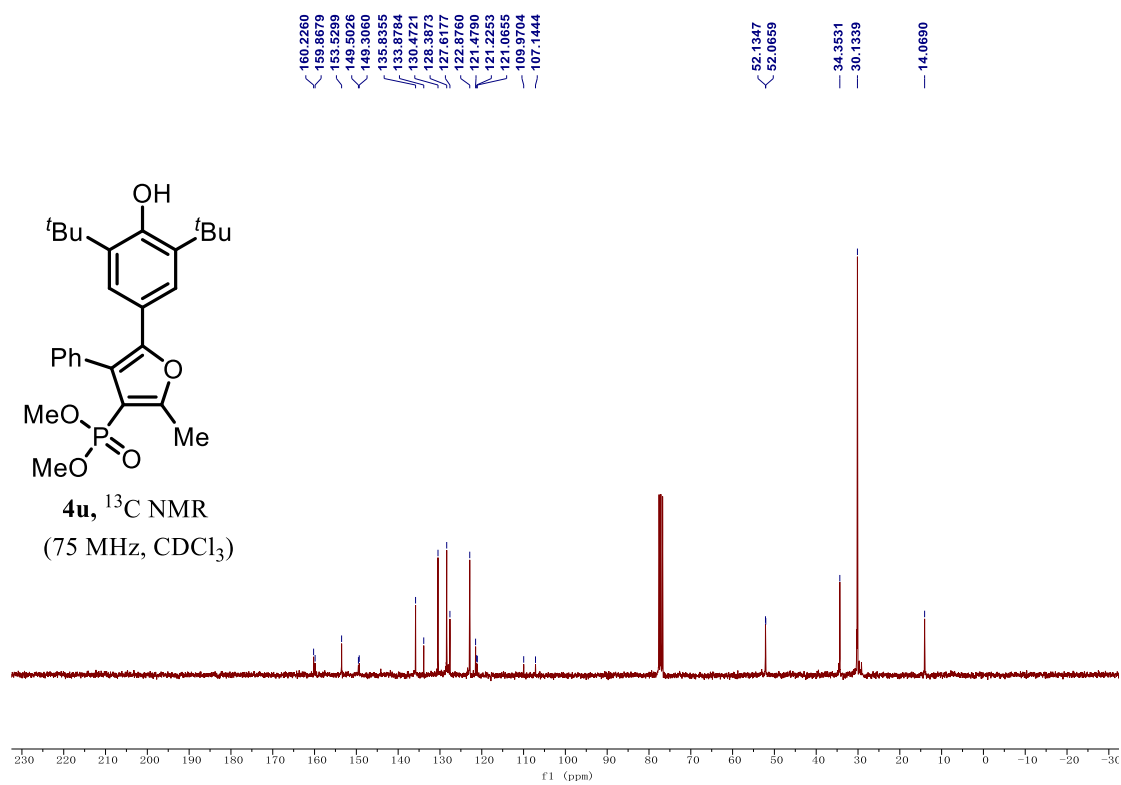

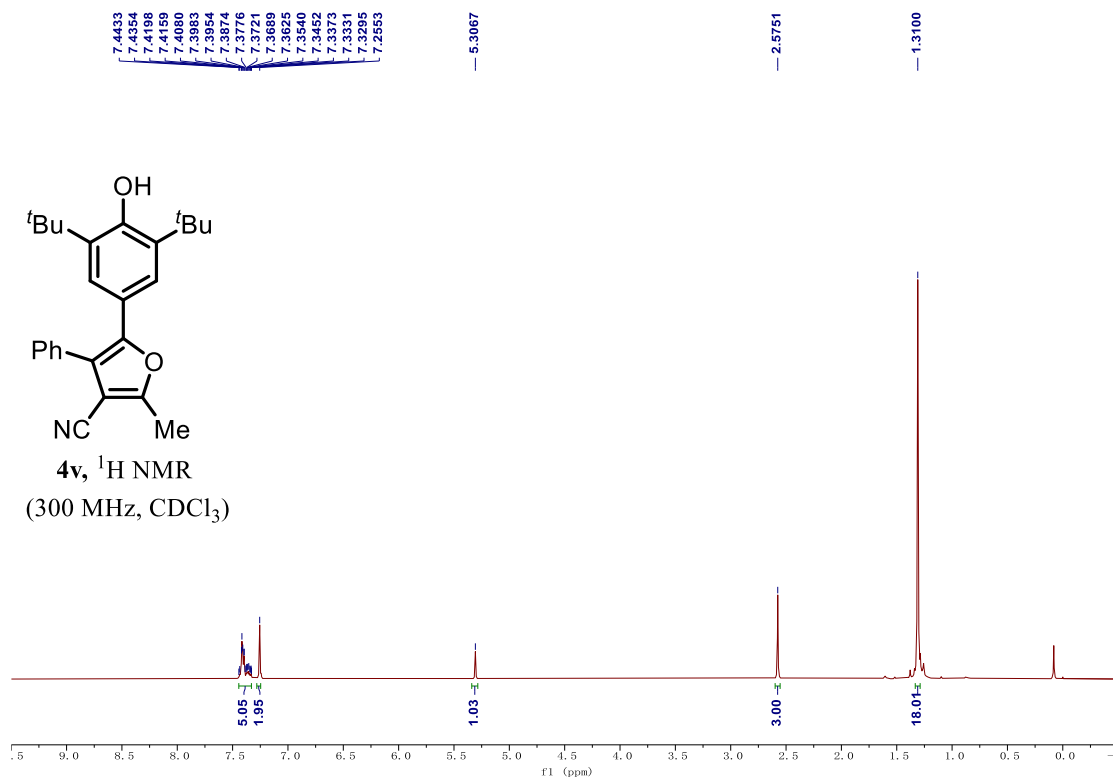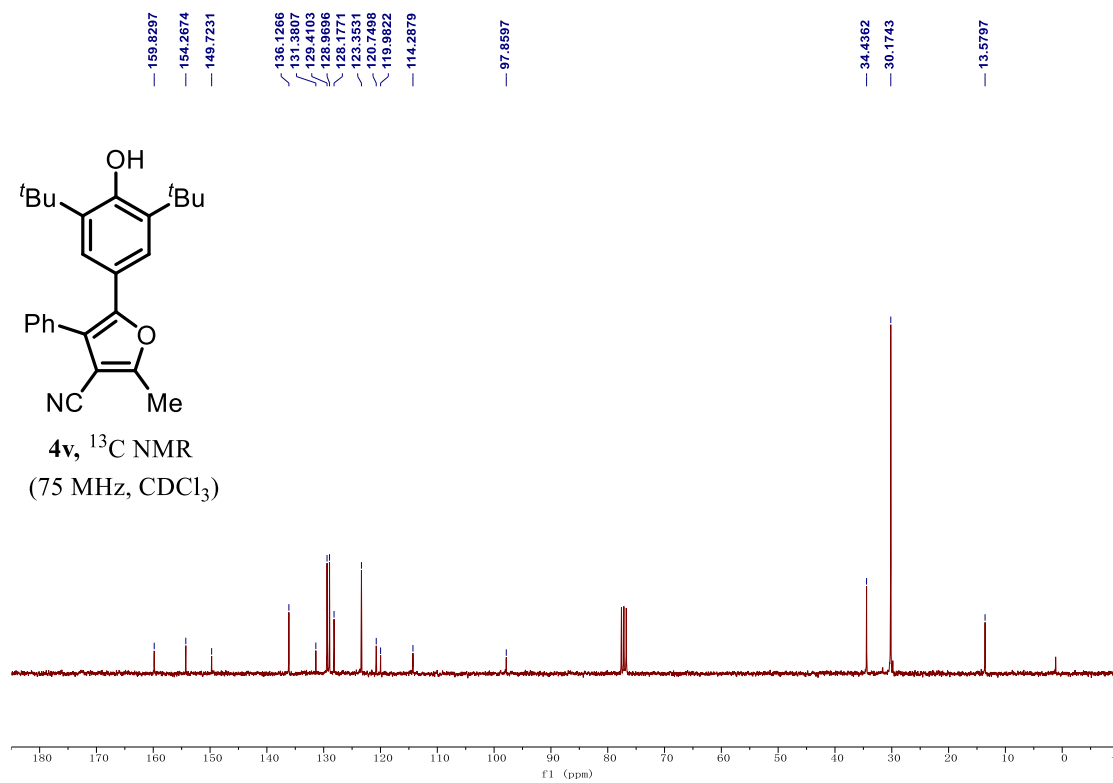

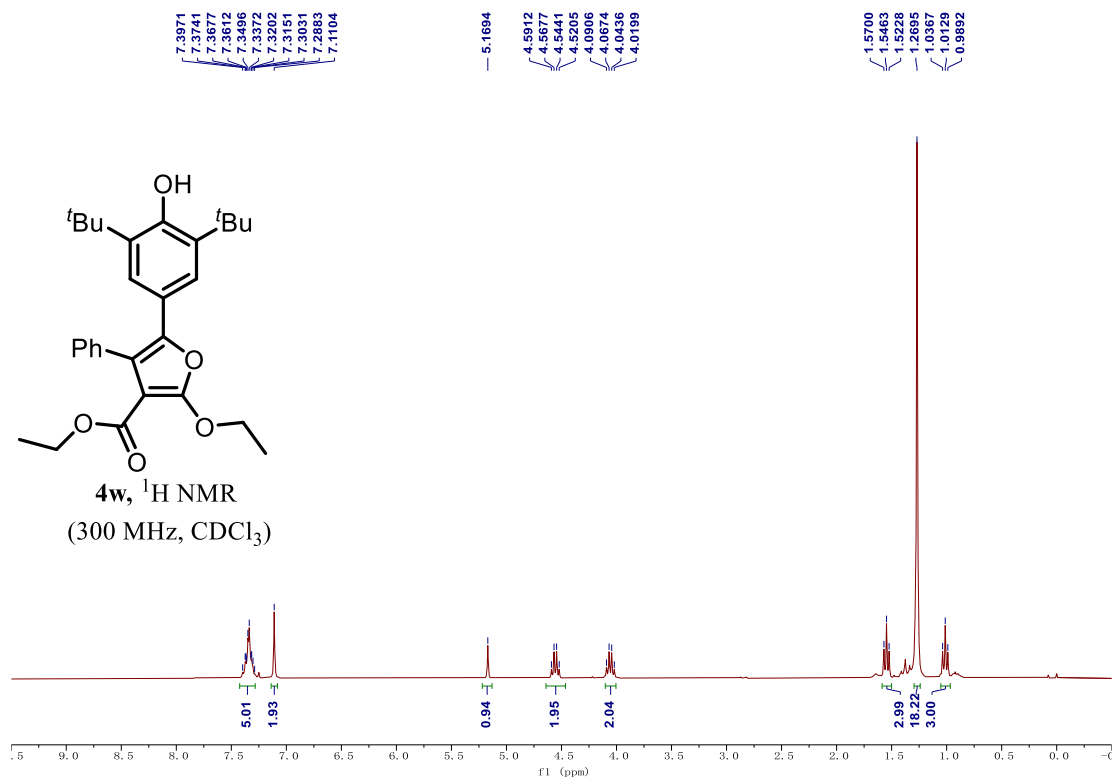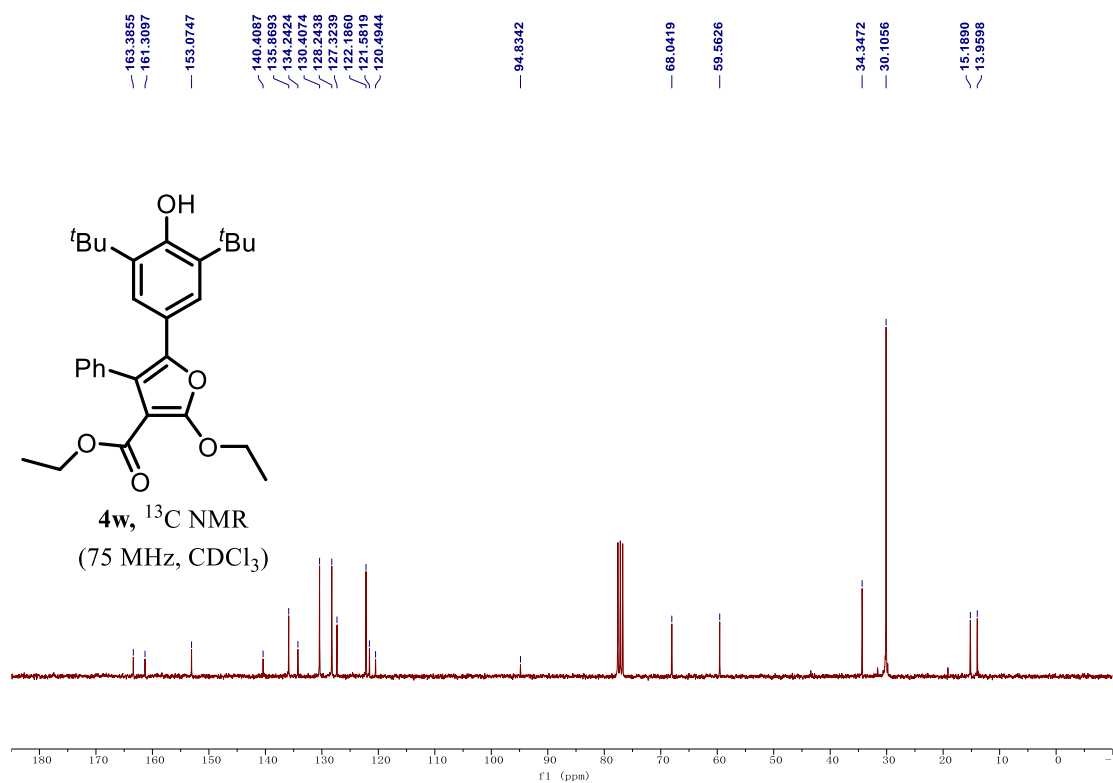

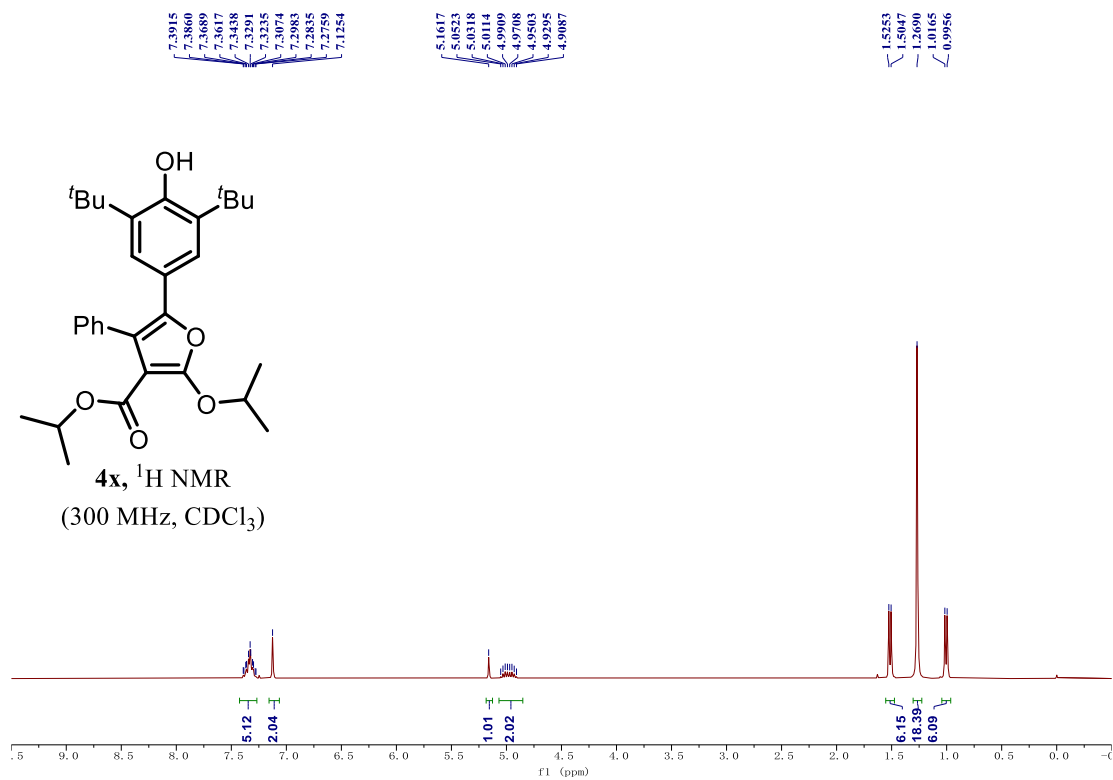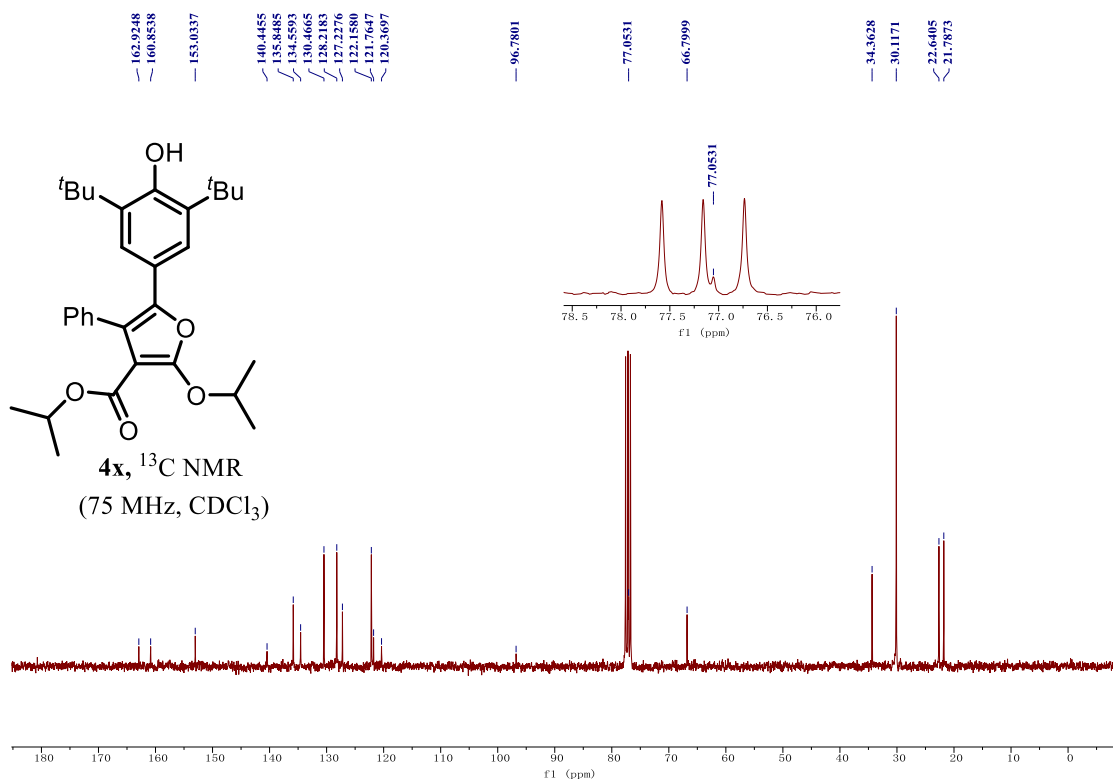



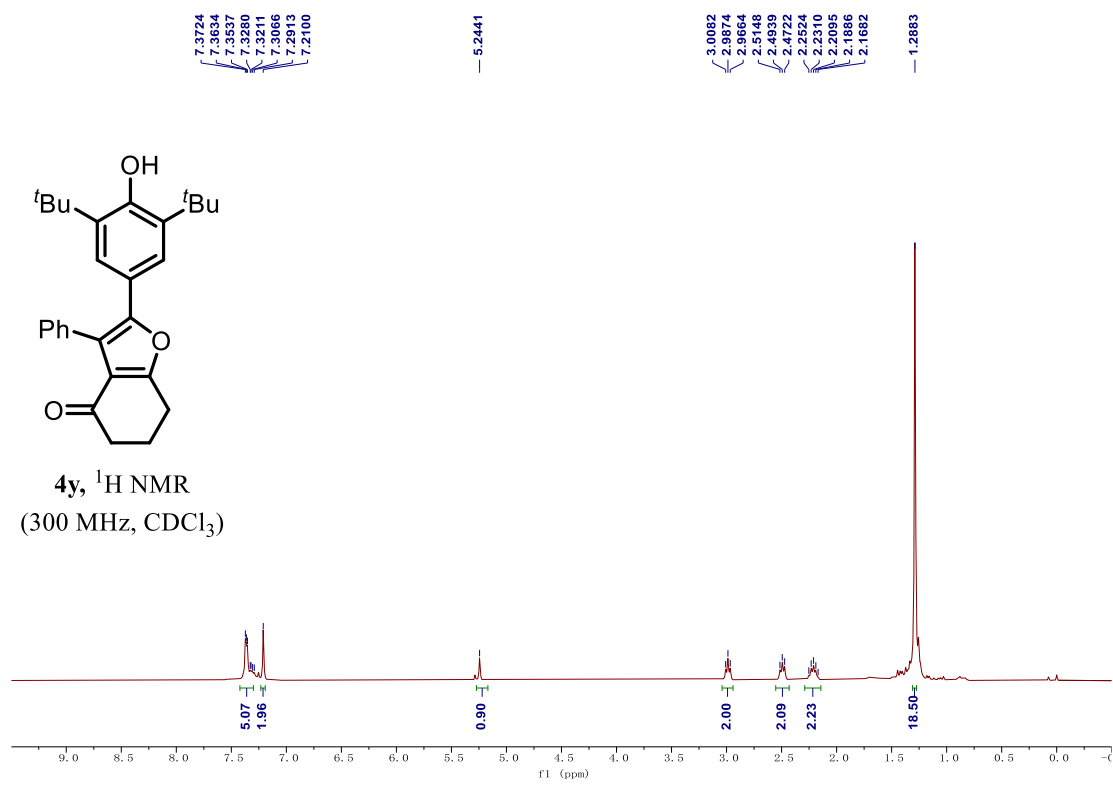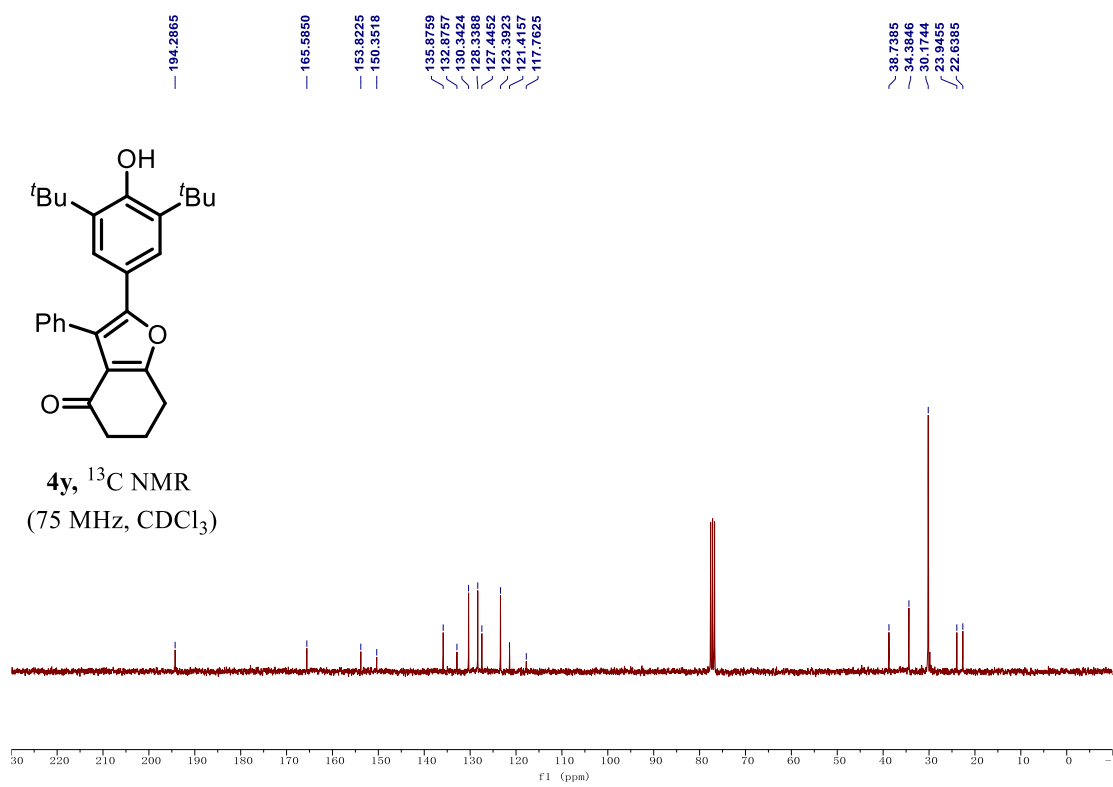

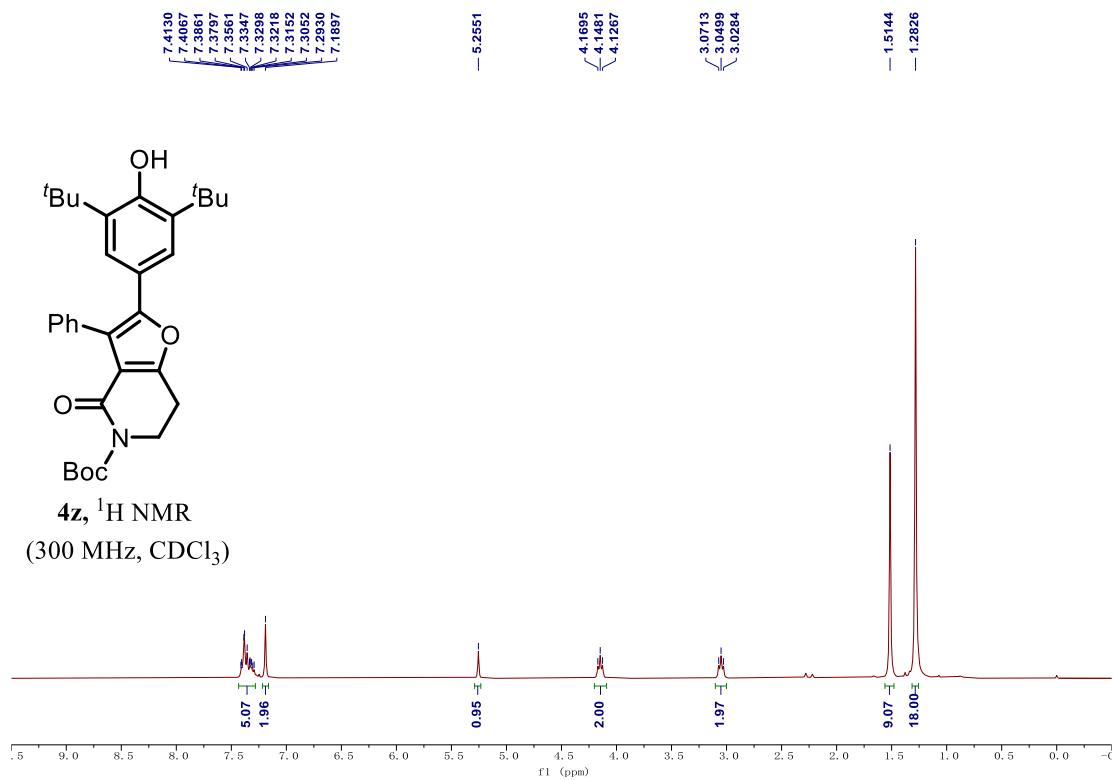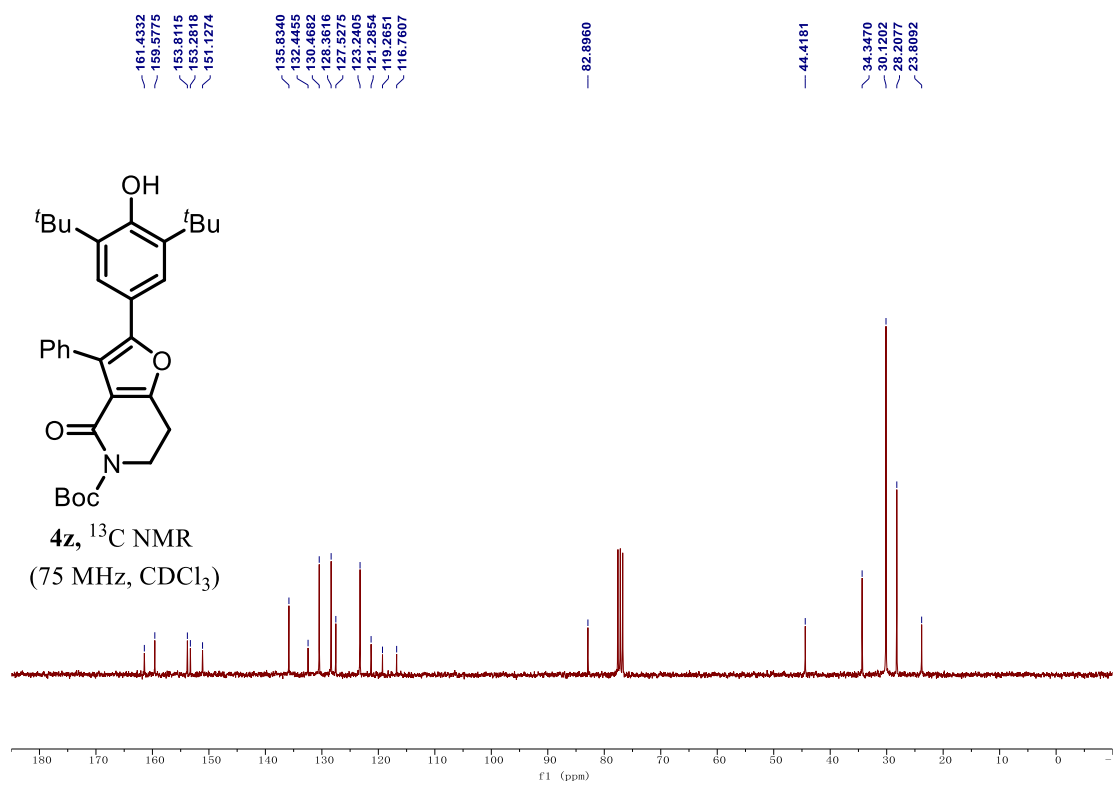

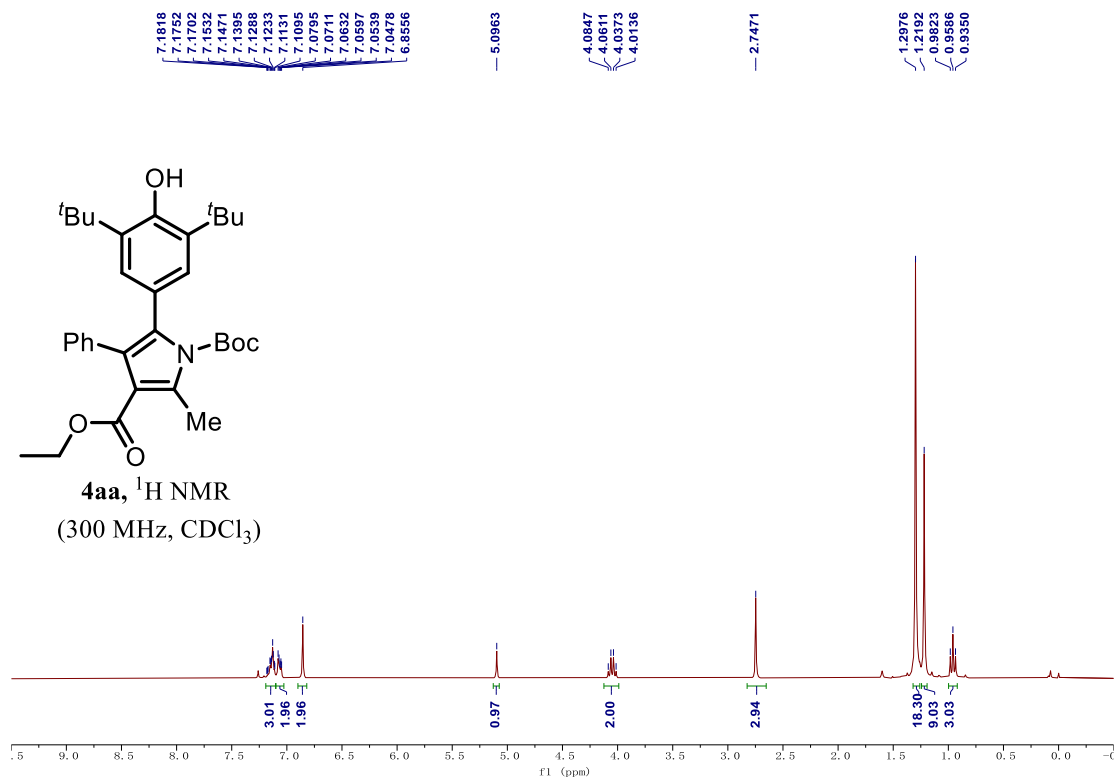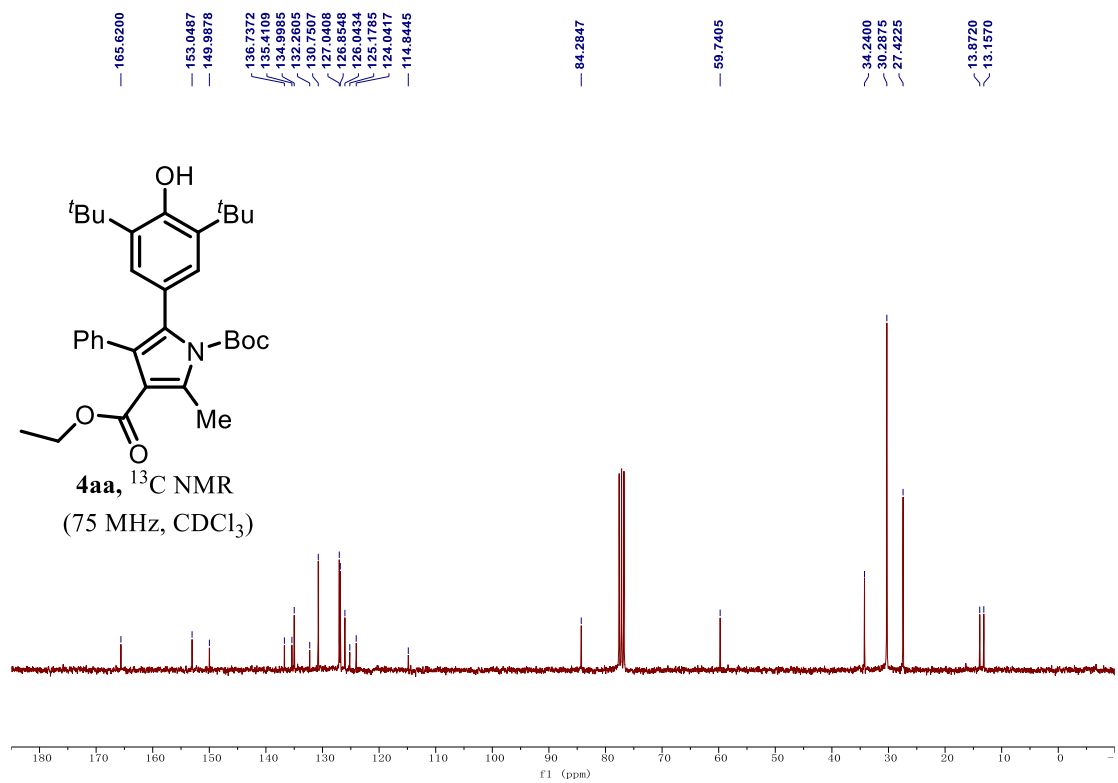

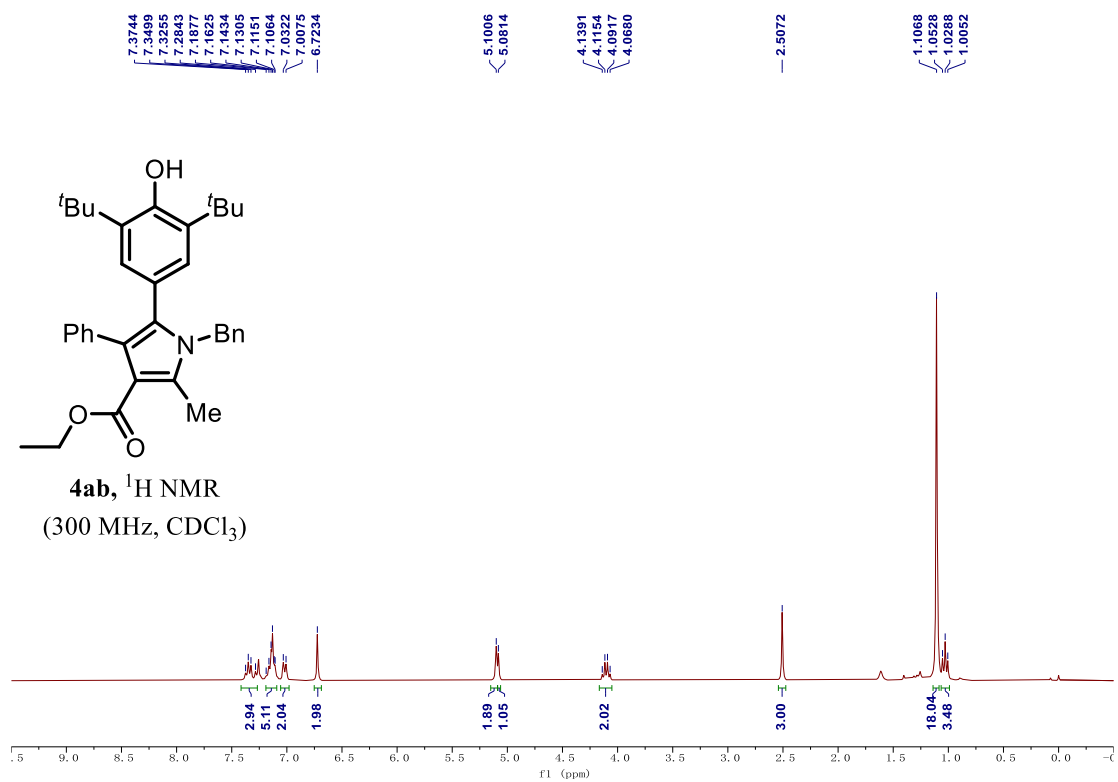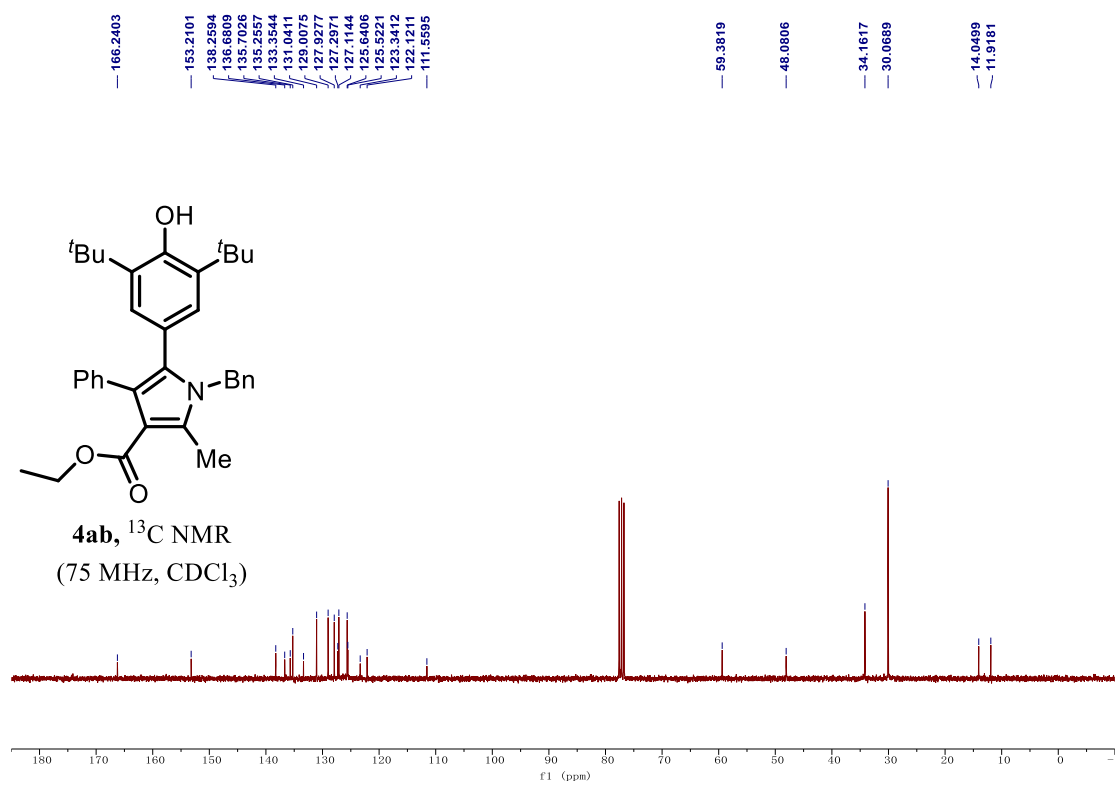

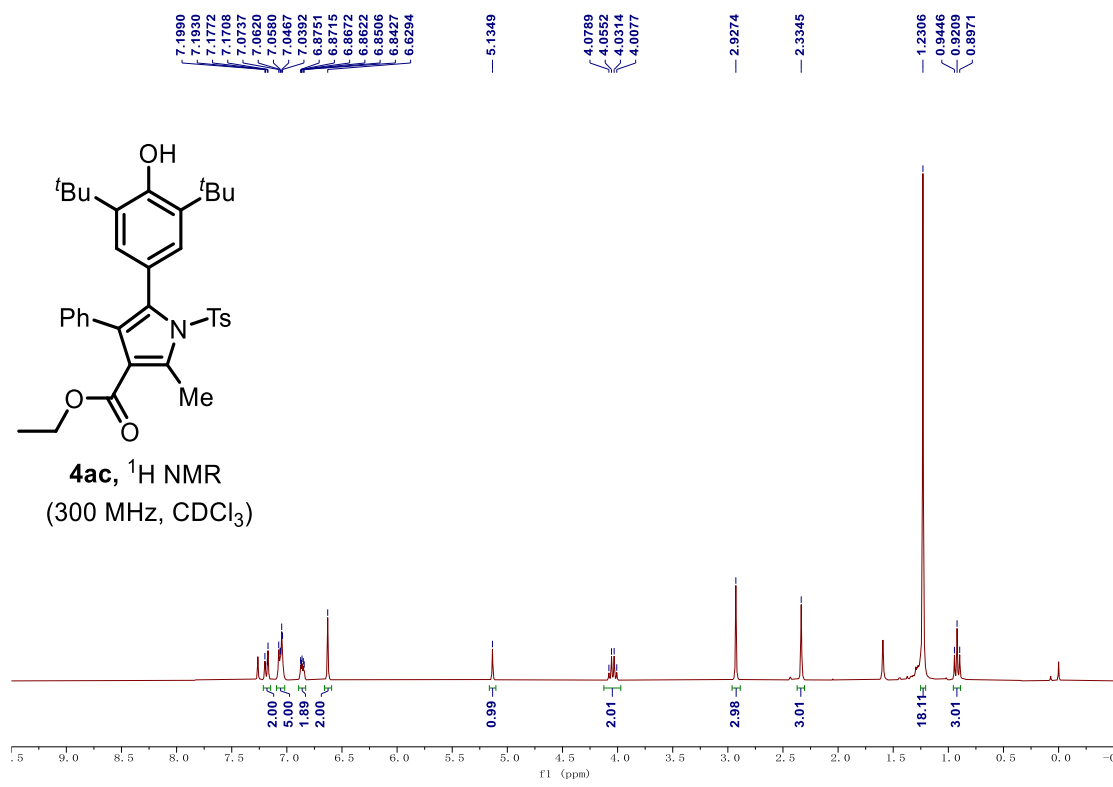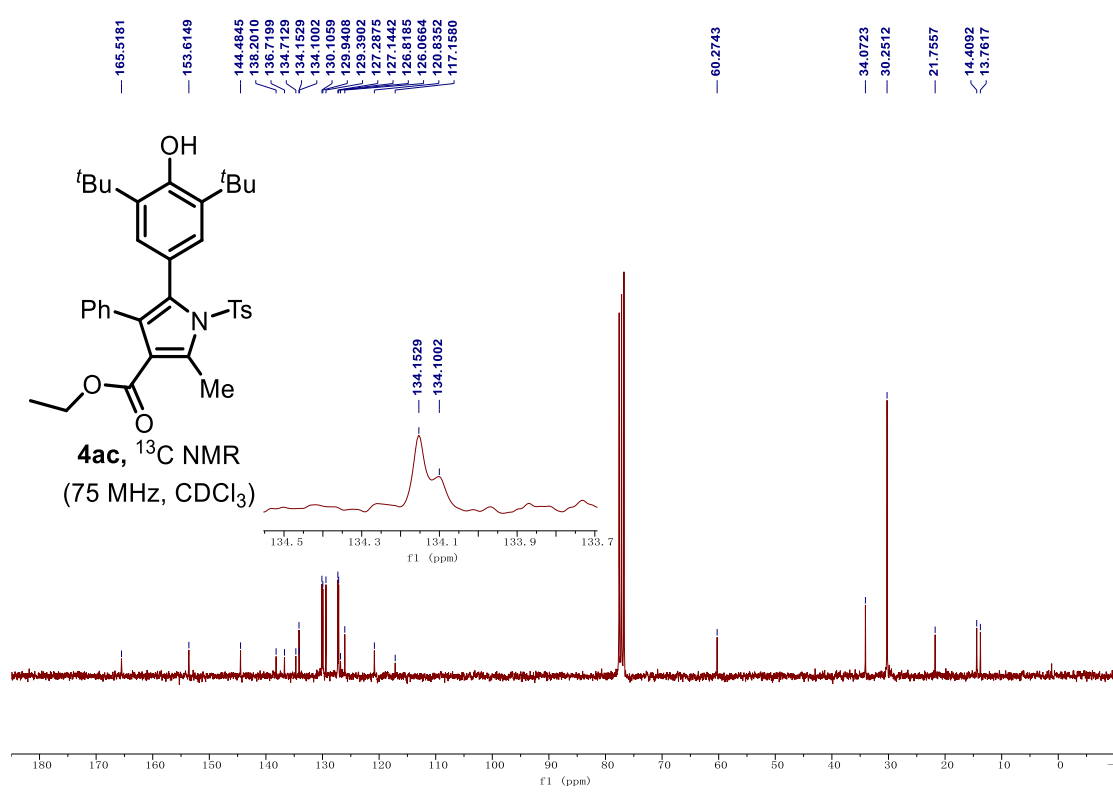

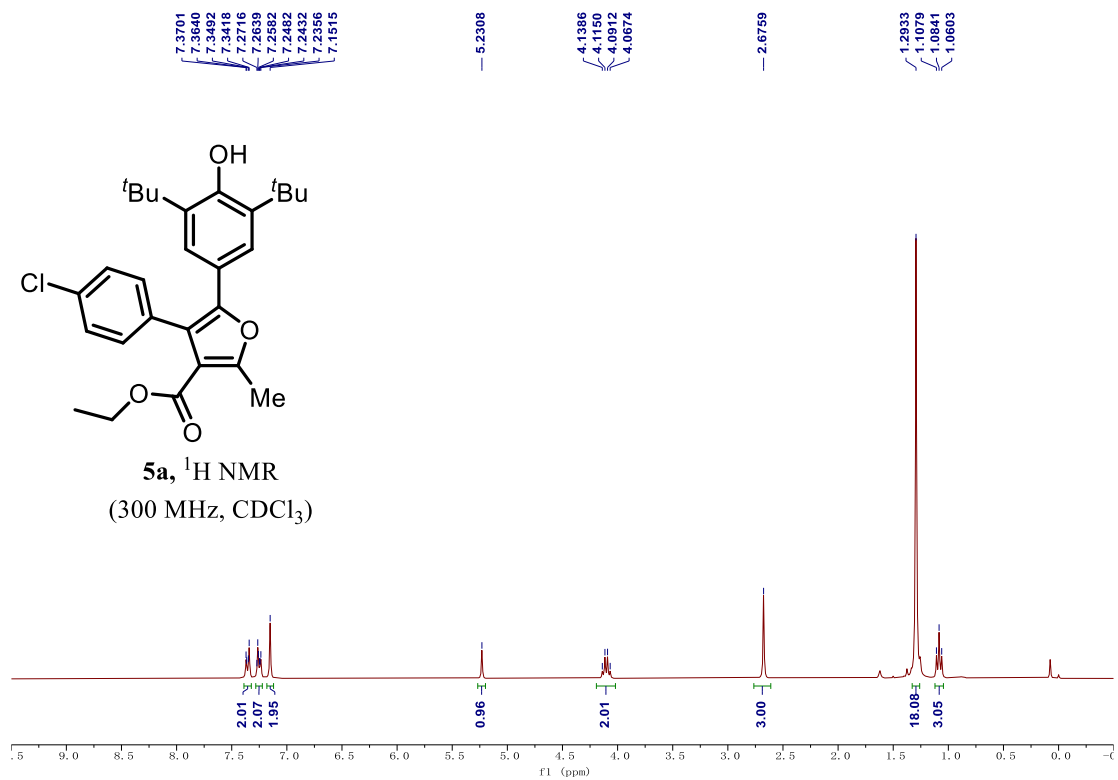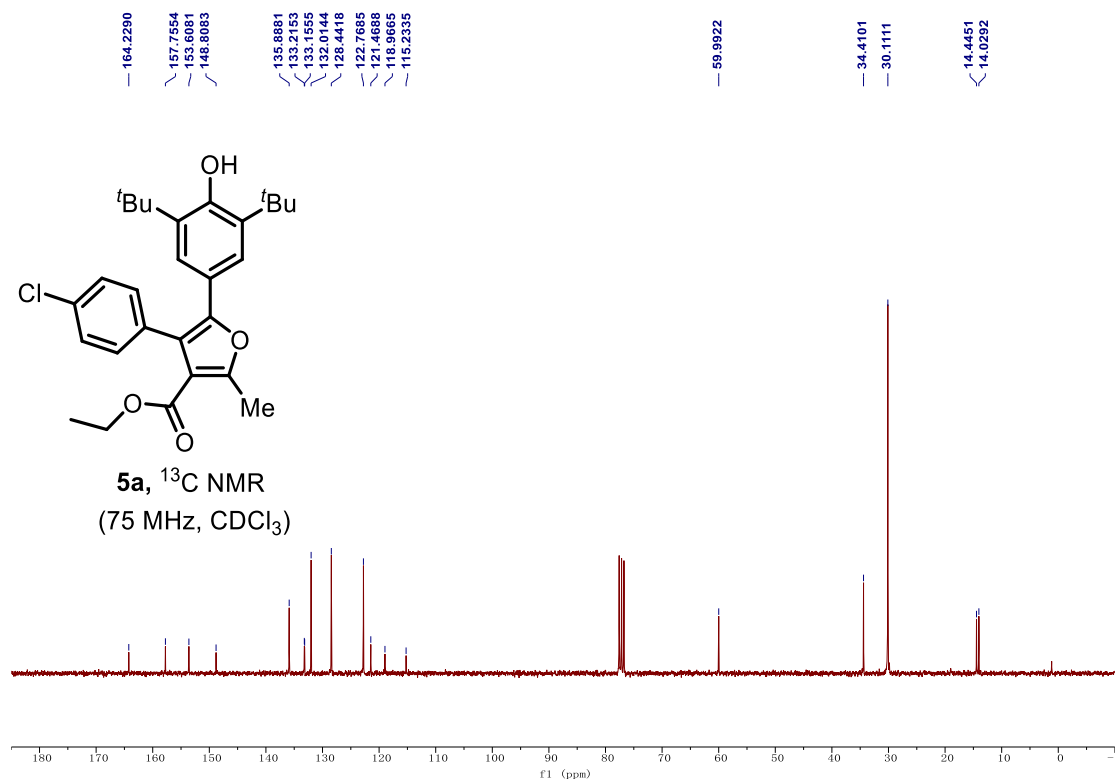

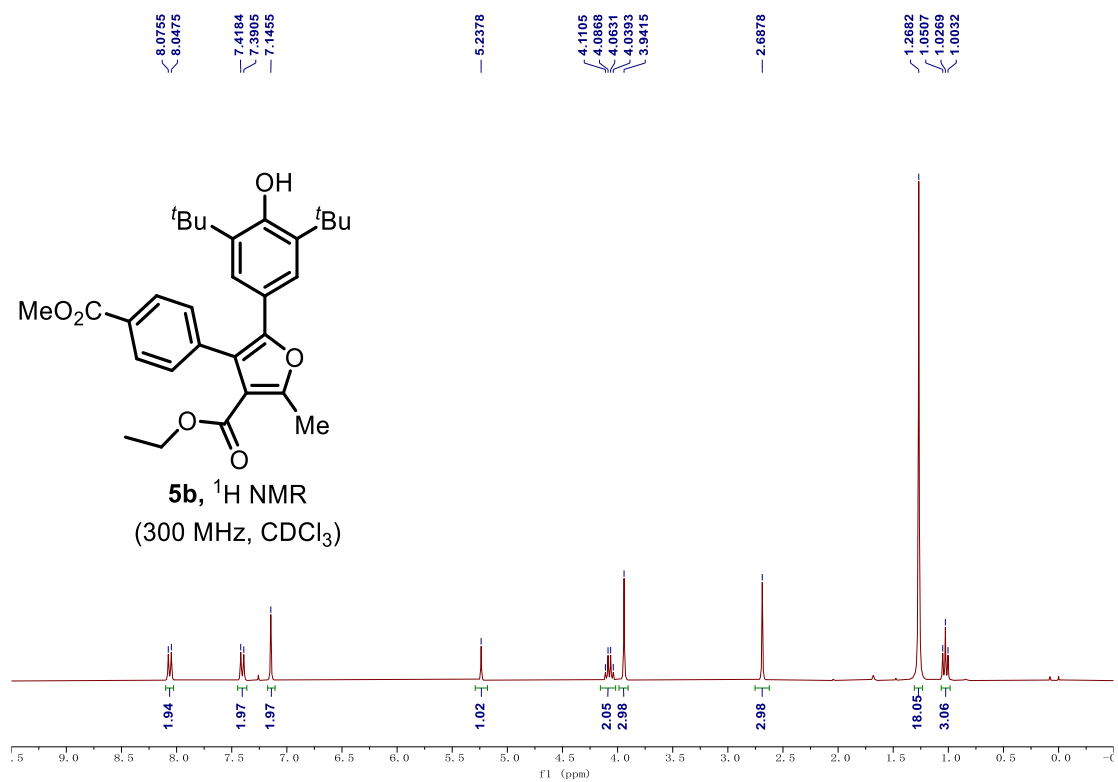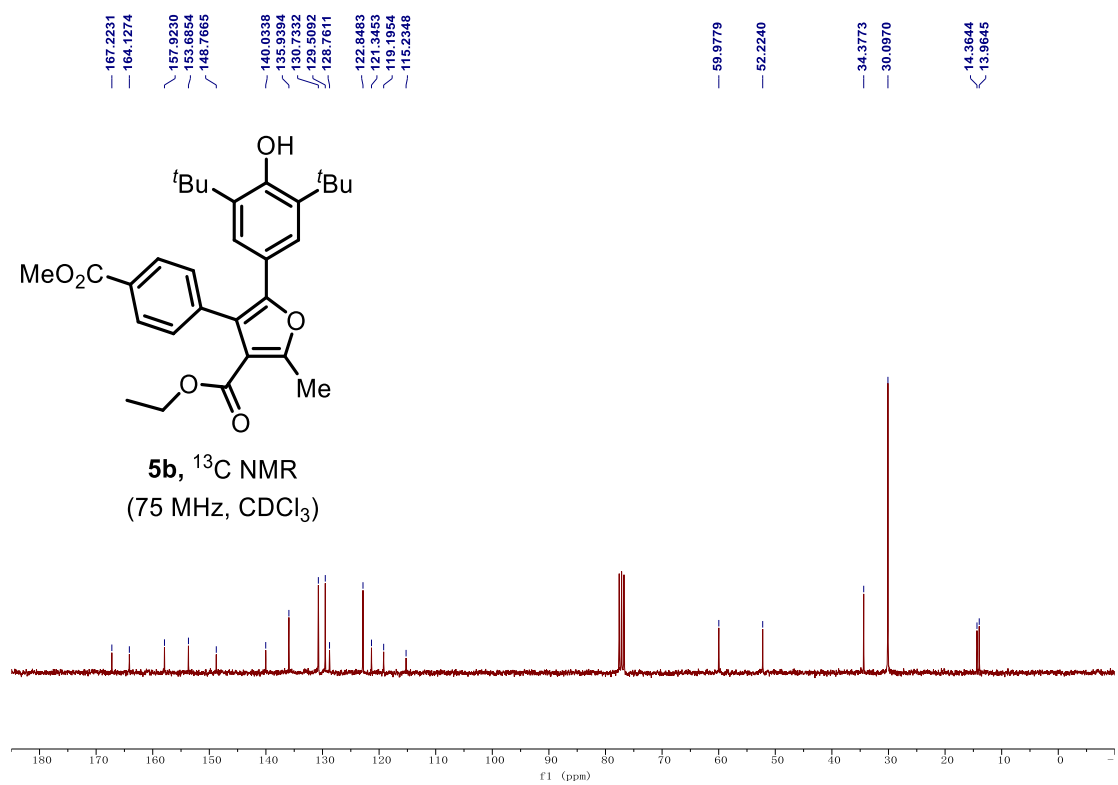

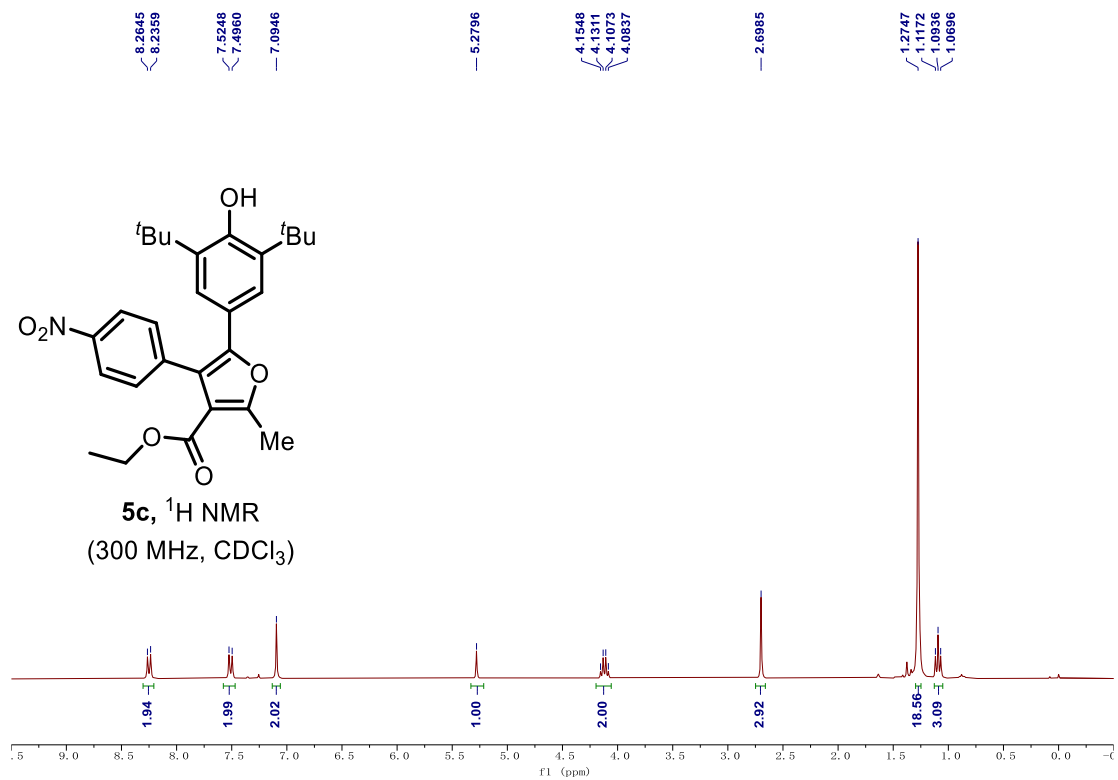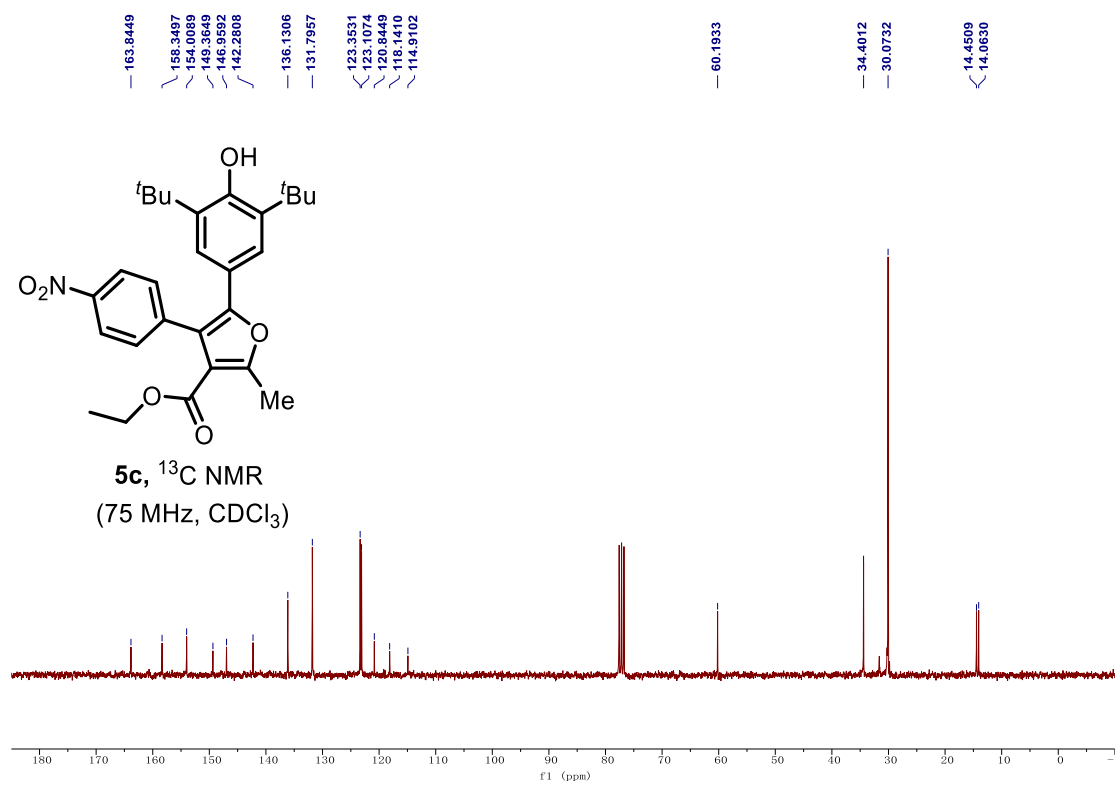



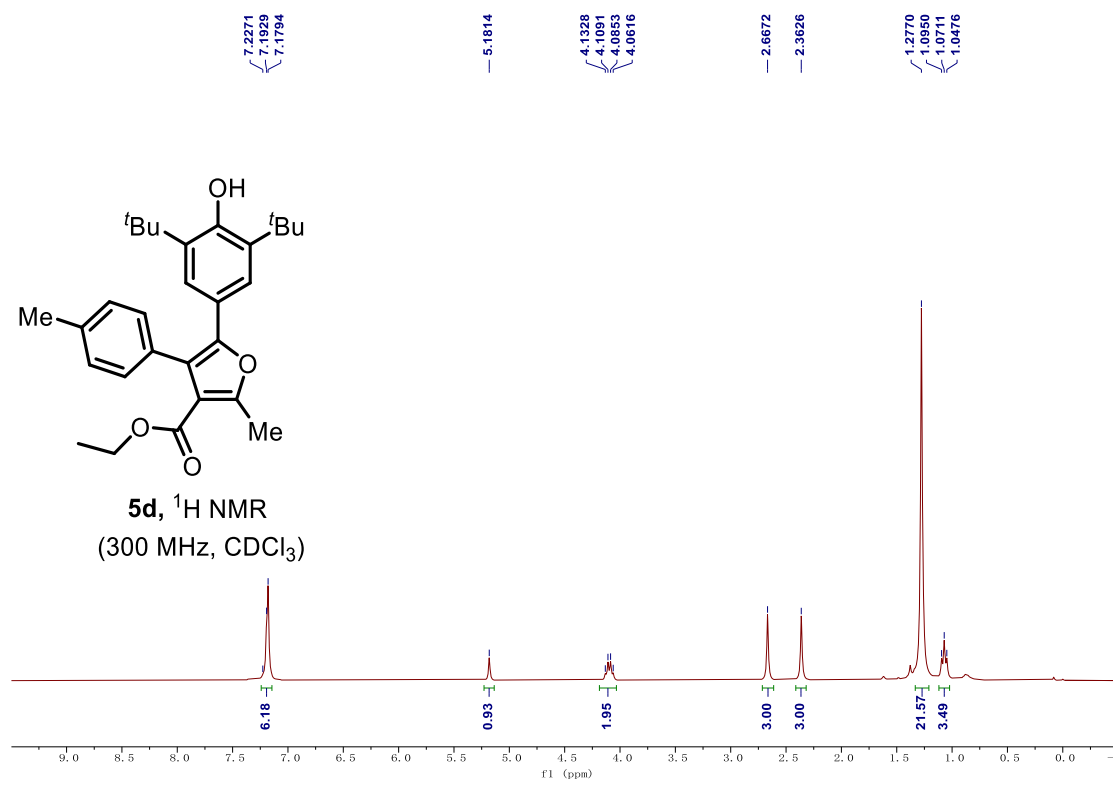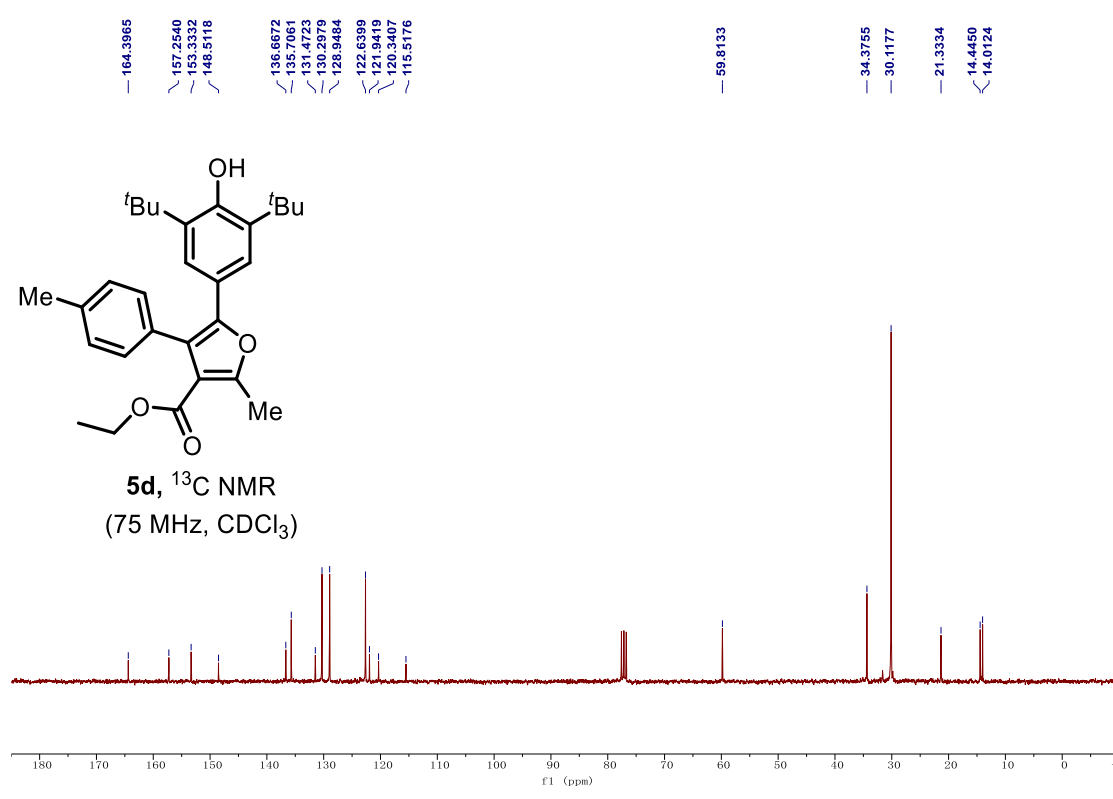

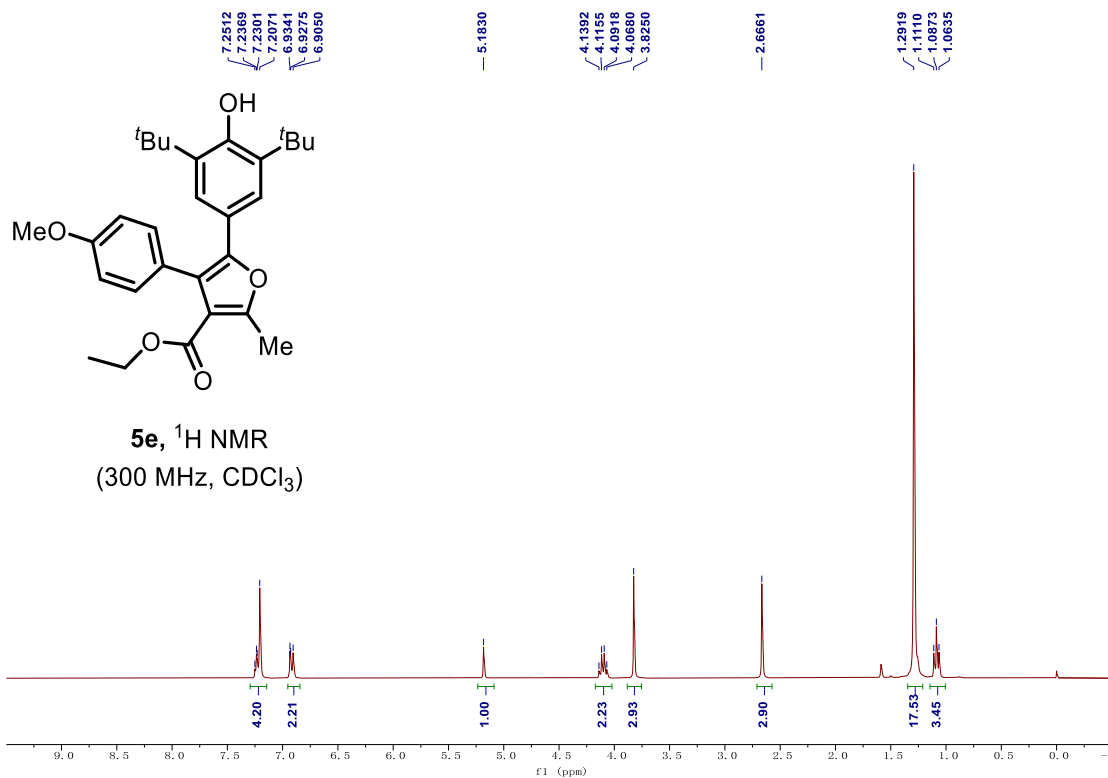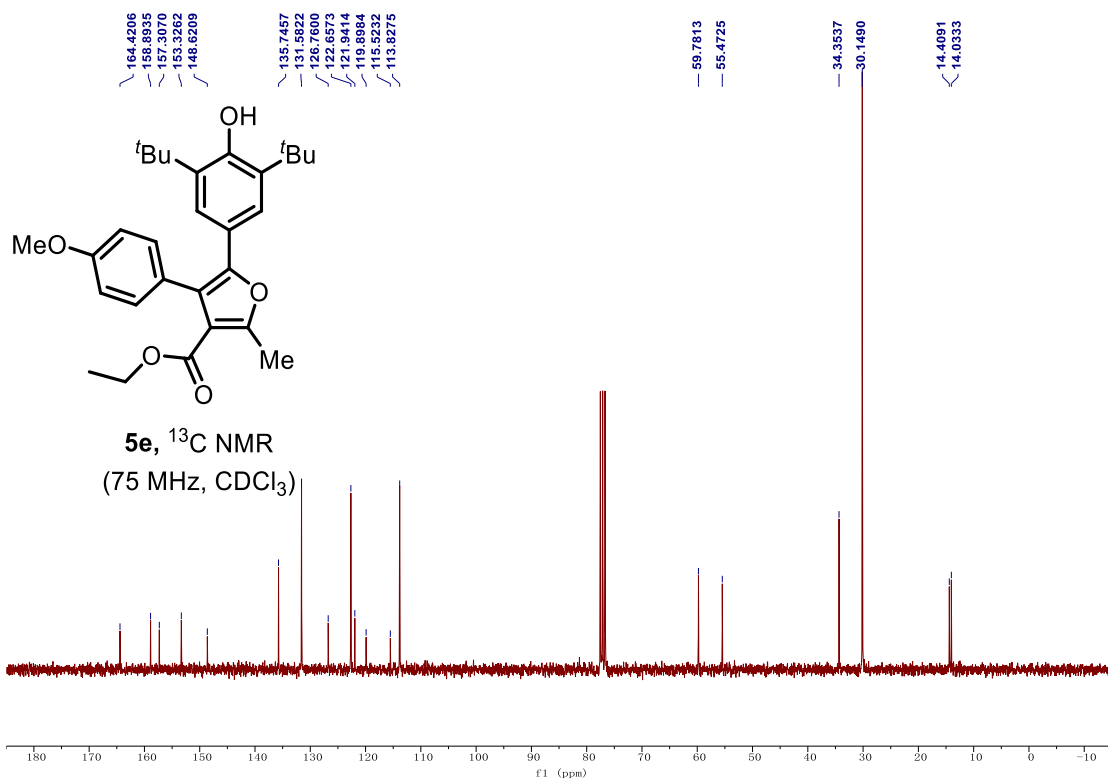

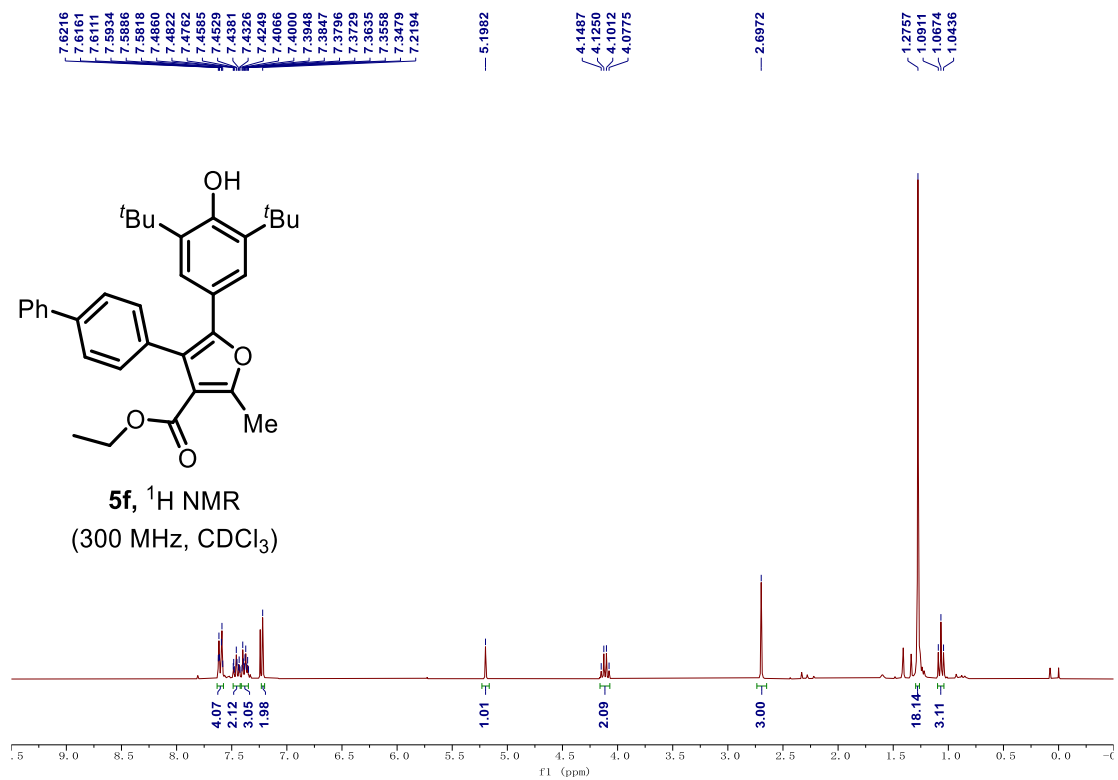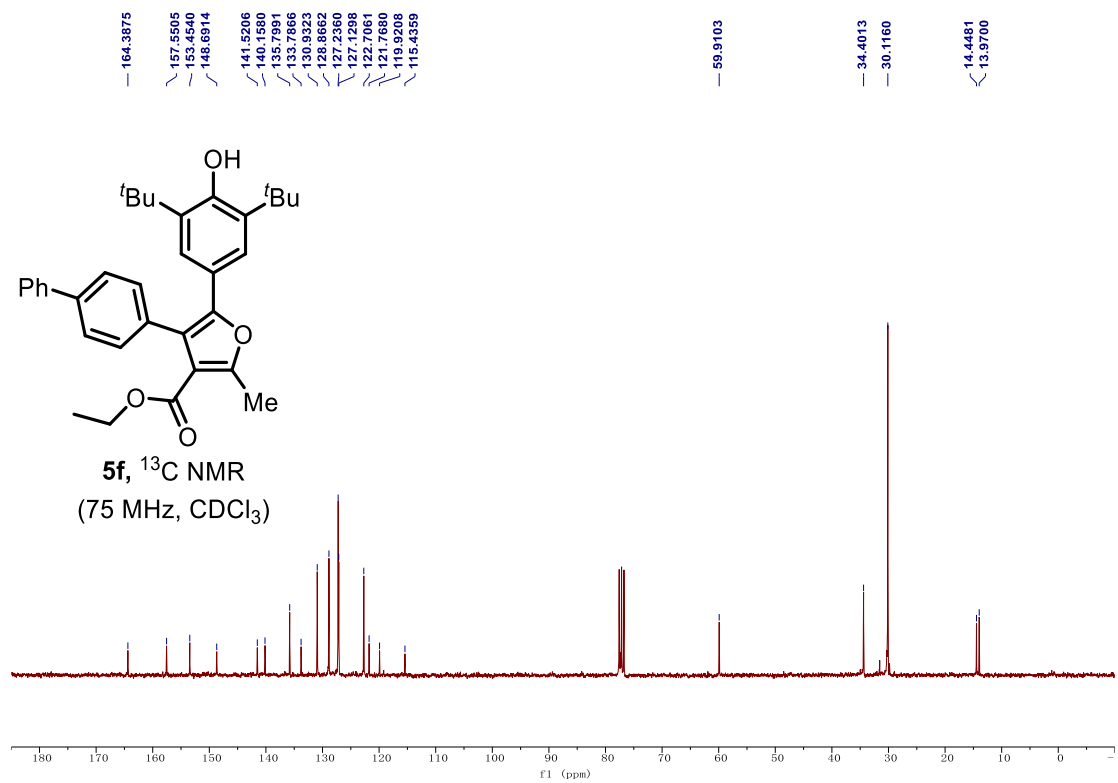

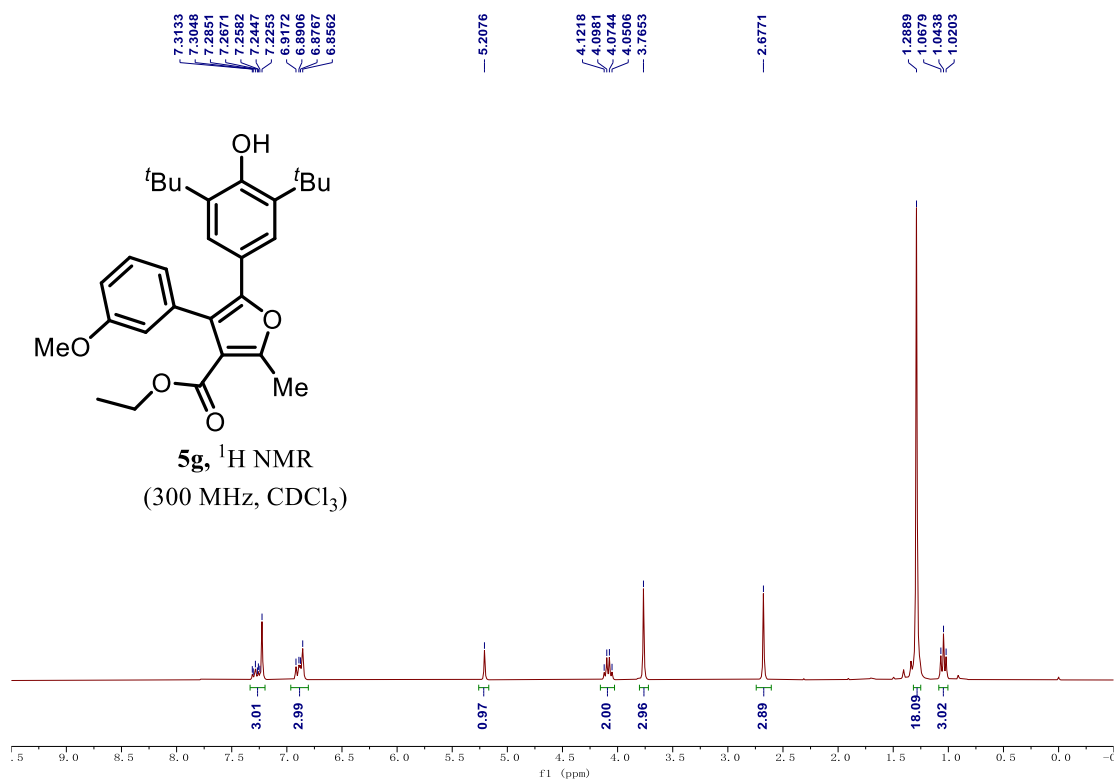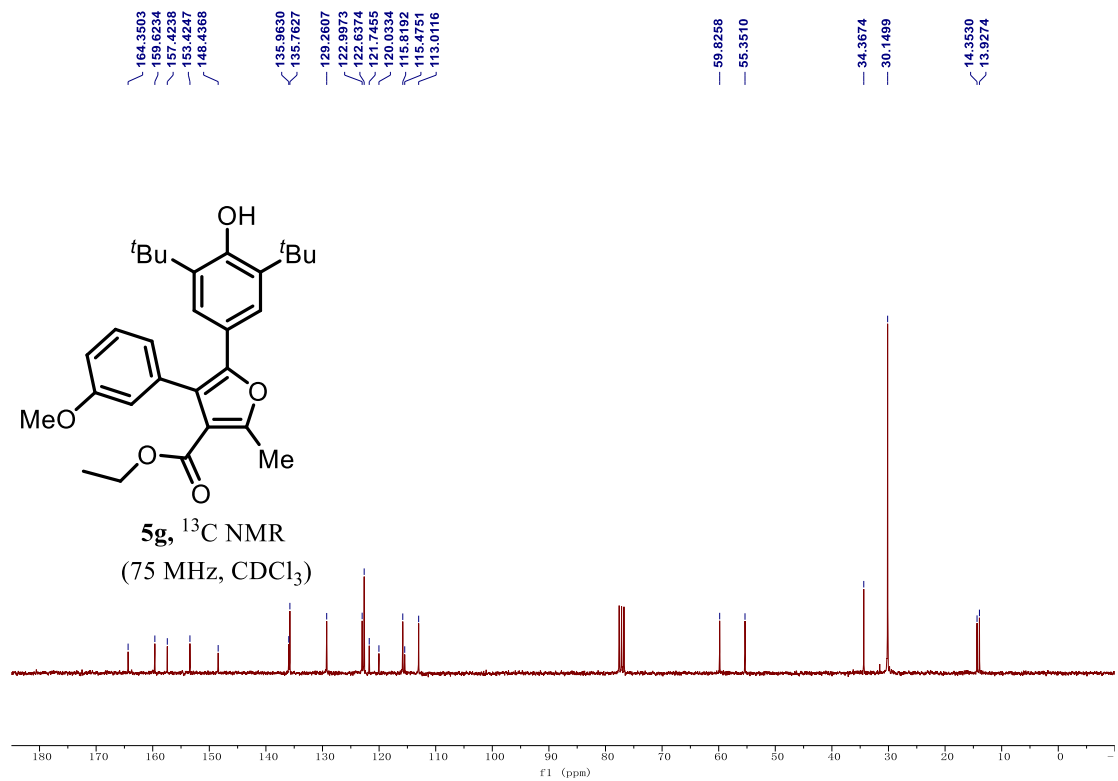

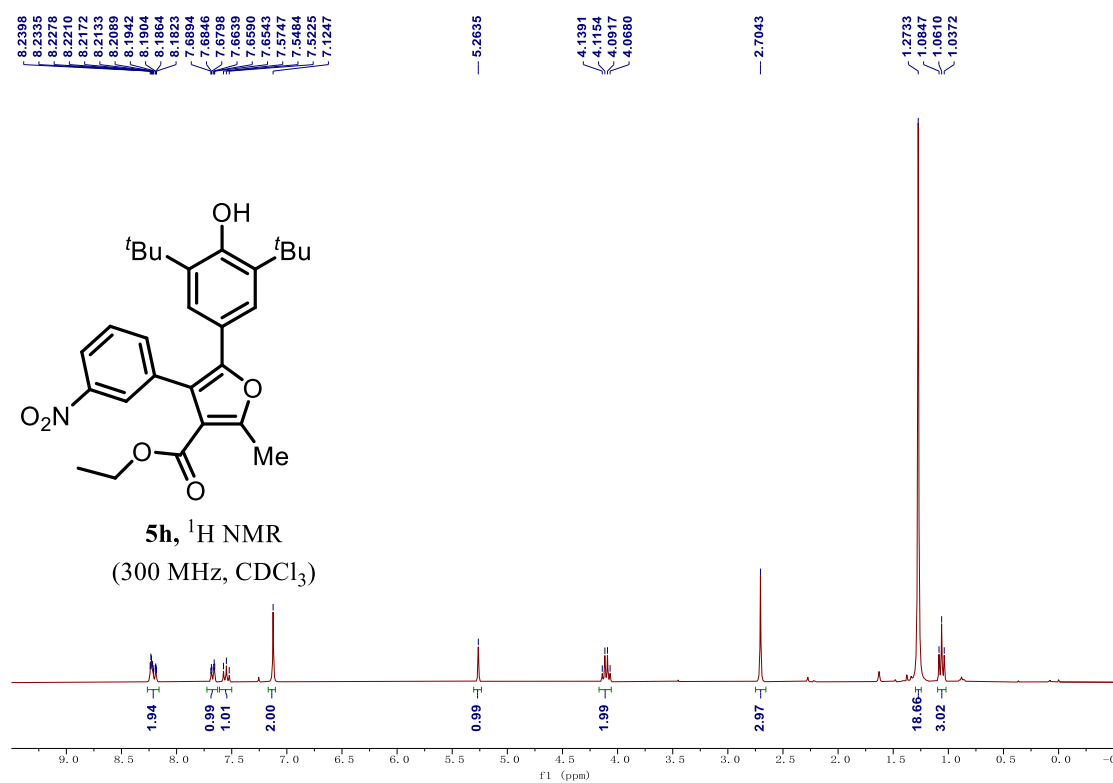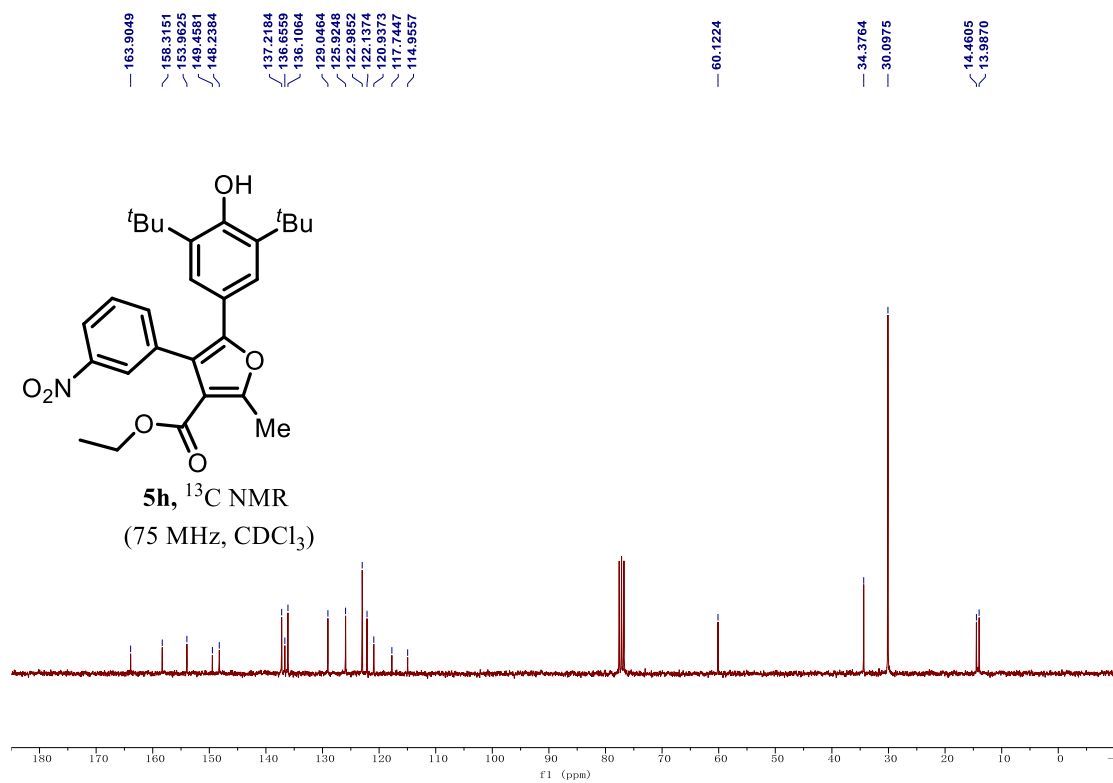

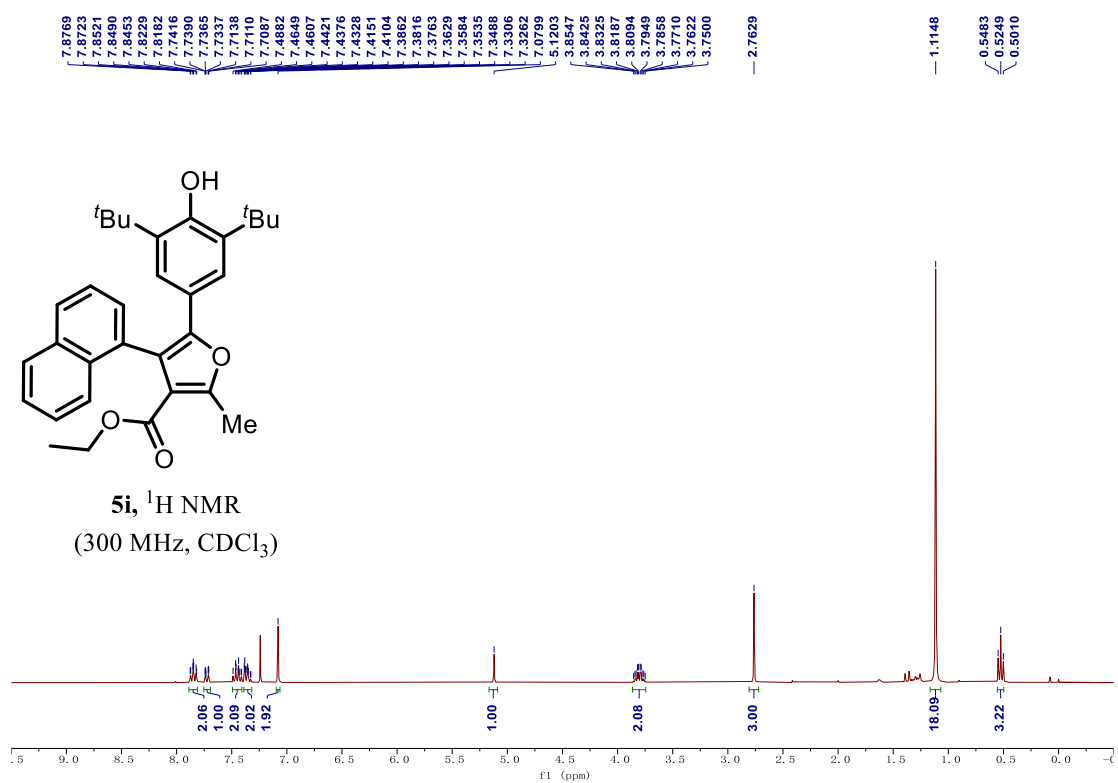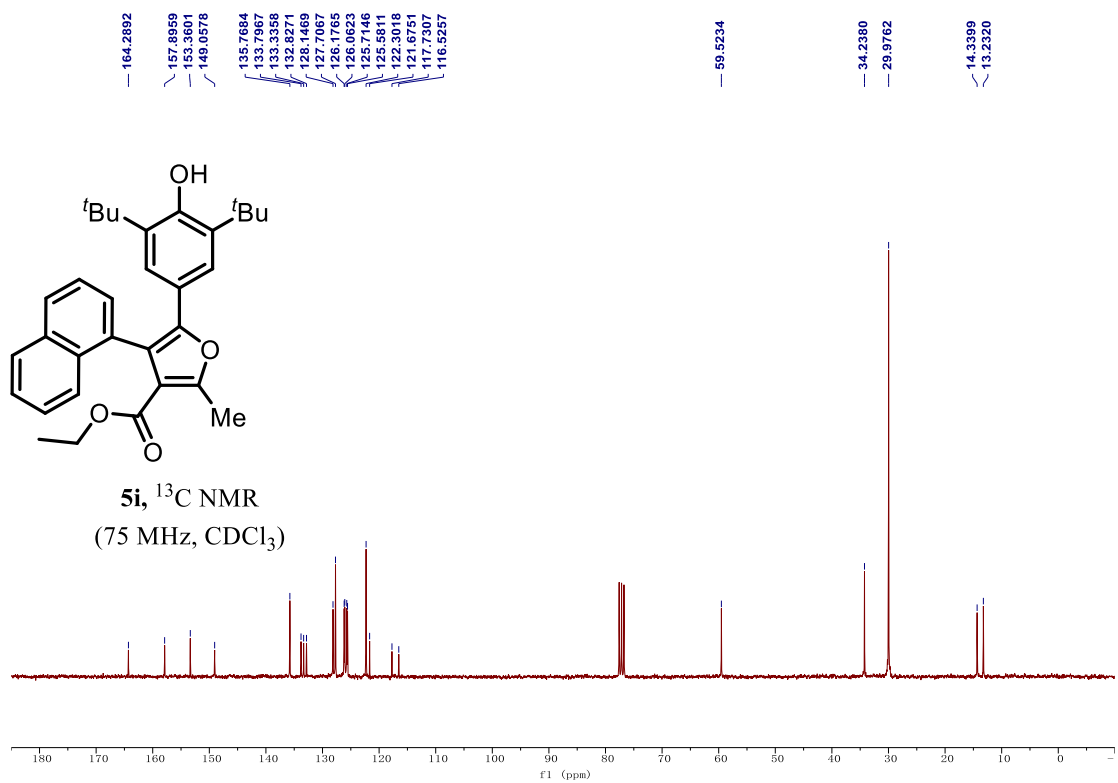

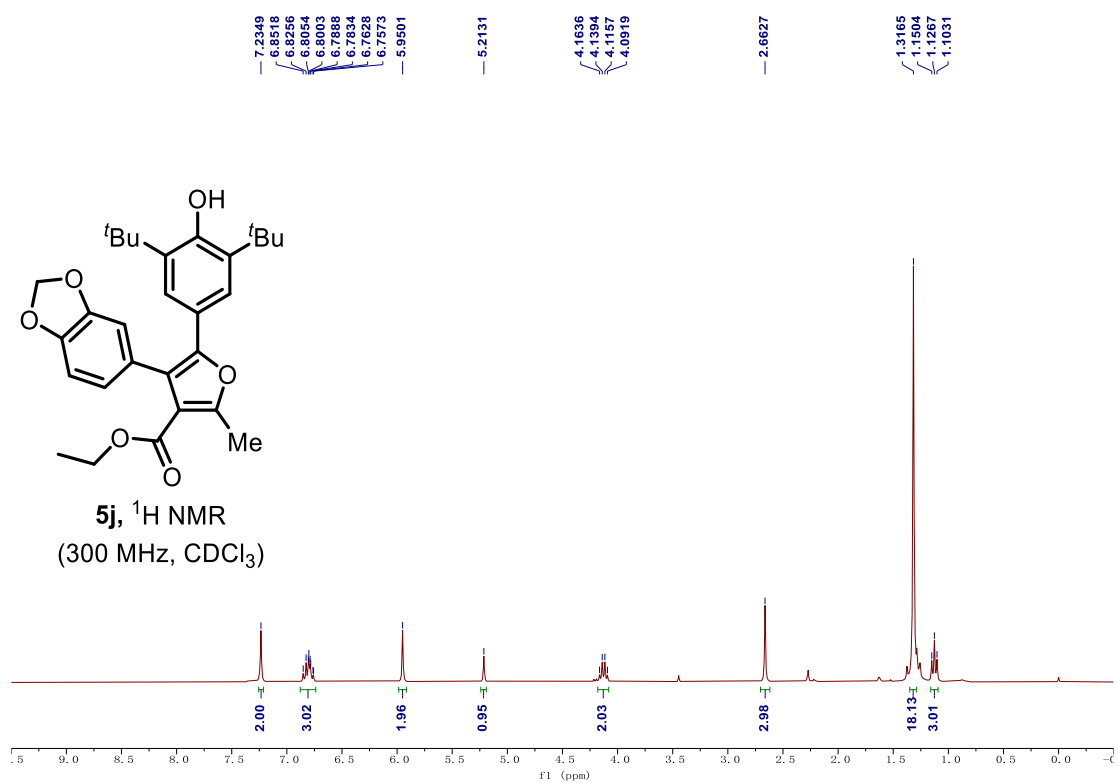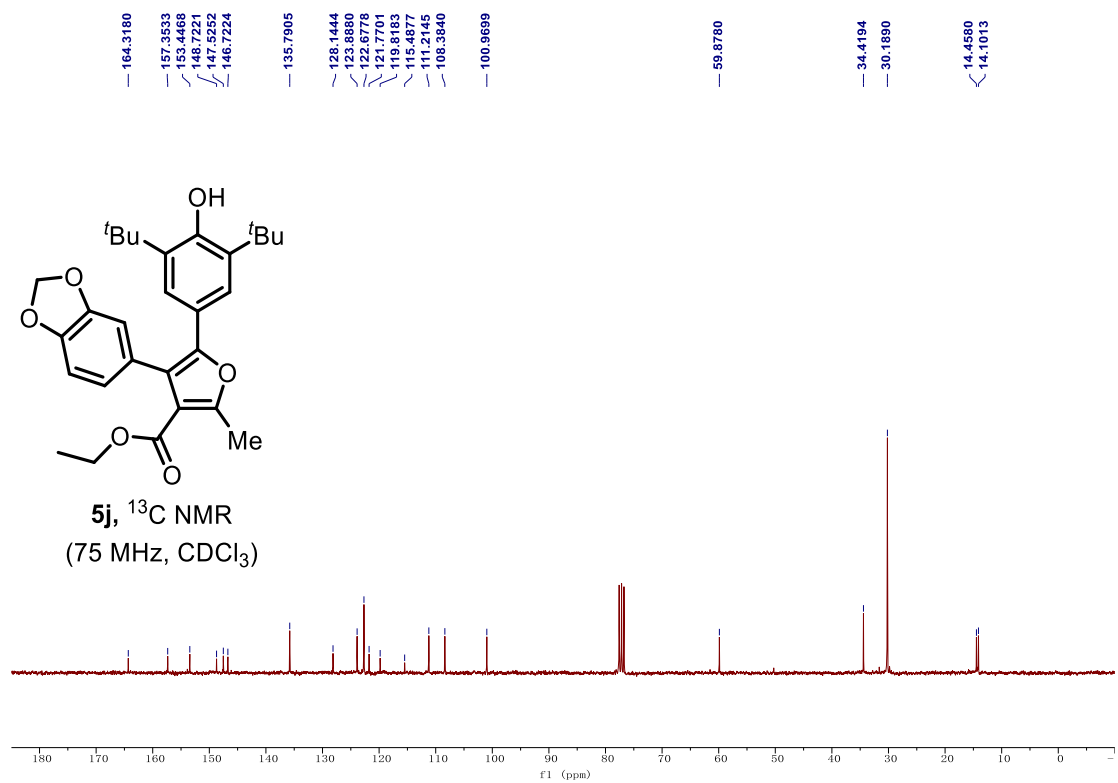

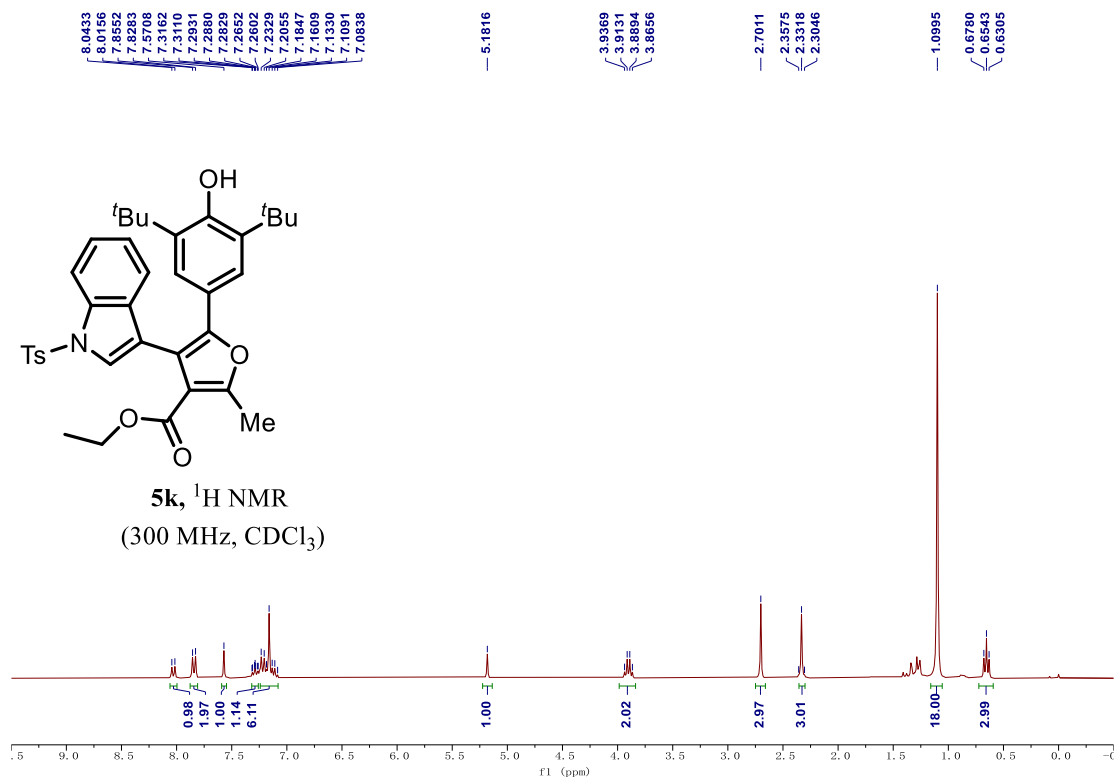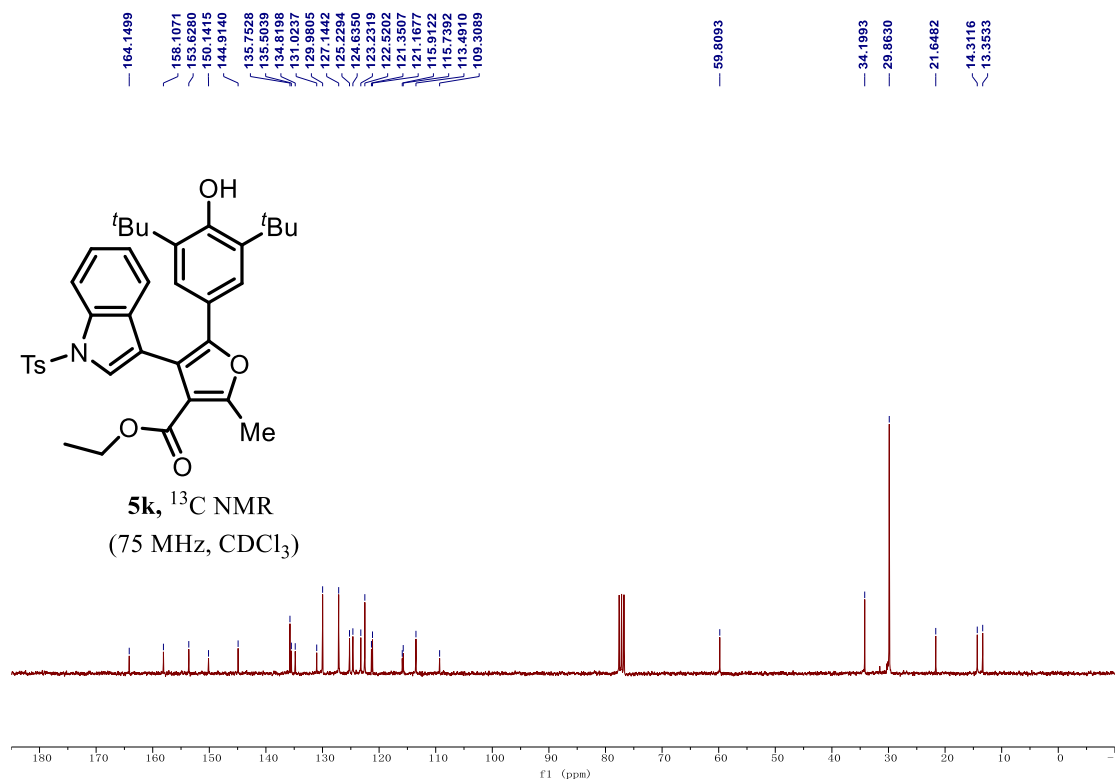



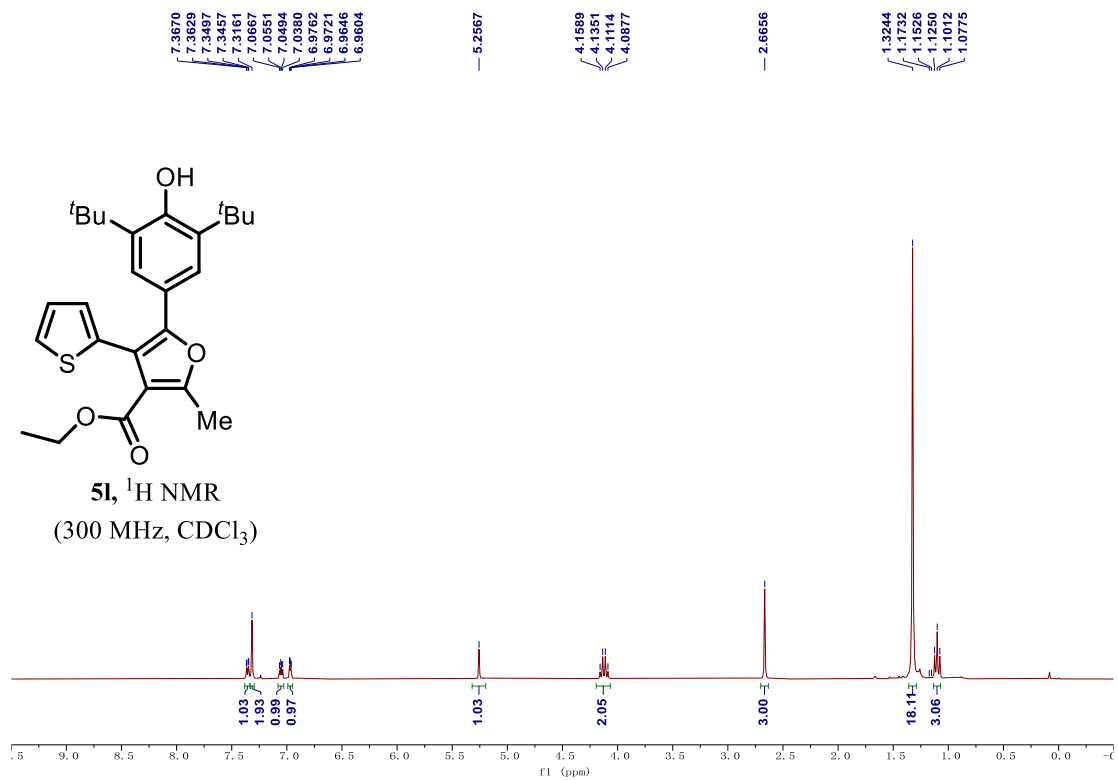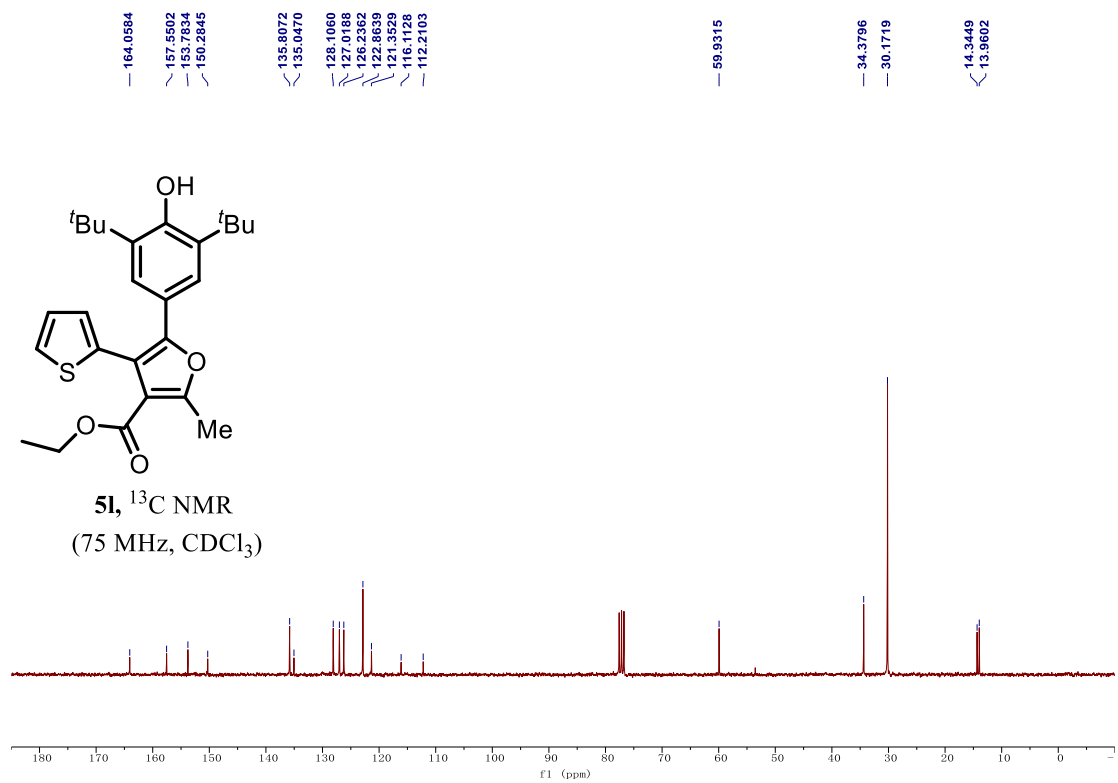

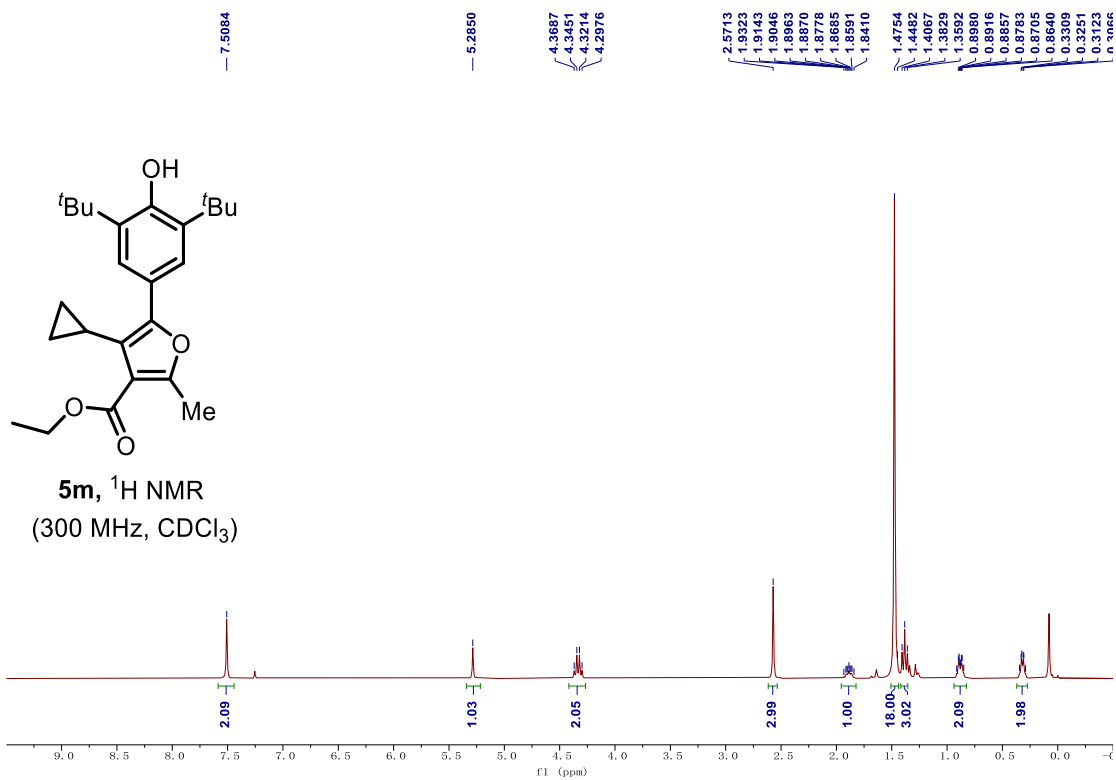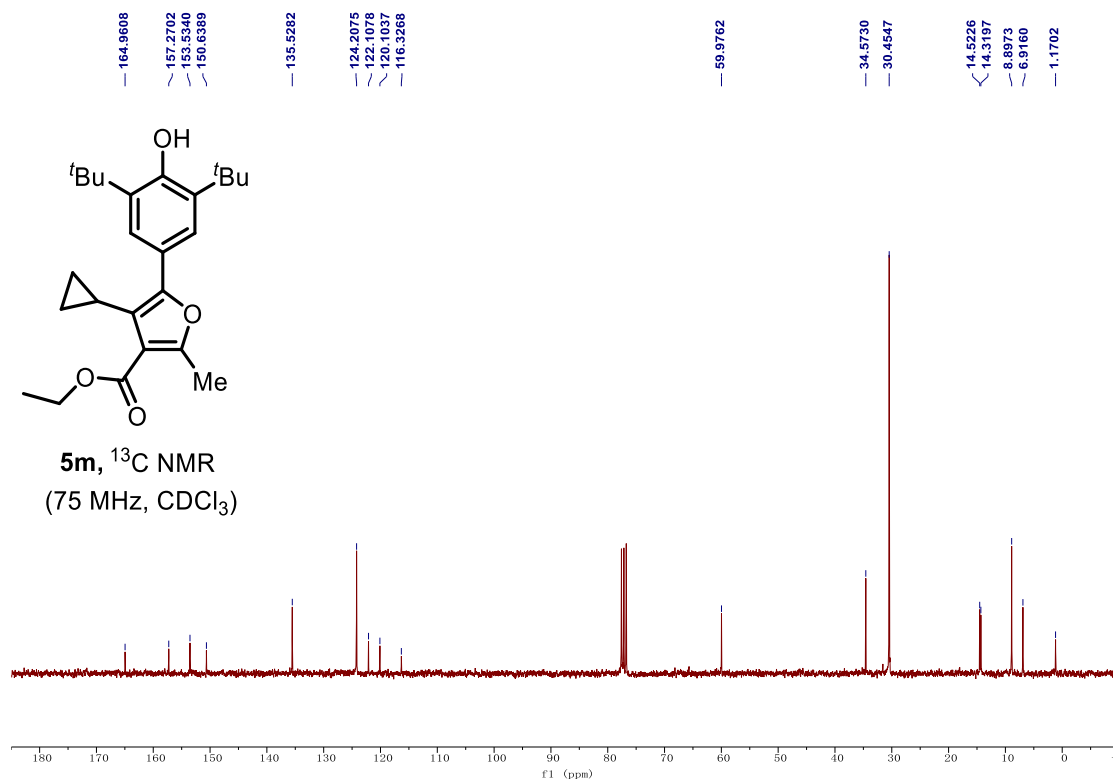

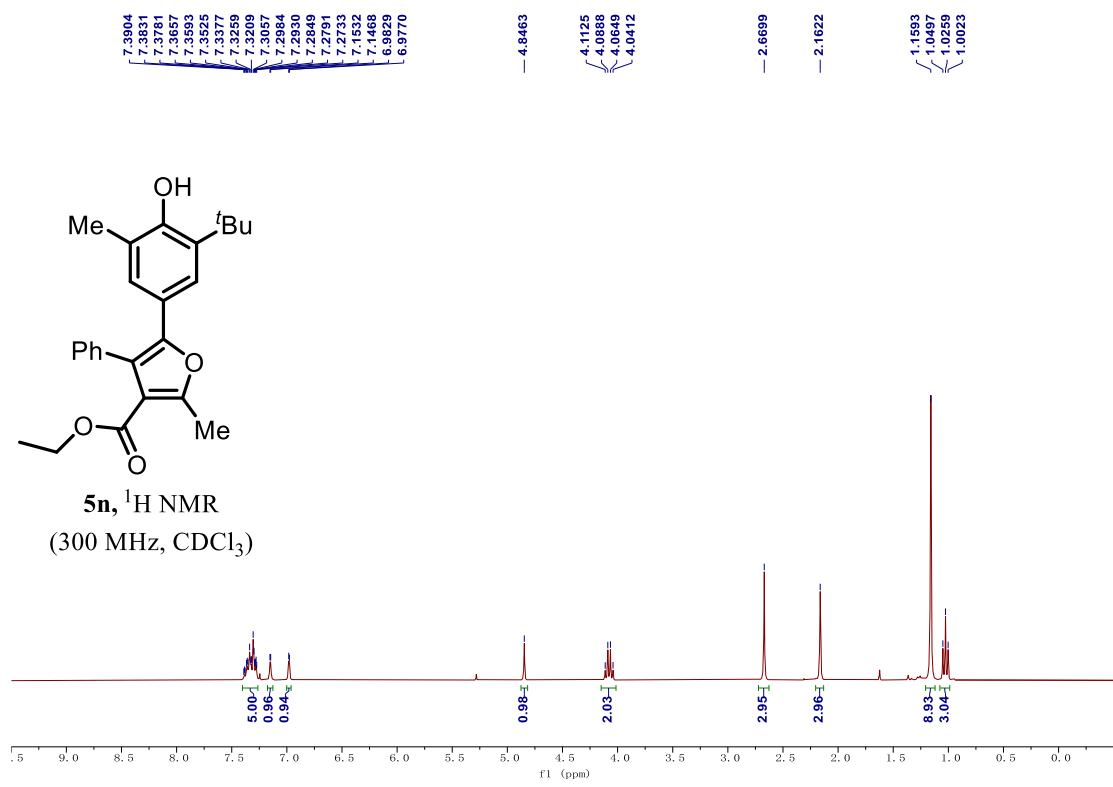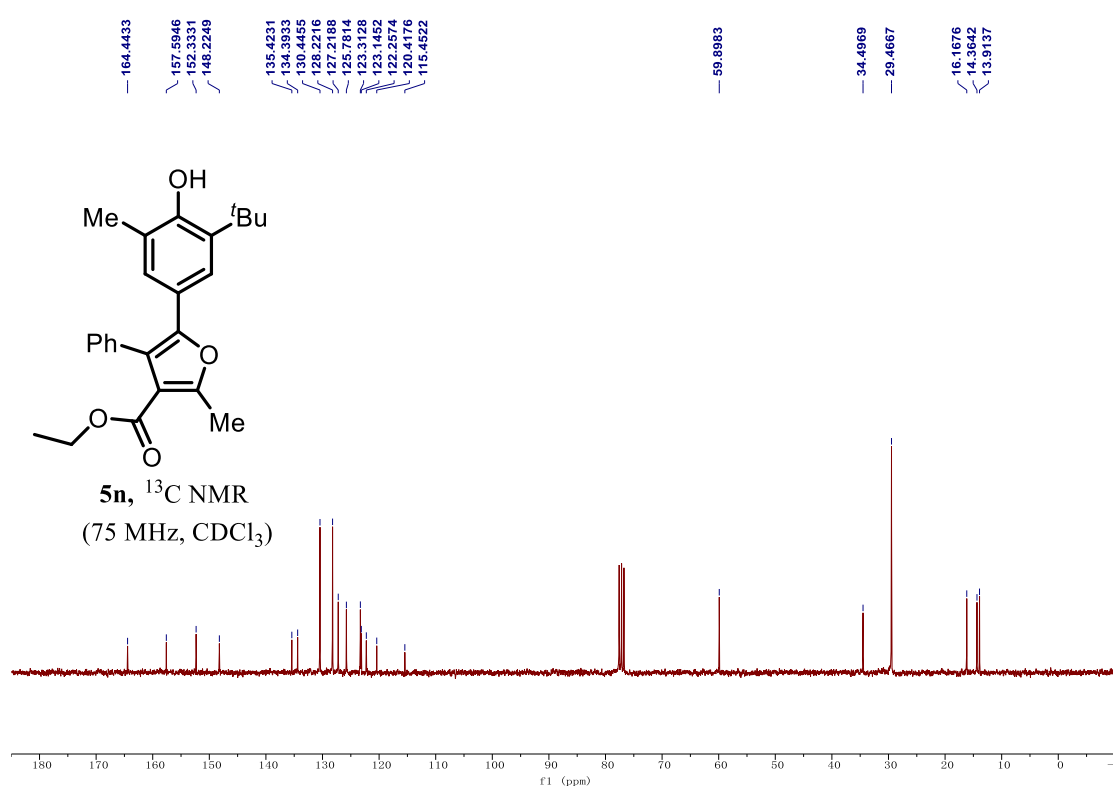

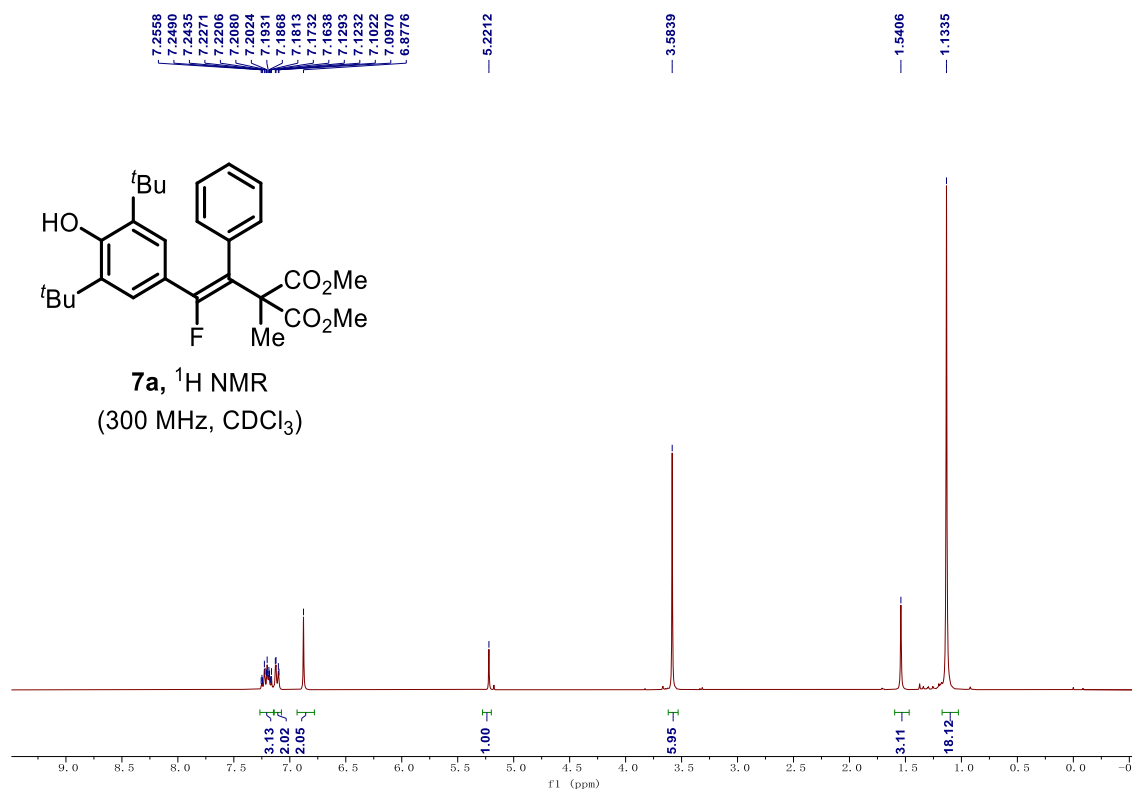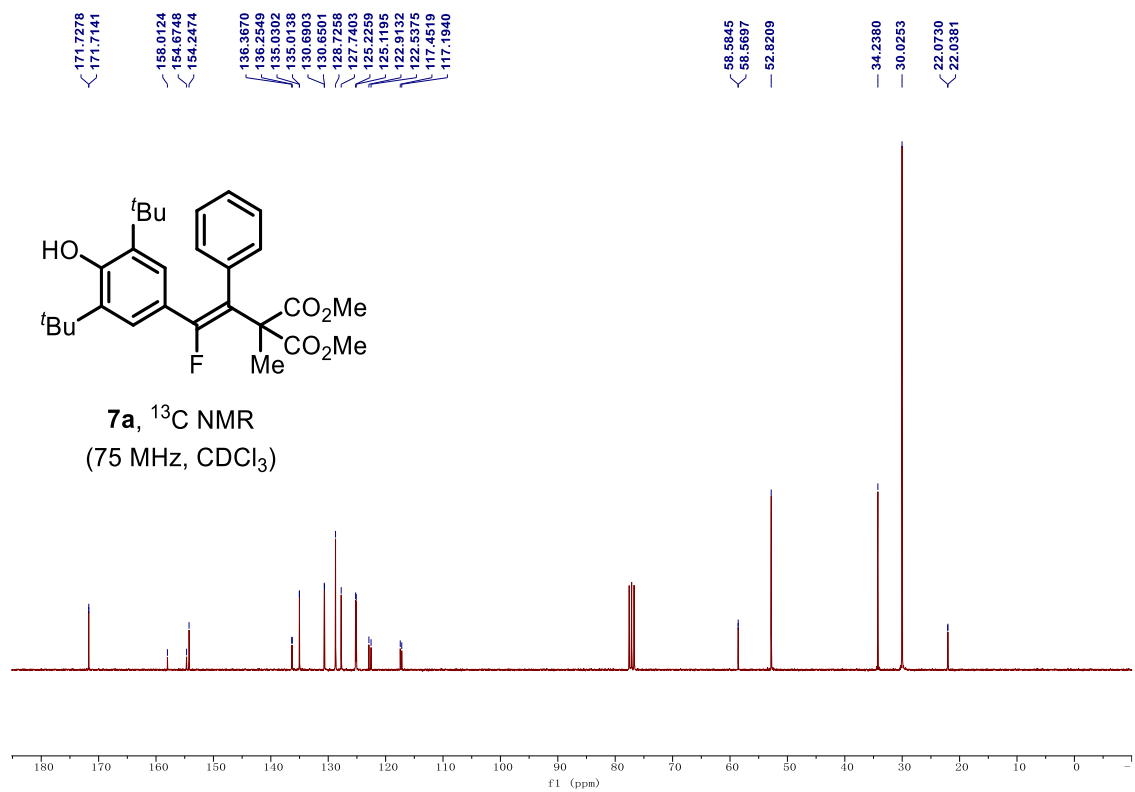

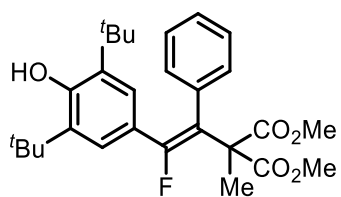

**7a**,  $^{19}\text{F}$  NMR  
(282 MHz,  $\text{CDCl}_3$ )

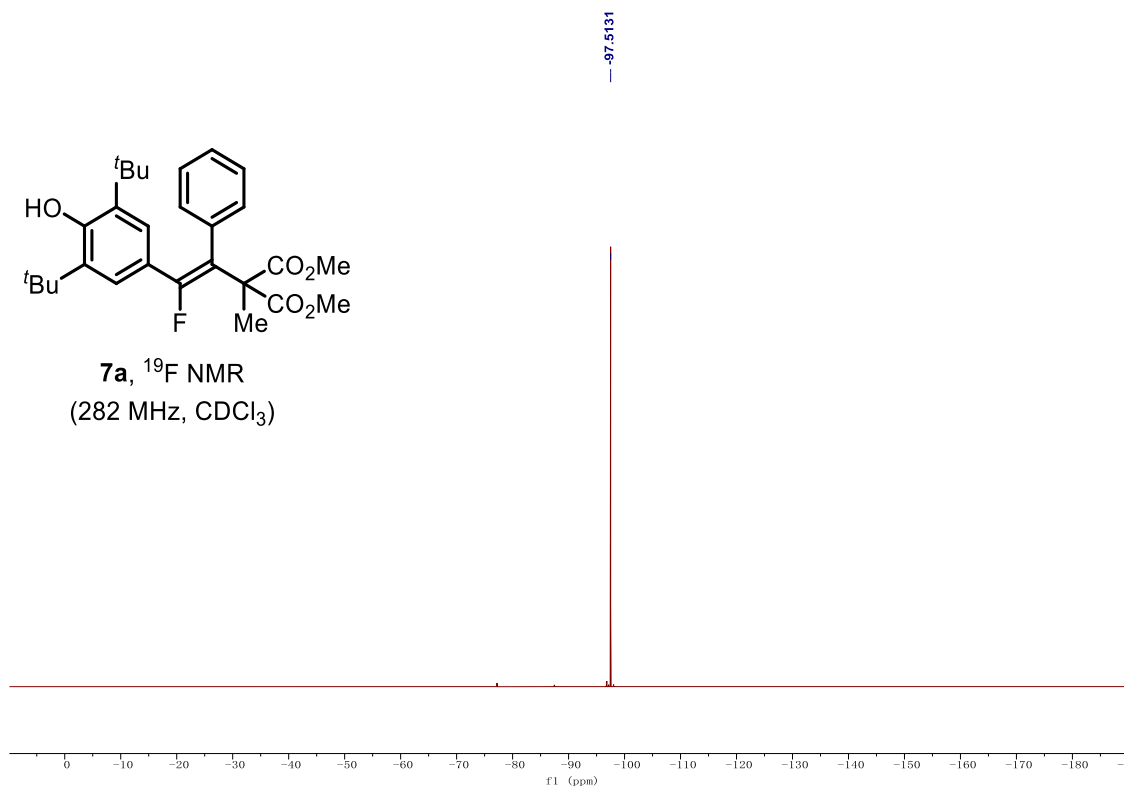

7.171  
7.160  
7.143  
7.126  
6.817

5.283  
5.078  
5.058  
5.020  
5.000

1.225

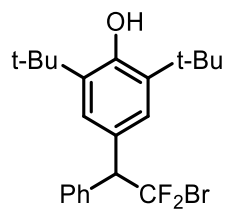

**8**,  $^1\text{H}$  NMR  
(300 MHz,  $\text{CDCl}_3$ )

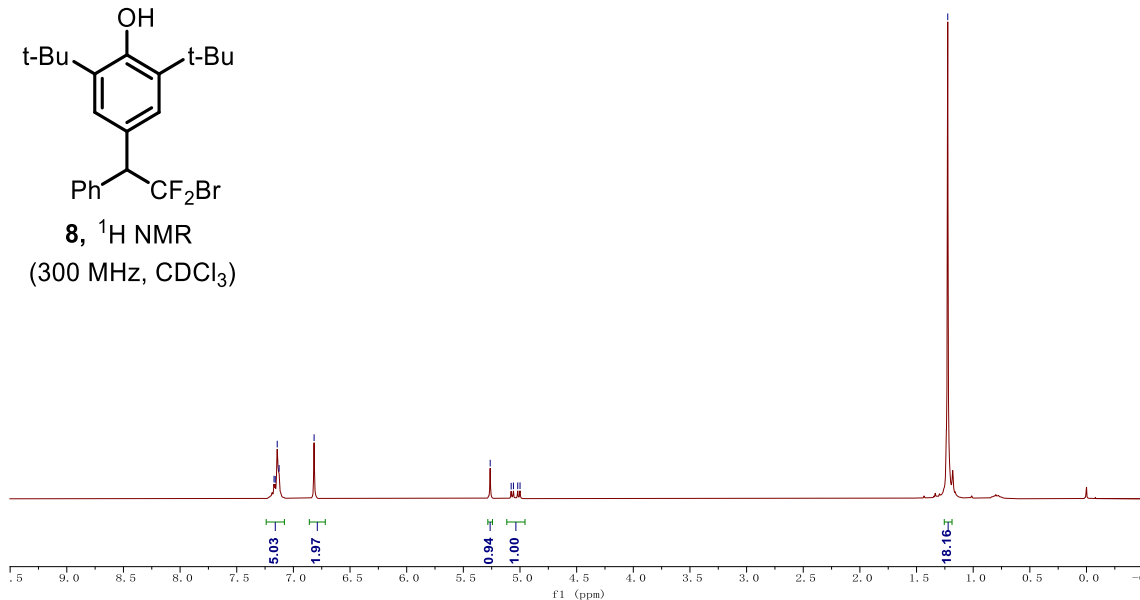

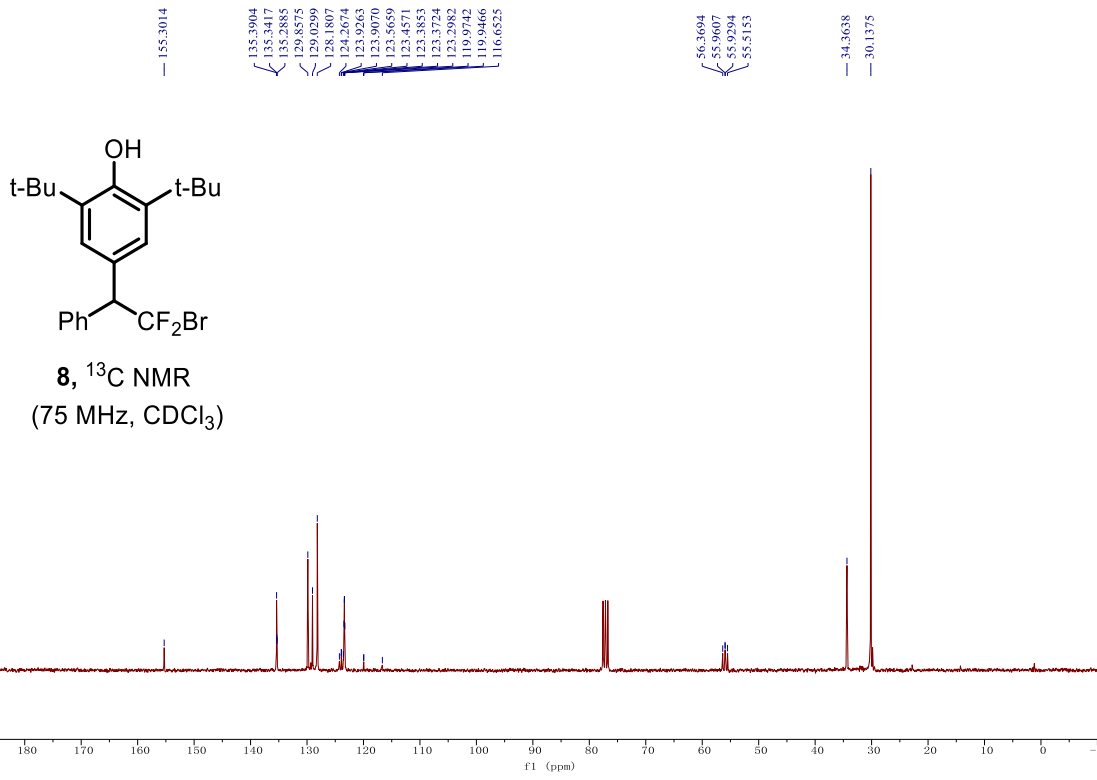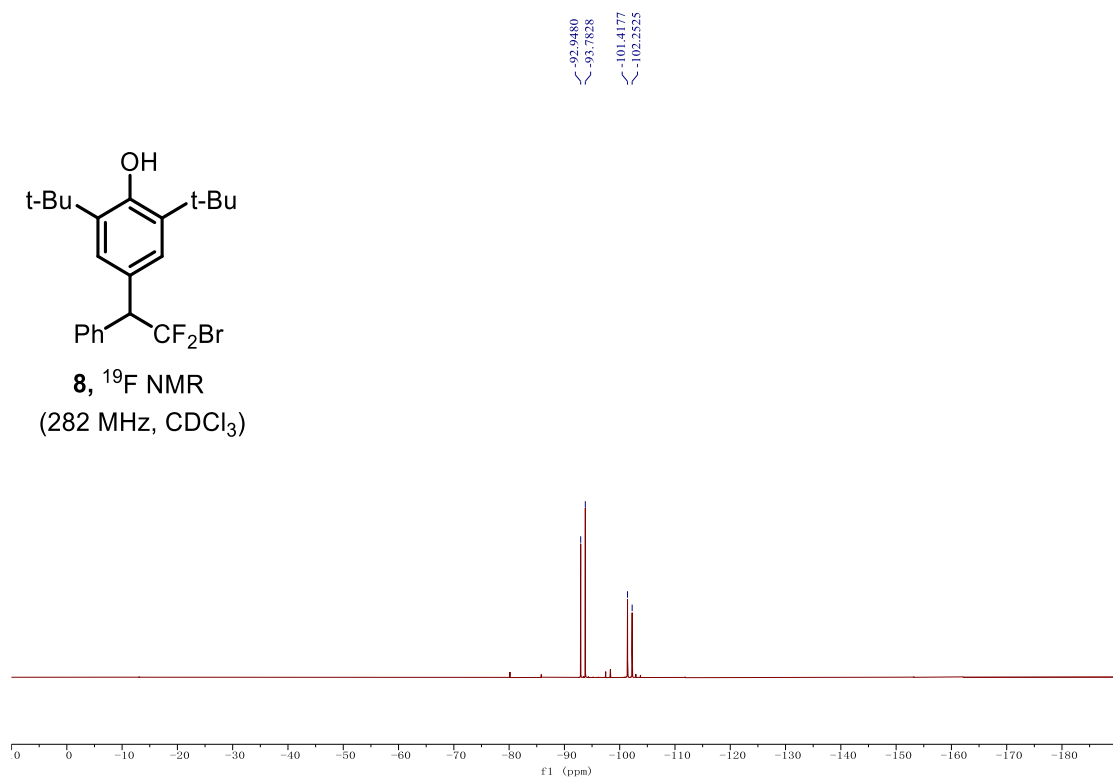

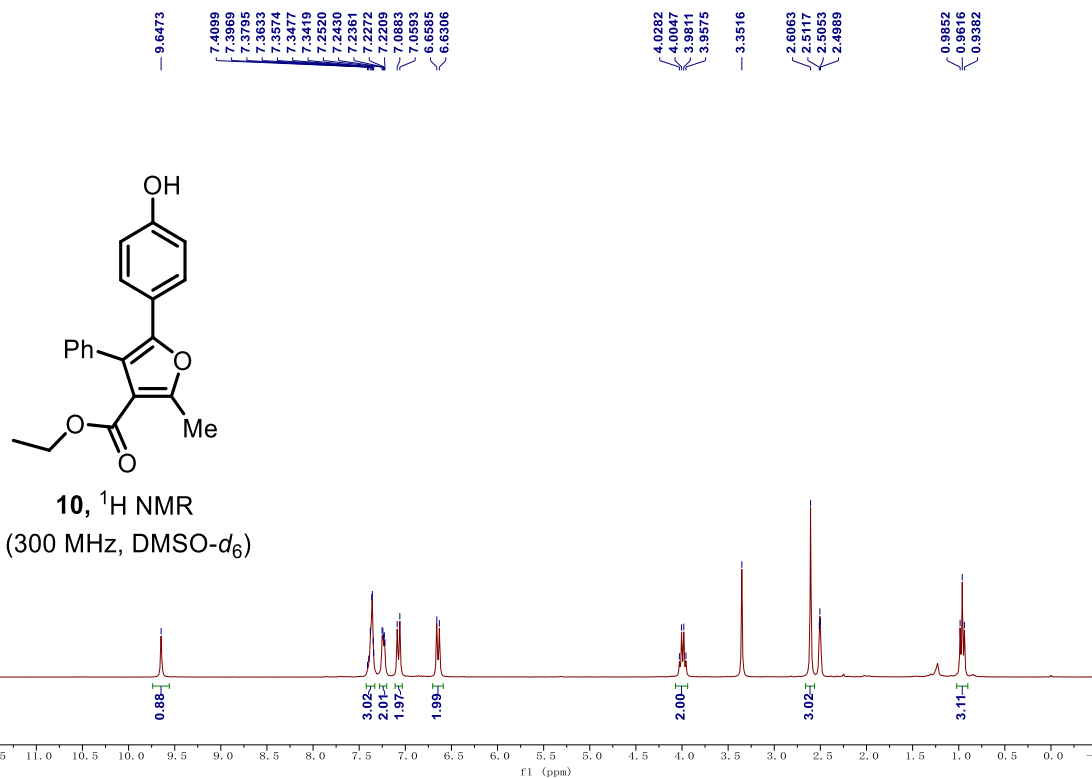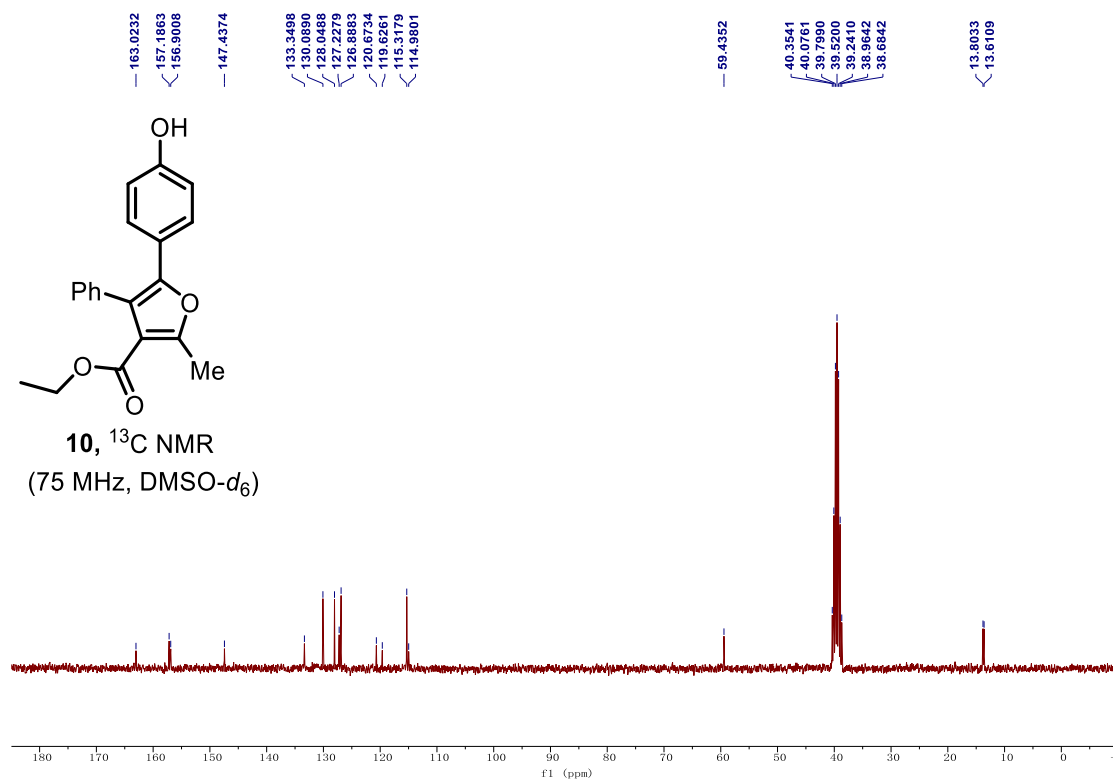

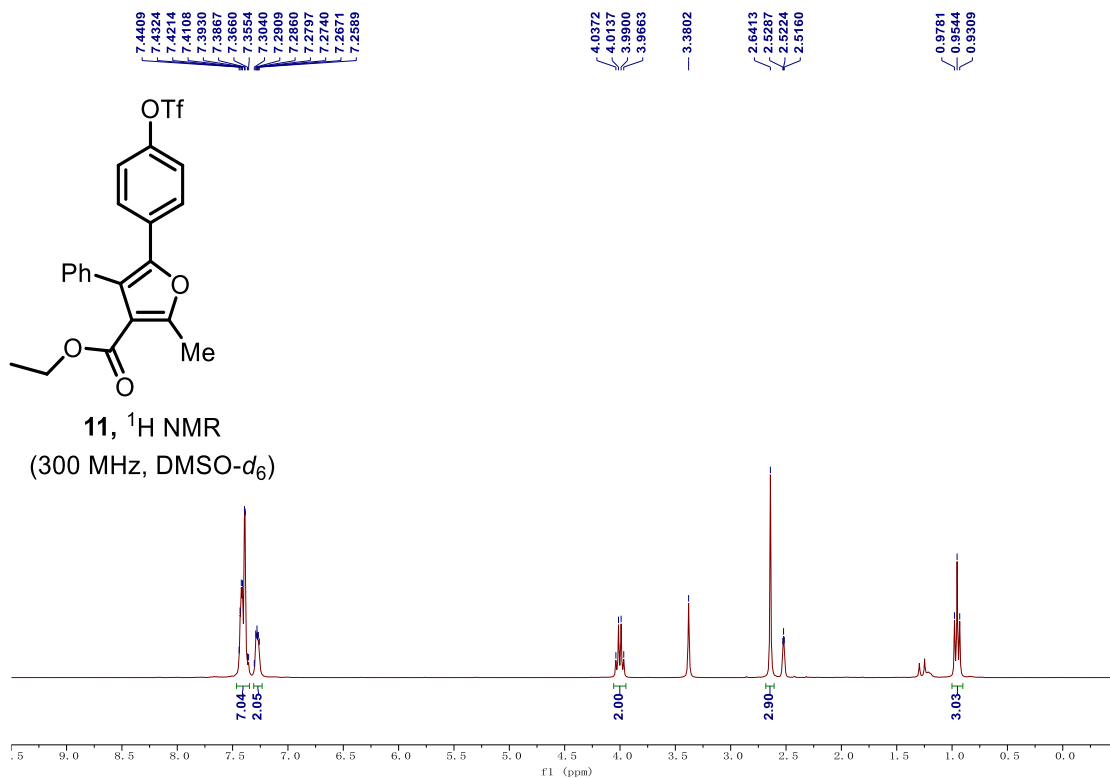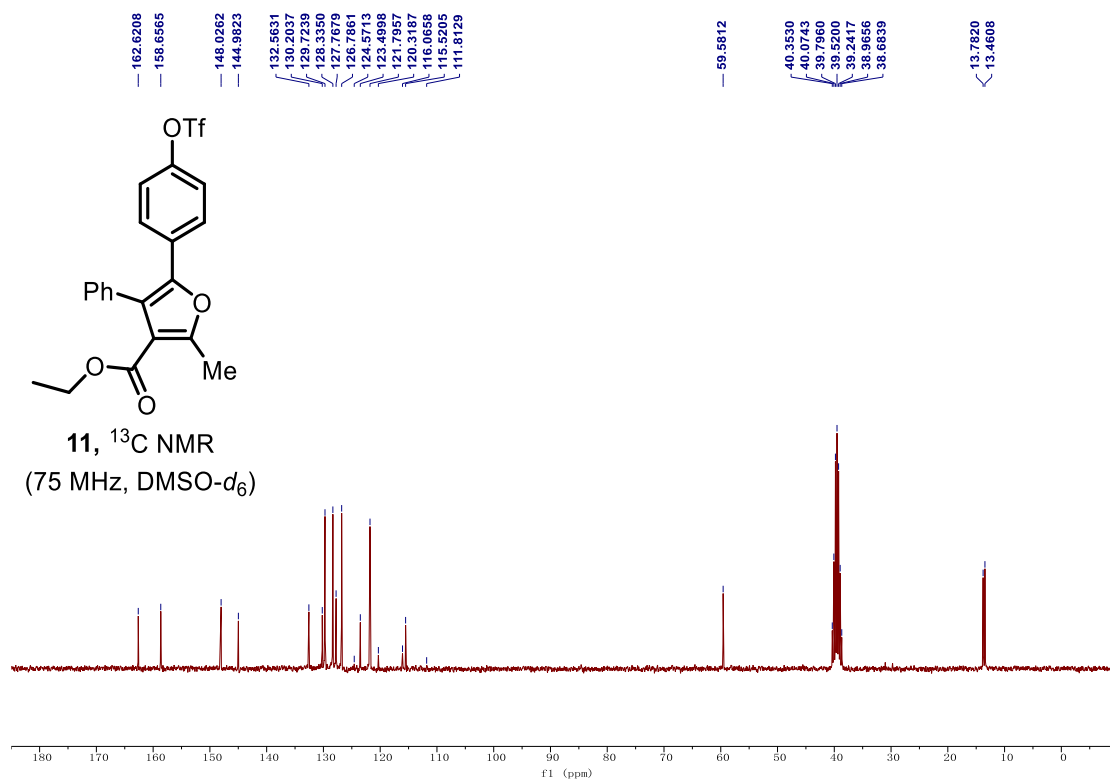



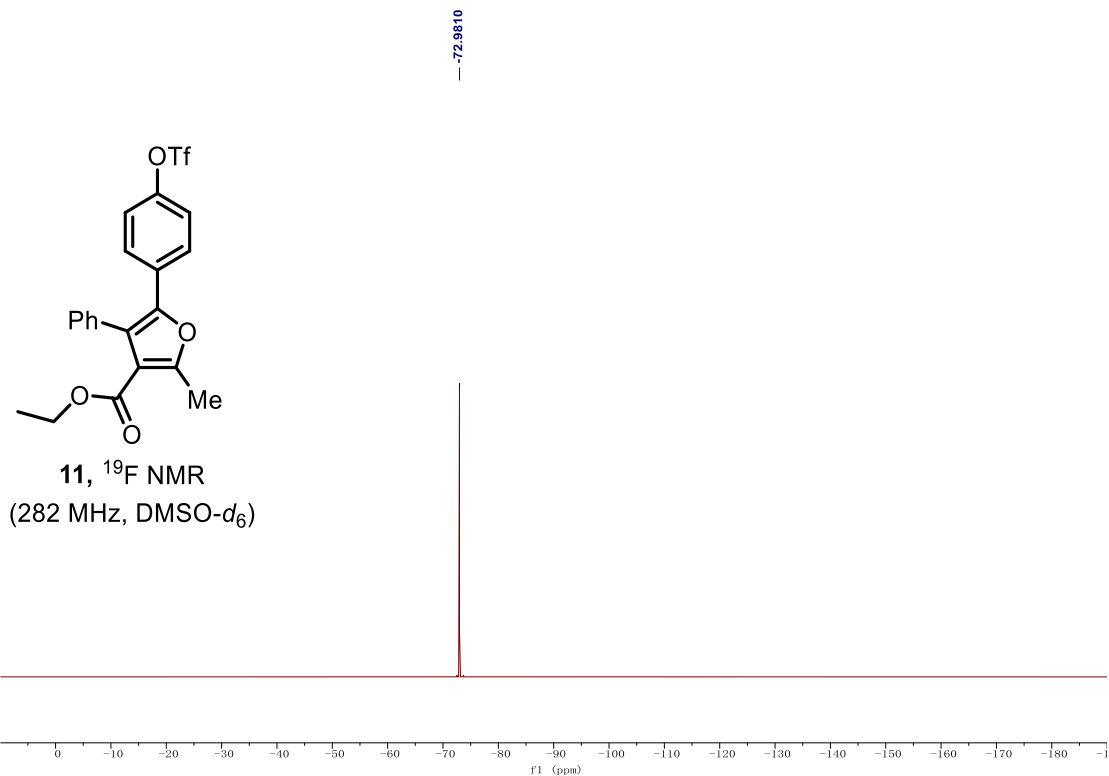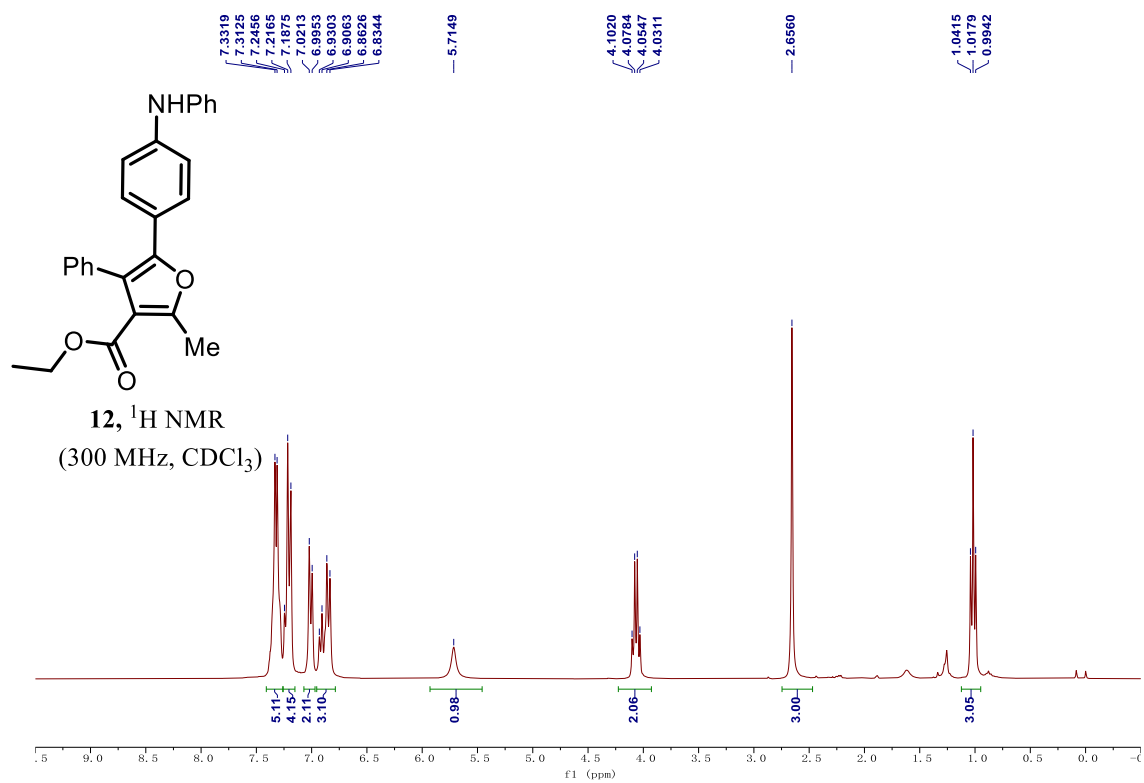

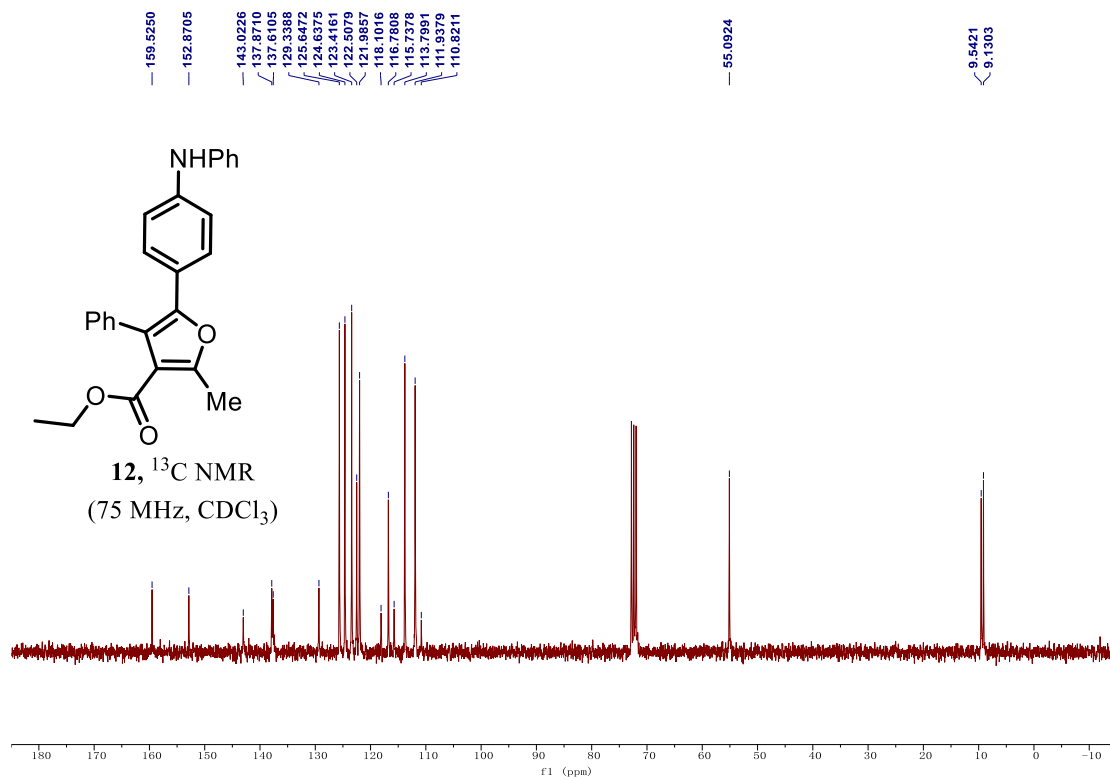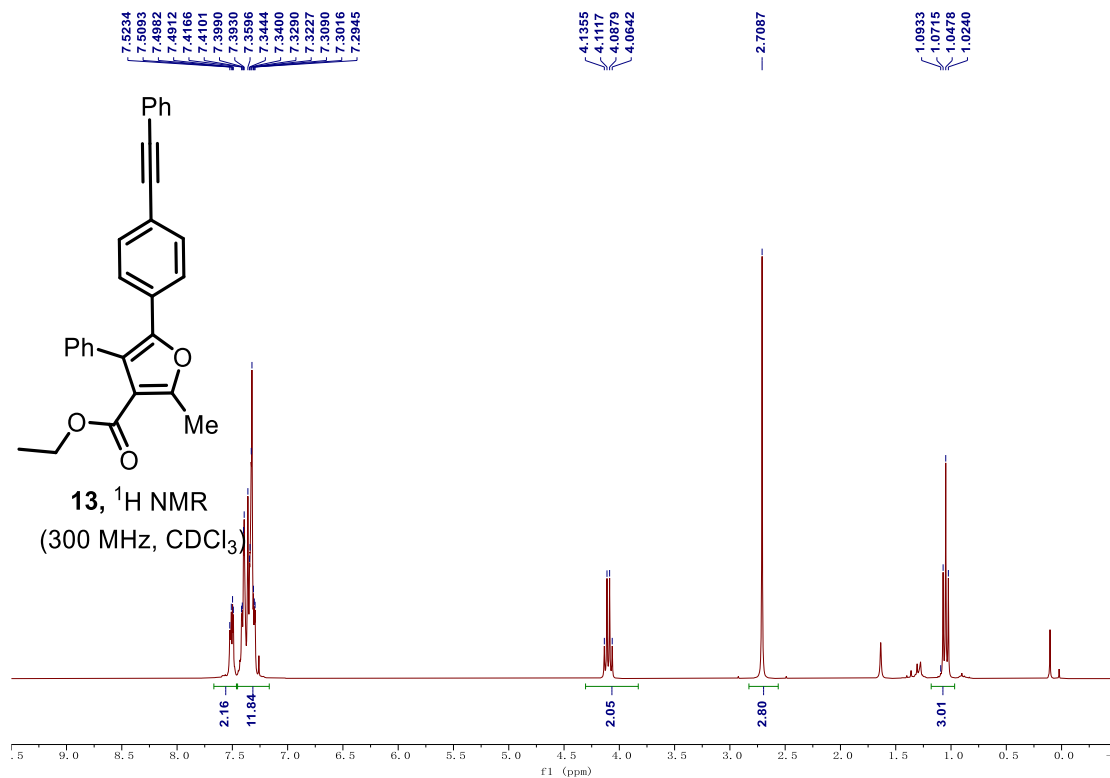

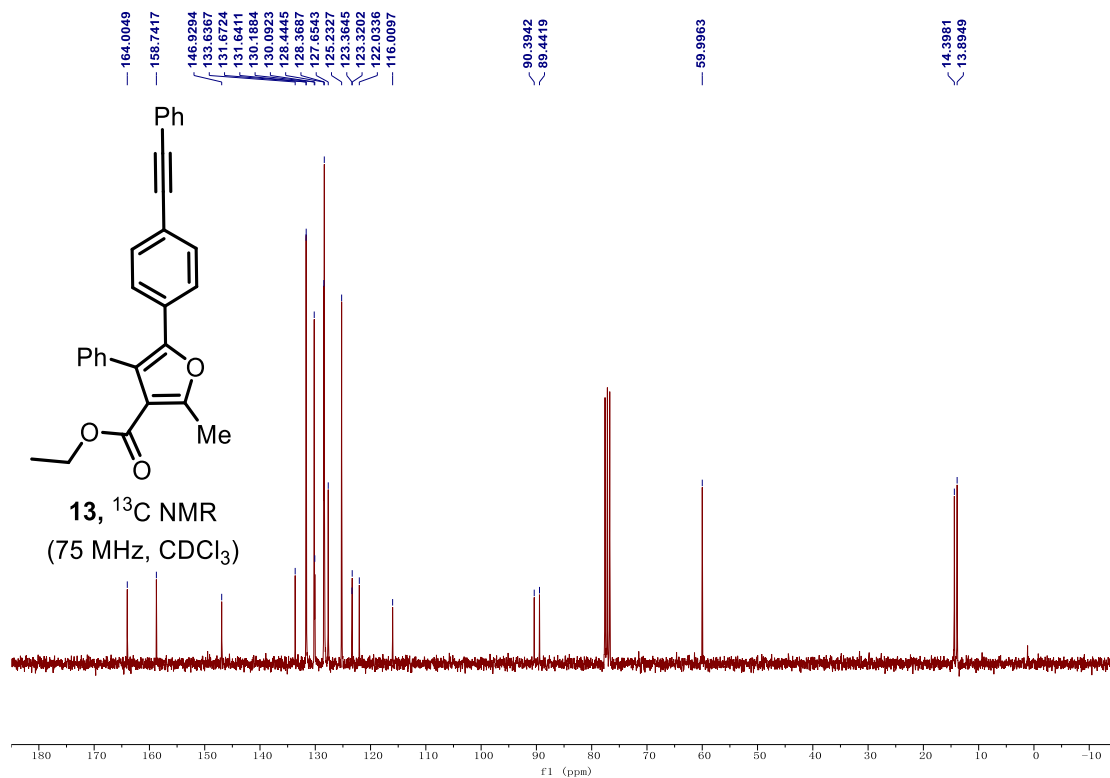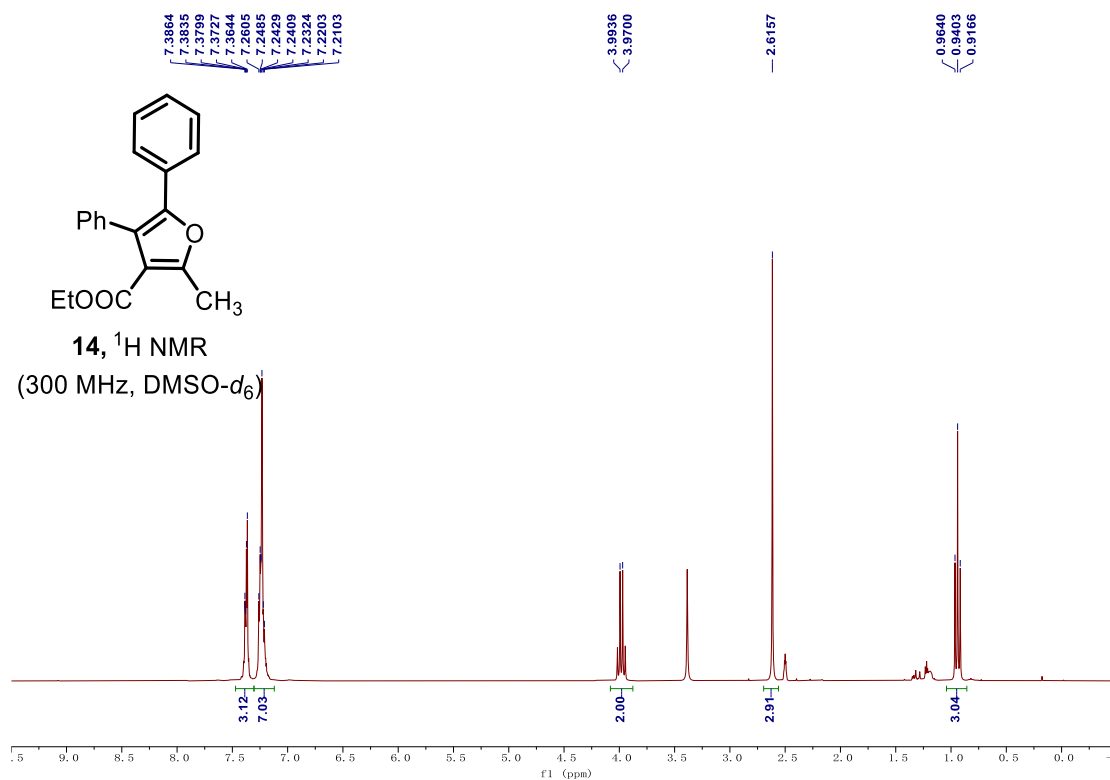

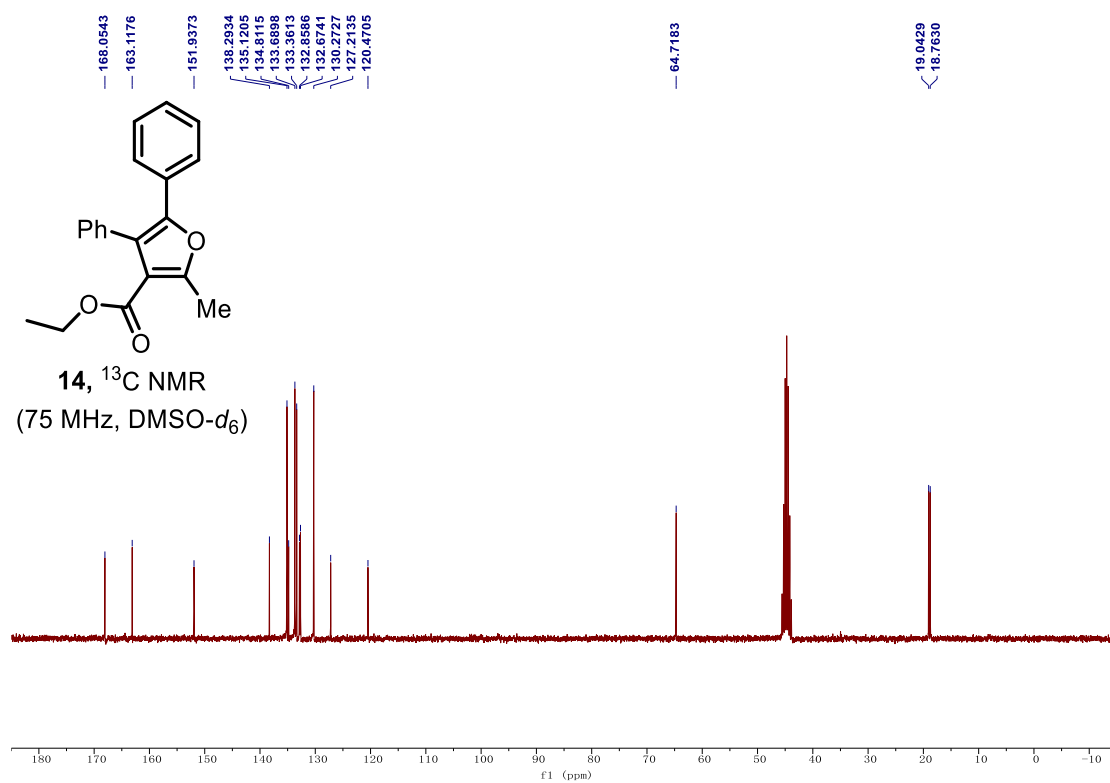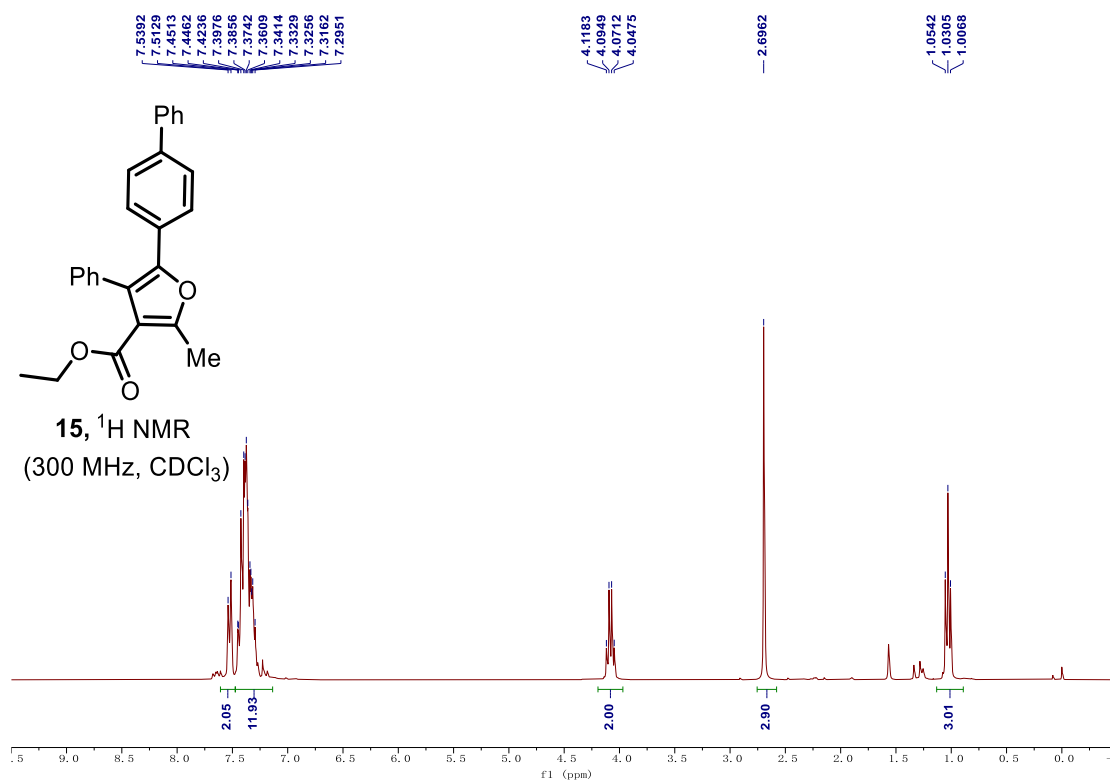

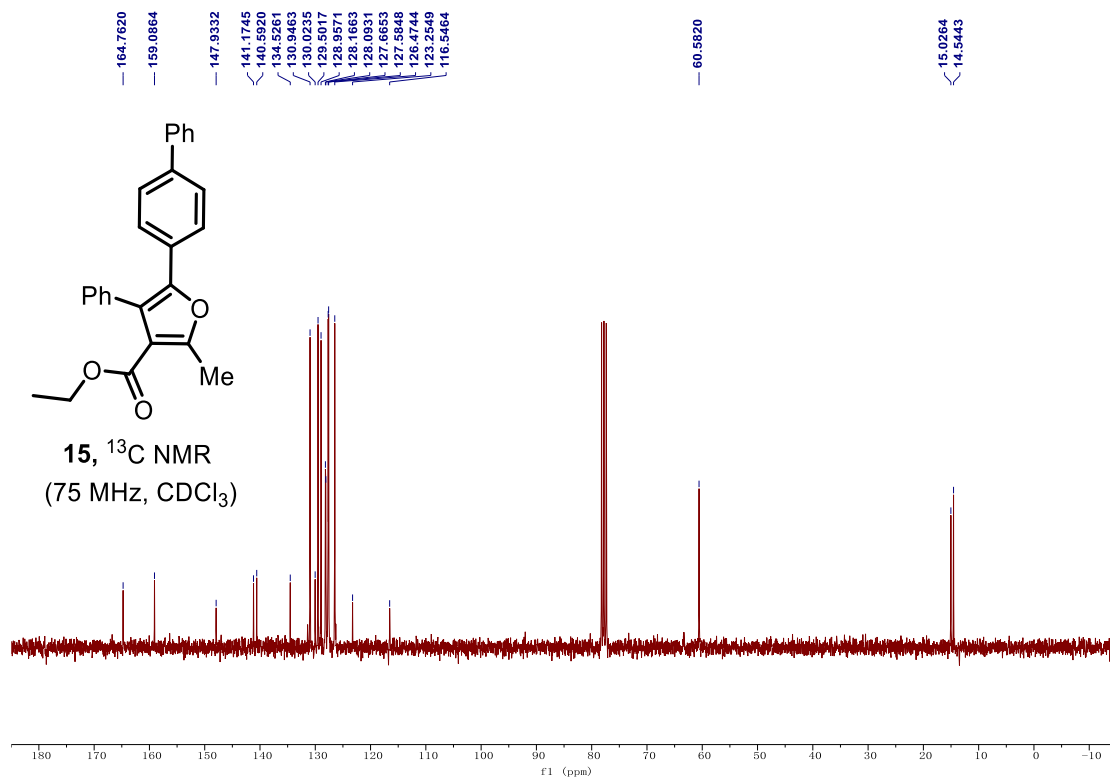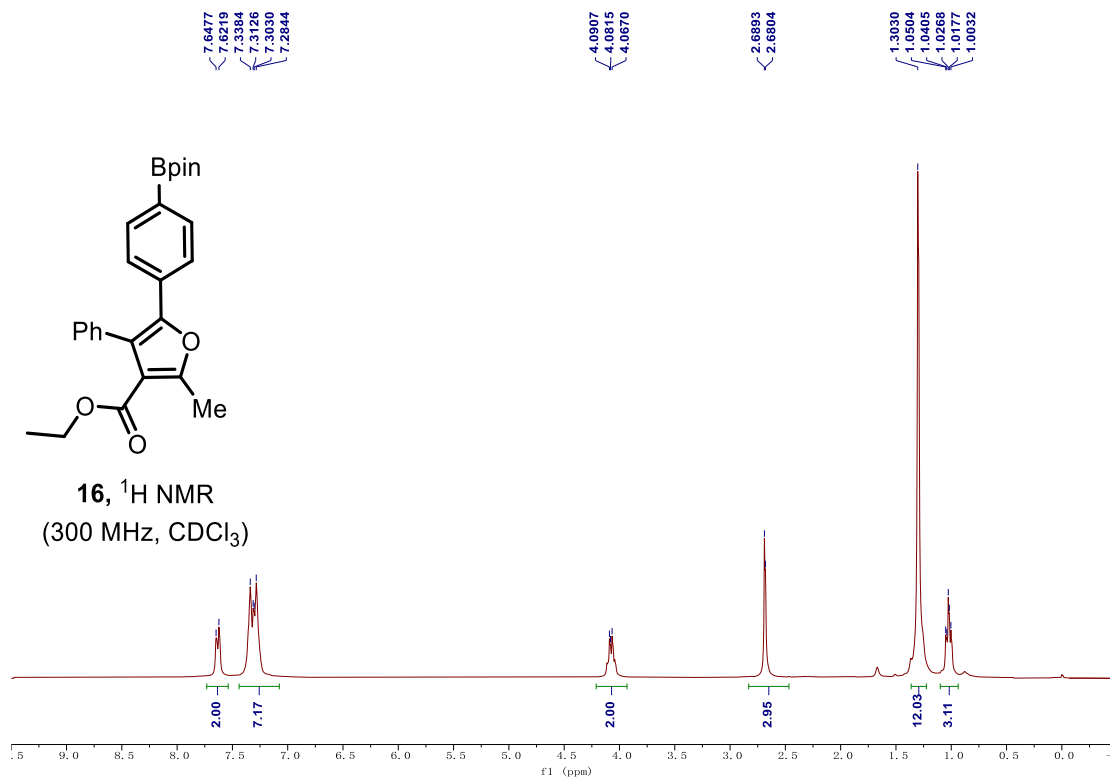

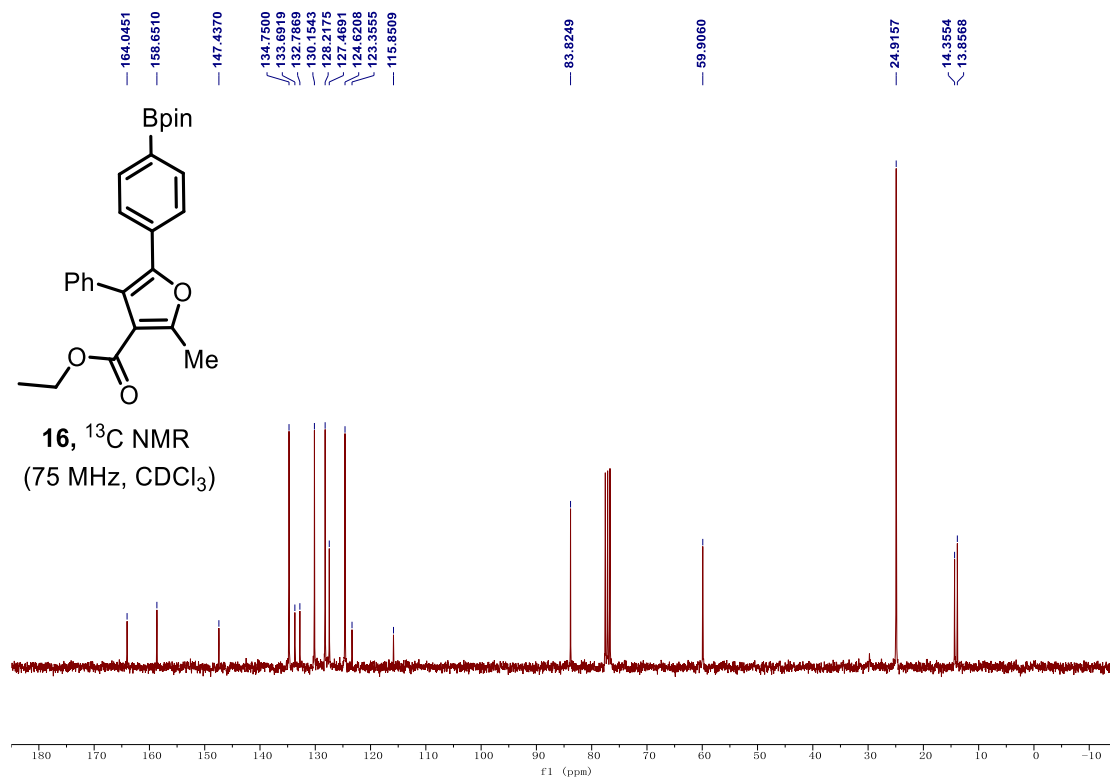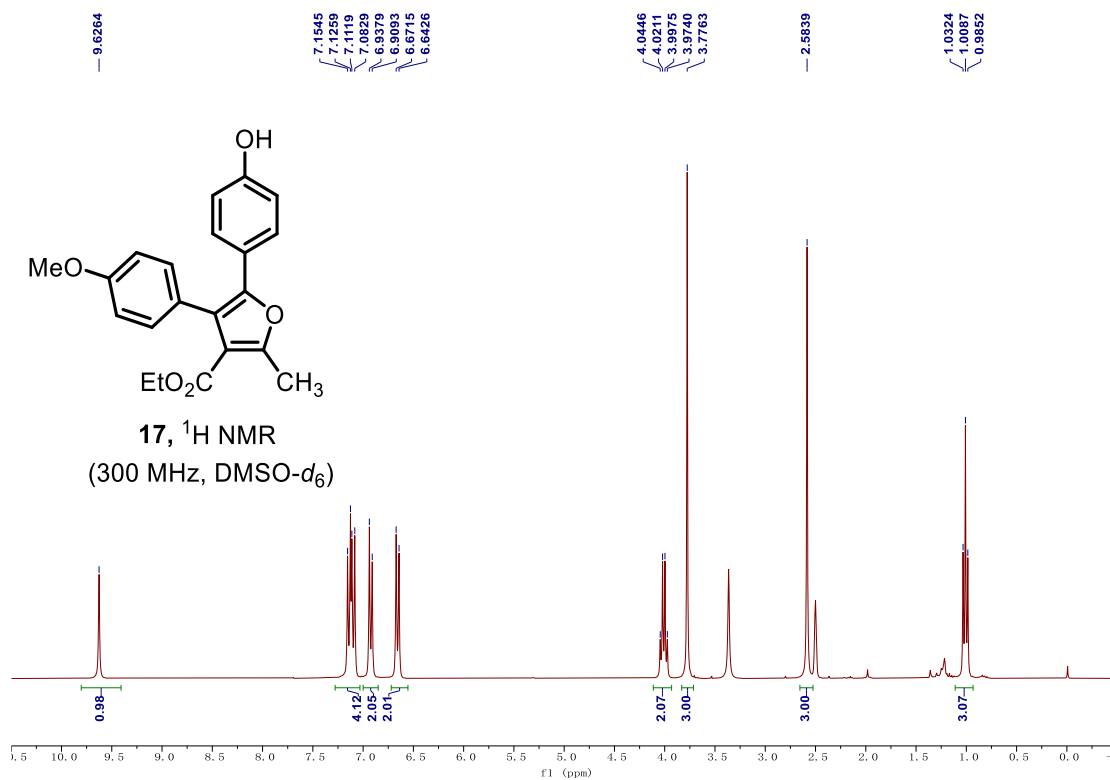

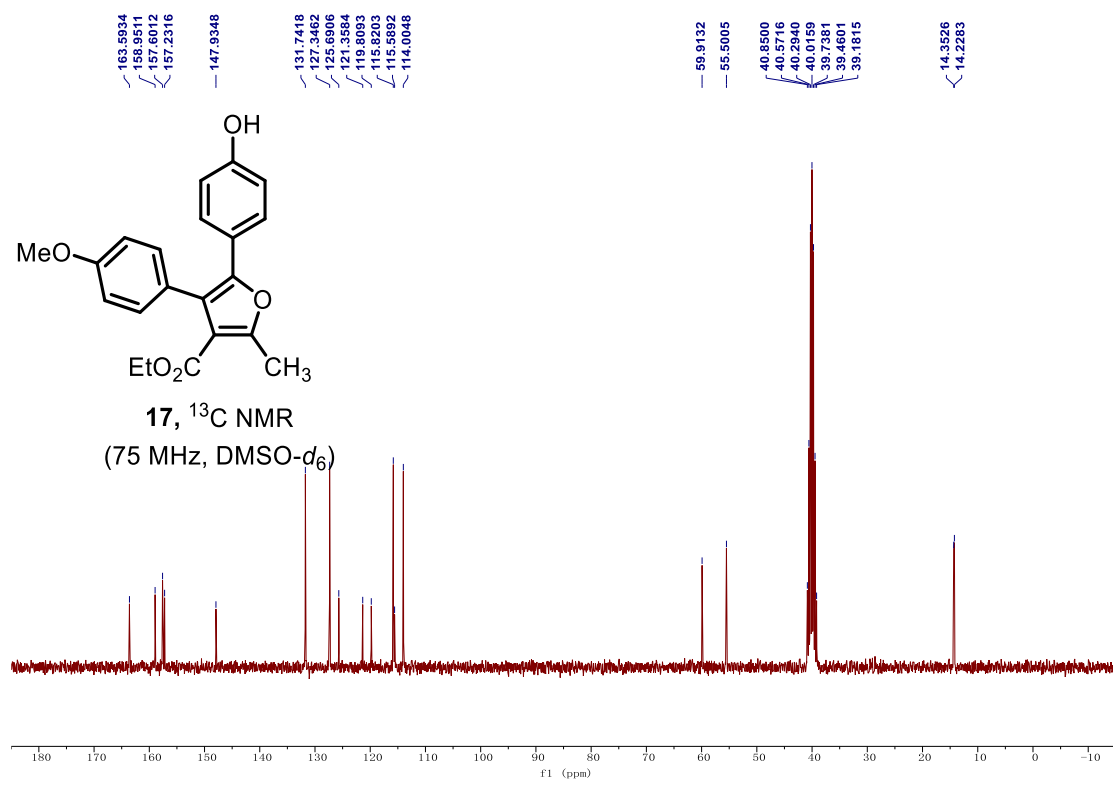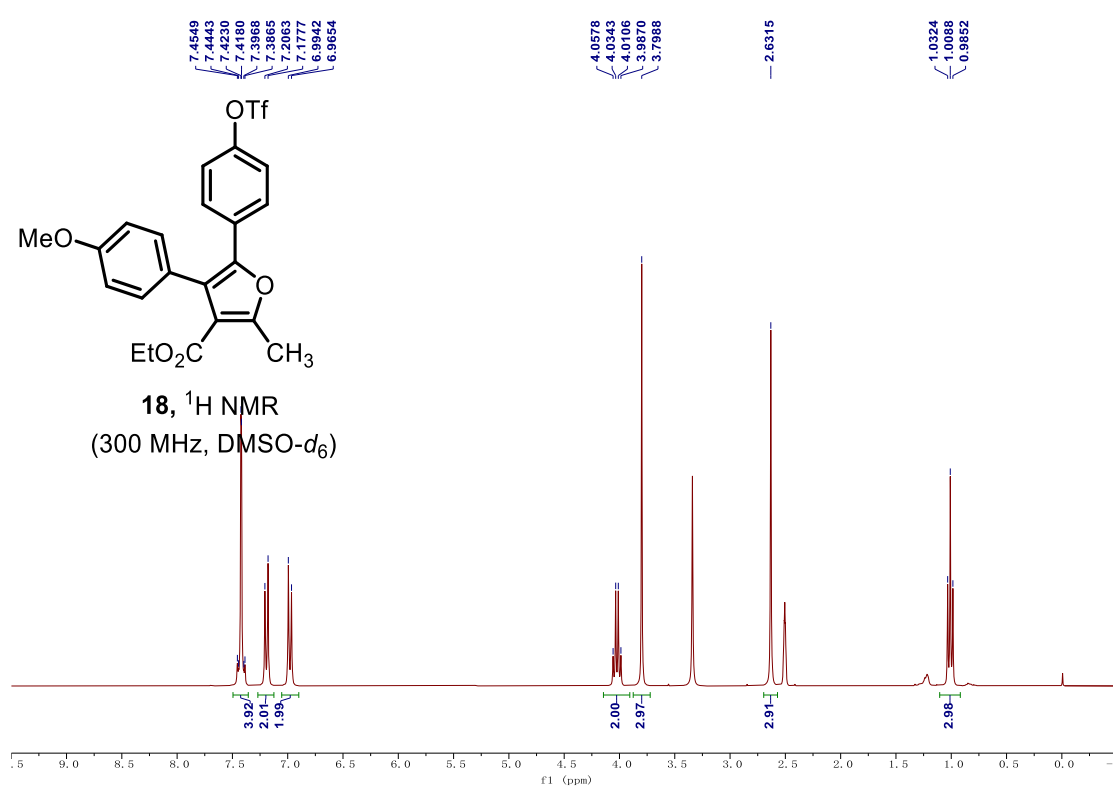

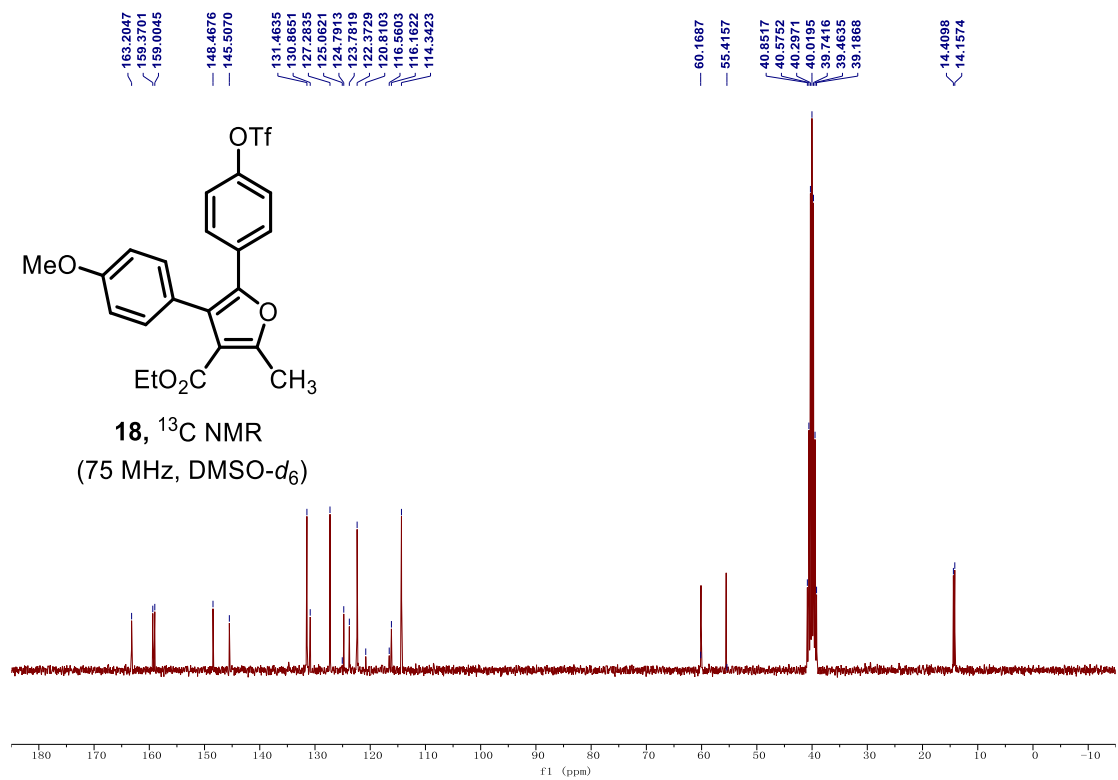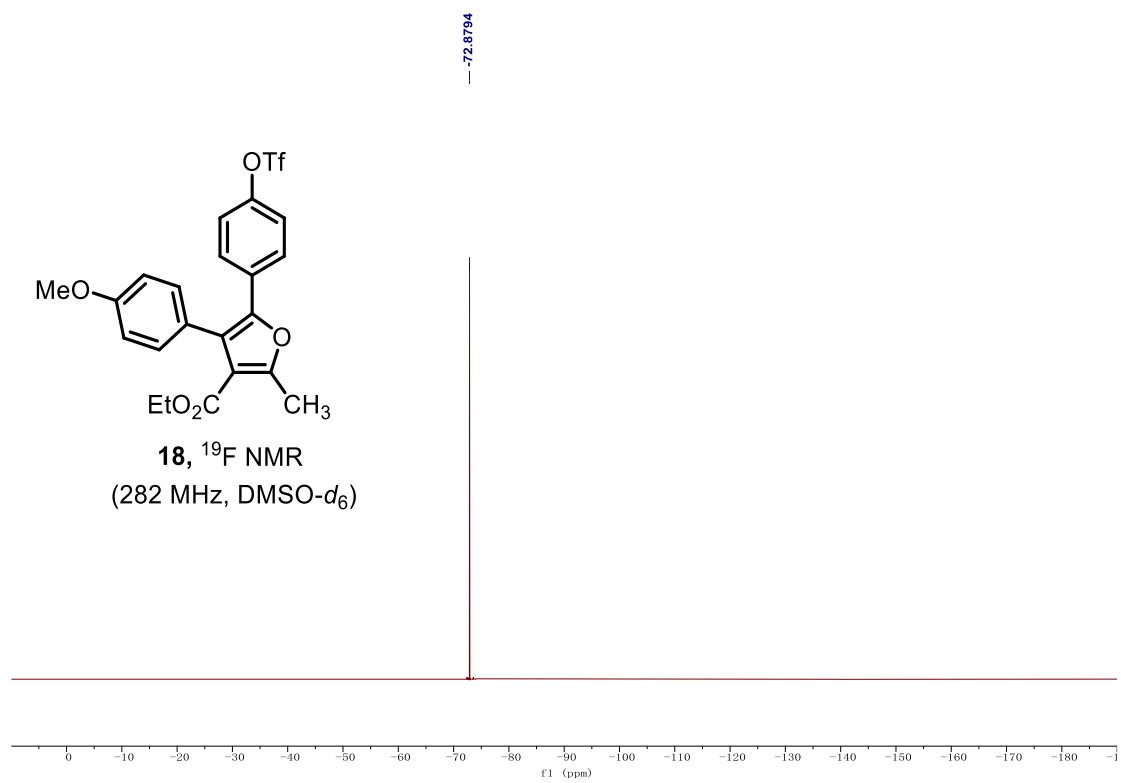



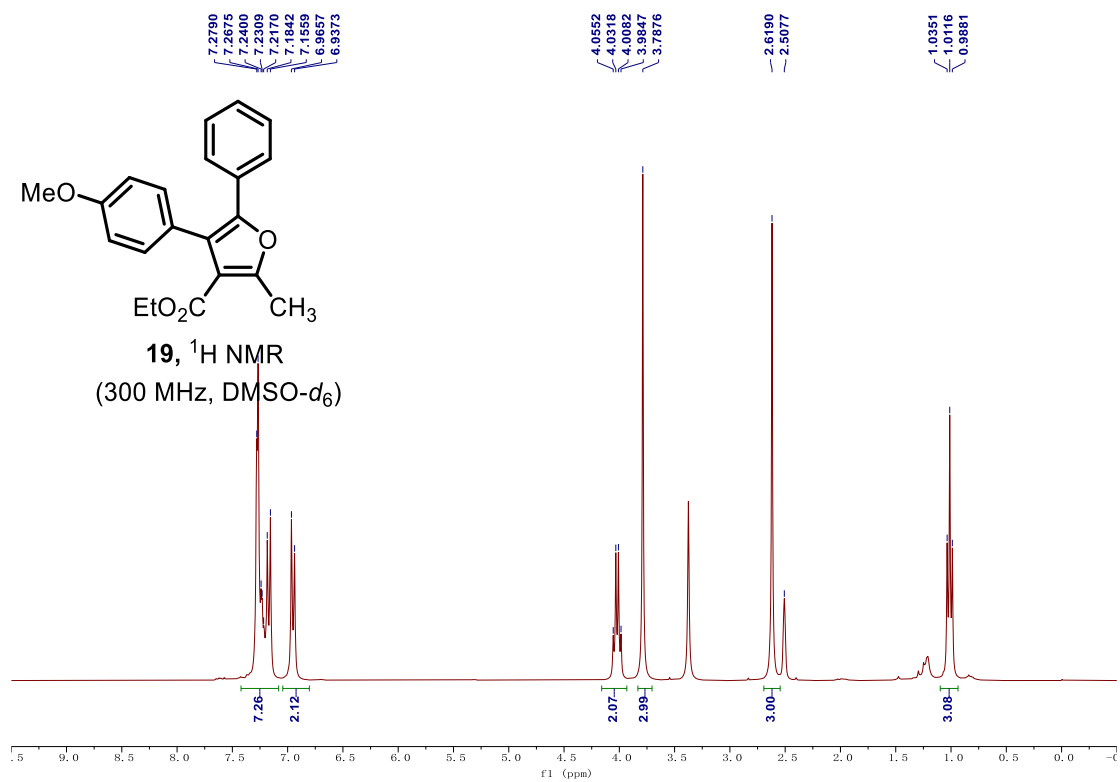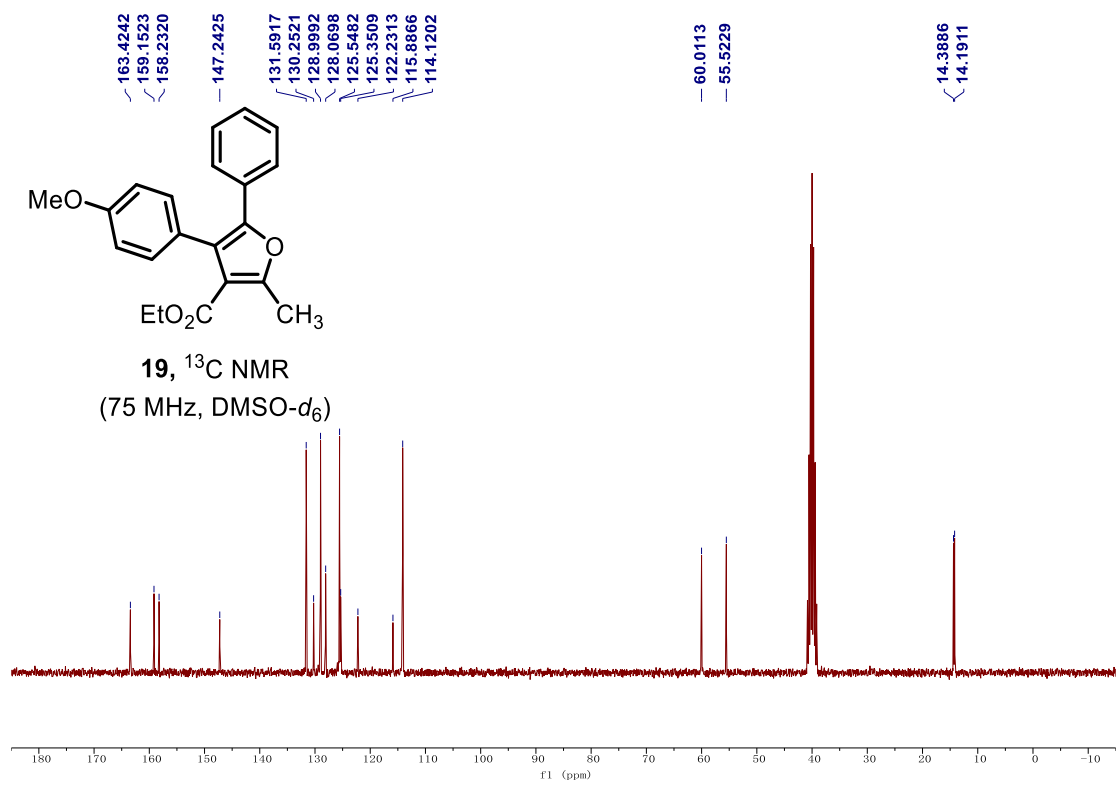

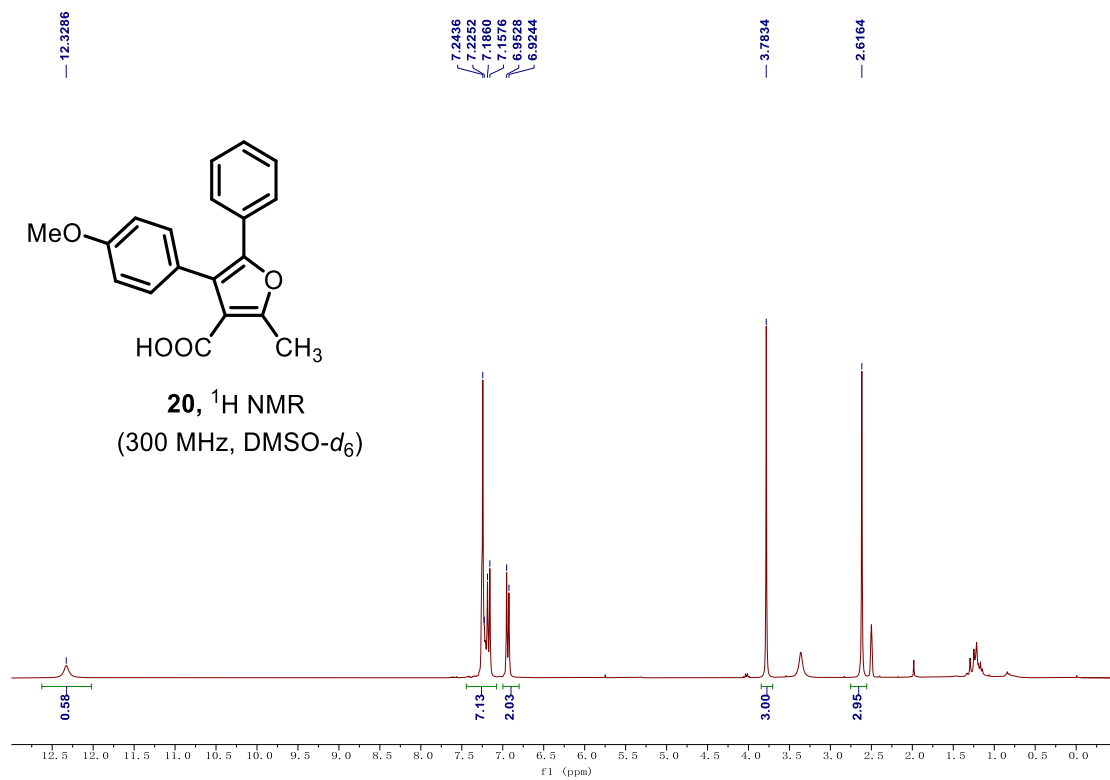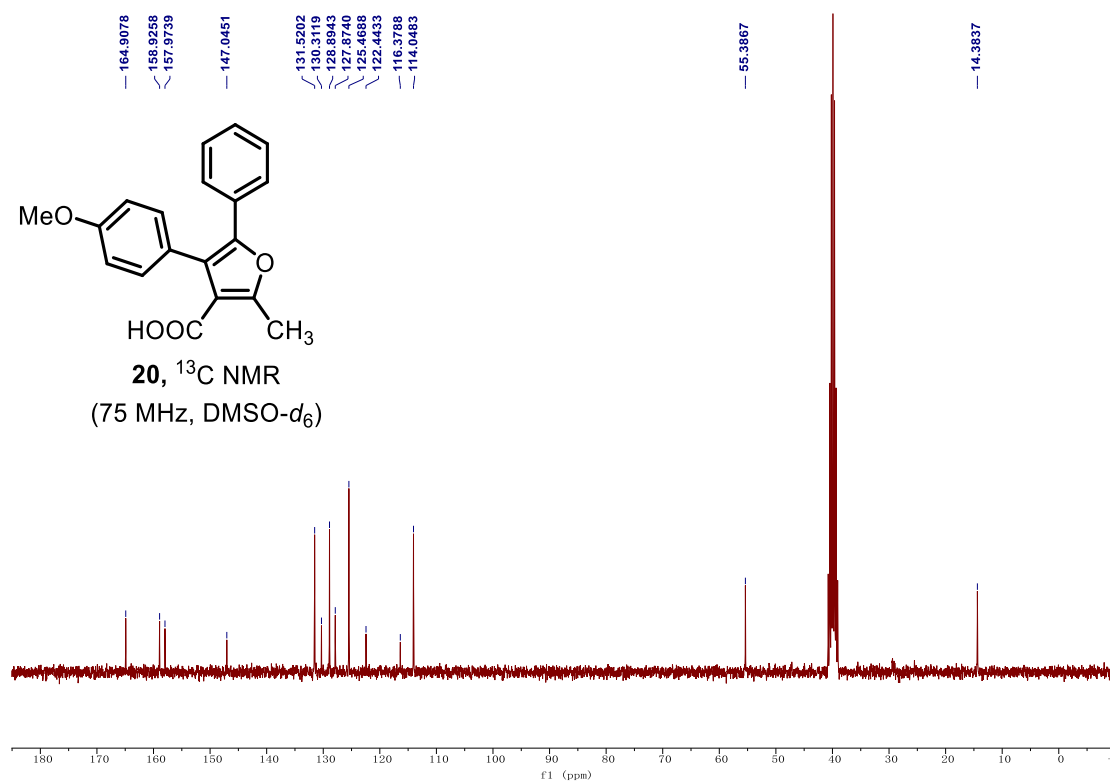

Supplement: d3qo02096g1.pdf [file d3qo02096g1.pdf]
